# Supplementary material for: Coordinated Concentration Changes of Transcripts and Metabolites in Saccharomyces cerevisiae
Source: PLoS Comput Biol. 2009 Jan 30;5(1):e1000270. doi: 10.1371/journal.pcbi.1000270 (PMC2614473; doi:10.1371/journal.pcbi.1000270)
Supplement: Dataset S1 — Transcript data. Transcriptional data, expressed as log2 ratios to time zero, for 10, 30, 60, 120, 240, and 480 minutes post-induction of nitrogen starvation (removal of ammonium) or carbon starvation (removal of glucose). (2.20 MB XLS) [file pcbi.1000270.s001.xls]

## Sheet: yeast_expn.pcl
YORF	NAME	GWEIGHT	C10	C30	C60	C120	C240	C480	N10	N30	N60	N120	N240	N480
EWEIGHT			1	1	1	1	1	1	1	1	1	1	1	1
A_06_P6355	|| biological process unknown || molecular function unknown || YOL161C || 1080624	1	-0.01	0.49	0.74	0.21	0.26	0.67	0.07	0.04	0.47	0.58	0.51	0.41
A_06_P4350	|| biological process unknown || lipase activity || YJR107W || 1080625	1	0.24	0.59	0.95	1.66	1.76	1.71	0.18	0.95	0.79	0.85	0.9	1.23
A_06_P7031	MDL2 || aerobic respiration || ATPase activity, coupled to transmembrane movement of substances || YPL270W || 1080626	1	0.74	0.64	1.18	1.28	1.31	0.66	-0.02	0.28	0.04	0.06	0.18	0.09
A_06_P3477	GND2 || glucose metabolism || phosphogluconate dehydrogenase (decarboxylating) activity || YGR256W || 1080627	1	3.38	5.56	6.01	4.42	5.75	5.89	0.35	0.69	3.23	3.13	4.54	5.57
A_06_P2511	EUG1 || protein folding || protein disulfide isomerase activity || YDR518W || 1080628	1	-0.22	-0.49	-1.14	-0.91	-0.98	-0.65	-0.32	0.97	0.2	0.21	-0.03	-0.32
A_06_P2222	RTN1 || biological process unknown || molecular function unknown || YDR233C || 1080629	1	-0.49	-0.3	-0.59	-0.96	-1.27	-0.89	-0.13	-0.24	-0.29	-0.55	-0.34	-0.52
A_06_P3673	SFB3 || ER to Golgi transport || molecular function unknown || YHR098C || 1080630	1	-0.06	-0.1	-0.71	-1.01	-0.78	-1.01	0.07	-0.15	-0.28	-0.21	-0.45	-0.67
A_06_P2925	PTR3 || sensory perception of chemical stimulus || amino acid binding || YFR029W || 1080631	1	0.04	-0.12	0.77	1.19	0.64	0.92	0.1	0	0.35	0.46	0.38	0.78
A_06_P6958	RPL7B || protein biosynthesis || structural constituent of ribosome || YPL198W || 1080632	1		-1.64				-1.17	-0.46	-0.37			-2.05	-1.45
A_06_P1955	CDC13 || telomere maintenance* || single-stranded DNA binding || YDL220C || 1080633	1							-0.01
A_06_P1986	NTH1 || response to stress* || alpha,alpha-trehalase activity || YDR001C || 1080634	1	2.72	3.1	3.03	2.45	1.12	1.95	0.72	0.94	2.65	2.74	2.41	2.03
A_06_P5212	CST9 || synapsis* || DNA binding || YLR394W || 1080635	1	0.61	1.22	1.98	0.66	0.05	0.02	0.06	-0.1	0.13	0.16	-0.1	-1.22
A_06_P3975	|| biological process unknown || molecular function unknown || YIL176C || 1080636	1	0.15	0.6	1.1	1.47	2.08	2.17	-0.11	0.15	0.9	0.83	0.99	1.16
A_06_P1699	|| biological process unknown || phosphoprotein phosphatase activity || YCR079W || 1080637	1	1.32	1.37	2.16	1.55	1.88	2.04	0.15	-0.5	1.11	1.27	1.28	1.4
A_06_P1085	|| biological process unknown || oxidoreductase activity, acting on the CH-OH group of donors, NAD or NADP as acceptor || YAL061W || 1080638	1	7.29	6.72	7.47	6.38	6.01	5.19	1.64	3.47	6.64	6.42	5.39	5.68
A_06_P6968	RKM1 || biological process unknown || protein-lysine N-methyltransferase activity || YPL208W || 1080639	1	-0.05	-0.77	-1.17	-0.78	-0.7	-1.26	-0.1	1.21	0.97	0.82	0.27	0.2
A_06_P6837	ATP4 || ATP synthesis coupled proton transport || structural molecule activity* || YPL078C || 1080640	1	0.81	1.16	1.77	1.38	0.79	0.2	-0.09	0.03	-0.1	-0.19	0.04	0.1
A_06_P6055	WSC2 || cell wall organization and biogenesis* || transmembrane receptor activity || YNL283C || 1080641	1	0.42	-0.45	-0.82	-0.95	-1.45	-2.12	-0.06	0.9	0.44	0.86	0.78	0.28
A_06_P4807	MHT1 || sulfur amino acid metabolism || homocysteine S-methyltransferase activity || YLL062C || 1080643	1	1.3	3	2.31	1.85	0.65	1.62	0.76	0.52	0.98	0.62	-0.43	-1
A_06_P6688	FRT1 || response to stress || molecular function unknown || YOR324C || 1080644	1	0.02	-0.54	-0.1	0.31	0.65	0.3	0.17	-0.33	0.47	0.61	0.01	-0.42
A_06_P1952	TIM22 || mitochondrial inner membrane protein import || protein transporter activity || YDL217C || 1080645	1	-0.62	-0.65	-0.97	-1.21	-1.73	-1.77	-0.32	-0.62	-0.87	-1.07	-1.22	-1.43
A_06_P2802	ADK2 || nucleotide metabolism || adenylate kinase activity || YER170W || 1080646	1	0.74	0.64	2.09	0.3	-0.22		0.41	0.1	0.12	0.08	-0.64	-0.84
A_06_P2370	LSM6 || nuclear mRNA splicing, via spliceosome* || RNA binding || YDR378C || 1080647	1	0.08	-0.28	-1.09	0.17	0.12	0	-0.25	1.48	0.1	0	0.19	0.35
A_06_P2996	|| || || YGL041C || 1080648	1	0.22		0.69								0.02
A_06_P6554	|| transport || transporter activity || YOR192C || 1080649	1	-0.45		0.67				-0.32
A_06_P1285	CHS2 || cytokinesis || chitin synthase activity || YBR038W || 1080650	1	0.34	0.19	-0.79	-1.12	-0.91	-1.93	0.16	-0.08	0.62	0.98	0.12	-0.08
A_06_P4311	RFC2 || mismatch repair* || DNA clamp loader activity* || YJR068W || 1080651	1	-0.53	-0.65	-0.77	-0.39	-0.55	-0.24	-0.19	-0.19	-0.8	-0.75	-0.78	-0.91
A_06_P4764	KNS1 || protein amino acid phosphorylation || protein serine/threonine kinase activity* || YLL019C || 1080652	1	1.51	1.36	2.67	2.07	2.21	2.35	0.36	-0.75	1.25	1.39	1.28	1.31
A_06_P5090	SMD2 || nuclear mRNA splicing, via spliceosome || RNA splicing factor activity, transesterification mechanism || YLR275W || 1080653	1	-1.03	-0.92	-0.53	0.03	0.27	-0.08	-0.49	-0.5	-0.6	-0.54	-0.36	-0.76
A_06_P5578	TIF34 || translational initiation || translation initiation factor activity || YMR146C || 1080654	1	-0.64	-0.83	-2.21	-2.01	-2.05	-1.46	-0.4	-0.1	-1.73	-1.91	-1.34	-1.28
A_06_P5776	MRP7 || protein biosynthesis || structural constituent of ribosome* || YNL005C || 1080655	1	0.66	0.92	0.89	0.51	0.92	0.29	0.21	0.18	0.07	0.11	0	0.15
A_06_P4230	NUC1 || DNA recombination* || ribonuclease activity* || YJL208C || 1080656	1	-3.16	-2.74	-3.34	-2.96	-1.88	-3.54	-0.27	-0.53	-3.4	-3.17	-1.92	-1.33
A_06_P3687	|| sulfur metabolism || cystathionine beta-lyase activity || YHR112C || 1080657	1	0.09	0.77	0.39	0.44	0.25	0.44	0.4	0.22	1.55	1.66	0.62	0.33
A_06_P1627	|| || || YCR006C || 1080658	1				2.21
A_06_P2907	|| biological process unknown || molecular function unknown || YFR012W-A || 1080659	1
A_06_P1659	FEN1 || vesicle-mediated transport* || fatty acid elongase activity || YCR034W || 1080660	1	-1.17	-2.24	-3.89	-3.81	-3.79	-3.84	-0.14	0.02	-2	-2.07	-1.75	-2.21
A_06_P1421	PEX32 || peroxisome organization and biogenesis || molecular function unknown || YBR168W || 1080661	1	0.74	0.52	1.18	2.51	2.45	1.94	-0.56	0.8	0.97	0.74	0.66	0.19
A_06_P3189	SEC15 || cytokinesis* || protein binding || YGL233W || 1080662	1	0.91	0.66	0.95	1.17	1.5	0.78	0.17	0.57	1.01	1.11	0.79	0.77
A_06_P3230	NMA2 || NAD metabolism || nicotinate-nucleotide adenylyltransferase activity || YGR010W || 1080663	1	0.24	0.29	0.81	1.23	-0.1	0.91	-0.27	-0.23	0.04	0.14	-0.26	-1.04
A_06_P6742	|| biological process unknown || molecular function unknown || YOR378W || 1080664	1	-0.71	-1.18	-1.18	-1.13		-1.06	-0.82	0.44	-0.18	-0.34	-1.24
A_06_P2646	SRB4 || transcription from RNA polymerase II promoter || RNA polymerase II transcription mediator activity || YER022W || 1080665	1	0.45	0.37	0.58	0.26	0.1	-0.23	0.27	0.39	0.2	0.24	-0.08	-0.63
A_06_P2657	ZRG8 || biological process unknown || molecular function unknown || YER033C || 1080666	1			2.88	1.88	1.15	1.62	0.88	0.87	1.99	2.17	1.75	1.1
A_06_P1796	COX9 || aerobic respiration* || cytochrome-c oxidase activity || YDL067C || 1080667	1	0.89	0.99	1.91	1.45	2.03	1.18	0.22	0.06	0.87	0.91	0.89	1.31
A_06_P4581	KKQ8 || biological process unknown || protein kinase activity || YKL168C || 1080668	1	1.64	1.47	1.87	2.08	2.07	2.15	0.2	0.65	1.5	1.51	1.37	1.11
A_06_P6133	MRPL50 || protein biosynthesis || structural constituent of ribosome || YNR022C || 1080669	1	0.2	1.14	0.65	1.03	0.87	-0.14	0.05	1.26	0.19	0.02	-0.09	-0.59
A_06_P2212	CRF1 || negative regulation of transcription || transcriptional repressor activity || YDR223W || 1080670	1								0.04			1.75	1.74
A_06_P7149	RPL11A || protein biosynthesis* || structural constituent of ribosome || YPR102C || 1080671	1	-1.36	-1.82	-4.25	-4.36	-3.77	-2.35	-0.63	-0.04	-2.21	-3.38	-2.36	-1.57
A_06_P2850	EPL1 || regulation of transcription from RNA polymerase II promoter* || histone acetyltransferase activity || YFL024C || 1080672	1	-0.24	0.24	0.74	-0.08	-0.11	0.91	0.04	-0.69	-0.15	0.2	0.05	-0.15
A_06_P2350	VID21 || chromatin modification || molecular function unknown || YDR359C || 1080673	1	-0.19	0.46	0.51	0.23	-0.25	0.8	0.09	-0.73	-0.32	-0.26	-0.38	-0.44
A_06_P4194	CPS1 || proteolysis and peptidolysis* || Gly-X carboxypeptidase activity || YJL172W || 1080674	1	-1.44	-0.82	-2.17	-4.75	-2.9	-2.33	1.24	-2.51	0.06	0.04	-1.04	-0.3
A_06_P2516	SPS1 || protein amino acid phosphorylation* || protein serine/threonine kinase activity || YDR523C || 1080675	1		-0.89	-1.14	-0.78		-0.38	-0.29	-0.33	-0.7	-0.48	0.18	0.11
A_06_P5404	BUL2 || protein monoubiquitination* || molecular function unknown || YML111W || 1080677	1	-0.28	-0.04	-0.41	-0.66	-0.06	-0.67	0.27	-0.1	0.45	0.46	0.26	0.35
A_06_P6076	YPT11 || mitochondrion inheritance || GTPase activity || YNL304W || 1080678	1	0.31	-0.07	0.46	0.43	-0.32	-0.12	0.13	0.6	0.57	0.46	0.2	0.35
A_06_P4914	|| || || YLR101C || 1080679	1	0.25		-0.44				-0.2
A_06_P4638	VPS1 || protein-vacuolar targeting* || GTPase activity || YKR001C || 1080680	1	0.55	0.74	0.42	0.23	0.05	-0.56	0.33	1.08	1.01	0.91	0.67	0.33
A_06_P2816	|| biological process unknown || molecular function unknown || YER184C || 1080681	1	0.15	-0.32	0.33	0.13	-0.47	0.09	0.14	-0.6	-0.34	-0.14	-0.13	-0.19
A_06_P5719	CAT8 || positive regulation of transcription from RNA polymerase II promoter* || specific RNA polymerase II transcription factor activity || YMR280C || 1080682	1	5.04	4.55	6.2	5.42	5.45	5.5	0.76	1.46	2.69	2.58	2.48	2.34
A_06_P5255	|| biological process unknown || molecular function unknown || YLR437C || 1080683	1	-0.26	-0.45	-1	-2.06	-1.92	-1.62	0.19	-0.9	1.23	1.21	0.54	-0.26
A_06_P5761	DIA1 || pseudohyphal growth* || molecular function unknown || YMR316W || 1080684	1	-0.23	-0.55	-0.54	-0.06	0.04	-0.28	-0.15	1.2	0.98	0.72	1.64	2.1
A_06_P1748	RPN4 || ubiquitin-dependent protein catabolism* || transcriptional activator activity || YDL020C || 1080685	1	1.17	1.61	2.47	3.61	4.38	3.82	0.19	1.81	2.14	2.27	2.92	3.79
A_06_P2280	|| biological process unknown || helicase activity || YDR291W || 1080686	1	-0.14	0.06	0.02	-0.05	-0.49	0.02	-0.15	-0.25	-0.67	-0.53	-0.55	-0.43
A_06_P6147	|| biological process unknown || molecular function unknown || YNR034W-A || 1080687	1	5.96	7.09	8.02	6.64	6.64		0.15
A_06_P3121	CUP2 || transcription initiation from RNA polymerase II promoter* || ligand-regulated transcription factor activity || YGL166W || 1080688	1	0.46	-0.14	1.15	1.29	0.6	0.7	-0.13	-0.01	0.26	0.08	0.49	0.77
A_06_P1637	|| biological process unknown || molecular function unknown || YCR016W || 1080689	1	-2.94	-3.23	-4.28	-3.39	-3.53	-4.02	-0.3	-0.85	-4.21	-3.92	-2.26	-1.99
A_06_P6659	MBF1 || positive regulation of transcription from RNA polymerase II promoter || transcription coactivator activity || YOR298C-A || 1080690	1	1.45	2.52	2.73	0.33	1.24	2.12	0.92	-0.77	0.72	0.81	1.1	1.65
A_06_P1772	MTF2 || protein biosynthesis* || RNA binding || YDL044C || 1080691	1	0.14	0.36	0.76	0.63	0.8	0.17	-0.32	0.32	0.09	0.14	0.08	0.2
A_06_P4788	FPS1 || transport* || transporter activity* || YLL043W || 1080692	1	0.41	0.35	0.77	1.66	1.93	2.1	0.01	0.48	0.42	0.37	0.88	1.22
A_06_P5945	MDG1 || signal transduction during conjugation with cellular fusion || molecular function unknown || YNL173C || 1080693	1	2.7	2.56	3.36	2.48	2.37	1.94	0.51	0.58	1.95	2.32	1.79	1.5
A_06_P4664	|| biological process unknown || molecular function unknown || YKR027W || 1080694	1	-0.41	-0.1	-0.25	-0.26		-1.61	-0.11	0.03	0.3	0.39	-0.19	-0.69
A_06_P2897	YPI1 || protein amino acid dephosphorylation* || protein phosphatase inhibitor activity || YFR003C || 1080695	1	1.92	1.59	1.16	1.42	0.85	0.84	0.26	1.62	2.32	2.19	1.69	1.17
A_06_P6270	AVO1 || regulation of cell growth || molecular function unknown || YOL078W || 1080696	1	-0.32	-0.04	0.19	-0.27	-0.13	0	0.22	-0.56	-0.3	-0.01	-0.09	0.2
A_06_P2951	HXK1 || glucose metabolism* || hexokinase activity || YFR053C || 1080697	1	7.28	6.62	5.46	4.17	3.14	3.68	1.06	3.42	4.21	3.96	4.27	3.05
A_06_P7161	|| biological process unknown || molecular function unknown || YPR114W || 1080698	1	-0.33	-0.24	-1.09	-1.74	-1.2	-1.66	-0.07	0.09	-0.14	0.03	-0.08	-0.27
A_06_P3226	PRP18 || nuclear mRNA splicing, via spliceosome || protein binding* || YGR006W || 1080699	1							0.09	-0.16			-0.26
A_06_P1535	|| biological process unknown || molecular function unknown || YBR281C || 1080700	1	0.12	0.34	-0.33	0.07	-0.51	-0.47	-0.31	1.22	0.58	0.35	-0.21	-0.13
A_06_P3469	SOL4 || pentose-phosphate shunt, oxidative branch || 6-phosphogluconolactonase activity || YGR248W || 1080701	1	6.87	7.28	7.94	6.51	6.64	6.37	1.36	4.04	6.54	6.35	5.34	5.85
A_06_P2217	PCF11 || mRNA polyadenylylation* || protein binding || YDR228C || 1080702	1	0.13	0.24	0.64	0.68	0.68	0.43	0.06	0.58	-0.11	0	0.06	0.08
A_06_P7122	OPY2 || cell cycle arrest in response to pheromone || molecular function unknown || YPR075C || 1080703	1	-0.07	0.83	0.97	-0.35	0.82	1.04	0.33	-1.91	0.06	0.1	0.22	0.68
A_06_P2100	|| || || YDR112W || 1080704	1			0.24
A_06_P5565	|| iron ion homeostasis || molecular function unknown || YMR134W || 1080705	1	0.4	0.07	0.36	0.39	0.55	-0.54	0.15	0.36	0.52	0.58	0.53	0.76
A_06_P6121	CSE2 || transcription from RNA polymerase II promoter* || RNA polymerase II transcription mediator activity || YNR010W || 1080706	1	0.5	0.23	0.66	0.83	0.32	0.26	-0.31	0.73	1.27	1.02	0.59	0.43
A_06_P1652	RHB1 || L-arginine transport* || GTPase activity || YCR027C || 1080707	1	0.2	-0.55	-0.61	-0.5	-0.67	-1.01	-0.09	0.48	0.36	0.1	-0.38	-0.87
A_06_P1383	CCZ1 || protein-vacuolar targeting* || guanyl-nucleotide exchange factor activity || YBR131W || 1080708	1	-1.05	-0.67	-0.24	0.29	0.99	0.42	-0.33	-0.45	-0.46	-0.13	0.14	0.81
A_06_P4444	UGP1 || protein amino acid glycosylation* || UTP-glucose-1-phosphate uridylyltransferase activity || YKL035W || 1080709	1	3.69	3.87	1.51	0.42	0.54	0.7	0.74	0.45	2.14	1.72	1.85	1.24
A_06_P6110	YRF1-6 || telomerase-independent telomere maintenance || DNA helicase activity || YNL339C || 1080710	1	0.82	0.34	0.58	0.38	1.54	1.85	0.03	-0.38	0.26	0.27	0.66	1.97
A_06_P3770	|| biological process unknown || molecular function unknown || YHR192W || 1080711	1	0.15	0.1	0.17	0.32	0.11	0.32	-0.02	0.27	0.4	0.4	0.18	-0.13
A_06_P5843	RNH201 || DNA replication || ribonuclease H activity || YNL072W || 1080712	1	-0.64	-1.5	-1.84	-1.64	-2.09	-1.42	-0.18	-0.02	-0.54	-0.56	-0.64	-0.67
A_06_P5775	HRB1 || poly(A)+ mRNA-nucleus export || RNA binding || YNL004W || 1080713	1	-0.67	-0.44	-0.84	-0.79	-1.72	-1.07	-0.33	-0.32	-1.14	-1.03	-1.12	-1.04
A_06_P4255	TDH2 || glycolysis* || glyceraldehyde-3-phosphate dehydrogenase (phosphorylating) activity || YJR009C || 1080714	1	-0.31	-0.32	-2.12	-1.88	-2.01	-0.26	0.34	-0.43	-0.99	-1.51	-0.55	-0.48
A_06_P4504	YJU3 || biological process unknown || serine hydrolase activity || YKL094W || 1080715	1	1.06	1.1	1.13	1.55	0.61	0.67	-0.03	0.55	1.2	1.25	1.13	0.37
A_06_P6081	STB1 || G1/S transition of mitotic cell cycle || transcriptional activator activity || YNL309W || 1080716	1	-1.15	-0.89	-0.75	-1.69		-1.14	0.32	-1.25	-0.69	-0.52	-0.98	-1.25
A_06_P2755	GLO3 || ER to Golgi transport* || ARF GTPase activator activity || YER122C || 1080717	1	-0.41	-0.11	-0.84	-1.43	-0.91	-1.22	0.14	-0.64	-0.23	-0.06	-0.52	-0.62
A_06_P3009	ERV14 || ER to Golgi transport* || molecular function unknown || YGL054C || 1080718	1	-0.32	-0.31	0.23	-0.95	0.27	-0.44	0.91	-0.93	-0.25	-0.06	-0.5	-0.2
A_06_P4891	SIC1 || G1/S transition of mitotic cell cycle* || protein binding* || YLR079W || 1080719	1	1.06	0.7	1.29	1.19	0.86	0.72	0.11	0.57	0.89	0.89	0.56	0.63
A_06_P1025	VPS8 || late endosome to vacuole transport || molecular function unknown || YAL002W || 1080720	1	0.53	0.87	1.13	0.67	1.12	1.51	0.14	0.08	0.64	1	0.79	1
A_06_P1254	|| biological process unknown || molecular function unknown || YBR007C || 1080721	1	-1.03	-1.51	-2.86	-3.05		-3.23	-0.57	-0.24	0.57	0.8	0.26	-0.02
A_06_P7231	DPM1 || protein amino acid N-linked glycosylation* || transferase activity, transferring glycosyl groups* || YPR183W || 1080722	1	0.2	0.21	-0.44	-1.01	-1.23	-0.56	-0.09	0.27	-0.34	-0.6	-0.49	-0.51
A_06_P3139	STR3 || methionine biosynthesis || cystathionine beta-lyase activity || YGL184C || 1080723	1	-1.41	0.51	-0.45	0.78	1.61	1.86	0.26	-0.94	-0.16	-0.88	0.11	1.26
A_06_P1517	SHM1 || one-carbon compound metabolism || glycine hydroxymethyltransferase activity || YBR263W || 1080724	1	-1.15	-1.28	-2.03	-1.1	-0.19	-0.13	-0.23	-0.67	-1.27	-1.36	-0.81	-0.78
A_06_P6119	LRO1 || triacylglycerol biosynthesis* || phospholipid:diacylglycerol acyltransferase activity || YNR008W || 1080725	1	-0.29	0.15	0.09	-1.57	-1.09	-1.12	0.55	-1.33	-0.65	-0.39	-0.64	-0.22
A_06_P6719	GDS1 || aerobic respiration || molecular function unknown || YOR355W || 1080726	1	-1.27	-0.61	-1.59	-1.33	-1.68	-0.15	-0.18	-1.01	-0.96	-0.48	-0.56	-0.87
A_06_P5279	|| biological process unknown || molecular function unknown || YLR460C || 1080727	1	-0.94	-0.95	-0.9	-1.18	-0.47	-0.5	0.1	-0.51	0.15	0.4	0.19	0.37
A_06_P6886	HHO1 || regulation of transcription, DNA-dependent* || DNA binding || YPL127C || 1080728	1	0.29	0.48	0.1	-0.63	-0.85	-0.51	0.31	-0.7	0.9	1.12	0.75	-0.01
A_06_P2638	FAA2 || lipid metabolism* || long-chain-fatty-acid-CoA ligase activity || YER015W || 1080729	1	1.07	0.99	3.11	5.57	5.76	5.18	-0.23	-0.29	0.31	0.27	1.53	1.74
A_06_P5436	|| methionine salvage || oxidoreductase activity, acting on single donors with incorporation of molecular oxygen, incorporation of two atoms of oxygen || YMR009W || 1080730	1	0.8	1.46	1.28	2.4	1.88	2.14	0.07	1.41	1.23	0.91	0.68	0.87
A_06_P1822	SRP14 || protein-ER targeting* || signal sequence binding || YDL092W || 1080731	1	0	-0.58	-1.2	0.05	-0.04	-0.88	-0.39	1.4	-0.03	-0.08	-0.63	-0.34
A_06_P6841	MOT1 || regulation of transcription from RNA polymerase II promoter || ATPase activity || YPL082C || 1080732	1	-1.17	-0.82	-0.75	-0.41	-0.26	-0.1	-0.09	-0.52	-1.06	-0.49	0.09	0.99
A_06_P2917	ROG3 || biological process unknown || molecular function unknown || YFR022W || 1080733	1	1.18	1.41	2.08	1.35	1.33	1.36	0.63	0.47	1.58	2.03	1.49	2.1
A_06_P6109	|| || || YNL337W || 1080734	1
A_06_P4293	ISY1 || nuclear mRNA splicing, via spliceosome || RNA splicing factor activity, transesterification mechanism || YJR050W || 1080736	1	0.35	0.44	1.21	0.3	0.46	0.65	0.19	-1.08	-0.37	-0.29	-0.3	-0.05
A_06_P2857	HAC1 || regulation of transcription from RNA polymerase II promoter* || transcription factor activity* || YFL031W || 1080737	1	-1.1	0.87	2.41	-3.59	-3.36	-2.8	3.09	-3.94	-3.14	-2.27	-2.25	-2.15
A_06_P5674	RNA1 || rRNA-nucleus export* || Ran GTPase activator activity || YMR235C || 1080738	1	-0.44	-0.91	-1.76	-1.2	-1.67	-1.8	-0.48	0.83	-0.25	-0.48	-0.56	-0.63
A_06_P6363	YSP3 || protein catabolism || peptidase activity || YOR003W || 1080739	1	1.4	1.36	1.94	1.12	1.54	0.71	0.76	0.17	3.78	3.91	3.01	2.9
A_06_P2404	DFM1 || biological process unknown* || molecular function unknown || YDR411C || 1080740	1	0.25	0.6	0.68	1.01	-0.04	0.64	-0.08	0.4	0.95	0.93	0.65	-0.22
A_06_P7200	|| biological process unknown || molecular function unknown || YPR152C || 1080741	1	-0.45	-0.44	0.36	-0.43	-0.68	-0.42	0.09	-1.63	-0.77	-0.24	-0.77	-0.17
A_06_P1523	|| biological process unknown || molecular function unknown || YBR269C || 1080742	1	1.77	2.22	3.04	2.76	2.61	2.79	0.45	0.52	1.56	1.59	1.67	1.58
A_06_P5064	SSP120 || protein secretion || molecular function unknown || YLR250W || 1080743	1	1.05	0.95	1.45	1.54	1.5	1.1	0.05	0.88	1.17	1.07	0.63	0.66
A_06_P5364	HMG1 || ergosterol biosynthesis || hydroxymethylglutaryl-CoA reductase (NADPH) activity || YML075C || 1080744	1	-0.56	-0.21	0.56	1.24	0.56	0.47	0	-0.34	-0.11	-0.02	-0.06	-0.24
A_06_P5366	BET5 || ER to Golgi transport || molecular function unknown || YML077W || 1080745	1	-0.64	-0.56	-1.05	-0.84	-0.67	-0.99	-0.08	0.74	0.35	0.34	0.08	-0.36
A_06_P1649	PMP1 || cation transport || enzyme regulator activity || YCR024C-A || 1080747	1	-1.35	-0.84	-2.15	-2.44	-1.73	-1.95	-0.69	-1.29	0.61	0.82	0.73	0.25
A_06_P1165	POL12 || DNA replication initiation* || alpha DNA polymerase activity || YBL035C || 1080748	1	-1.88	-2.01	-3.19	-2.19	-1.26	-1.28	-0.08	0.21	-0.74	-1.01	-0.95	-0.37
A_06_P2970	|| biological process unknown || molecular function unknown || YGL015C || 1080749	1			-0.66					-0.12
A_06_P3428	|| biological process unknown || molecular function unknown || YGR207C || 1080750	1	0.05	-0.08	-1.23	-1.01	-0.94	-2.44	-0.24	1.54	0.79	0.48	0.05	-0.34
A_06_P2888	COS4 || biological process unknown || molecular function unknown || YFL062W || 1080751	1	0.92	1.19	1.33	0.96	1.06	0.33	0.32	0.6	1.36	1.34	1.52	1.83
A_06_P1906	|| || || YDL172C || 1080752	1								-0.66				-0.72
A_06_P6271	|| || || YOL079W || 1080753	1	0.69	-0.29	-0.8				0.29
A_06_P6883	SPC29 || microtubule nucleation* || structural constituent of cytoskeleton || YPL124W || 1080754	1	-0.46	-0.97	-1.34	-1.13		-1.2	0.1	0.34	0.54	0.64	0.35	-0.12
A_06_P2139	CTH1 || transcription* || transcription factor activity || YDR151C || 1080755	1	0.37	0.23	1.06	0.95	1.09	0.34	0.18	0.44	0.86	0.69	0.47	0.15
A_06_P6269	ATP19 || ATP synthesis coupled proton transport || hydrogen-transporting ATP synthase activity, rotational mechanism || YOL077W-A || 1080756	1	0.67	1.81	1.64	1.36	2.12	0.78	0.13	1.58	0.66	0.66	1.13	1.21
A_06_P3232	|| biological process unknown || cysteine synthase activity || YGR012W || 1080757	1	-0.03	-0.28	-0.16	0.38	-0.68	-0.56	-0.21	0.47	-0.08	-0.14	-0.42	-0.95
A_06_P3744	CDC23 || mitotic sister chromatid segregation* || protein binding* || YHR166C || 1080758	1	0.02	0.01	0.17	1.3	0.8	0.59	-0.13	0.93	0.77	0.87	0.71	0.33
A_06_P2826	MSH4 || meiotic recombination || DNA binding || YFL003C || 1080759	1			-0.21						-0.15
A_06_P5644	PFK2 || glycolysis || 6-phosphofructokinase activity || YMR205C || 1080760	1	-0.26	-0.1	-1.84	-2.06	-2.26	-1.52	0	-0.94	-0.92	-0.84	-0.69	-0.68
A_06_P5948	|| biological process unknown || molecular function unknown || YNL176C || 1080761	1	0.25	-0.11	-0.02	0.41	0.28	0.48	-0.16	0.16	0.53	0.65	0.6	0.78
A_06_P1024	TFC3 || transcription initiation from RNA polymerase III promoter || RNA polymerase III transcription factor activity || YAL001C || 1080763	1	0.83	0.93	1.52	1.63	1.32	1.47	0.4	0.63	0.88	1.15	0.93	0.67
A_06_P5783	SPO1 || meiosis || phospholipase activity || YNL012W || 1080764	1		1.39	1.37	2.27		3.75	0.03	0.11			0.84	1.78
A_06_P1987	YRB1 || ubiquitin-dependent protein catabolism* || Ran GTPase binding || YDR002W || 1080765	1	0.05	-0.41	-2	-2.44	-1.85	-2.51	-0.04	-0.32	-0.32	-0.54	-0.36	-0.01
A_06_P4395	DAN4 || biological process unknown || molecular function unknown || YJR151C || 1080766	1	1.5	1.66	2.8	2.7	3.32	3.37	0.36	0.81	1.61	1.42	1.59	1.39
A_06_P6809	MNN9 || protein amino acid N-linked glycosylation || mannosyltransferase activity || YPL050C || 1080767	1	-1.34	-1.22	-1.77	-1.74	-2.56	-1.81	0.09	-0.23	-1.26	-1.13	-1.18	-1.52
A_06_P5900	NRK1 || nicotinamide riboside metabolism || nicotinamide riboside kinase activity || YNL129W || 1080768	1	-1.62	-2.01	-3.75	-3.17	-3.01	-3.4	0.23	0.8	2.31	2.39	1.49	0.71
A_06_P3625	CIC1 || ribosomal large subunit biogenesis* || protein binding, bridging || YHR052W || 1080769	1	-5.25	-3.9	-5.29	-4.73	-3.84	-3.39	-0.48	-2.09	-6.08	-6.19	-3.67	-3.03
A_06_P4639	PAP1 || mRNA-nucleus export* || polynucleotide adenylyltransferase activity || YKR002W || 1080770	1	0.56	0.69	1.03	0.29	0.26	0.18	0.22	-0.32	-0.04	-0.12	-0.32	-0.78
A_06_P3270	|| || || YGR050C || 1080771	1
A_06_P7156	|| biological process unknown || molecular function unknown || YPR109W || 1080772	1	0.96	0.94	1.57	1.56	1.37	0.83	-0.15	0.43	0.56	0.67	0.48	0.57
A_06_P4477	YNK1 || purine nucleotide biosynthesis* || nucleoside diphosphate kinase activity || YKL067W || 1080773	1	1.8	2.67	2.15	1.53	1.79	0.33	0.19	0.39	1.15	1.12	1.74	1.79
A_06_P1528	CHK1 || protein amino acid phosphorylation* || protein kinase activity || YBR274W || 1080774	1	0.37	0.14	0.62	1.25	1.24	0.67	0.02	0.55	0.6	0.44	0.22	0.28
A_06_P6346	|| biological process unknown || molecular function unknown || YOL153C || 1080775	1		3.69	4.91	4.54	3.88		0.61	2.62	3.46	2.77	3.16
A_06_P5002	MDL1 || oligopeptide transport || ATPase activity* || YLR188W || 1080776	1	-0.84	-0.87	-1.16	-1.46	-1.65	-1.15	0.19	-0.65	-0.85	-0.61	-0.4	-0.5
A_06_P3849	DFG10 || pseudohyphal growth || molecular function unknown || YIL049W || 1080777	1	-0.26	0.28	-0.04	0.95	0.59	0.05	-0.21	1.8	1.02	0.76	0.58	-0.17
A_06_P4748	ORC3 || DNA replication initiation* || DNA replication origin binding || YLL004W || 1080778	1	-1.34	-0.84	-1.09	-1.2	-1.62	-1.95	-0.17	-0.36	-0.33	0.04	-0.27	-0.18
A_06_P4754	PSR1 || response to stress || phosphoprotein phosphatase activity || YLL010C || 1080779	1	-0.35	0.32	0.85	-0.78	-0.85	-0.39	0.38	-1.74	-0.46	-0.43	-0.56	-1.26
A_06_P2883	AAD16 || aldehyde metabolism || aryl-alcohol dehydrogenase activity || YFL057C || 1080780	1	-0.05	0.24	1.51	1.52	1.21	1.99	-0.05	-0.44	-0.24	0.11	0.66	1.77
A_06_P1132	HTA2 || DNA repair* || DNA binding || YBL003C || 1080781	1	0.93	-0.95	-2.25	-1.18	-1.88	-0.66	-0.75	1.63	0.69	0.57	0.01	-0.34
A_06_P6015	SLA2 || cell wall organization and biogenesis* || protein binding, bridging || YNL243W || 1080782	1	0.55	0.99	0.7	0.43	-0.57	0.24	0.26	0.37	0.54	0.72	0.6	0.3
A_06_P2827	VTC2 || vacuole fusion, non-autophagic* || molecular function unknown || YFL004W || 1080783	1	0.1	-0.02	-0.17	-0.14	-0.56	-0.57	0.28	0.06	0.71	0.77	0.31	-0.13
A_06_P4887	RPL10 || protein biosynthesis* || structural constituent of ribosome || YLR075W || 1080784	1	0.06	-0.69	-4.41	-4.21	-4.01	-1.08	0.1	-0.31	-2.41		-2.71	-1.28
A_06_P5592	MRPS8 || protein biosynthesis || structural constituent of ribosome || YMR158W || 1080785	1	0.72	1.13	0.18	0.49	0.97	-0.18	-0.45	1.57	0.75	0.5	0.32	0.6
A_06_P5833	|| biological process unknown || S-adenosylmethionine-dependent methyltransferase activity || YNL063W || 1080786	1	0.42	0.83	1.17	1.88	0.83	1.07	-0.13	0.72	0.64	0.65	0.96	1.2
A_06_P4982	|| biological process unknown || molecular function unknown || YLR168C || 1080787	1	0.75	0.44	1.1	0.13	-0.24	-0.89	0.26	0.62	-0.45	-0.29	0.03	-0.22
A_06_P2635	PRP22 || U2-type spliceosome disassembly || RNA splicing factor activity, transesterification mechanism* || YER013W || 1080789	1	0.02	0.05	0.56	0.64	0.76	0.68	0.29	-0.17	0.37	0.42	0.25	0.43
A_06_P5897	SPC98 || mitotic spindle organization and biogenesis in nucleus* || structural constituent of cytoskeleton || YNL126W || 1080790	1	-0.76	-1.12	-1.35	-0.76	-0.68	-0.58	0.14	-0.1	-0.12	0.54	0.48	0.2
A_06_P6412	|| || || YOR050C || 1080791	1		-0.1	-0.58				0.16			-0.9	-0.67
A_06_P4838	SED5 || ER to Golgi transport* || t-SNARE activity || YLR026C || 1080792	1	0.16	-0.25	-0.54	-1.67	-0.98	-1.91	-0.06	-0.43	-0.56	-0.41	-0.29	0.1
A_06_P5819	ALG11 || protein amino acid glycosylation || alpha-1,2-mannosyltransferase activity || YNL048W || 1080793	1	-0.33	-0.3	-0.15	-0.44	-0.13	-0.43	0.01	-0.5	-0.43	-0.21	-0.39	-0.61
A_06_P1750	GPD1 || intracellular accumulation of glycerol || glycerol-3-phosphate dehydrogenase (NAD+) activity || YDL022W || 1080794	1	3.37	3.35	2.92	3	2.74	2.84	0.42	2.39	3.11	2.91	2.81	2.48
A_06_P5840	RPL16B || protein biosynthesis || structural constituent of ribosome* || YNL069C || 1080795	1	-0.98	-1.66	-4.99	-4.91	-4.97	-2.87	0.16	-0.28	-3.77	-5.26	-3.75	-2.27
A_06_P5580	|| biological process unknown || molecular function unknown || YMR148W || 1080796	1	0.82	1.27	1.7	1.72	1.3	1.53	-0.04	0.05	1.18	1.13	1.06	0.71
A_06_P5641	ERG2 || ergosterol biosynthesis || C-8 sterol isomerase activity || YMR202W || 1080797	1	-0.63	-0.66	-2.53	-1.84	-2.18	-2.32	-0.61	0.85	0.42	0.42	0.31	0.22
A_06_P5500	|| biological process unknown || molecular function unknown || YMR073C || 1080798	1	0.19	-0.09	0.25	1.04	1.06	0.31	0.36	0.84	0.77	0.59	0.56	0.52
A_06_P4344	RSM26 || protein biosynthesis || structural constituent of ribosome || YJR101W || 1080799	1	0.34	0.86	0.41	0.21	-0.29	-0.97	-0.02	0.78	-0.52	-0.7	-0.72	-0.92
A_06_P5022	SEC13 || ER to Golgi transport* || structural molecule activity || YLR208W || 1080800	1	-0.2	-0.3	-0.97	-0.87	-0.95	-0.9	-0.13	-0.19	-0.19	-0.37	-0.37	-0.69
A_06_P4279	HUL4 || protein monoubiquitination* || ubiquitin-protein ligase activity || YJR036C || 1080801	1	3.08	2.83	3.52	3.78	4.27	3.5	0.45	1.4	2.9	2.46	1.85	2.16
A_06_P2017	PST2 || biological process unknown || molecular function unknown || YDR032C || 1080802	1	1.8	2.94	1.89	2.38	2.04	2.51	-0.1	0.55	1.51	1.46	1.57	1.63
A_06_P2628	|| biological process unknown || RNA binding || YER007C-A || 1080803	1	-1.14	-0.85	-1.74	-2.13	-1.92	-1.74	0.11	-0.87	-1.21	-1.24	-1.19	-1.49
A_06_P5278	GAB1 || attachment of GPI anchor to protein || GPI-anchor transamidase activity || YLR459W || 1080805	1	-0.75	-0.56	-1.07	0.25	-1.06	-0.35	-1.23	0.39	0.58	0.27	0.45	-0.89
A_06_P1133	UTP20 || 35S primary transcript processing || snoRNA binding || YBL004W || 1080807	1	-1.89	-3	-3.89	-2.3	-1.93	-0.86	-0.01	-1.2	-4.24	-3.91	-1.69	-0.84
A_06_P1841	RRP42 || 35S primary transcript processing* || 3'-5'-exoribonuclease activity || YDL111C || 1080808	1	-0.99	-1.38	-1.3	-0.53	-1.01	-1.6	-0.47	0.38	-1.07	-1.32	-1.18	-1.56
A_06_P6835	GPI2 || GPI anchor biosynthesis || UDP-glycosyltransferase activity || YPL076W || 1080809	1	-1.07	-0.67	-1.23	-0.21		-0.29	-0.15	-0.26	-0.65	-0.73	-0.58	-1.39
A_06_P3875	RPN2 || ubiquitin-dependent protein catabolism || endopeptidase activity* || YIL075C || 1080810	1	0.63	1.31	0.96	0.14	0.21	0.38	0.93	0.65	0.22	0.25	-0.13	0.24
A_06_P5581	SWP1 || protein amino acid N-linked glycosylation || dolichyl-diphosphooligosaccharide-protein glycotransferase activity || YMR149W || 1080811	1	-0.27	-0.41	-0.8	-0.83	-1.97	-1.35	0.11	-0.01	-0.47	-0.44	-0.33	-0.94
A_06_P3859	|| || || YIL059C || 1080813	1	-0.11	-0.17	1.23	2.02	2.07	1.68	-0.28	-0.28	0.44	0.46	0.59	1.15
A_06_P1370	TEF2 || translational elongation || translation elongation factor activity || YBR118W || 1080814	1	0.28	0.57	-2.94	-1.36	-2.04	0.47	0.54	-1.24	-0.6	-2.22	-0.72	-0.6
A_06_P6695	|| || || YOR331C || 1080815	1	0.92	0.02	-0.48	-1.15	-0.64	-1.13	0.38	-0.22	-0.12	0.37	-0.53	-0.55
A_06_P2634	PRE1 || response to stress* || endopeptidase activity || YER012W || 1080817	1	0.61	0.63	0.32	0.66	0.79	0.25	0.26	1.35	1.15	1.06	0.49	0.17
A_06_P2679	HOM3 || methionine metabolism* || aspartate kinase activity || YER052C || 1080818	1	-2.7	-1.06	-2.91	-2.57	-2.25	-2.38	-0.07	0.15	-3.05	-3.49	-2.45	-2.01
A_06_P3891	|| biological process unknown || molecular function unknown || YIL092W || 1080819	1	-1.55	-0.89	-0.57	-0.38	-0.95	-0.1	-0.17	-1.02	-0.97	-0.77	-0.89	-0.86
A_06_P5228	VIP1 || actin cytoskeleton organization and biogenesis || molecular function unknown || YLR410W || 1080820	1	-0.74	-0.28	-0.48	-0.54	-1	-0.15	-0.05	-1.01	-0.35	-0.29	-0.56	-0.56
A_06_P2939	ERJ5 || biological process unknown || molecular function unknown || YFR041C || 1080821	1	0.39	-0.22	-0.28	0.15	0.12	-0.34	0	1.85	1.22	0.92	0.63	0.41
A_06_P4358	|| biological process unknown || molecular function unknown || YJR115W || 1080822	1			2.1
A_06_P5832	GCD10 || translational initiation* || tRNA binding* || YNL062C || 1080825	1	-2.91	-4	-4.75	-4.31		-4.12	-0.79	-1.99	-5.28	-5.92	-3.52	-3.67
A_06_P2464	RPL27B || protein biosynthesis || structural constituent of ribosome || YDR471W || 1080826	1	-1.5	-1.87	-3.75	-3.98	-3.57	-2.08	-0.1	0.45	-3.32	-4.02	-2.67	-1.69
A_06_P1420	POP7 || rRNA processing* || ribonuclease P activity* || YBR167C || 1080827	1	-0.24	-0.3	0.31	1.16	1.66	1.19	0.04	0.46	0.15	0.12	0.02	0.02
A_06_P1484	SWC5 || chromatin remodeling || molecular function unknown || YBR231C || 1080829	1	-0.26	-0.03	0.17	-0.94	-0.42	-0.24	0.29	-0.96	0.54	0.69	0.12	0.36
A_06_P6953	RSA1 || ribosomal large subunit assembly and maintenance || molecular function unknown || YPL193W || 1080830	1	-0.4	-1.02	-0.01	0.74	0.84	0.79	-0.82	-1.18	-1.59	-1.52	-1.25	-1.36
A_06_P1039	PSK1 || protein amino acid phosphorylation* || protein serine/threonine kinase activity || YAL017W || 1080831	1	2.74	2.44	3.17	3.14	3.13	2.82	0.33	1.38	2.13	2.07	1.78	1.91
A_06_P5304	TRM9 || response to stress* || tRNA (uridine) methyltransferase activity || YML014W || 1080833	1	-1.61	-1.74	-1.9	-1.73	-1.74	-2.35	-0.18	-0.96	-2.49	-2.23	-1.41	-1.04
A_06_P4426	SWD2 || histone methylation* || histone lysine N-methyltransferase activity (H3-K4 specific) || YKL018W || 1080834	1	0.13	-0.29	0.08	0.77	-0.43	-0.82	-0.58	0.47	-0.37	-0.71	-0.9	-1.11
A_06_P3899	|| || || YIL100W || 1080835	1	0.77	0.51	0.64		2		0.36	-0.13
A_06_P6183	|| transport || ATPase activity, coupled to transmembrane movement of substances || YNR070W || 1080836	1			-0.33
A_06_P2746	BOI2 || establishment of cell polarity (sensu Fungi)* || phospholipid binding || YER114C || 1080837	1	-0.38	-0.66	-0.44	0	-0.01	0.42	-0.22	-0.62	-0.52	-0.2	-0.15	-0.1
A_06_P4687	|| biological process unknown || molecular function unknown || YKR049C || 1080838	1	2.76	2.78	3.87	4.49	5.05	4.68	0.18	1.42	2.29	2.18	3.13	3.57
A_06_P3718	RPL42B || protein biosynthesis || structural constituent of ribosome || YHR141C || 1080839	1	-0.81	-1.5	-5.01	-4.25	-3.53	-1.56	-0.2	0.75	-3.48	-4.51	-3.06	-0.86
A_06_P5682	ZRC1 || zinc ion homeostasis* || di-, tri-valent inorganic cation transporter activity* || YMR243C || 1080840	1	-1.31	-1.07	-1.1	-0.59	-1.44	-0.81	-0.36	-0.8	-1.66	-1.66	-1.28	-1.75
A_06_P3581	DIA4 || aerobic respiration* || serine-tRNA ligase activity || YHR011W || 1080841	1	0.36	1.61	1.31	0.75	0.71	0.94	0.22	0.51	0.28	0.37	0.32	0.57
A_06_P4787	ATG10 || protein-vacuolar targeting* || ubiquitin-like conjugating enzyme activity || YLL042C || 1080842	1	0.1	0.25	-0.11	0.1	0.6	0.74	0.17	0.42	0.01	0.05	0.32	0.77
A_06_P5011	SIK1 || rRNA modification* || molecular function unknown || YLR197W || 1080843	1	-2.53	-3.71	-6.05	-4.84	-5.28	-4.11	-0.49	-0.6	-4.46	-5.71	-3.27	-3.25
A_06_P3630	CPR2 || biological process unknown || peptidyl-prolyl cis-trans isomerase activity || YHR057C || 1080844	1	0.36	1.14	1.18	1.35	2.4	2.23	0.11	0.12	0.59	0.6	0.86	1.15
A_06_P5792	HDA1 || regulation of transcription, DNA-dependent* || histone deacetylase activity || YNL021W || 1080845	1	-0.35	-0.55	-1.15	-1.58	-1.1	-3.04	-0.38	-0.15	-0.36	-0.38	-0.6	-0.87
A_06_P6810	ARL3 || intracellular protein transport || GTPase activity || YPL051W || 1080846	1	-0.24	-0.62	-1.46	-0.1	0.48	-0.11	-0.24	0.8	0.04	0.19	0.05	0.44
A_06_P1362	ALG1 || protein amino acid N-linked glycosylation* || beta-1,4-mannosyltransferase activity || YBR110W || 1080847	1	0.05	0.01	-0.34	-0.21	-0.35	-0.71	-0.1	0.02	0.09	0.1	-0.06	-0.23
A_06_P3572	|| biological process unknown || molecular function unknown || YHR003C || 1080850	1	-0.82	-0.94	-1.15	-0.83	-0.76	-0.84	-0.32	0.07	-0.21	-0.27	-0.68	-0.63
A_06_P2070	STN1 || telomere capping || protein binding || YDR082W || 1080852	1	-0.96	-0.41	0.74	1.32	1.08	1.22	-0.13	-0.76	-0.53	-0.33	-0.17	-0.21
A_06_P2249	SWM1 || spore wall assembly (sensu Fungi)* || molecular function unknown || YDR260C || 1080853	1	-0.74	-0.39	-0.45	-1.34	-1.25	-0.84	-0.02	-1.49	0.03	-0.09	-0.52	-0.74
A_06_P1033	SWC3 || chromatin remodeling* || molecular function unknown || YAL011W || 1080854	1	-0.68	-0.42	0.1	0.15	0.33	-0.05	-0.2	-0.52	-1.1	-0.82	-0.73	-0.38
A_06_P2920	LSB3 || actin filament organization || molecular function unknown || YFR024C-A || 1080855	1	1.24	1.44	1.08	0.5	0.57	0.37	0.37	0.48	0.64	0.7	0.41	0.77
A_06_P3879	AIR1 || mRNA-nucleus export* || molecular function unknown || YIL079C || 1080856	1	-3.83	-3.4	-4.21	-3.81	-3.38	-2.84	-0.73	-2.04	-4.78	-4.64	-2.97	-2.79
A_06_P1854	SNA4 || biological process unknown || molecular function unknown || YDL123W || 1080857	1	0.26	0.81	1.94	1.21	0.7	1.83	-0.18	-1.94	0.73	0.8	1.02	0.64
A_06_P6444	|| || || YOR082C || 1080858	1
A_06_P1070	|| biological process unknown || molecular function unknown || YAL044W-A || 1080861	1	-0.12	0.62	0.6	0.85	0.51	1.05	0.07	0.21	0.25	0.3	0.43	0.67
A_06_P6019	|| cysteine metabolism* || cysteine-tRNA ligase activity || YNL247W || 1080862	1	-1.17	-1.81	-3.56	-3.53	-3.17	-2.8	-0.06	-0.32	-2.14	-2.04	-1.86	-1.49
A_06_P3820	HIS6 || histidine biosynthesis || 1-(5-phosphoribosyl)-5-[(5-phosphoribosylamino)methylideneamino]imidazole-4-carboxamide isomerase activity || YIL020C || 1080863	1	-1.5	-1.94	-1.86	-1.17	-0.85	-1.96	-0.62	-0.57	-1.74	-1.74	-1.47	-1.15
A_06_P3351	|| biological process unknown || molecular function unknown || YGR130C || 1080864	1	2.9	3.08	4.16	3.04	3.15	3.27	1.07	0.82	2.11	2.24	1.81	1.82
A_06_P6766	TFC8 || transcription initiation from RNA polymerase III promoter || RNA polymerase III transcription factor activity || YPL007C || 1080865	1	0.42	-0.12	0.14	-0.1	-0.04	-0.95	-0.12	0.79	0.51	0.46	0.06	-0.23
A_06_P7029	PLC1 || pseudohyphal growth* || phosphoinositide phospholipase C activity || YPL268W || 1080866	1	-0.34	-0.43	0	0.47	1	0.83	-0.23	-0.07	-0.54	-0.27	-0.07	0.24
A_06_P1725	PAU3 || biological process unknown || molecular function unknown || YCR104W || 1080869	1	0.63	0.56	1.45	2.18	3.42	2.98	-0.11	0.3	1.1	1.03	1.12	1.4
A_06_P1149	RFT1 || protein amino acid N-linked glycosylation* || oligosaccharide transporter activity || YBL020W || 1080870	1	-1.24	-1.3	-0.74	-1.09	-0.37	-0.75	-0.19	-1.55	-0.79	-0.82	-0.57	-0.62
A_06_P3378	CHO2 || phosphatidylcholine biosynthesis || phosphatidylethanolamine N-methyltransferase activity || YGR157W || 1080871	1	-0.12	0.23	-1.13	-1.39	-1.04	-0.89	0.49	-0.11	0.86	0.8	0.66	0.84
A_06_P4298	HIT1 || biological process unknown || molecular function unknown || YJR055W || 1080872	1		-1.96	-1.87	-0.71		-0.58	-0.08	-1.23	-2.44	-2.1	-1.04	-0.98
A_06_P2338	MRP1 || protein biosynthesis || structural constituent of ribosome || YDR347W || 1080873	1	0.51	1.05	0.83	-0.03	0.1	-0.81	-0.13	-0.34	-0.48	-0.45	-0.63	-0.52
A_06_P3943	TID3 || chromosome segregation* || structural constituent of cytoskeleton || YIL144W || 1080874	1	-0.03	0.23	0.48	0.89	0.18	0.7	-0.07	0.43	0.4	0.74	0.37	0.11
A_06_P4939	|| biological process unknown || molecular function unknown || YLR126C || 1080875	1	-0.65	-1.39	-1.99	-1.34	-0.61	-0.9	0.1	-0.6	1.42	1.21	0.53	0.36
A_06_P3308	CTT1 || response to stress || catalase activity || YGR088W || 1080876	1	5.8	6.53	7.22	6.14	6.64	6.6	0.76	2.34	5.58	5.31	5.38	6.09
A_06_P1966	BRE4 || endocytosis || molecular function unknown || YDL231C || 1080877	1	0.11	-0.6	0.04	0.08	0.78	0.58	0.02	-0.09	1.21	1.24	1.05	1.35
A_06_P4641	ECM9 || cell wall organization and biogenesis || molecular function unknown || YKR004C || 1080878	1	-0.19	-0.42	-0.69	0.26	0.56	0.01	0.27	1.07	0.91	0.93	0.61	0.41
A_06_P2805	RAD24 || meiotic recombination* || DNA clamp loader activity || YER173W || 1080880	1	-0.65	-0.41	0.08	0.58	0.44	0.72	-0.09	0.1	-0.05	0.21	0.26	0.38
A_06_P4608	MIA40 || protein targeting* || molecular function unknown || YKL195W || 1080881	1	1.93	2.4	2.34	1.44	1.11	0.99	0.52	0.72	0.6	0.56	0.26	0.2
A_06_P4653	|| biological process unknown || molecular function unknown || YKR016W || 1080882	1	2.21	1.88	2.97	1.43	1.31	-0.82	0.28	1.19	1.39	1.11	0.65	0.18
A_06_P2785	|| biological process unknown || molecular function unknown || YER152C || 1080883	1	0.1	0.13	0.5	-0.05	0.25	-0.65	0	-0.58	0.78	0.95	0.58	0.64
A_06_P1066	ERV46 || ER to Golgi transport || molecular function unknown || YAL042W || 1080884	1	-0.56	-0.38	-0.78	-1.37	-1.73	-1.01	0.07	-0.7	-1.04	-0.88	-0.87	-1.03
A_06_P6059	SEC21 || ER to Golgi transport* || molecular function unknown || YNL287W || 1080885	1	0.14	0.04	-0.67	-0.99	-1.4	-1.07	0.12	-0.15	-0.08	-0.07	-0.24	-0.6
A_06_P5450	QRI8 || chromatin assembly or disassembly* || ubiquitin-protein ligase activity* || YMR022W || 1080886	1	1.47	0.93	1.5	2.09	1.96	1.28	0.2	2.03	1.96	1.76	1.24	1.34
A_06_P2231	AMD2 || biological process unknown || amidase activity || YDR242W || 1080887	1	0.28	0.22	0.44	0.47	-0.47	0.33	0.84	0.26	3.22	3.02	2.04	2.63
A_06_P5348	NTE1 || phosphatidylcholine metabolism || hydrolase activity* || YML059C || 1080888	1	-0.15	0.27	0.16	-0.54	-0.11	-1.13	-0.09	0.02	0.07	0.26	0.06	0.03
A_06_P3595	MAS2 || mitochondrial protein processing || mitochondrial processing peptidase activity || YHR024C || 1080889	1	-0.33	0.29	-0.27	-1.65	-2.1	-2.45	-0.02	-0.79	-1.21	-1.39	-1.74	-2.01
A_06_P2277	NSE3 || DNA repair || DNA binding || YDR288W || 1080890	1	0.48	0.1	0.49	1.06	1.01	0.62	-0.23	0.5	0.58	0.53	0.31	0.53
A_06_P3333	DAM1 || mitotic spindle organization and biogenesis in nucleus* || structural constituent of cytoskeleton || YGR113W || 1080891	1	-0.12	-0.23	0.25	-0.25	-0.54	-0.55	0.33	-0.14	0.53	0.82	0.57	0.3
A_06_P3180	VRG4 || protein amino acid N-linked glycosylation* || nucleotide-sugar transporter activity || YGL225W || 1080892	1	-2.01	-1.57	-2.57	-4.41	-3.76	-3.3	0.87	-1.57	-0.9	-0.79	-0.88	-0.84
A_06_P6294	IZH4 || lipid metabolism* || metal ion binding || YOL101C || 1080893	1	-0.41	0.13	-0.7	0.35	0.86	-0.13	-0.15	-0.17	-0.24	-0.38	-1.17	-1.69
A_06_P2629	PAC2 || post-chaperonin tubulin folding pathway* || alpha-tubulin binding || YER007W || 1080894	1	-0.62	-0.6	-0.17	0.49	0.74	0.29	-0.23	-0.74	-0.94	-0.77	-0.71	-0.78
A_06_P5869	RAS2 || sporulation (sensu Fungi)* || GTPase activity || YNL098C || 1080895	1	1.29	0.81	0.27	-0.01	-0.24	-0.19	0.01	0.9	0.67	0.38	0.1	-0.41
A_06_P1639	SRD1 || rRNA processing || molecular function unknown || YCR018C || 1080896	1		-0.86					0
A_06_P5402	ZDS2 || establishment of cell polarity (sensu Fungi)* || molecular function unknown || YML109W || 1080898	1	-0.67	-1.47	-1.22	-0.77	-0.4	-0.19	-0.2	-0.12	-0.97	-0.62	-0.23	0.23
A_06_P2144	RPA14 || transcription from RNA polymerase I promoter || DNA-directed RNA polymerase activity || YDR156W || 1080899	1	-2.27	-1.37	-1.39	-1.88	-1.68	-1.1	-0.51	-1.79	-2.59	-2.57	-1.48	-1.49
A_06_P3474	PUP2 || response to stress* || endopeptidase activity || YGR253C || 1080900	1	0.78	0.96	0.52	0.52	0.45	1.01	0.2	0.83	1	0.77	0.53	0.42
A_06_P1288	FAT1 || lipid transport* || long-chain-fatty-acid-CoA ligase activity* || YBR041W || 1080902	1	0.63	0.37	-0.22	-0.7	-1.12	-1	0.33	0.3	0.37	0.29	-0.07	-0.37
A_06_P1432	FZO1 || mitochondrion organization and biogenesis* || GTPase activity || YBR179C || 1080903	1	0.32	0.58	1.27	1.16	1.74	1.35	0.18	-0.31	-0.18	-0.08	0.16	0.64
A_06_P2998	DST1 || meiotic recombination* || positive transcription elongation factor activity || YGL043W || 1080904	1	-0.82	-0.61	-0.97	-0.99	-0.99	-0.84	0.34	-0.49	-0.94	-0.86	-0.99	-1.02
A_06_P4693	RHO4 || actin filament organization* || GTPase activity* || YKR055W || 1080905	1	0.33	-0.41	0.29	1.17	-0.05	0.39	-0.14	-0.43	0.76	0.83	0.48	-0.16
A_06_P3858	|| || || YIL058W || 1080906	1	0.31	-0.23	-0.26				-0.38
A_06_P6472	TFC7 || transcription initiation from RNA polymerase III promoter || RNA polymerase III transcription factor activity || YOR110W || 1080907	1	0.48	0.42	0.01	-0.06	-0.03	-0.18	0.04	0.72	0.58	0.48	0.46	0.34
A_06_P6518	NFI1 || protein sumoylation* || SUMO ligase activity || YOR156C || 1080908	1	0.06	0.26	0.45	0.73	0.26	0.64	-0.15	-0.21	0.15	0.2	-0.17	0.03
A_06_P6507	PNO1 || rRNA processing* || unfolded protein binding || YOR145C || 1080909	1	-4.04	-3.55	-3.06	-2.84	-2.92	-2.19	-0.53	-2.68	-4.11	-3.44	-1.6	-1.65
A_06_P6776	|| biological process unknown || S-adenosylmethionine-dependent methyltransferase activity || YPL017C || 1080910	1	1.95			3.06				0.3			2.11
A_06_P2741	FLO8 || pseudohyphal growth* || specific RNA polymerase II transcription factor activity || YER109C || 1080911	1	-0.48	-0.69	-0.66	-0.52	-1.01	-0.86	-0.08	-0.47	-0.32	-0.15	-0.39	-0.78
A_06_P6588	ISU2 || iron ion homeostasis* || molecular function unknown || YOR226C || 1080912	1	-0.99	-0.92	-1.52	-1.72	-2.03	-1.91	0.13	-0.14	-0.86	-1.06	-1.16	-1.12
A_06_P5499	ABF2 || mitochondrial genome maintenance* || DNA binding* || YMR072W || 1080914	1	0.64	1.05	1.42	0.64	0.41	0.68	0.44	-0.22	0.73	0.98	0.81	0.73
A_06_P7131	|| biological process unknown || molecular function unknown || YPR084W || 1080915	1	0.32	0.27	0.5	0.67	0.93	0.78	0.16	0.04	0.18	0.33	0.39	0.89
A_06_P4629	JEN1 || lactate transport || lactate transporter activity || YKL217W || 1080916	1	3.38	3.59	9.34	6.64	6.64	6.64	0.2	-0.03				1.92
A_06_P4675	SPC34 || mitotic spindle organization and biogenesis in nucleus* || structural constituent of cytoskeleton || YKR037C || 1080917	1	0.22	-0.19	0.06	-0.02	-0.24	-0.07	0	-0.01	0.06	0.29	0.25	0.24
A_06_P5803	SIW14 || endocytosis* || protein tyrosine phosphatase activity || YNL032W || 1080918	1	-0.35	-0.27	-0.26	0.22	0.06	-0.08	-0.01	0.13	0.02	-0.01	0.13	0.07
A_06_P5109	GSP1 || rRNA processing* || GTPase activity || YLR293C || 1080919	1	-1.31	-1.98	-3.6	-3.65	-3.69	-3.36	0.23	-0.31	-1.89	-2.28	-1.74	-2.01
A_06_P1475	PCS60 || biological process unknown || AMP binding || YBR222C || 1080920	1	0.45	0.89	1.48	1.3	2.27	1.61	0.3	-0.11	0.43	0.86	1.16	1.48
A_06_P3098	MRF1 || protein biosynthesis* || translation release factor activity || YGL143C || 1080921	1	0.94	1.47	1.66	0.72	0.77	0.09	0.15	0.17	0.55	0.55	0.31	0.52
A_06_P6796	EGD1 || nascent polypeptide association || unfolded protein binding || YPL037C || 1080922	1	-0.98	-0.48	-1.8	-1.16	-1.02	-0.41	-0.42	0.13	-0.47	-0.69	-0.63	-0.78
A_06_P3305	RPL11B || protein biosynthesis* || structural constituent of ribosome || YGR085C || 1080923	1	-1.57	-2.31	-5.01	-4.02	-3.68	-2.51	-0.37	0.63	-2.36	-3.72	-2.59	-1.72
A_06_P6656	UAF30 || transcription from RNA polymerase I promoter || RNA polymerase I transcription factor activity* || YOR295W || 1080924	1	-1.86	-1.46	-1.71	-0.25	-0.91	-0.63	-0.27	-0.04	-1.51	-1.38	-0.66	-0.5
A_06_P7181	TOM5 || mitochondrial matrix protein import || protein transporter activity || YPR133W-A || 1080925	1	-0.32	0.23	-1.17	-1.34	-1	-2.04	-0.22	0.74	-1.02	-1.13	-1.43	-1.02
A_06_P3902	DPH1 || peptidyl-diphthamide biosynthesis from peptidyl-histidine || molecular function unknown || YIL103W || 1080926	1	-3.31	-3.59	-4.64	-4.16	-4.44	-2.89	-0.42	-1.52	-5.02	-4.97	-2.87	-2.85
A_06_P1183	|| || || YBL053W || 1080927	1	-0.24		-0.38			-0.64	0.02				-0.6
A_06_P6486	UBP2 || protein deubiquitination || ubiquitin-specific protease activity || YOR124C || 1080928	1	0.85	1.06	1.06	1.49	1.45	1	0.4	1.33	1.22	1.19	0.92	0.67
A_06_P4938	|| biological process unknown || molecular function unknown || YLR125W || 1080929	1	0.59	0.83	1.69	1.53	2.4	2.54	-0.15	-0.3	1.27	1.41	1.27	1.99
A_06_P3243	MTL1 || cell wall organization and biogenesis || molecular function unknown || YGR023W || 1080930	1	1.39	1.13	2.58
A_06_P3234	MSB2 || establishment of cell polarity (sensu Fungi)* || osmosensor activity || YGR014W || 1080931	1	-0.46	-0.68	-1.7	-1.81	-1.87	-1.55	0.47	-0.04	-0.24	0.36	0.51	0.27
A_06_P2700	ARG5,6 || regulation of transcription* || N-acetyl-gamma-glutamyl-phosphate reductase activity* || YER069W || 1080932	1	-1.08	-2.36	-2.65	-2.79	-2.2	-2.01	0.06	-0.31	-1.75	-1.5	-1.05	-0.85
A_06_P4510	UTP11 || processing of 20S pre-rRNA || snoRNA binding || YKL099C || 1080933	1	-3.82	-4.01	-4.75	-3.66	-3.38	-2.58	-0.4	-2.09	-5.11	-4.53	-2.45	-1.81
A_06_P4535	|| || || YKL123W || 1080934	1	1.84	1.68	2.44	2.47	3.08	2.81	0.26	0.5	1.6	1.57	1.62	1.86
A_06_P1642	PET18 || mitochondrion organization and biogenesis* || molecular function unknown || YCR020C || 1080935	1	-0.74		0.21	1.89	2.32	1.86	-0.43	0.97	1.39	1.33	1.34	2.64
A_06_P3594	MYO1 || response to osmotic stress* || microfilament motor activity || YHR023W || 1080936	1	-0.17	-0.21	-1.07	-1.2	-1.44	-2.71	-0.08	0.06	0.26	0.61	0.04	-0.26
A_06_P6675	RPL20B || protein biosynthesis || structural constituent of ribosome || YOR312C || 1080937	1	-1.49	-2.21	-4.52	-4.3	-4.21	-2.79	0	0.12	-3.21	-4.23	-3.26	-2.19
A_06_P1178	|| || || YBL048W || 1080938	1	2.6	3.32	3.87	5.44	6.31	6.03	0.27	0.49	4.88	4.95	4.3	5.72
A_06_P1135	LDB7 || cell wall mannoprotein biosynthesis || molecular function unknown || YBL006C || 1080939	1	-0.17	-0.07	0.19	-0.46	-0.61	-0.19	0.07	-0.62	0.18	0.33	0.05	-0.09
A_06_P1883	RPC53 || transcription from RNA polymerase III promoter || DNA-directed RNA polymerase activity || YDL150W || 1080941	1	-2.75	-1.76	-2.41	-2.06	-2.73	-1.57	-0.55	-1.1	-3.57	-3.1	-2.54	-2.4
A_06_P3194	CSE1 || protein-nucleus export || importin-alpha export receptor activity || YGL238W || 1080942	1	-0.77	-0.48	-1.1	-0.89	-0.43	-0.65	0.08	-0.01	-0.29	-0.25	-0.33	-0.88
A_06_P6807	CAM1 || regulation of translational elongation || translation elongation factor activity || YPL048W || 1080943	1	0.17	0.49	0.3	0.17	-0.43	-0.07	0.02	0.18	0.11	0.33	0.11	-0.12
A_06_P1009	AI5_BETA || biological process unknown || molecular function unknown || Q0075 || 1080944	1			1.34	-0.53		1.54	1		-0.59		-0.71	0.68
A_06_P2163	RSM24 || protein biosynthesis* || structural constituent of ribosome || YDR175C || 1080945	1	0.69	0.91	1.27	0.42	-0.29	-0.19	0.13	-0.12	-0.39	-0.42	-0.27	-0.84
A_06_P5180	NMD4 || mRNA catabolism, nonsense-mediated decay || molecular function unknown || YLR363C || 1080946	1	-0.21	-0.19	-0.06	-0.57	-0.47	-1.03	0.36	-0.34	0.17	0.22	-0.22	-0.33
A_06_P2526	|| biological process unknown || molecular function unknown || YDR532C || 1080947	1	0.9	0.43	1.12	1.38	1.78	1.02	0	0.97	0.63	0.92	0.71	0.5
A_06_P4877	|| biological process unknown || molecular function unknown || YLR065C || 1080948	1	-1.16	-1.12	-1.98	-1.96	-1.52	-1.36	0.01	-0.3	-0.72	-0.71	-0.99	-0.98
A_06_P3185	SAP4 || G1/S transition of mitotic cell cycle || protein serine/threonine phosphatase activity || YGL229C || 1080949	1	2.22	2.6	2.11	0.81	1.35	-0.41	0.39	0.91	1.47	1.44	0.9	0.07
A_06_P6171	BIO3 || biotin biosynthesis || adenosylmethionine-8-amino-7-oxononanoate transaminase activity || YNR058W || 1080950	1	-0.19	-0.67	-0.67	-0.23	0.19	0.14	0.12	0.92	1.71	2.81	3.64	4.16
A_06_P3614	NCP1 || ergosterol biosynthesis || electron transporter activity || YHR042W || 1080951	1	-0.8	-0.84	-1.39	-1.93	-1.16	-2.13	0.14	-0.23	-0.68	-0.53	-0.44	-0.43
A_06_P4275	CPR7 || response to stress || unfolded protein binding* || YJR032W || 1080952	1	-1.5	-1.47	-2.45	-1.75	-1.73	-2.03	0.02	-0.05	-0.69	-0.7	-0.87	-1.1
A_06_P1491	PRP5 || U2-type nuclear mRNA branch site recognition || RNA splicing factor activity, transesterification mechanism* || YBR237W || 1080954	1	-0.15	0.14	1.16	0.63	0.63	0.45	0.08	-0.34	-0.46	-0.27	-0.36	-0.01
A_06_P4049	|| || || YJL028W || 1080955	1	0.63	-0.28	-0.28				0.05	-0.29
A_06_P6617	|| biological process unknown || molecular function unknown || YOR256C || 1080956	1	0.48	0.44	0.59	0.77	1.21	1.06	0.14	-0.29	0.1	0.16	0.18	0.28
A_06_P2565	RIP1 || aerobic respiration* || ubiquinol-cytochrome-c reductase activity || YEL024W || 1080957	1	2.07	2.35	3.48	2.69	1.95	0.98	0.66	0.49	0.37	0.25	0.33	0.18
A_06_P3324	SRB5 || transcription from RNA polymerase II promoter || RNA polymerase II transcription mediator activity || YGR104C || 1080958	1	0.04	-0.04	0.12	0.2	0.19	-0.3	0.11	0.39	-0.15	-0.06	-0.29	-0.01
A_06_P4482	STB6 || biological process unknown || molecular function unknown || YKL072W || 1080959	1	-1.6	-1.98	-2.6	-2.56		-2.02	-0.73	-0.88	-0.97	-0.37	-0.27	-0.21
A_06_P5526	MTG1 || protein biosynthesis* || GTPase activity || YMR097C || 1080960	1	0.9	0.91	1.65	1.96	1.52	1.1	-0.04	1.31	1.1	1.2	1.05	0.76
A_06_P3939	AXL2 || bud site selection* || molecular function unknown || YIL140W || 1080961	1	-0.56	-1.3	-2.72	-2.75	-1.89	-1.81	0.27	-0.51	-0.49	-0.47	0.07	0.3
A_06_P4121	CHS6 || Golgi to plasma membrane transport* || molecular function unknown || YJL099W || 1080962	1	0.15	0.52	0.59	-0.47	-0.24	-0.32	0.35	-0.71	-0.06	0.29	-0.31	-0.26
A_06_P1046	LTE1 || regulation of exit from mitosis || guanyl-nucleotide exchange factor activity || YAL024C || 1080963	1	-0.31	-0.49	-1.26	-1.2	-1.25	-1.11	-0.08	0.03	0.51	0.63	0.47	0.45
A_06_P3558	ARN1 || iron-siderophore transport || siderophore-iron transporter activity || YHL040C || 1080964	1	-0.28	-0.62	0.01	0.84	-0.66	0.93	-0.71	-0.41	-0.8	-0.83	-0.73	-0.83
A_06_P2375	RPP2B || translational elongation* || structural constituent of ribosome || YDR382W || 1080965	1	-0.19	-1.65	-3.92	-3.45	-2.25	-1.75	-0.03	0.64	-1.47	-3.35	-2.37	-0.74
A_06_P3191	|| biological process unknown || molecular function unknown || YGL235W || 1080966	1
A_06_P6131	|| biological process unknown || molecular function unknown || YNR020C || 1080967	1	-0.15	0.14	-0.49	-1.66	-1.72	-1.58	-0.18	-0.91	-1.22	-0.93	-0.86	-0.7
A_06_P2041	CDC34 || G1/S transition of mitotic cell cycle* || ubiquitin-protein ligase activity* || YDR054C || 1080968	1	0.78	0.44	1.35	1.51	2.02	1.4	-0.18	0.25	0.68	0.54	0.64	1.09
A_06_P4346	URA8 || phospholipid biosynthesis* || CTP synthase activity || YJR103W || 1080969	1	1.29	1.66	1.3	0.95	1.41	1.5	0.28	0.3	2.31	2.68	1.81	1.77
A_06_P6288	HMI1 || mitochondrial genome maintenance || ATP-dependent DNA helicase activity || YOL095C || 1080970	1	-0.17	-0.15	-0.35	0.01	0.32	-0.39	-0.12	0.43	-0.07	0.14	-0.08	-0.09
A_06_P3824	|| biological process unknown || molecular function unknown || YIL024C || 1080971	1	0.5	1.07	1.39	1.74	1.85	1.77	-0.01	0.52	1.36	1.43	1.21	1.77
A_06_P3300	TWF1 || bipolar bud site selection* || actin monomer binding || YGR080W || 1080972	1	1.31	1.29	0.75	0.84	0.56	0.05	0.24	1.01	1.83	1.38	1	0.52
A_06_P3786	BAT1 || branched chain family amino acid biosynthesis* || branched-chain-amino-acid transaminase activity || YHR208W || 1080973	1	-2.1	-1.45	-3.75	-4.48	-4.31	-3.89	0.36	-1.05	-3.05	-3.42	-2.93	-2.56
A_06_P7120	TKL1 || pentose-phosphate shunt || transketolase activity || YPR074C || 1080975	1	-1.15	-1.82	-4.78	-5	-4.28	-4.68	-0.21	-0.83	-2.74	-3.15	-2.63	-2.23
A_06_P3918	RPI1 || thiamin biosynthesis* || small GTPase regulator activity || YIL119C || 1080976	1	0.5	0.28	-1.97	-2.1		-1.18	0.24	-0.16	1.58	2.05	1.41	0.14
A_06_P5975	|| || || YNL203C || 1080977	1
A_06_P1495	|| biological process unknown || molecular function unknown || YBR241C || 1080979	1	1.74	2.31	3.19	3.43	4.5	4.25	-0.07	0.32	2.19	2.24	2.47	2.64
A_06_P4645	RSC4 || chromatin remodeling || molecular function unknown || YKR008W || 1080980	1	-0.26	-0.28	-0.05	0.57	0.31	0.06	0.15	0.55	0.35	0.41	0	-0.39
A_06_P1498	GPX2 || response to oxidative stress || glutathione peroxidase activity || YBR244W || 1080981	1	-0.8	-1.8	-2.5	-1.67	-1.7	-1.96	0.45	0.75	-0.53	-0.98	-1.07	-0.7
A_06_P2832	CDC4 || G1/S transition of mitotic cell cycle* || protein binding* || YFL009W || 1080982	1	0.18	-0.28	-0.07	0.09	-0.49	-0.44	-0.3	0.22	-0.13	-0.06	-0.31	-0.3
A_06_P5412	NGL3 || biological process unknown || endonuclease activity || YML118W || 1080983	1		1.82	3.68	2.41	2.19	3.19		-0.63	0.39	0.48	0.9	1.15
A_06_P2829	|| || || YFL006W || 1080984	1	0.02	0.71	1	1.35	1.28	2.29	0.19	-0.61	-0.19	-0.05	0.07	0.52
A_06_P5106	|| biological process unknown || molecular function unknown || YLR290C || 1080985	1	1.7	1.58	1.98	1.55	1.14	1.29	0.68	0.96	1.53	1.69	1.33	1.15
A_06_P5899	TEP1 || spore wall assembly (sensu Fungi)* || inositol or phosphatidylinositol phosphatase activity || YNL128W || 1080986	1	-0.19	-0.15	-0.59	-0.41		-0.2	-0.2	0.02	1.77	1.34	1	0.74
A_06_P7110	|| || || YPR064W || 1080987	1								0.29
A_06_P1889	|| biological process unknown || molecular function unknown || YDL156W || 1080988	1	-1.13	-1.04	-1.5	-2.2	-1.54	-1.04	-0.25	-1	-0.69	-0.7	-0.64	-0.29
A_06_P2107	|| biological process unknown || molecular function unknown || YDR119W || 1080989	1	-0.55	-0.96	-1.7	-1.68	-0.48	-0.82	0.14	-0.63	-0.15	0.01	-0.29	-0.22
A_06_P3639	SSF1 || ribosomal large subunit assembly and maintenance* || rRNA binding || YHR066W || 1080990	1	-4.73	-3.9	-4.48	-4.21	-4.25	-2.84	-0.29	-1.43	-4.32	-4.63	-2.75	-1.94
A_06_P4389	RPS4A || protein biosynthesis* || structural constituent of ribosome || YJR145C || 1080991	1	-1.15	-2.04	-4.99	-5.11	-5.17	-3.14	-0.08	-0.38	-3.06	-4.63	-3.44	-2.77
A_06_P4055	KAR2 || SRP-dependent cotranslational protein-membrane targeting, translocation* || ATPase activity* || YJL034W || 1080992	1	-0.47	0.54	-0.6	-0.18	-0.63	-0.06	0.31	1.11	0.15	-0.05	0.63	0.95
A_06_P6017	CWC25 || nuclear mRNA splicing, via spliceosome || molecular function unknown || YNL245C || 1080993	1	-0.88	-0.95	0.23	-0.31	-0.72	0.04	-0.09	-1.53	-1.07	-0.85	-0.32	-0.69
A_06_P4586	SNU114 || nuclear mRNA splicing, via spliceosome || GTPase activity* || YKL173W || 1080994	1	-0.84	-0.48	-0.6	0.06	0.93	0.47	-0.37	-0.08	-0.94	-0.9	-0.66	-0.21
A_06_P4604	DPH2 || peptidyl-diphthamide biosynthesis from peptidyl-histidine || molecular function unknown || YKL191W || 1080995	1	-2.1	-2.76	-2.66	-1.64	-1.39	-0.6	-0.35	-1.76	-3.79	-3.48	-1.74	-1.15
A_06_P3227	MUQ1 || phosphatidylethanolamine biosynthesis || ethanolamine-phosphate cytidylyltransferase activity || YGR007W || 1080997	1	-0.71	-0.51	-0.54	-0.34	-1.07	-0.6	0.04	0.03	0.63	0.6	0.25	-0.42
A_06_P1869	RPL35B || protein biosynthesis || structural constituent of ribosome || YDL136W || 1080998	1	-1.85	-1.8	-4.23	-4.37	-2.77	-1.45	0.11	-0.61	-2.31	-3.12	-1.98	-1.07
A_06_P2502	|| || || YDR509W || 1081000	1	0.91		0.19				0.24	0.02			-0.8
A_06_P5760	|| || || YMR316C-B || 1081002	1	1.56	0.96	1.9	1.06	0.56	0.61	0.17	0.04	0.57	0.68	0.35	0.47
A_06_P6488	IAH1 || acetate metabolism || hydrolase activity, acting on ester bonds || YOR126C || 1081003	1	-0.05	-0.1	-0.66	-0.05	0.39	-0.11	0.02	-0.08	-0.6	-0.92	-0.51	0.12
A_06_P4419	PRP40 || nuclear mRNA splicing, via spliceosome || RNA binding || YKL012W || 1081004	1	0.25	0.18	0.56	0.5	0.23	0.19	0.17	-0.17	-0.18	-0.09	-0.02	0.14
A_06_P5003	ATG26 || sterol metabolism || sterol 3-beta-glucosyltransferase activity || YLR189C || 1081006	1	1.07	0.74	1.21	1.83	1.92	1.9	0.4	0.23	1.4	1.61	1.56	1.73
A_06_P4632	FRE2 || iron ion transport* || ferric-chelate reductase activity || YKL220C || 1081007	1	0.52	0.8	1.93	1.99	2.62	2.25	0.08	0.47	0.85		0.48	0.51
A_06_P6172	MNT4 || protein amino acid O-linked glycosylation || alpha-1,3-mannosyltransferase activity || YNR059W || 1081008	1	0.02	-0.42	0.66	1.03	0.86	0.62	-0.04	0.85	0.35	0.37	0.45	0.84
A_06_P3411	|| || || YGR190C || 1081009	1	-0.54		0.36				-0.12				3.14
A_06_P2870	|| regulation of transcription || molecular function unknown || YFL044C || 1081010	1	0.13	0.51	0.39	0.34	0.45	0.56	-0.45	-0.54	0.43	0.13	-0.48	-0.7
A_06_P7167	CLB5 || G1/S transition of mitotic cell cycle* || cyclin-dependent protein kinase regulator activity || YPR120C || 1081012	1	-1.13	-1.47	-1.32	-1.21	-0.89	-1.01	0.05	0.08	-0.12	-0.09	0.1	0.02
A_06_P7199	SUE1 || protein catabolism || molecular function unknown || YPR151C || 1081013	1	4.78	4.7	6.63	6.28	6.64	6.64	0.4	2.59	4.49	4.59	4.48	6.09
A_06_P3807	EST3 || telomerase-dependent telomere maintenance || telomerase activity || YIL009C-A || 1081014	1	0.35	-0.21	0.05	0.27	0.47	-0.37	0.42	0.83	0.95	0.99	0.51	0.46
A_06_P1716	HMRA2 || biological process unknown || molecular function unknown || YCR096C || 1081015	1	0.82	0.63	1.49	1.66	1.42	1.36	0.2	0.99	0.84	1.23	0.93	1.23
A_06_P2710	|| biological process unknown || molecular function unknown || YER079W || 1081016	1	2.46	2.15	3.37	2.32	2.55	2.59	0.89	1.29	2.21	2.18	1.68	1.76
A_06_P5481	STV1 || vacuolar acidification || hydrogen-transporting ATPase activity, rotational mechanism || YMR054W || 1081017	1	0.9	0.75	0.54	-0.2	0.39	-0.43	0.07	0.19	0.91	1	0.64	0.63
A_06_P3876	SEC28 || ER to Golgi transport* || molecular function unknown || YIL076W || 1081018	1	0.32	0.13	-0.63	-0.31	-0.03	-0.86	0.03	1.4	1.04	0.8	0.45	0.43
A_06_P2381	RVS167 || endocytosis* || cytoskeletal protein binding || YDR388W || 1081019	1	0.61	1.32	1.21	0.2	0.12	0.06	0.36	-0.24	0.56	0.56	0.47	0.24
A_06_P2382	SAC7 || small GTPase mediated signal transduction* || signal transducer activity* || YDR389W || 1081020	1	-0.21	-0.12	-0.02	-1	0.01	-0.35	0.51	-1.13	-0.03	-0.01	-0.11	-0.2
A_06_P6560	BFR1 || meiosis* || RNA binding || YOR198C || 1081021	1	-0.46	-0.24	-1.55	-3.68	-3.57	-3.22	-0.06	-1.64	-1.52	-1.73	-1.85	-2.17
A_06_P2275	|| biological process unknown || molecular function unknown || YDR286C || 1081023	1	1.57	1.5	1.2	2.25	2.38	1.87	0.64	1.98	1.62	1.44	1.33	1.76
A_06_P4732	RPL40B || protein biosynthesis* || structural constituent of ribosome* || YKR094C || 1081024	1	-0.53	-0.93	-2.56	-3.42	-3.05	-1.51	0.09	0.37	-2.28	-2.9	-2.2	-1.15
A_06_P5549	|| || || YMR119W-A || 1081025	1	1.51	1.33	1.16	1.44	2.56	1.88	0.27	0.55	2.03	1.91	1.67	1.51
A_06_P5924	GIM3 || tubulin folding || tubulin binding || YNL153C || 1081026	1	-1.27	-1.48	-1.93	-2.68	-2.07	-2.47	-0.55	-1.01	-1.41	-1.43	-1.57	-1.31
A_06_P3619	AAP1' || proteolysis and peptidolysis* || aminopeptidase activity || YHR047C || 1081027	1	0.33	0.8	0.01	-1.27	-0.86	-0.6	-0.04	-0.66	-0.7	-0.55	-0.69	-0.82
A_06_P5296	MRPL39 || protein biosynthesis || structural constituent of ribosome || YML009C || 1081028	1	0.71	1.6	0.58	0.32	1.01	0	-0.07	0.75	0.48	0.3	-0.08	-0.15
A_06_P1612	MRC1 || chromatin silencing at telomere* || molecular function unknown || YCL061C || 1081029	1	-1.29	-1.27	-1.22	-1.96	-1.76	-1.17	0.3	-0.95	-0.45	-0.33	-0.49	-0.67
A_06_P2032	RPC11 || transcription from RNA polymerase III promoter || DNA-directed RNA polymerase activity || YDR045C || 1081030	1	-1.17	-1.5	-1.23	-1.41	-0.53	-1.15	-0.18	0.4	-1.44	-1.42	-1.31	-0.96
A_06_P2034	HEM12 || heme biosynthesis || uroporphyrinogen decarboxylase activity || YDR047W || 1081031	1	0.25	0.71	0.47	-0.42	-0.92	-1.4	0.01	-0.26	-0.35	-0.61	-0.76	-1.2
A_06_P1641	MAK32 || viral life cycle || molecular function unknown || YCR019W || 1081032	1	-0.17	-0.61	0.42	-0.52	-0.57	-0.77	-0.02	-0.83	-0.29	-0.26	-0.48	-0.7
A_06_P3193	HAP2 || transcription* || transcriptional activator activity || YGL237C || 1081034	1	1.55	1.23	1.9	1.73	0.95	1.38	-0.3	0.26	1.17	1.1	0.82	0.26
A_06_P6550	MSB1 || establishment of cell polarity (sensu Fungi) || molecular function unknown || YOR188W || 1081035	1	-1.3	-1.52	-1.78	-1.55	-1.61	-1.48	-0.15	-0.7	-1.57	-0.89	-0.65	-0.44
A_06_P5421	RSC9 || regulation of transcription from RNA polymerase II promoter* || chromatin binding || YML127W || 1081036	1	0.92	0.15	-0.61	-0.65	-0.24	-1.02	-0.42	0.3	0.32	0.36	0.14	0.35
A_06_P3694	SET1 || chromatin silencing at telomere* || histone lysine N-methyltransferase activity (H3-K4 specific)* || YHR119W || 1081037	1	-0.54	-0.56	-0.41	0.01	0.09	0.09	-0.21	0.34	-0.66	-0.31	-0.22	0.08
A_06_P4132	GZF3 || negative regulation of transcription from RNA polymerase II promoter* || transcription factor activity* || YJL110C || 1081038	1	-0.37	-0.47	-0.6	-0.34	-0.84	-0.81	-0.12	-0.25	-0.14	-0.14	-0.22	-0.05
A_06_P3735	REC104 || meiotic recombination* || molecular function unknown || YHR157W || 1081039	1	-0.27	0.07	0.87	2.15	1.66		0.13	0.61	1.17		0.98	1.33
A_06_P2499	|| biological process unknown || molecular function unknown || YDR506C || 1081040	1	0.93	0.76	1.03	0.27	-0.17	0.46	0.41	-1.35	-0.08	0.22	-0.23	0.21
A_06_P6652	|| biological process unknown || molecular function unknown || YOR291W || 1081041	1	0.78	1.26	0.6	0.48	0.65	0.73	0.11	0.77	0.44	0.28	0.53	0.69
A_06_P7042	ERR2 || biological process unknown || phosphopyruvate hydratase activity || YPL281C || 1081042	1	0.49	1.17		3.67	6.52	6.38		-0.05	1.08	0.65	1.91	3.19
A_06_P3719	CHS7 || ER to Golgi transport* || molecular function unknown || YHR142W || 1081043	1	-0.61	-0.72	-1.72	-1.93	-2.9	-1.98	-0.33	-0.67	-1.58	-1.81	-1.39	-1.06
A_06_P3930	FKH1 || pseudohyphal growth* || transcription factor activity || YIL131C || 1081044	1	-0.94	-1.24	-1.8	-1.67	-1.95	-1.4	-0.3	-0.69	-0.84	-0.02	0.12	-0.57
A_06_P2730	|| || || YER097W || 1081046	1		-0.14
A_06_P6031	ATX1 || response to oxidative stress* || copper chaperone activity || YNL259C || 1081047	1	-0.31	0.26	-0.41	0.02	0.75	0.05	-0.15	0.57	0.22	0.23	0.45	0.92
A_06_P3850	PCL7 || regulation of glycogen biosynthesis* || cyclin-dependent protein kinase regulator activity || YIL050W || 1081048	1	1.09	1.16	1.44	1.88	1.47	1.09	0.03	0.58	1.98	2.23	1.95	1.2
A_06_P1461	DUR1,2 || allantoin catabolism* || allophanate hydrolase activity* || YBR208C || 1081049	1	-0.31	-1.13	-2.43	-2.68	-2.7	-1.79	1.08	-0.14	1.48	1.81	1.89	2.44
A_06_P6387	HST3 || chromatin silencing at telomere* || DNA binding || YOR025W || 1081050	1	-0.12	-0.02	-0.43	-1.11	-1.22	-1.29	0.11	-0.28	0.15	0.41	-0.03	-0.65
A_06_P1842	TRM3 || tRNA methylation || tRNA (guanosine) methyltransferase activity || YDL112W || 1081051	1	-2.05	-2.49	-3.68	-2.33	-2.96	-2.36	-0.32	-0.61	-3.7	-3.35	-1.86	-1.58
A_06_P7165	|| methionine salvage || ribose isomerase activity || YPR118W || 1081052	1	-1.61	-2.45	-3.17	-2.52	-2.16	-2.14	-0.22	-0.36	-1.85	-1.89	-1.79	-1.52
A_06_P6642	PLP2 || positive regulation of transcription from RNA polymerase II promoter by pheromones || GTPase inhibitor activity || YOR281C || 1081053	1	-0.21	-0.38	-0.99	-1.54	-1.87	-2.44	0.13	-0.11	-0.62	-0.53	-0.79	-1.01
A_06_P6735	GPB1 || signal transduction || signal transducer activity || YOR371C || 1081054	1	-0.34	-0.19	0.21	0.41	0.03	0.48	-0.15	-0.8	-0.88	-0.64	-0.41	-0.13
A_06_P7040	|| biological process unknown || molecular function unknown || YPL279C || 1081055	1	-1.09	-0.83	-0.98	-1.98	-1.25	-1.25	0.13	-1.66	-0.49	-0.39	-0.88	-1.15
A_06_P3274	|| translational initiation || translation initiation factor activity || YGR054W || 1081056	1	-0.96	-0.54	-0.74	-2.13	-1.02	-1.15	0.24	-1.25	-1.38	-1.28	-1.32	-0.99
A_06_P3347	|| biological process unknown || molecular function unknown || YGR126W || 1081057	1							-0.13	-0.62
A_06_P6926	REV3 || DNA repair* || zeta DNA polymerase activity || YPL167C || 1081058	1	0.95	0.91	1.4	2.26	2.56	2.89	0.13	1.07	0.91	1.15	1.27	1.97
A_06_P2088	|| biological process unknown || molecular function unknown || YDR100W || 1081059	1	1.15	1.62	1.92	1.78	1.8	0.9	-0.05	0.46	1.53	1.3	0.83	0.07
A_06_P7145	|| biological process unknown || molecular function unknown || YPR098C || 1081060	1	1.14	1.93	2.16	2.99	3.74	3	0.11	0.79	2.21	2.11	1.97	2.11
A_06_P2164	NGG1 || histone acetylation* || transcription cofactor activity || YDR176W || 1081061	1	0.16	-0.04	0.32	-0.13	0.15	0.4	-0.04	-0.23	-0.39	0.07	-0.3	-0.49
A_06_P2307	MCM21 || chromosome segregation || protein binding || YDR318W || 1081062	1	0.21	-0.14	0.06	0.61	1.6	0.85	0	0.59	0.65	0.85	0.8	0.82
A_06_P2660	|| biological process unknown || ATPase activity, coupled to transmembrane movement of substances || YER036C || 1081063	1	-1.86	-1.7	-2.32	-2.27	-2.97	-2.31	-0.18	-1.62	-3.24	-3.09	-1.87	-1.51
A_06_P4714	ECM4 || cell wall organization and biogenesis || molecular function unknown || YKR076W || 1081064	1	3.16	4.05	4.51	4.91	4.82	5.38	0.63	1.31	2.62	2.8	3.42	3.36
A_06_P5423	COX14 || aerobic respiration* || molecular function unknown || YML129C || 1081065	1	1.75	2.25	2.07	3.13		2.4	0.02	2.56	2.07		1.63	1.1
A_06_P6247	THI20 || thiamin biosynthesis || phosphomethylpyrimidine kinase activity* || YOL055C || 1081066	1	0.63	0.79	0.86	1.67	2.21	2.04	0.19	1.09	1.43	1.54	1.66	2.06
A_06_P4339	|| arabinose catabolism* || aldo-keto reductase activity* || YJR096W || 1081068	1	3.54	4.35	4.85	4.21	4.26	3.54	0.46	1.53	4.32	3.98	4.08	4.34
A_06_P5492	KAR5 || karyogamy during conjugation with cellular fusion || molecular function unknown || YMR065W || 1081069	1	-0.09	-0.26	0.12	0.82	0.24	0.14	-0.34	0.37	0.49	0.75	0.31	-0.42
A_06_P5605	ALD2 || aldehyde metabolism* || aldehyde dehydrogenase activity || YMR170C || 1081070	1	1.91	2.61	2.79	3.11	2.85	2.84	0.5	1.66	4.68	4.34	3.22	3.75
A_06_P2113	ECM18 || cell wall organization and biogenesis || molecular function unknown || YDR125C || 1081071	1										-0.28	-0.24
A_06_P1539	|| biological process unknown || molecular function unknown || YBR285W || 1081072	1	4.54	4.17	3.8	5.38			-0.41	3.92	5.74		4.06
A_06_P2238	|| biological process unknown || molecular function unknown || YDR249C || 1081075	1	-1.02	-1.34	-1.32	-0.18	-0.01	-0.39	-0.6	-0.05	0.04	-0.16	0.1	0.21
A_06_P1268	FUR4 || uracil transport || uracil permease activity || YBR021W || 1081076	1	-2.02	-1.18	-2.38	-3.5	-2.99	-2.61	-0.41	-1.71	-3.38	-3.62	-3.08	-3.22
A_06_P4708	|| biological process unknown || molecular function unknown || YKR070W || 1081077	1	0.36	0.47	-0.11	0.25	0.32	-0.62	-0.21	0.84	0.88	0.94	0.75	0.74
A_06_P5638	CLN1 || regulation of cyclin dependent protein kinase activity || cyclin-dependent protein kinase regulator activity || YMR199W || 1081078	1	-1.56	-1	-2.95	-2.6	-2.31	-2.6	0.2	0.88	-0.08	0.05	0.67	0
A_06_P3863	YRB2 || mRNA-nucleus export* || structural molecule activity || YIL063C || 1081079	1	0.68	0.39	0.76	0.47	0.26	-0.03	0.25	0.61	0.3	0.52	0.29	0.48
A_06_P2566	|| biological process unknown || molecular function unknown || YEL025C || 1081080	1	0.64	0.11	0.94	0.26	0.44	-0.13	0.05	0.39	-0.24	0.03	0.14	0.2
A_06_P4699	KTR2 || protein amino acid N-linked glycosylation* || mannosyltransferase activity || YKR061W || 1081081	1	-0.47	-0.24	-0.5	-1.15	-1.35	-1.39	-0.19	-0.16	-0.66	-0.58	-0.19	0.68
A_06_P5095	|| || || YLR280C || 1081082	1	1.18	1.82	2.77	1.61	1.53	1.24	0.26	-0.47	1.57	1.71	1	0.76
A_06_P4861	|| biological process unknown || molecular function unknown || YLR049C || 1081083	1	0.43	-0.04	-0.5	-0.9	-1.56	-1.83	0.17	0.77	0.76	0.41	-0.26	-0.23
A_06_P2415	SIP1 || protein amino acid phosphorylation* || AMP-activated protein kinase activity || YDR422C || 1081084	1	0.76	0.53	1.17	0.95	1.12	1.05	-0.01	-0.55	0.28	0.24	0.39	0.52
A_06_P5159	FKS1 || cell wall organization and biogenesis* || 1,3-beta-glucan synthase activity || YLR342W || 1081085	1	-1.11	-1.61	-3.88	-4.34	-4.48	-3.66	0.16	-0.96	-0.82	-0.83	-1.11	-1.29
A_06_P2372	RGA2 || actin filament organization* || signal transducer activity* || YDR379W || 1081086	1	0.86	0.94	1.07	1.4	1.68	1.13	0.29	0.84	1.31	1.2	1.06	1
A_06_P3995	MUC1 || pseudohyphal growth* || molecular function unknown || YIR019C || 1081089	1	0.32	1.14	2		0.54	0.08	0.24	0.1	0.67		0.01	-0.64
A_06_P4343	|| biological process unknown || molecular function unknown || YJR100C || 1081090	1	0.96	1.12	1.5	1.19	1.42	0.57	0.04	0.83	0.76	0.75	0.71	1.12
A_06_P5071	|| biological process unknown || molecular function unknown || YLR257W || 1081091	1	2.18	1.89	1.43	0.11	-0.79	-0.1	1.39	0.06	2.04	2.31	2.02	2.29
A_06_P4580	MRP49 || protein biosynthesis || structural constituent of ribosome || YKL167C || 1081092	1	1.49	1.67	1.34	2.38	1.89	1.11	0.06	1.81	1.39	1.01	0.75	0.42
A_06_P5488	RNA14 || mRNA polyadenylylation* || RNA binding* || YMR061W || 1081093	1	-0.43	-0.07	0.12	0.03	-0.41	0.02	-0.09	-0.16	-0.62	-0.45	-0.63	-1.26
A_06_P4625	DOA1 || ubiquitin-dependent protein catabolism* || molecular function unknown || YKL213C || 1081094	1	0.81	0.91	0.59	0.51	0.23	-0.02	-0.09	1.23	1.05	0.79	0.33	-0.08
A_06_P5741	ADE4 || 'de novo' IMP biosynthesis* || amidophosphoribosyltransferase activity || YMR300C || 1081095	1	-3.34	-3.1	-3.92	-3.84	-3.84	-3.05	-0.01	-0.7	-3.59	-3.54	-2.78	-3.05
A_06_P1935	MGT1 || DNA dealkylation || methylated-DNA-[protein]-cysteine S-methyltransferase activity || YDL200C || 1081096	1	0.24	-0.04	0.24	1.92	2.63	1.78	-1.03	1.41	2.35	2.12	1.74	1.98
A_06_P1534	|| biological process unknown || molecular function unknown || YBR280C || 1081097	1	3.19	3.07	4.68	4.67	5.13	4.98	0.43	1.5	2.81	2.6	2.64	2.88
A_06_P6524	YRR1 || positive regulation of transcription from RNA polymerase II promoter* || specific RNA polymerase II transcription factor activity || YOR162C || 1081098	1	1.17	1.15	1.94	2.4	2.63	2.78	-0.05	0.28	0.86	0.69	0.73	1.09
A_06_P1651	|| biological process unknown || molecular function unknown || YCR026C || 1081099	1	-0.05	-0.09	0.46	0.84	0.54	0.58	-0.04	0.13	-0.03	0.24	0.28	0.06
A_06_P4823	LOT6 || biological process unknown || FMN reductase activity || YLR011W || 1081100	1	1.2	0.73	1.25	1.99	1.58	0.92	0.26	1.11	1.34	1.28	0.94	0.91
A_06_P2059	IPT1 || sphingolipid biosynthesis* || transferase activity, transferring phosphorus-containing groups || YDR072C || 1081101	1	0.65	0.18	0.6	0.69	0.93	0.37	-0.37	0.11	0.1	0.08	0.13	0.32
A_06_P6920	BEM4 || establishment of cell polarity (sensu Fungi)* || molecular function unknown || YPL161C || 1081102	1	0.23	0	0.53	0.49	0.16	-0.23	0.12	-0.1	0.04	0.12	-0.09	-0.01
A_06_P6551	IES4 || biological process unknown || molecular function unknown || YOR189W || 1081103	1	0.66	0.37	0.3	0.54	0.65	-0.52	0.01	0.92	0.94	0.79	0.3	0.48
A_06_P1824	|| || || YDL094C || 1081104	1
A_06_P2126	HPR1 || mRNA-nucleus export* || nucleic acid binding || YDR138W || 1081105	1	-0.82	-0.43	-0.23	-0.45	-1.03	-0.77	-0.3	-0.81	-0.77	-0.66	-0.75	-1.18
A_06_P4456	|| biological process unknown || molecular function unknown || YKL047W || 1081106	1	-0.55	-0.33	-0.26	-0.31	-0.53	-0.61	-0.26	-0.65	-0.7	-0.71	-0.61	-0.59
A_06_P6763	LSP1 || response to heat || protein kinase inhibitor activity || YPL004C || 1081107	1	3.46	3.79	3.7	4.22	3.41	3.98	0.72	1.53	2.76	2.29	2.2	2.23
A_06_P7228	AOS1 || protein sumoylation || SUMO activating enzyme activity || YPR180W || 1081108	1	0.37	0.57	0.61	0.67	0.55	0.5	0.38	0.47	1.14	1.28	0.47	0.43
A_06_P4374	MNS1 || protein amino acid N-linked glycosylation* || mannosyl-oligosaccharide 1,2-alpha-mannosidase activity || YJR131W || 1081109	1	0.29	0.31	-0.09	-0.09	-0.44	-0.51	0.07	-0.27	-0.33	-0.41	-0.74	-0.96
A_06_P1406	RPB5 || transcription from RNA polymerase II promoter* || DNA-directed RNA polymerase activity || YBR154C || 1081110	1	-2.13	-1.75	-2.76	-2.68	-2.39	-2.36	-0.06	-0.33	-2.77	-2.73	-2.23	-2.04
A_06_P2539	YRF1-1 || telomerase-independent telomere maintenance || DNA helicase activity || YDR545W || 1081111	1	0.89	0.59	0.6	0.4	1.62	1.99	0.05	-0.35	0.31	0.32	0.61	1.95
A_06_P3465	LSC2 || tricarboxylic acid cycle* || succinate-CoA ligase (ADP-forming) activity || YGR244C || 1081112	1	1.73	2.43	2.15	1.81	2.07	1.69	0.73	0.49	2.18	2.29	1.73	1.4
A_06_P1032	MDM10 || protein complex assembly* || molecular function unknown || YAL010C || 1081113	1	0.66	0.55	0.65	1.18	0.87	-0.1	-0.11	0.61	0.93	0.63	0.47	-0.26
A_06_P2418	SNX41 || protein transport || protein transporter activity || YDR425W || 1081114	1	1.5	1.15	2.51	2.71	2.78	2.5	0.47	1.16	2.19	2.04	1.59	1.41
A_06_P5067	|| biological process unknown || molecular function unknown || YLR253W || 1081115	1	0.19	0.46	0.36	0.16	-0.03	-0.35	0.26	0.41	-0.08	-0.04	-0.24	-0.15
A_06_P4876	|| biological process unknown || molecular function unknown || YLR064W || 1081116	1	-0.25	0.34	0.17	0.43	0.4	0.4	0.07	0.52	0.46	0.21	0.35	0.26
A_06_P6833	YTA6 || biological process unknown || ATPase activity || YPL074W || 1081117	1	0.25	0.3	1.3	1.36	1.68	0.87	0.32	0.05	0.37	0.64	0.42	1.01
A_06_P6036	PDR17 || response to drug* || phosphatidylinositol transporter activity || YNL264C || 1081118	1	0.11	0.13	-0.2	-0.3	-0.33	-1.01	-0.36	0.13	0.51	0.1	-0.2	-1.03
A_06_P1087	FLO9 || flocculation (sensu Saccharomyces) || mannose binding || YAL063C || 1081119	1				0.07
A_06_P2469	|| biological process unknown || molecular function unknown || YDR476C || 1081120	1	0.23	0.46	1.02	0.28	-0.15	0.08	0.01	-1.31	0.31	0.31	0.07	-0.58
A_06_P1691	CPR4 || biological process unknown || peptidyl-prolyl cis-trans isomerase activity || YCR069W || 1081122	1	0.74	0.73	0.62	0.65	0.2	0.96	0.14	0.34	0.93	1.04	0.93	0.92
A_06_P3839	|| biological process unknown || molecular function unknown || YIL039W || 1081123	1	-0.67	-0.51	-1.13	-0.92	-2.09	-2.03	-0.11	-0.1	-0.41	-0.42	-0.6	-1.41
A_06_P3478	MTM1 || transport* || transporter activity* || YGR257C || 1081125	1	0.15	-0.04	0.08	0.77	0.44	0.14	-0.33	0.89	-0.09	-0.25	-0.2	-0.26
A_06_P4415	LAC1 || ceramide biosynthesis* || sphingosine N-acyltransferase activity || YKL008C || 1081126	1	-0.59	-0.66	-1.06	-1.31	-1.27	-1.42	-0.45	-0.08	1.1	1.45	1.23	0.69
A_06_P1800	|| || || YDL071C || 1081127	1	-0.04		0.31	0.31	0.04	0.31	0.03	-0.95	0.3	0.25	-0.11	-0.41
A_06_P2882	AAD6 || aldehyde metabolism || aryl-alcohol dehydrogenase activity || YFL056C || 1081128	1	-0.43	0.3	1.6	0.95	-0.05	1.28	0.02	-1.28	-0.66	-0.22	-0.24	0.45
A_06_P4549	|| biological process unknown || molecular function unknown || YKL137W || 1081129	1	1.15	1.54	1.12	1.98	2.59	1.2	-0.61	1.7	1.44		0.99	0.79
A_06_P4817	SSL1 || transcription initiation from RNA polymerase II promoter* || general RNA polymerase II transcription factor activity || YLR005W || 1081131	1	-0.13	0.11	0.64	0.66	-0.04	0.64	0.28	-1.08	0.3	0.47	0.32	-0.18
A_06_P1322	|| proteolysis and peptidolysis || metalloendopeptidase activity || YBR074W || 1081132	1		-0.7	-0.98	-3.24		-2.84	0.05	-3.38	-1.97	-1.6	-2.37
A_06_P4670	|| || || YKR033C || 1081134	1	0.92		-0.75				1.27	0.41	2.24		1.81	1.6
A_06_P5490	RIM9 || sporulation (sensu Fungi) || molecular function unknown || YMR063W || 1081135	1	-1.01	-0.72	-0.28	-1.6		-1.18	-0.31		-1.16	-0.79	-1.01
A_06_P5452	MRPL3 || protein biosynthesis || structural constituent of ribosome || YMR024W || 1081136	1	0.12	0.76	0.5	-0.13	-0.41	-0.84	0.01	0.61	-0.48	-0.42	-0.61	-0.65
A_06_P2014	|| || || YDR029W || 1081137	1	1.2	0.02	-0.2	-1.05		-1.05	-0.09	-0.57			-0.88	-0.73
A_06_P3090	RPL1B || protein biosynthesis || structural constituent of ribosome || YGL135W || 1081139	1	-0.98	-1.97	-4.58	-3.97	-3.88	-1.69	-0.24	0.18	-2.72	-3.87	-2.79	-1.82
A_06_P2873	RGD2 || small GTPase mediated signal transduction || Rho GTPase activator activity || YFL047W || 1081140	1	-0.82	-0.44	-0.75	-1.05	-1.44	-1.55	-0.13	-0.44	-1.08	-0.84	-1.1	-1.59
A_06_P3430	TRX2 || ER to Golgi transport* || thiol-disulfide exchange intermediate activity || YGR209C || 1081141	1	1.54	2.1	0.71	1.97	2.09	2.09	-0.05	1.79	1.76	1.39	1.53	2.28
A_06_P5337	|| biological process unknown || molecular function unknown || YML050W || 1081142	1	0.52	1.16	1.28	0.69	1	0.05	-0.33	0.26	-0.36	-0.56	-0.41	-0.13
A_06_P5561	|| biological process unknown || molecular function unknown || YMR130W || 1081143	1	-0.6	-0.55	-1.51	-1.25	-0.44	-1.34	0.15	1.03	0.45	0.55	0.17	0.42
A_06_P1004	AI1 || mRNA processing* || endonuclease activity* || Q0050 || 1081144	1	0.4	0.12	1.36	1.64	4.33	2.75	0.46	0.58	1.59	1.44	1.05	0.92
A_06_P5767	SNO4 || pyridoxine metabolism || unfolded protein binding* || YMR322C || 1081145	1	1.24	2.56	4.18	5.53	6.64	6.59	-0.07	1.26		3.12	4.1	5.01
A_06_P4857	STU2 || mitotic spindle organization and biogenesis in nucleus* || structural constituent of cytoskeleton* || YLR045C || 1081146	1	0.16	-0.53	-1.38	-1.42	-1.77	-1.44	-0.06	0.09	0.18	0.59	0.35	-0.02
A_06_P2430	|| GPI anchor biosynthesis || UDP-glycosyltransferase activity || YDR437W || 1081147	1		0	0.3			-0.43	0.01		-0.71		-0.42
A_06_P6970	SRP72 || protein-ER targeting* || signal sequence binding || YPL210C || 1081148	1	-0.82	-0.51	-0.94	-1.03	-1.52	-1.5	-0.11	-0.24	-0.82	-0.77	-0.95	-1.6
A_06_P1837	MSS2 || protein complex assembly* || protein translocase activity || YDL107W || 1081149	1	1.24	1.33	1.25	1.76	2.2	1.06	-0.11	1.71	1.29	1.24	1.19	1.4
A_06_P5906	FPR1 || ribosome assembly || peptidyl-prolyl cis-trans isomerase activity || YNL135C || 1081150	1	0.43	0.86	-0.24	0.92	0.65	1.55	-0.3	1.04	0.81	0.72	0.61	0.5
A_06_P4468	TOA2 || transcription initiation from RNA polymerase II promoter || general RNA polymerase II transcription factor activity || YKL058W || 1081151	1	0.18	0.34	0.2	0.03	0.43	0.57	0.1	-0.22	0.26	0.36	0.31	0.29
A_06_P5585	|| || || YMR153C-A || 1081153	1				1.05				0				0.6
A_06_P4360	STE24 || peptide pheromone maturation || metalloendopeptidase activity* || YJR117W || 1081154	1	-0.29	0.48	0.27	0.46	-0.05	0.66	-0.22	-0.01	0.22	0.09	0.33	-0.47
A_06_P4215	|| biological process unknown || molecular function unknown || YJL193W || 1081155	1	-2.1	-1.55	-2.78	-3.04	-2.53	-3.24	-0.31	-0.48	-0.97	-1.07	-1.12	-2.06
A_06_P6053	HCH1 || response to stress* || chaperone activator activity || YNL281W || 1081156	1	-1	0.15	-0.41	0.03	-0.15	-0.23	-0.13	0.65	-0.22	-0.08	0.29	0.49
A_06_P5065	SYM1 || ethanol metabolism || molecular function unknown || YLR251W || 1081158	1	3.48		3.76	3.47	3.6	2.81	1.59	2.02	4.1		3.15	3.4
A_06_P6295	TPT1 || tRNA splicing || tRNA 2'-phosphotransferase activity || YOL102C || 1081159	1	-0.18	-0.76	-0.96	-0.1	0.45	0.1	-0.18	0.72	-0.09	0.15	0.12	0.7
A_06_P3633	VMA22 || protein complex assembly* || unfolded protein binding || YHR060W || 1081160	1	0	0.2	0.09	0.01	0.77	0.09	0.64	0.48	-0.02	0.25	-0.01	0.59
A_06_P1678	RSC6 || chromatin remodeling || molecular function unknown || YCR052W || 1081161	1	-0.76	-0.69	-0.97	-1.73	-2.05	-1.51	-0.12	-1	-1.35	-1.22	-1.7	-2.04
A_06_P6200	RCL1 || rRNA processing || molecular function unknown* || YOL010W || 1081162	1	-4.61	-3.77	-4.06	-3.19	-3.06	-2.27	-0.71	-0.74	-4.52	-4.62	-2.72	-2.32
A_06_P4726	|| biological process unknown || molecular function unknown || YKR088C || 1081163	1	0.24	-0.06	-0.25	0.76	-0.29	-0.3	-0.24	0.92	1.08	0.98	0.69	-0.35
A_06_P4786	SDH2 || tricarboxylic acid cycle* || succinate dehydrogenase (ubiquinone) activity || YLL041C || 1081164	1	2.67	2.88	4.24	4.36	3.63	3.74	0.26	1.43	1.99	1.86	2.11	1.52
A_06_P2299	SUM1 || chromatin silencing at telomere* || transcriptional repressor activity || YDR310C || 1081165	1	-0.59	-0.42	-0.21	-1.27	-1.42	-0.35	0.04	-1.04	-1.12	-0.89	-0.76	-0.68
A_06_P1518	YPT10 || Golgi organization and biogenesis || GTPase activity* || YBR264C || 1081166	1	0.6	0.1	0.44	0.67	1.04	0.23	-0.21	0.97	1.01	1.11	0.83	0.81
A_06_P6199	MDM12 || mitochondrion organization and biogenesis* || molecular function unknown || YOL009C || 1081167	1	1.06	0.86	1.36	1.39	1.05	0.77	-0.02	0.21	0.58	0.48	0.35	0.48
A_06_P4410	AUR1 || sphingolipid metabolism || inositol phosphoceramide synthase activity || YKL004W || 1081168	1	-1.44	-1.51	-1.55	-1.02	-1.41	-0.83	-0.1	-1.37	-1.78	-1.65	-1.13	-1.84
A_06_P3168	SKI8 || protein complex assembly* || translation repressor activity || YGL213C || 1081169	1	0.2	-0.53	-0.92	-0.62	-0.73	-1.45	-0.26	0.81	0.96	0.76	0.17	-0.26
A_06_P7083	ERV2 || protein thiol-disulfide exchange || thiol oxidase activity || YPR037C || 1081170	1	0.46	0.62	-0.95	-0.67	0.21	0.62	0.3	0.1	0.7	0.93	0.7	1.17
A_06_P5032	|| biological process unknown || molecular function unknown || YLR218C || 1081171	1	2.46	2.7	1.87	2.05	2.56	1.72	0.52	2.3	2.27	2.3	1.78	2.31
A_06_P2525	|| coenzyme A biosynthesis || pantothenate kinase activity || YDR531W || 1081172	1	-0.8	-0.91	-1.11	-0.41	0.25	-0.56	-0.19	-0.19	-0.62	-0.75	-0.87	-1.41
A_06_P2534	|| biological process unknown || molecular function unknown || YDR540C || 1081173	1			0.13				-0.11	0.82	2.64		1.61	0.09
A_06_P3543	SNF6 || chromatin remodeling || general RNA polymerase II transcription factor activity || YHL025W || 1081175	1	0.7	0.29	0.86	0.56	0.52	0.59	-0.06	0.38	0.44	0.52	0.42	0.8
A_06_P1366	RAD16 || nucleotide-excision repair, DNA damage recognition || DNA-dependent ATPase activity || YBR114W || 1081176	1	1.35	0.92	0.27	-0.46	0.72	0.23	-0.03	0.54	1.33	1.25	1.02	1.7
A_06_P6493	|| biological process unknown || molecular function unknown || YOR131C || 1081177	1	0.69	0.44	-0.04	0.04	-0.11	-0.77	0.02	0.87	0.83	0.65	0.37	0.33
A_06_P5239	RPN13 || proteolysis and peptidolysis || endopeptidase activity || YLR421C || 1081178	1	0.51	0.26	0.19	0.6	0.91	0.37	-0.17	0.38	1.09	0.88	0.56	0.28
A_06_P4780	GRC3 || rRNA processing || molecular function unknown || YLL035W || 1081179	1	-3.07	-2.64	-3.32	-1.92	-1.55	-1.97	-0.81	-0.88	-2.61	-2.51	-1.71	-1.48
A_06_P1679	THR4 || endocytosis* || threonine synthase activity || YCR053W || 1081180	1	-1.22	-1.3	-2.81	-2.6	-2.59	-2.43	-0.21	-0.22	-1.82	-2.08	-1.67	-1.91
A_06_P1056	FUN19 || biological process unknown || molecular function unknown || YAL034C || 1081181	1	2.75	2.48	3.96	3.53	2.91	3.58	0.27	-0.35	1.34	1.44	1.76	2.02
A_06_P3911	HOS4 || histone deacetylation* || NAD-dependent histone deacetylase activity* || YIL112W || 1081182	1	-0.09	0.26	0.83	0.62	0.45	0.64	0.17	-0.29	-0.11	0.17	0.2	0.01
A_06_P2495	SAM2 || methionine metabolism || methionine adenosyltransferase activity || YDR502C || 1081183	1	-1.22	-0.75	-3.83	-3.46	-4.74	-3.72	0.33	0.38	0.03	-0.53	-0.95	-2.49
A_06_P3059	VPS73 || protein-vacuolar targeting || molecular function unknown || YGL104C || 1081184	1	2.22	2.63	2.81	2.61	1.88	1.83	0.05	1.01	2.02	1.66	1.43	0.7
A_06_P4975	|| biological process unknown || molecular function unknown || YLR161W || 1081185	1	1.17	0.84	1.75	0.62	0.79	1.31	0.07	-0.9	1.25	1.48	0.93	1.09
A_06_P6829	MUK1 || regulation of transcription || molecular function unknown || YPL070W || 1081186	1	0.49	0.59	1.01	0.32	-0.33	-0.1	0.04	-0.32	0.32	0.18	-0.21	-0.54
A_06_P6754	|| biological process unknown || molecular function unknown || YOR390W || 1081187	1	-1.25	-0.83	-1.13	-2.25	-1.4	-1.37	0.16	-1.85	-0.55	-0.49	-1.11	-1.22
A_06_P3540	SPO11 || meiotic DNA double-strand break formation || endodeoxyribonuclease activity, producing 3'-phosphomonoesters || YHL022C || 1081188	1							-0.17
A_06_P5332	PRP39 || nuclear mRNA splicing, via spliceosome || RNA binding || YML046W || 1081190	1	-1.03	-0.84	-1.08	-1.62	-1.4	-1.5	0.49	-0.64	-1.31	-1.09	-1.37	-1.8
A_06_P1008	AI5_ALPHA || movement of group I intron || endonuclease activity || Q0070 || 1081191	1	-0.3	0.15	1.76	-0.55	1	2.58	1.79	-2.52	-0.84	0.25	-0.34	1.16
A_06_P4542	SHE2 || intracellular mRNA localization || mRNA binding || YKL130C || 1081192	1	-0.52	-0.22	-0.69	-0.75	-0.92	-0.78	0.32	0.11	-0.16	-0.14	-0.21	-0.5
A_06_P3621	|| || || YHR049C-A || 1081194	1
A_06_P2167	CSN9 || adaptation to pheromone during conjugation with cellular fusion* || molecular function unknown || YDR179C || 1081195	1	-0.71	-1.62	-1.63	0.9	1.56	1.24	-0.31	1.08	0.61	1.17	1.54	1.76
A_06_P4763	COX19 || cytochrome c oxidase complex assembly* || metal ion transporter activity || YLL018C-A || 1081196	1	0.8	0.81	1.98	0.5	-0.08	0.03	-0.32	-1.81	-0.52	-0.43	-0.84	-0.7
A_06_P5844	MSK1 || lysyl-tRNA aminoacylation || lysine-tRNA ligase activity || YNL073W || 1081197	1	1.08	1.5	1.46	-0.13	0.82	0.22	0.31	-0.59	0.58	0.45	0.45	0.57
A_06_P6429	ALG8 || protein amino acid N-linked glycosylation* || dolichyl pyrophosphate Glc1Man9GlcNAc2 alpha-1,3-glucosyltransferase activity || YOR067C || 1081198	1	-1	-0.52	-1.69	-2.32	-2.04	-2.33	-0.17	-0.76	-0.41	-0.7	-1.13	-2.1
A_06_P3551	RPL8A || protein biosynthesis || structural constituent of ribosome || YHL033C || 1081199	1	-1.29	-1.85	-4.56	-4.66	-5.51	-2.56	-0.06	-0.48	-3.63	-4.96	-3.29	-2.67
A_06_P4448	PTM1 || biological process unknown || molecular function unknown || YKL039W || 1081200	1	0.64	0.97	0.92	0.78	0.19	0.21	0.02	0.5	0.71	0.61	0.55	0.46
A_06_P3406	TYS1 || tyrosyl-tRNA aminoacylation || tyrosine-tRNA ligase activity || YGR185C || 1081202	1	-1.37	-0.99	-2.22	-2.59	-3.1	-2.92	-0.03	-0.42	-0.86	-1.01	-1.21	-2.05
A_06_P5218	|| || || YLR400W || 1081203	1
A_06_P2603	CIN8 || mitotic sister chromatid segregation* || microtubule motor activity || YEL061C || 1081204	1	-0.61	-0.92	-0.73	-0.36	-0.72	-0.84	0.44	0.68	0.08	0.56	0.25	-0.39
A_06_P7000	HSP82 || response to stress* || ATPase activity, coupled || YPL240C || 1081205	1	1.52	4.46	4.23	3.29	2.79	3.69	0.49	2.08	2.33	2.48	2.86	3.33
A_06_P2054	|| biological process unknown || molecular function unknown || YDR067C || 1081206	1	0.73	0.23	0.82	1.67	2.05	1.03	0.3	1.24	0.62	0.73	0.16	0.79
A_06_P4917	|| biological process unknown || molecular function unknown || YLR104W || 1081207	1	-0.3	-0.34	-1.28	-0.5	-1.18	-1.03	-0.26	0.77	0.02	-0.17	-0.66	-0.72
A_06_P2718	|| biological process unknown || proline-tRNA ligase activity || YER087W || 1081209	1	1.36	1.67	1.53	1.24	1.31	0.24	-0.17	1.47	1.04	1.06	0.81	0.71
A_06_P3897	FMC1 || protein complex assembly || molecular function unknown || YIL098C || 1081210	1	1.59	2.16	1.9	0.68	1.16	0.55	0.24	0.53	1.31	1.2	0.77	0.85
A_06_P1508	TRS20 || ER to Golgi transport || molecular function unknown || YBR254C || 1081211	1	-1.11	-0.78	-1.54	-2.43	-1.24	-1.62	0.41	-1.33	-0.03	0.09	-0.25	-0.2
A_06_P4095	JEM1 || protein folding* || unfolded protein binding* || YJL073W || 1081212	1	-1.25	-1.18	-1.61	-1.44		-1.59	0.18	-0.32	-0.87	-0.88	-0.61	-1.25
A_06_P6033	ORC5 || DNA replication initiation* || ATPase activity* || YNL261W || 1081213	1	-0.49	-0.19	-0.99	-0.6	-0.6	-1.03	-0.28	0.28	-0.14	-0.13	-0.22	-0.41
A_06_P5620	SSO2 || vesicle fusion* || t-SNARE activity || YMR183C || 1081214	1	-0.79	-0.36	-0.33	-1.3	-1.83	-0.95	-0.32	-1.52	-0.8	-0.43	-0.51	-0.87
A_06_P3450	SMI1 || cell wall organization and biogenesis* || molecular function unknown || YGR229C || 1081215	1	-0.58	-0.77	-1.5	-2.56	-2.4	-3.07	0.04	-0.24	-0.8	-0.64	-0.54	-0.44
A_06_P3454	PHO81 || phosphate metabolism || cyclin-dependent protein kinase inhibitor activity || YGR233C || 1081216	1	0.07	0.15	0.42	-0.15	-0.1	-0.06	0.64	-0.48	0.36	0.65	0.41	0.66
A_06_P5455	|| biological process unknown || molecular function unknown || YMR027W || 1081217	1	0.72	1.04	0.92	0.63	0.33	0.5	0.18	0.08	0.71	0.68	0.44	0.23
A_06_P4009	DAL3 || allantoin catabolism || ureidoglycolate hydrolase activity || YIR032C || 1081218	1	-1.17	-1.16	-2.44	-2.18	-2.34	-2.15	0.57	-0.57	0.24	-0.14	-0.3	-0.55
A_06_P2055	DOS2 || biological process unknown || molecular function unknown || YDR068W || 1081219	1	0.36	-0.05	0.24	0.36	0.51	0.21	0.15	0.34	-0.13	0.12	-0.06	0.17
A_06_P2193	COQ4 || ubiquinone metabolism || molecular function unknown || YDR204W || 1081220	1	1.7	2.33	3.07	2.68	2.29	2.83	-0.05	0.21	1.83	1.88	1.49	1.49
A_06_P6711	PYK2 || pyruvate metabolism || pyruvate kinase activity || YOR347C || 1081221	1	1.73	0.96	0.83	0.61	0.05	-0.14	0.3	-0.04	0.54	-0.44	-0.26	-0.57
A_06_P2942	|| biological process unknown || molecular function unknown || YFR044C || 1081222	1	0.4	1.45	0.51	0	-0.74	-0.45	0.4	-0.38	0.73	0.72	0.14	-0.17
A_06_P2543	YEA4 || cell wall chitin biosynthesis* || UDP-N-acetylglucosamine transporter activity || YEL004W || 1081223	1	0.61	0.69	0.99	0.83	0.36	0.91	-0.26	0.07	0.04	-0.12	-0.38	-1.42
A_06_P1375	TFC1 || transcription initiation from RNA polymerase III promoter || RNA polymerase III transcription factor activity || YBR123C || 1081224	1	0.27	0.03	0.13	0.65	0.37	0.18	-0.14	0.8	0.58	0.57	0.43	0.11
A_06_P5677	DFG5 || pseudohyphal growth* || molecular function unknown || YMR238W || 1081225	1	-0.02	-0.39	-1.19	-1.33	-2.04	-1.05	0.29	0.43	0.38	0.34	0.28	0.82
A_06_P2340	YPS7 || biological process unknown || aspartic-type endopeptidase activity || YDR349C || 1081226	1	-0.7	-0.71	-0.66	-0.59	-0.83	-0.68	-0.13	-0.24	-0.67	-0.54	-0.35	-0.46
A_06_P5522	UTP15 || processing of 20S pre-rRNA || snoRNA binding || YMR093W || 1081227	1	-4.52	-3.19	-5.16	-4.11	-3.79	-3.62	-0.75	-0.56	-5.06	-5.15	-2.96	-2.46
A_06_P5497	MOT3 || transcription || DNA binding* || YMR070W || 1081228	1	-0.18	-0.15	-0.31	0.13	0.63	-0.15	0.14	0.85	0.72	0.96	0.66	0.51
A_06_P2195	EBS1 || telomerase-dependent telomere maintenance || molecular function unknown || YDR206W || 1081229	1	-1.03	-0.71	-0.35	-0.46	-0.58	0.12	-0.09	-1.22	-1.18	-0.87	-0.82	-0.91
A_06_P5326	|| biological process unknown || molecular function unknown || YML036W || 1081230	1	-0.42	-0.85	-2.15	-1.92			0.16	0.64	0.51	0.28	-0.57	-0.7
A_06_P3181	OST5 || protein amino acid N-linked glycosylation || dolichyl-diphosphooligosaccharide-protein glycotransferase activity || YGL226C-A || 1081231	1	-0.49	-0.55	-1.3	-2.23	-2.58	-2.17	0.1	-0.49	-1.1	-1.01	-1.27	-1.56
A_06_P5879	|| metabolism || molecular function unknown || YNL108C || 1081232	1	-1.43	-1.6	-2.04	-1.69	-1.79	-2.41	-0.53	-0.03	-0.38	-0.49	-0.8	-1.18
A_06_P3483	BUD32 || protein amino acid phosphorylation* || protein serine/threonine kinase activity || YGR262C || 1081233	1	-0.7	-0.71	-1.22	-0.19	-0.42	-0.34	-0.38	0.47	-0.04	-0.04	-0.08	-0.3
A_06_P5990	MGS1 || DNA replication* || ATPase activity* || YNL218W || 1081234	1	-0.69	-0.98	-0.71	-0.69	-0.93	-0.22	0.08	-1.16	-0.55	-0.21	-0.26	0.15
A_06_P3257	ACB1 || fatty acid metabolism* || long-chain fatty acid transporter activity* || YGR037C || 1081235	1	-0.05	0.95	-0.14	-0.56	0.04	-0.34	0.65	0.69	-0.01	-0.06	0.19	0.28
A_06_P6290	WRS1 || tryptophanyl-tRNA aminoacylation || tryptophan-tRNA ligase activity || YOL097C || 1081236	1	-2	-2	-3.81	-3.76	-4.19	-3.48	-0.35	-0.64	-1.79	-2.04	-2.12	-3.2
A_06_P1522	MRPL37 || protein biosynthesis || structural constituent of ribosome || YBR268W || 1081237	1	0.17	1.05	0.13	0.38	0.47	-0.12	-0.19	1.23	0.04	-0.06	-0.01	0.37
A_06_P2480	RIB3 || aerobic respiration* || 3,4-dihydroxy-2-butanone-4-phosphate synthase activity || YDR487C || 1081238	1	-0.31	-0.46	-1.03	-0.84	-0.65	-0.89	-0.02	0.16	-0.5	-0.32	-0.56	-0.29
A_06_P2693	THO1 || transcription, DNA-dependent || molecular function unknown || YER063W || 1081240	1	0.24	0.23	0.08	-0.38	-0.88	-0.63	0.33	-0.28	0.31	0.38	0.03	-0.25
A_06_P5691	|| biological process unknown || molecular function unknown || YMR252C || 1081241	1	0.95	1	1.25	1.22	0.72	1.93	-0.04	0.19	1.67	1.97	1.78	2.51
A_06_P2697	|| biological process unknown || molecular function unknown || YER066W || 1081242	1	2.06	1.85	2.48	3	3	2.58	0.01	1.07	2.17	2.03	1.4	1.57
A_06_P2928	RPL2A || protein biosynthesis || structural constituent of ribosome || YFR031C-A || 1081243	1	-0.72	-1.51	-4.13	-4.35	-5.37	-2.73	-0.31	-0.75	-3.37	-4.89	-3.22	-2.48
A_06_P5445	SPO20 || spore wall assembly (sensu Fungi)* || t-SNARE activity || YMR017W || 1081244	1		1.45	2.38	3.56			0.11	1.52			1.57
A_06_P3405	UBR1 || protein monoubiquitination* || ubiquitin-protein ligase activity || YGR184C || 1081245	1	0.36	0.45	0.76	1.01	1.02	1.53	0.15	0.26	0.44	0.57	0.69	1.38
A_06_P3238	|| || || YGR018C || 1081246	1
A_06_P6629	|| biological process unknown || molecular function unknown || YOR268C || 1081247	1	0.04	-0.37	-0.53				0
A_06_P2764	RPS26B || protein biosynthesis || structural constituent of ribosome || YER131W || 1081248	1	-0.54	-2.59	-4.32	-3.79	-4.86	-2.53	-0.15	-0.25	-3.68	-5.18	-3.22	-2.18
A_06_P3223	CUL3 || ubiquitin-dependent protein catabolism || protein binding* || YGR003W || 1081249	1	-1.52	-1.47	-1.41	-0.28	-1.07	-0.54	-0.17	-1.08	-1.03	-0.92	-0.7	-0.53
A_06_P6388	BUB3 || mitotic spindle checkpoint || molecular function unknown || YOR026W || 1081250	1	-0.65	-0.8	-1.16	-0.52	-1.23	-1.18	-0.4	0.36	0.29	0.48	0.04	-0.16
A_06_P4558	AVT3 || neutral amino acid transport || neutral amino acid transporter activity || YKL146W || 1081251	1	0.79	0.79	2.47	1.52	0.63	1.12	0.14	-1.39	-0.26	-0.2	-0.21	-0.49
A_06_P6653	|| biological process unknown || molecular function unknown || YOR292C || 1081252	1	1.97	1.7	1.39	1.69	2.32	1.7	-0.09	1.1	2.28	2.28	2.24	2.63
A_06_P1887	MSH5 || meiotic recombination || molecular function unknown || YDL154W || 1081253	1	-0.03	-0.05	0.45	0.69	1.36	0.66	-0.38	0.43	0.11	0.58	0.46	1
A_06_P2031	HEM13 || heme biosynthesis || coproporphyrinogen oxidase activity || YDR044W || 1081254	1	-0.37	-0.24	-1.77	-2.34		-2.74	-0.4	0.04	0.49	0.66	0.3	-0.47
A_06_P3842	|| biological process unknown || kinase activity || YIL042C || 1081255	1	1.38	1.34	2.11	1.93	1.71	1.72	0.09	0.72	1.52	1.78	1.48	1.15
A_06_P3586	YSC84 || endocytosis* || molecular function unknown || YHR016C || 1081256	1	2.74	3.16	2.91	2.15	1.59	1.51	0.27	0.78	2.71	2.47	1.95	1.34
A_06_P4326	CSN12 || adaptation to pheromone during conjugation with cellular fusion || molecular function unknown || YJR084W || 1081257	1	0.16	-0.03	0.14	-0.28	-1.03	-0.93	-0.08	-0.15	0.51	0.39	-0.04	-0.4
A_06_P1828	SNU23 || nuclear mRNA splicing, via spliceosome || RNA splicing factor activity, transesterification mechanism || YDL098C || 1081259	1	-0.3	-0.59	-0.99	-0.57	-0.51	-0.62	-0.17	0.55	-0.01	-0.19	-0.02	-0.12
A_06_P5340	|| biological process unknown || molecular function unknown || YML053C || 1081260	1	0.64	0.93	0.81	0.77	0	0.76	-0.2	0.59	0.36	0.58	0.46	-0.5
A_06_P6284	SPO21 || meiosis* || structural molecule activity || YOL091W || 1081261	1				-0.2	1.24				-0.41		-0.23	-0.71
A_06_P4994	SAM1 || methionine metabolism || methionine adenosyltransferase activity || YLR180W || 1081262	1	-1.41	-3.17	-3.84	-4.78	-5.37	-4.5	-0.3	-1.55	-2.95	-3.41	-3.11	-3.97
A_06_P5176	ADE13 || 'de novo' IMP biosynthesis* || adenylosuccinate lyase activity || YLR359W || 1081263	1	-0.57	-2	-3.19	-2.67	-3.13	-2.3	-0.35	-0.74	-2.73	-2.9	-2.51	-2.79
A_06_P4736	UBP11 || biological process unknown || ubiquitin-specific protease activity || YKR098C || 1081264	1	3.44	2.65	3.15	2.77	2.72	1.21	0.67	1.73	2.2	2.06	1.46	0.94
A_06_P6104	THI12 || thiamin biosynthesis || molecular function unknown || YNL332W || 1081265	1	0.06	0.44	0.79	2.14	1.48	1.87	-0.42	0.6			0.37	1.05
A_06_P4353	YMR1 || vesicle-mediated transport* || phosphoric monoester hydrolase activity* || YJR110W || 1081266	1	0.53	0.5	0.08	0.25	0.96	0.39	0.22	0.81	0.69	0.94	0.7	0.91
A_06_P1597	|| biological process unknown || molecular function unknown || YCL045C || 1081267	1	-0.7	-0.4	-1.13	-1.19	-1.67	-1.55	0.14	-0.26	-0.73	-0.67	-0.88	-1.32
A_06_P3163	SIP2 || protein amino acid phosphorylation* || AMP-activated protein kinase activity || YGL208W || 1081268	1	2.65	2.42	4.67	3.61	2.96	2.98	0.34	0.93	1.57	1.66	1.36	1.45
A_06_P5873	POL1 || DNA replication initiation* || alpha DNA polymerase activity || YNL102W || 1081269	1	-1.59	-2.28	-3.17	-3.03		-2.19	0.02	-0.47	-0.9	-1.09	-0.89	-0.77
A_06_P7240	AQY1 || sporulation (sensu Fungi)* || water channel activity || YPR192W || 1081270	1	2.73			4.61		3.65	0.64	-0.04			2.38
A_06_P3634	GIC1 || establishment of cell polarity (sensu Fungi)* || small GTPase regulator activity || YHR061C || 1081271	1	-0.35	-0.08	-1.23	-1.9	-1.17	-1.02	0.53	-0.83	0.27	0.85	0.75	0.35
A_06_P4309	TOR1 || meiosis* || protein binding* || YJR066W || 1081272	1	0.25	0.49	0.43	1.02	0.83	0.83	0.11	0.17	1.18	1.22	1.1	1.03
A_06_P4523	|| || || YKL111C || 1081273	1		0.07	-0.16				0.73	-0.26		-0.37	-0.25	-0.17
A_06_P1315	TIP1 || cell wall organization and biogenesis || structural constituent of cell wall* || YBR067C || 1081274	1	-0.92	0.6	0.73	2.54	3.94	4.3	-0.22	-0.58	-0.52	-0.91	0.24	-0.71
A_06_P2668	SAH1 || methionine metabolism* || adenosylhomocysteinase activity || YER043C || 1081275	1	-1.39	-1.57	-4.34	-4.54	-5.33	-4.99	0.46	-0.16	-1.85	-2.01	-1.79	-2.32
A_06_P4103	ARP4 || regulation of transcription from RNA polymerase II promoter* || chromatin binding* || YJL081C || 1081277	1	-0.47	-0.39	-0.34	-0.59	-0.6	-0.55	0	-0.47	-0.55	-0.27	-0.59	-1.07
A_06_P1237	|| biological process unknown || molecular function unknown || YBL104C || 1081278	1	-0.93	-0.44	-0.2	0.3	-0.18	0.34	0.06	-0.47	0.04	0.07	-0.01	-0.17
A_06_P1656	RPS14A || protein biosynthesis* || structural constituent of ribosome* || YCR031C || 1081279	1	-1.85	-1.8	-3.54	-3.6	-3.18	-1.86	-0.1	-0.22	-2.37	-3.18	-1.86	-1.36
A_06_P4440	IXR1 || DNA repair || DNA binding || YKL032C || 1081280	1	0.74	0.6	1.45	-0.08	-0.29	0.53	0.72	-0.99	-0.25	0.13	-0.5	-1.06
A_06_P6913	PEP4 || sporulation* || endopeptidase activity* || YPL154C || 1081281	1	1.43	2.56	2.22	1.51	0.58	1.3	0.53	0.27	1.91	1.92	1.34	1.17
A_06_P4611	PTK1 || polyamine transport || protein kinase activity || YKL198C || 1081282	1	-0.21	-0.2	0.3	-0.64	0.78	1.8	0.22	-2.05	-0.08	1.15	-0.23	0.79
A_06_P4661	DBP7 || 35S primary transcript processing* || ATP-dependent RNA helicase activity || YKR024C || 1081283	1	-4.86	-3.77	-4.41	-3.15	-2.41	-1.95	-1.01	-2.21	-5.53	-4.97	-2.73	-1.82
A_06_P5622	|| biological process unknown || molecular function unknown || YMR185W || 1081284	1	-2.44	-2.99	-2.15	-0.53	-0.28	-0.39	-0.18	-1.18	-3.19	-1.88	-0.69	0.3
A_06_P1701	|| biological process unknown || molecular function unknown || YCR082W || 1081285	1	0.14	0.66	0.5	0.72	1.37	1.42	0.12	-0.35	0.05	0.18	0.31	0.33
A_06_P3252	GSC2 || cell wall organization and biogenesis* || 1,3-beta-glucan synthase activity || YGR032W || 1081286	1	0.45	0.35	1.74	2.71	2.92	3.33	0.26	1.15	1.63	2.83	3.33	4.04
A_06_P3900	XBP1 || response to stress || transcription factor activity || YIL101C || 1081287	1	3.54	2.8	3.26	1.97	3.67	2.85	1.11	0.9	1.77	1.92	1.61	2.59
A_06_P1582	HIS4 || histidine biosynthesis || phosphoribosyl-ATP diphosphatase activity* || YCL030C || 1081288	1	-0.4	-0.98	-3.4	-3.3	-3.78	-3.52	0.22	-0.18	-1.99	-2.81	-2.69	-3.31
A_06_P2631	NTF2 || protein-nucleus import* || Ran GTPase binding || YER009W || 1081289	1	-0.63	-0.71	-2.3	-1.45	-0.94	-1.29	0.2	1.23	0.29	0.22	-0.03	0.13
A_06_P4148	|| || || YJL127W-A || 1081290	1	-0.08	-0.07	0.11				0.21
A_06_P5354	ORC1 || DNA replication initiation* || ATPase activity* || YML065W || 1081291	1	-0.69	-0.93	-0.69	0.11	0.28	0.13	-0.17	-0.28	-0.66	-0.31	-0.23	-0.21
A_06_P3244	THG1 || tRNA modification || tRNA guanylyltransferase activity || YGR024C || 1081292	1	-0.54	-0.52	-0.56	0.56	0.15	0.64	-0.22	0.44	-0.5	-0.4	-0.29	-0.23
A_06_P3522	MRP4 || protein biosynthesis || structural constituent of ribosome* || YHL004W || 1081293	1	-0.17	1.23	0.78	-0.99	-0.46	-0.76	0.23	-1.17	-0.71	-0.65	-0.62	-0.52
A_06_P3626	CUP1-1 || response to copper ion || copper ion binding || YHR053C || 1081294	1	0.09	0.77	2.54	2.89	3.72	4.69	1.67	1.25	2.17	2.42	2.43	4.39
A_06_P6533	LCB4 || sphingolipid metabolism* || D-erythro-sphingosine kinase activity || YOR171C || 1081295	1	0.15	-0.24	0.04	-0.12	0.15	-0.25	-0.16	-0.31	-0.37	-0.42	-0.4	-0.2
A_06_P4697	TIF1 || translational initiation || translation initiation factor activity || YKR059W || 1081296	1	-0.06	-0.36	-3.75	-2.76	-2.27	-1.61	-0.14	0.29	-1.46	-2.57	-2	-0.98
A_06_P2644	GPA2 || sporulation (sensu Fungi)* || GTPase activity || YER020W || 1081297	1	1.85	1.77	3	2.31	1.14	1.93	0.22	-0.29	0.64	0.94	1.09	1.22
A_06_P5383	UTP14 || processing of 20S pre-rRNA || snoRNA binding || YML093W || 1081298	1	-3.46	-3.79	-4.23	-4.19		-2.83	-0.2	-1.13	-5.52		-3.37	-3
A_06_P1643	MAK31 || N-terminal protein amino acid acetylation || amino-acid N-acetyltransferase activity || YCR020C-A || 1081299	1	-1.3	-0.81	-1.82	-0.62	1.07	0.99	-0.68	-0.07	1.14	1.12	1	1.44
A_06_P4710	SIS2 || G1/S transition of mitotic cell cycle* || phosphopantothenoylcysteine decarboxylase activity* || YKR072C || 1081300	1	-0.78	-0.58	-0.46	-0.27	-0.14	0.26	-0.43	-0.97	-2.05	-2.13	-1.14	-0.78
A_06_P3958	BNR1 || actin filament organization* || cytoskeletal protein binding || YIL159W || 1081301	1	-0.95	-1.37	-0.86	-0.33	-0.45	-0.58	0.2	0.49	-0.64	-0.56	-0.22	0.38
A_06_P2504	ACN9 || gluconeogenesis* || molecular function unknown || YDR511W || 1081302	1	2.02	2.32	2.45	2.53	2.64	1.77	0.23	1.7	1.19	0.9	0.86	1.4
A_06_P5893	|| biological process unknown || molecular function unknown || YNL122C || 1081303	1	1.3	1.82	1.25	0.28	0.18	-0.04	0.33	0.51	0.3	0.27	-0.32	-0.36
A_06_P7255	|| biological process unknown || molecular function unknown || YDR381C-A || 1081304	1			0.91			-0.1				-0.81
A_06_P1303	|| biological process unknown || molecular function unknown || YBR056W || 1081306	1	2.94	3.08	3.3	3.74	3.73	2.83	0.05	2.48	2.87	2.54	2.42	2.36
A_06_P1590	ATG22 || protein-vacuolar targeting* || molecular function unknown || YCL038C || 1081307	1	1.14	1.43	2.19	2.14	2.25	1.97	-0.01	-0.21	1.79	1.88	1.66	1.57
A_06_P3642	RRP4 || 35S primary transcript processing* || 3'-5'-exoribonuclease activity || YHR069C || 1081308	1	-2.12	-1.9	-2.15	-1.17	-1.39	-1.23	-0.26	-0.7	-2.23	-1.94	-1.28	-0.95
A_06_P5882	CYB5 || sterol biosynthesis || electron transporter activity || YNL111C || 1081310	1	-1.79	-1	-2.17	-2.36		-1.89	0.51	-0.45	-0.66	-0.49	-0.5	-0.45
A_06_P2786	PET122 || protein biosynthesis || translation regulator activity || YER153C || 1081311	1	0.58	0.72	-3.14	-2.43	-3.1	-0.72	0.23	0.29	-0.77	-1.96	-0.64	-0.22
A_06_P6167	ESF2 || 35S primary transcript processing || transcription regulator activity || YNR054C || 1081312	1	-3.71	-2.65	-2.7	-2.58	-2.34	-1.46	-0.43	-1.4	-3.46	-3.86	-1.46	-1.46
A_06_P1314	NRG2 || invasive growth (sensu Saccharomyces) || transcriptional repressor activity || YBR066C || 1081313	1	0.76	1.35	-1.31	-1.13	-0.8	-1.39	0.25	1.71	2.31	2.63	2.22	2.2
A_06_P6260	HST1 || chromatin silencing || NAD-dependent histone deacetylase activity* || YOL068C || 1081314	1	-0.49	-0.1	0.19	-0.08	-0.41	0.09	-0.15	-0.67	-0.18	0	-0.21	-0.55
A_06_P5291	TRM12 || tRNA methylation || S-adenosylmethionine-dependent methyltransferase activity || YML005W || 1081315	1	-1.39	-1.47	-0.86	0.65	0.52	0.47	-0.62	-0.55	-0.95	-1.01	-0.6	-0.83
A_06_P3459	KEL2 || conjugation with cellular fusion* || molecular function unknown || YGR238C || 1081316	1	-0.02	0.35	0.99	0.48	-0.31	0.3	-0.11	0.06	-0.08	-0.2	-0.3	-0.78
A_06_P3229	SEC9 || vesicle fusion* || t-SNARE activity || YGR009C || 1081317	1	0.73	0.72	1.52	0.77	0.91	0.2	0.45	0.24	-0.04	0.11	0.15	0.33
A_06_P5381	RPM2 || protein biosynthesis* || ribonuclease P activity || YML091C || 1081318	1	2.86	2.16	3.13	2.24	2.76	2.13	0.46	0.96	0.69	0.73	0.75	0.23
A_06_P1042	ATS1 || budding cell bud growth* || molecular function unknown || YAL020C || 1081319	1	-0.22	-0.06	0.42	-0.53	-0.5	0.32	0.01	-1.29	-0.92	-0.78	-0.8	-0.45
A_06_P5322	RAD52 || telomerase-independent telomere maintenance* || recombinase activity* || YML032C || 1081320	1	0.03	0.13	0.27	-0.28	-1.24	-0.44	-0.2	-0.82	-0.13	-0.16	-0.39	-0.94
A_06_P4417	UFD4 || protein monoubiquitination* || ubiquitin-protein ligase activity || YKL010C || 1081321	1	0.45	0.81	1.01	1	1.08	1.24	0.1	-0.2	0.35	0.47	0.45	1.02
A_06_P4318	HOC1 || cell wall mannoprotein biosynthesis* || transferase activity, transferring glycosyl groups* || YJR075W || 1081323	1	-0.77	-1.08	-1.67	-1.6	-1.05	-1.46	-0.12	-0.34	-0.48	-0.45	-0.32	-0.24
A_06_P6591	WTM2 || regulation of meiosis || transcription corepressor activity || YOR229W || 1081324	1	-0.29	0.02	0.46	-0.8	-0.42	-0.2	0.24	-1.59	-0.9	-0.67	-0.64	-0.11
A_06_P2283	DPL1 || sphingolipid metabolism* || sphinganine-1-phosphate aldolase activity || YDR294C || 1081325	1	0.71	0.66	0.26	1.32	2.36	1.96	-0.29	1.18	0.82	0.79	0.8	0.85
A_06_P6943	|| protein biosynthesis || structural constituent of ribosome || YPL183W-A || 1081326	1	0.85	1.31	0.87	0.71	1.24	0.64	-0.02	0.63	0.64	0.46	0.26	0.74
A_06_P1682	YIH1 || regulation of amino acid metabolism || molecular function unknown || YCR059C || 1081327	1	-1.62	-1.7	-2.17	-2.69	-2.67	-1.63	-0.06	-1.89	-2.8	-2.53	-1.65	-1.22
A_06_P2981	TRP5 || tryptophan biosynthesis || tryptophan synthase activity || YGL026C || 1081328	1	-1.04	-1.07	-2.3	-2.03	-2.09	-1.52	-0.08	0.01	-1.27	-1.54	-1.34	-1.54
A_06_P6160	|| response to pheromone || protein kinase activity || YNR047W || 1081329	1	0.26	1.69	2.45	-0.33	1.39	1.64	1.13	-2.62	-0.02	0.41	0.18	0.61
A_06_P1253	UGA2 || response to oxidative stress* || succinate-semialdehyde dehydrogenase [NAD(P)+] activity || YBR006W || 1081330	1	2.51	2.63	2.66	3.44	3.31	3.19	0.34	1.51	3.46	3.29	3.25	3.5
A_06_P3119	YRB30 || biological process unknown || protein binding* || YGL164C || 1081331	1	0.9	0.73	1.03	0.83	0.91	0.42	0.31	0.65	1.06	1.28	0.58	0.68
A_06_P3623	SMF2 || manganese ion transport || di-, tri-valent inorganic cation transporter activity* || YHR050W || 1081332	1	0.74	0.15	1.01	0.09	-0.18	-0.48	0.14	-0.3	0.02	0.16	0.05	0.16
A_06_P4879	PET309 || protein biosynthesis* || translation regulator activity || YLR067C || 1081333	1	-1	-0.06	0.06	0.39	0.04	-0.31	-0.23	0.45	-0.65	-0.43	-0.52	-0.73
A_06_P5941	PSD1 || phosphatidylcholine biosynthesis || phosphatidylserine decarboxylase activity || YNL169C || 1081334	1	0.25	-0.37	-1.17	-1.96	-1.95	-2.64	0.5	-0.1	-0.12	-0.21	-0.52	-1.11
A_06_P4450	VPS24 || late endosome to vacuole transport* || molecular function unknown || YKL041W || 1081335	1	0.59	0.34	0.39	1.06	1.22	0.37	-0.07	1.28	1.16	0.93	0.86	0.76
A_06_P5727	HSH155 || spliceosome assembly || mRNA binding || YMR288W || 1081336	1	-0.61	-0.51	-0.33	0.25	0.06	-0.05	0.02	-0.37	-0.84	-0.66	-0.35	-0.22
A_06_P4519	|| biological process unknown || molecular function unknown || YKL107W || 1081337	1				6.33
A_06_P1437	|| biological process unknown || molecular function unknown || YBR184W || 1081338	1	-0.8	-0.7		-1.47		0.17	-0.23	1.27	0.7	1.07	0.59	-0.04
A_06_P2986	RPL24A || protein biosynthesis || structural constituent of ribosome* || YGL031C || 1081339	1	-1.4	-2.08	-5.27	-4.77	-4.97	-2.31	-0.4	0.24	-1.87	-3.75	-2.89	-2.4
A_06_P2320	PEX3 || peroxisome organization and biogenesis* || protein binding || YDR329C || 1081340	1	1.01	0.88	1.79	2.56	1.84	2.78	0.02	-0.17	0.65	0.62	0.66	0.15
A_06_P6422	|| biological process unknown || molecular function unknown || YOR060C || 1081341	1	0.1	-0.41	-0.01	-0.47	0.68	-0.28	-0.42	-0.82	0.52	0.4	0.21	0.24
A_06_P4702	|| biological process unknown || molecular function unknown || YKR064W || 1081342	1	-0.86	-0.32	0.29	0.31	0.31	0.2	0.37	-0.34	-0.38	-0.2	-0.02	-0.1
A_06_P5994	SSU72 || 35S primary transcript processing* || RNA binding* || YNL222W || 1081343	1	0.3	0.53	0.79	0.49	0.58	-0.16	0.21	0.73	1.16	1.26	0.62	0.04
A_06_P1179	MOH1 || biological process unknown || molecular function unknown || YBL049W || 1081344	1				4.83				0.96			4.01	4.97
A_06_P2536	|| biological process unknown || molecular function unknown || YDR542W || 1081345	1	0.22	0.52	0.89	1.31	1.79	1.83	-0.11	0.08	0.77	0.65	0.73	1.04
A_06_P5049	|| || || YLR235C || 1081346	1	-0.37	0.06	0.09
A_06_P5068	NDL1 || nuclear migration, microtubule-mediated || molecular function unknown || YLR254C || 1081347	1	1.28	1.38	1.57	2	2.14	1.97	0.04	1.11	2.06	2.01	1.61	2.11
A_06_P5571	RIM11 || protein amino acid phosphorylation* || protein serine/threonine kinase activity* || YMR139W || 1081348	1	2.55	2.2	3.31	3.92	3.07	2.59	0.21	1.29	1.97	1.66	1.37	1.04
A_06_P2711	|| biological process unknown || molecular function unknown || YER080W || 1081349	1	0.89	0.98	1.55	1.5	1.59	1.1	0.32	0.34	0.94	0.84	0.66	0.08
A_06_P6782	MET12 || methionine metabolism || methylenetetrahydrofolate reductase (NADPH) activity || YPL023C || 1081350	1	0.39	0.06	0.29	0.13	0.1	0.21	-0.09	-0.25	0.19	0.1	-0.36	-0.54
A_06_P7030	KAR9 || nuclear migration, microtubule-mediated || molecular function unknown || YPL269W || 1081351	1	-0.58	-0.54	-0.23	-0.94		-0.7	0.13	-0.94	-0.41	0.15	-0.38	-1.05
A_06_P3956	|| biological process unknown || molecular function unknown || YIL157C || 1081352	1	1.4	2.09	1.95	0.93	0.93	0.52	0.41	-0.13	0.81	0.8	0.8	-0.56
A_06_P5001	SKG3 || biological process unknown || molecular function unknown || YLR187W || 1081353	1	-0.95	-0.14	-0.32	-1.28	-1.01	-0.66	0.09	-1.13	-1.18	-0.91	-1.13	-1.65
A_06_P5286	YRF1-5 || telomerase-independent telomere maintenance || DNA helicase activity || YLR467W || 1081354	1	0.98	0.63	0.69	0.43	1.6	1.95	0.05	-0.28	0.35	0.3	0.68	2.1
A_06_P3179	SDT1 || pyrimidine base metabolism || nucleotidase activity || YGL224C || 1081355	1	-0.28	-0.3	-0.71	-0.08	-0.6	-1.04	0.2	1.57	1.93	1.79	1.19	1.07
A_06_P1391	|| biological process unknown || carboxypeptidase C activity || YBR139W || 1081357	1	2.29	2.01	3.05	2.48	1.85	1.94	0.97	1.08	2.56	2.52	2.02	1.62
A_06_P3283	SPT4 || regulation of transcription, DNA-dependent* || RNA polymerase II transcription elongation factor activity || YGR063C || 1081358	1	-0.83	-0.21	-1.15	-1.92	-1.09	-1.14	-0.28	-0.95	-0.52	-0.69	-0.7	-0.61
A_06_P6967	|| biological process unknown || molecular function unknown || YPL207W || 1081359	1	-1.64	-2.2	-2	-1.42	-2.15	-1.06	-0.27	-1.15	-2.5	-2.03	-1.35	-0.99
A_06_P4624	SAC1 || exocytosis* || inositol or phosphatidylinositol phosphatase activity || YKL212W || 1081361	1	-0.94	-0.82	-2.49	-3.54	-2.83	-3.41	-0.3	-0.78	-0.58	-0.76	-0.87	-0.78
A_06_P3485	MES1 || methionyl-tRNA aminoacylation || methionine-tRNA ligase activity || YGR264C || 1081362	1	-1.96	-2.36	-3.31	-3.56	-4.06	-3.61	-0.22	-0.86	-2.31	-2.53	-1.97	-2.47
A_06_P3045	LIF1 || double-strand break repair via nonhomologous end-joining || structural molecule activity || YGL090W || 1081363	1	-0.03	0.06	0.77	1.21	1.42	0.88	-0.02	-0.5	-0.51	-0.41	-0.16	-0.13
A_06_P4332	GRR1 || G1/S transition of mitotic cell cycle* || protein binding* || YJR090C || 1081364	1	0.09	0.12	0.55	0.86	0.46	0.57	0.15	0.46	0.68	0.65	0.34	0.29
A_06_P4962	|| biological process unknown || molecular function unknown || YLR149C || 1081365	1		6.44	7.58	6.64			2.04	3.85			5.37	5.52
A_06_P3706	|| biological process unknown || molecular function unknown || YHR131C || 1081367	1	0.65	0.61	0.94	0.87	0.75	0.85	-0.06	-0.49	0.15	0.17	0.16	0.18
A_06_P4034	|| || || YJL012C-A || 1081368	1	-0.19	-0.15	-0.76	-0.69	-1.14	-0.76	0.14	-0.18	0.8	0.87	0.33	-0.11
A_06_P1700	SRB8 || negative regulation of transcription from RNA polymerase II promoter || RNA polymerase II transcription mediator activity || YCR081W || 1081369	1	-0.1	0.1	0.28	0.11	-0.38	-0.18	0	-1.14	-0.99	-0.81	-0.98	-0.89
A_06_P3472	|| processing of 20S pre-rRNA || molecular function unknown || YGR251W || 1081371	1	-2.73	-2.91	-2.71	-1.91	-2.05	-1.3	-0.5	-1.82	-3.3	-2.94	-1.76	-0.91
A_06_P1672	IMG1 || protein biosynthesis || structural constituent of ribosome || YCR046C || 1081372	1	0.2	1.37	0.84	0.15	-0.42	-0.41	-0.15	-0.18	-0.38	-0.37	-0.24	-0.4
A_06_P3400	OKP1 || chromosome segregation || protein binding || YGR179C || 1081373	1	0.14	0.11	0.02	0.12	-0.61	-0.84	0.01	0.34	0.67	0.81	0.73	-0.01
A_06_P6532	|| || || YOR170W || 1081374	1											-0.74
A_06_P5750	GAS1 || cell wall organization and biogenesis* || 1,3-beta-glucanosyltransferase activity || YMR307W || 1081375	1	-0.21	-0.94	-2.28	-3.04	-3.48	-2.6	-0.04	-0.59	-0.44	-0.7	-0.66	-0.75
A_06_P6297	NDJ1 || synapsis* || telomeric DNA binding || YOL104C || 1081376	1		-0.42	-0.77	-1.19			0.04	-1.08	-0.34	-0.09	-0.98
A_06_P5739	LIP1 || ceramide biosynthesis || sphingosine N-acyltransferase activity || YMR298W || 1081378	1	0.38	0.27	-0.59	0.23	-0.01	-0.41	0.08	1.35	1.43	1.04	0.9	0
A_06_P2505	EMI1 || sporulation (sensu Fungi) || molecular function unknown || YDR512C || 1081379	1	0.94	1.92	1.94	0.95	2.51	1.69	0.16	-0.43	1.53	1.45	1.22	1.66
A_06_P6394	HMS1 || pseudohyphal growth || transcription factor activity || YOR032C || 1081380	1			-0.7						0.6		0.87
A_06_P6934	SPT14 || GPI anchor biosynthesis || UDP-glycosyltransferase activity || YPL175W || 1081381	1	-1.14	-1.07	-1.93	-1.62	-1.72	-1.76	-0.22	-0.16	-0.79	-0.66	-0.54	-0.26
A_06_P1511	POP4 || rRNA processing* || ribonuclease P activity* || YBR257W || 1081382	1	-0.52	-1.16	-0.57	0.54	0.68	0.77	-0.17	-0.55	-1.32	-1.2	-0.59	-0.39
A_06_P4494	HOT13 || mitochondrial intermembrane space protein import || molecular function unknown || YKL084W || 1081383	1	0	-0.83	-0.57	-0.24	-1.07	-0.42	0.86	1.26	1.07	0.96	0.27	0.69
A_06_P1221	AVT5 || transport || transporter activity || YBL089W || 1081384	1	0.29	0.14	0.47	-0.12	-0.88	-0.8	0.13	-0.59	0.46	0.47	0.02	-0.36
A_06_P2199	|| biological process unknown || molecular function unknown || YDR210W || 1081385	1	-0.27	-0.72	-1.48	-1.37	-1.9	-2.61	-0.01	1.38	0.33	0.34	-0.17	-0.81
A_06_P4579	TPK3 || protein amino acid phosphorylation* || protein serine/threonine kinase activity* || YKL166C || 1081386	1	-2.87	-1.98	-2.6	-2.38	-3.04	-2.19	-0.38	-1.14	-2.51	-2.19	-1.69	-1.85
A_06_P3647	OSH3 || steroid biosynthesis || oxysterol binding || YHR073W || 1081387	1	0.28	0.17	0.4	0.61	0.21	0.49	0.04	0.34	-0.11	0.08	0.14	0.47
A_06_P4619	|| biological process unknown || molecular function unknown || YKL207W || 1081388	1	-0.31	-0.17	-0.06	-0.56	-0.91	-0.93	0.22	-0.68	-0.3	-0.26	-0.65	-0.71
A_06_P2465	TRS31 || ER to Golgi transport || molecular function unknown || YDR472W || 1081390	1	-0.47	-0.43	-0.79	-1.51	-1.72	-1.29	0.16	-0.82	-0.49	-0.59	-0.85	-1.2
A_06_P6907	PPT2 || protein-cofactor linkage || phosphopantetheinyltransferase activity || YPL148C || 1081391	1	0.89	0.71	0.86	1.93	1.42	1.17	-0.01	0.83	1.27	1.18	0.83	0.48
A_06_P2016	|| biological process unknown || molecular function unknown || YDR031W || 1081392	1	2.29	2.45	3.35	2.8	3.04	1.56	0.68	1.78	1.88	1.65	1.39	1.82
A_06_P6099	EGT2 || cytokinesis || cellulase activity || YNL327W || 1081393	1	0.34	0.67	0.45	0.41	-0.1	-0.01	0.01	0.02	0.85	0.59	0.38	0.47
A_06_P3083	CWC23 || biological process unknown || molecular function unknown || YGL128C || 1081394	1	0.24	0.55	1.25	1.55	0.94	1.29	-0.19	0.09	0.35	0.64	0.5	-0.19
A_06_P4813	|| biological process unknown || molecular function unknown || YLR001C || 1081395	1	1.36	1.24	2.09	1.37	2.02	1.55	0.57	0.38	1.5	1.66	1.34	1.49
A_06_P2476	KRE2 || protein amino acid O-linked glycosylation* || alpha-1,2-mannosyltransferase activity || YDR483W || 1081396	1	0.07	0.1	-0.62	0.14	0.5	0.27	0.08	0.44	0.26	0.11	0.28	0.75
A_06_P6187	AIF1 || response to singlet oxygen* || oxidoreductase activity, acting on NADH or NADPH, disulfide as acceptor || YNR074C || 1081397	1	-0.3	-0.3	-0.75	-0.96	-1.53	-1.61	-0.21	-0.7	0.64	0.35	-0.64	-1.25
A_06_P6999	YAR1 || response to osmotic stress* || molecular function unknown || YPL239W || 1081400	1	-2.14	-2.33	-2.78	-2.12	-1.86	-1.53	-0.18	-0.78	-3.07	-2.68	-1.55	-0.73
A_06_P1721	|| biological process unknown || molecular function unknown || YCR100C || 1081401	1	0.93	-0.28	1.73	1.73			-0.25	-0.44	0.84	0.63	0.71	-0.34
A_06_P1855	|| metabolism || alpha-keto amide reductase activity* || YDL124W || 1081402	1	2.45	3.57	3.46	3.47	2.75	3.15	0.76	1.24	2.36	2.07	2.38	2.03
A_06_P7057	|| || || YPR012W || 1081403	1	0.59		0.95				0.34
A_06_P1529	RIF1 || chromatin silencing at telomere* || protein binding* || YBR275C || 1081404	1	-1.18	-1.45	-1.69	-2.68	-1.65	-1.3	0.19	-1.95	-0.86	-0.57	-0.49	0.13
A_06_P4019	|| biological process unknown || molecular function unknown || YIR042C || 1081405	1	-0.43	-0.19	-0.49	-0.65			0.88	0.73	3.71		2.23	0.34
A_06_P1300	|| biological process unknown || molecular function unknown || YBR053C || 1081406	1	2.57	3.26	3.66	3.95	3.06	3.36	0.28	1.8	3.28	3.05	2.73	2.47
A_06_P5219	DUS3 || tRNA modification || tRNA dihydrouridine synthase activity || YLR401C || 1081407	1	-2.78	-3.16	-3.95	-3.84		-3.63	-0.86	-2.03	-5.05	-5.41	-3.65	-3.64
A_06_P1399	|| biological process unknown || molecular function unknown || YBR147W || 1081408	1	1.34	0.35	1.96	2.75	2.07	1.85	0.12	0.8	2.53	2.08	1.62	1.52
A_06_P1450	|| biological process unknown || molecular function unknown || YBR197C || 1081409	1	-0.77	-0.66	-0.3	0.01	-0.73	-0.06	-0.27	-0.92	-1.08	-1.1	-0.82	-1.02
A_06_P1339	NHP6B || regulation of transcription from RNA polymerase II promoter* || chromatin binding || YBR089C-A || 1081410	1	1.72	1.5	1.91	2.77	2.67	2.95	0.01	1.52	1.67	1.66	1.31	1.34
A_06_P1788	RAD59 || telomerase-independent telomere maintenance* || protein binding* || YDL059C || 1081411	1	0.25	0.91	0.74	0.87	0.58	0.75	0.23	1.2	1.39	1.02	0	-0.56
A_06_P6640	RFM1 || chromatin silencing || unfolded protein binding || YOR279C || 1081412	1	0.05	0.01	0.09	0.1	-0.03	-0.29	-0.01	0.75	1.03	0.97	0.68	0.82
A_06_P1894	DHH1 || deadenylylation-dependent decapping* || protein binding* || YDL160C || 1081413	1	-0.07	0.97	1.35	-1.58	-1.22	-0.45	0.73	-1.57	-0.58	-0.37	-1.24	-1.96
A_06_P5910	RLR1 || mRNA-nucleus export* || DNA binding* || YNL139C || 1081414	1	-0.92	-0.32	-0.1	-0.95		-0.38	0.19	-1.19	-0.89	-0.8	-0.92	-1.67
A_06_P6454	ECM3 || cell wall organization and biogenesis || ATPase activity || YOR092W || 1081415	1	-0.39	-0.13	-1.15	-1.53	-1.79	-2.04	0	0.22	-0.26	-0.06	-0.16	-0.47
A_06_P1519	TSC10 || sphingolipid biosynthesis* || oxidoreductase activity, acting on NADH or NADPH || YBR265W || 1081416	1	-0.77	-0.72	-0.88	-1.05	-1.35	-0.73	0.09	-0.64	-0.4	-0.01	-0.46	-0.96
A_06_P6361	RRP6 || 35S primary transcript processing* || 3'-5'-exoribonuclease activity || YOR001W || 1081417	1	-2	-2.2	-2.52	-1.84	-1.53	-0.9	-0.46	-1.85	-3.53	-3.06	-2.13	-1.5
A_06_P5111	ATP14 || ATP synthesis coupled proton transport || hydrogen-transporting ATP synthase activity, rotational mechanism || YLR295C || 1081419	1	1.41	1.3	1.81	1.87	1.19	0.32	-0.5	0.8	0.72	0.47	0.62	-0.17
A_06_P5846	IMP4 || rRNA modification* || rRNA primary transcript binding || YNL075W || 1081420	1	-3.28	-3.7	-4.19	-3.8	-3.43	-2.55	-0.4	-1.78	-4.69	-4.51	-2.86	-2.34
A_06_P5984	VID27 || biological process unknown || molecular function unknown || YNL212W || 1081421	1	0.44	0.5	0.58	1.03	-0.41	0.62	0.03	0	0.45	0.46	0.38	0.01
A_06_P6521	SME1 || nuclear mRNA splicing, via spliceosome || RNA splicing factor activity, transesterification mechanism || YOR159C || 1081422	1	-0.99	-0.56	-1.11	-1.35	-0.96	-1.12	-0.3	-1.05	0.12	-0.02	-0.46	-0.88
A_06_P7045	CIT3 || tricarboxylic acid cycle* || citrate (Si)-synthase activity || YPR001W || 1081423	1		0.19	5.53	6.64		6.64	-0.08	-0.15	-0.07	-0.24		-0.15
A_06_P6931	COX10 || protein complex assembly* || protoheme IX farnesyltransferase activity || YPL172C || 1081425	1	0.3	0.62	0.34	0.12	-0.15	-0.76	0.04	-0.09	0.03	0.12	-0.21	-0.35
A_06_P6890	RPL5 || protein biosynthesis* || structural constituent of ribosome* || YPL131W || 1081426	1	-0.6	-1.18	-4.57	-4.53	-4.94	-2.44	0.06	-0.19	-2.85	-5	-3.53	-2.59
A_06_P4062	MHP1 || cell wall organization and biogenesis* || structural constituent of cytoskeleton || YJL042W || 1081427	1	1.27	1.58	2.38	2.02	1.63	1.66	0.28	0.22	1.07	1.31	1.57	1.23
A_06_P1874	BPL1 || protein amino acid biotinylation || biotin-[acetyl-CoA-carboxylase] ligase activity* || YDL141W || 1081428	1	-0.32	-0.51	-0.73	-0.77	-0.95	-1.02	-0.01	0.06	-0.62	-0.42	-0.23	-0.26
A_06_P2422	TIF35 || translational initiation || translation initiation factor activity || YDR429C || 1081429	1	-1.07	-0.91	-2	-2.03	-2.21	-1.11	-0.07	-0.82	-2.52	-2.46	-2.03	-1.99
A_06_P4521	HAP4 || transcription* || transcriptional activator activity || YKL109W || 1081430	1	3.34	3.75	3.67	2.05	2.62	1.07	-0.15	0.23	-0.57	-0.42	0.95	1.21
A_06_P2129	DOP1 || cellular morphogenesis || molecular function unknown || YDR141C || 1081431	1	0.29	0.46	0.23	0.71	0.98	0.34	0.05	0.31	0.58	0.59	0.43	0.02
A_06_P5069	|| || || YLR255C || 1081433	1	-0.24	-0.9	-0.53	-0.76		-0.51	-0.3	-0.65	-1.47	-1.38	-1.85	-1.57
A_06_P5914	|| || || YNL143C || 1081434	1	-3.12
A_06_P5311	UNG1 || DNA repair || uracil DNA N-glycosylase activity || YML021C || 1081435	1	-0.54	-0.68	-1.4	-1.69	-1.6	-1.81	0.48	0.45	-0.07	-0.12	-0.57	-0.61
A_06_P6322	VPS68 || protein-vacuolar targeting || molecular function unknown || YOL129W || 1081436	1	0.89	1.07	0.46	1.58	1.79	1.31	-0.05	1.37	1.88	1.65	1.43	1.37
A_06_P6490	ADE2 || 'de novo' IMP biosynthesis* || phosphoribosylaminoimidazole carboxylase activity || YOR128C || 1081437	1	-0.86	-1.79	-2.56	-1.83	-1.48	-1.64	-0.13	-0.13	-1.64	-1.66	-1.57	-1.57
A_06_P4407	MET14 || methionine metabolism* || adenylylsulfate kinase activity || YKL001C || 1081438	1	-0.8	0.65	-2.16	-1.88	-1.61	-1.68	0.2	1.11	-1.34	-1.95	-1.97	-2.01
A_06_P2367	BCS1 || aerobic respiration* || ATPase activity || YDR375C || 1081439	1	0.79	1.1	1.02	0.7	0.25	0.1	-0.06	0.32	0.07	-0.1	-0.26	-0.32
A_06_P6298	WSC3 || cell wall organization and biogenesis* || transmembrane receptor activity || YOL105C || 1081440	1	0.65	0.74	0.84	-0.12	0.47	-1.14	0.17	0.37	0.23	0.15	-0.39	-0.29
A_06_P4557	RPT1 || ubiquitin-dependent protein catabolism || ATPase activity* || YKL145W || 1081442	1	0.64	1.11	0.13	0.4	0.15	0.32	0.07	0.82	0.85	0.6	0.36	-0.09
A_06_P1950	GDH2 || nitrogen compound metabolism || glutamate dehydrogenase activity || YDL215C || 1081443	1	1.36	1.93	4.06	4.43	4.61	3.9	-0.01	0.36	1.32	1.88	1.85	2.4
A_06_P5113	|| biological process unknown || molecular function unknown || YLR297W || 1081444	1	2.52	2.51	3.4	3.11		3.92	0.27	0.07		2.06	1.95	2.4
A_06_P7142	SYT1 || vesicle-mediated transport* || ARF guanyl-nucleotide exchange factor activity || YPR095C || 1081445	1	0.71	0.54	0.55	0.51	1.15	0.84	0.37	0.58	0.21	0.53	0.57	1.29
A_06_P3058	RPL28 || protein biosynthesis || structural constituent of ribosome* || YGL103W || 1081446	1	-0.66	-1.17	-5.04	-4.42	-4.71	-2.38	-0.31	0.77	-2.82	-4.62	-3.13	-1.72
A_06_P5231	|| biological process unknown || molecular function unknown || YLR413W || 1081447	1	-2.11	-2.77	-2.78	-3.43	-2.82	-2.92	-0.45	-1.62	-3	-3.21	-2.89	-3.41
A_06_P5227	UTP21 || 35S primary transcript processing || snoRNA binding || YLR409C || 1081448	1	-3.55	-3.46	-3.99	-3.5	-3.84	-2.22	-0.56	-2.06	-5.43	-5.42	-3.69	-2.81
A_06_P5470	|| biological process unknown || molecular function unknown || YMR041C || 1081449	1	1.98	1.8	2.78	3.6	3.92	3.51	0.11	1.16	2.65	2.56	2.48	3.07
A_06_P7091	|| biological process unknown || molecular function unknown || YPR045C || 1081451	1	0.44	1.43	1.89	-0.67	1.22	0.48	1.02	-1.47	0.5	0.66	0.48	0.35
A_06_P5732	GOT1 || ER to Golgi transport* || molecular function unknown || YMR292W || 1081452	1	-1.02	-1.22	-1.95	-0.57	0.68	0.37	-1.4	0.62	1.88	1.07	1.89	1.07
A_06_P1653	FEN2 || endocytosis* || pantothenate transporter activity || YCR028C || 1081453	1	-1.02	-0.93	-0.15	-0.3	-0.61	0.01	-0.34	-2.25	-1.05	-1.03	-0.93	-1.12
A_06_P5801	HHF2 || chromatin assembly or disassembly || DNA binding || YNL030W || 1081454	1	0.59	-0.76	-0.85	-1.6	-1.49	-1.38	0.34	0.8	0.16	0.48	0.02	-0.37
A_06_P3749	ATG7 || protein-vacuolar targeting* || ubiquitin-like conjugating enzyme activity || YHR171W || 1081455	1	2.59	2.15	2.62	2.62	1.78	2.47	0.6	0.79	2.62	2.57	1.79	1.85
A_06_P3988	SQT1 || ribosomal large subunit assembly and maintenance || molecular function unknown || YIR012W || 1081456	1	-2.87	-2.51	-3.42	-3.44	-4.31	-3.53	-0.06	-1.37	-3.32	-3.17	-2.1	-2.41
A_06_P2460	|| || || YDR467C || 1081457	1		-0.49	-0.32	-0.18		-0.41	-0.29	-0.52		-0.15	-0.18	-0.1
A_06_P3823	|| biological process unknown || molecular function unknown || YIL023C || 1081458	1	0.67	0.51	1.15	1.33	0.99	1.05	-0.23	0.1	0.24	0.17	0.34	0.9
A_06_P3039	GUP1 || glycerol transport* || O-acyltransferase activity || YGL084C || 1081459	1	0.35	0.53	0.47	0.31	0.08	-0.32	-0.07	-0.3	0.01	-0.09	-0.23	-0.83
A_06_P6586	RPB8 || transcription from RNA polymerase II promoter* || DNA-directed RNA polymerase activity || YOR224C || 1081460	1	-1.69	-1.75	-2.92	-2.55	-2.51	-2.35	-0.2	0.4	-2.46	-2.48	-1.96	-1.86
A_06_P1832	CDC2 || nucleotide-excision repair* || delta DNA polymerase activity || YDL102W || 1081461	1	-0.81	-1.17	-1.33	-0.69	-0.47	-0.71	0.06	-0.19	-1.03	-0.96	-0.56	0
A_06_P1023	|| || || Q0297 || 1081462	1		0.2	1.47		2.22		1.56			-0.31		0.96
A_06_P1609	PRD1 || proteolysis and peptidolysis || metalloendopeptidase activity* || YCL057W || 1081463	1	0.27	1	0.45	0.25	0.37	-0.03	0.02	0.58	0.64	0.51	0.28	-0.21
A_06_P6694	MIP1 || DNA-dependent DNA replication* || gamma DNA-directed DNA polymerase activity || YOR330C || 1081464	1	0.66	0.29	0.76	0.92	0.51	0.74	0.25	0.08	0.24	0.72	0.64	0.59
A_06_P1374	MRPL36 || protein biosynthesis || structural constituent of ribosome || YBR122C || 1081466	1	0.48	0.75	0.61	0.62	0.92	-0.06	-0.64	0.57	0.14	0.09	0.1	0.32
A_06_P5437	|| metabolism || molecular function unknown || YMR010W || 1081467	1	-0.68	-0.8	-1.34	-1.65	-2.04	-1.92	-0.07	-0.52	-0.2	-0.42	-0.56	-1.03
A_06_P2556	PMP2 || cation transport || molecular function unknown || YEL017C-A || 1081468	1	-1.27	-0.95	-2.17	-2.46	-1.63	-2.04	-0.45	-1.22	0.48	0.86	0.52	0.08
A_06_P7019	THI21 || thiamin biosynthesis || phosphomethylpyrimidine kinase activity* || YPL258C || 1081469	1	-0.45	-0.56	0.34	0.09	0.09	0.26	0.01	-0.2	-0.49	-0.25	-0.49	0.36
A_06_P2348	|| biological process unknown || molecular function unknown || YDR357C || 1081470	1	0.79	1.13	0.83	1.78	2.75	2.29	0.01	1.53	1.01	1.24	0.9	1.26
A_06_P6120	|| biological process unknown || molecular function unknown || YNR009W || 1081471	1	-0.88	-1.27	-2.06	-2.4	-2.5	-2.53	-0.2	-0.68	-0.52	0.05	0.08	-1.26
A_06_P6409	STD1 || regulation of transcription from RNA polymerase II promoter* || protein kinase activator activity || YOR047C || 1081472	1	-1.59	-1.49	-2.13	-2.43	-2.42	-2.03	0.04	-0.52	-0.41	-0.14	-0.06	-0.45
A_06_P6885	NAN1 || processing of 20S pre-rRNA || snoRNA binding || YPL126W || 1081473	1	-2.98	-4.02	-5.04	-3.76	-3.65	-3.24	-0.38	-1.87	-4.87	-4.7	-3.16	-2.4
A_06_P6265	|| biological process unknown || molecular function unknown || YOL073C || 1081474	1	0.97		1.34				-0.24	0.96			0.44
A_06_P4347	SOD1 || zinc ion homeostasis* || copper, zinc superoxide dismutase activity || YJR104C || 1081476	1	1.98	2.98	1.65	2.53	2.32	2.88	0.79	1.36	2.04	1.25	1.72	3.03
A_06_P6124	PHO91 || phosphate transport || phosphate transporter activity || YNR013C || 1081477	1	-0.39	-0.28	-1.09	-0.81	-1.65	-0.78	-0.17	0.08	0.48	0.3	-0.25	-0.26
A_06_P5044	|| || || YLR230W || 1081478	1		-0.51	-0.66	-0.52			-0.56	0.28		0.25	0.06	-0.43
A_06_P4713	|| biological process unknown || molecular function unknown || YKR075C || 1081480	1	1.21	0.89	0.43	1.23	1.32	2.05	-0.85	0.05	0.1	0.71	0.16	-0.28
A_06_P6504	LSC1 || tricarboxylic acid cycle* || succinate-CoA ligase (ADP-forming) activity || YOR142W || 1081481	1	0.75	1.24	0.74	0.74	0.35	-0.03	0.1	0.05	1.39	1.28	0.61	-0.34
A_06_P3097	GPI10 || GPI anchor biosynthesis || mannosyltransferase activity || YGL142C || 1081482	1	0.28	0.23	0.56	0.01	-0.04	-0.03	0.05	-0.27	-0.2	-0.23	-0.46	-0.73
A_06_P2672	SPO73 || sporulation (sensu Fungi)* || molecular function unknown || YER046W || 1081483	1	1.29	1.16	2.23	1.54	1.77	1.6	0.37	1.01	2.33	2.29	1.52	1.75
A_06_P2388	SXM1 || mRNA-nucleus export* || protein carrier activity || YDR395W || 1081484	1	-1.58	-1.72	-3.17	-2.17	-1.61	-1.77	-0.16	0.11	-2.02	-1.94	-1.45	-0.84
A_06_P3278	|| biological process unknown || molecular function unknown || YGR058W || 1081486	1	-0.74	-0.4	0.09	0.14	-0.08	-0.84	-0.62	-0.38	-0.35	-0.64	-0.5	-1.02
A_06_P3077	NAB2 || mRNA polyadenylylation* || poly(A) binding || YGL122C || 1081487	1	0.33	0.26	0.59	0.21	-0.49	0.05	0.21	-0.54	-0.89	-0.86	-0.75	-1.07
A_06_P1667	|| || || YCR041W || 1081488	1		0.31	0.91	0.85	0.73	0.4	-0.12	0.93	0.81	0.78	0.25	0.39
A_06_P6106	SNO2 || thiamin biosynthesis* || molecular function unknown || YNL334C || 1081489	1	0.28	-0.62	-0.29	-0.27	-0.02	-0.06	-0.02	-0.22	0.05	-0.24	-0.25	0.05
A_06_P1079	PEX22 || protein-peroxisome targeting || molecular function unknown || YAL055W || 1081490	1	1.74	1.72	2.05	2.01	2.26	2.27	0.56	1.24	1.75	2	1.86	2.39
A_06_P5088	PIG1 || regulation of glycogen biosynthesis || protein phosphatase regulator activity || YLR273C || 1081491	1	1.79	2.29	1.95	1.44	2.01	1.74	0.52	0.44	1.09	1.06	0.47	1.09
A_06_P1752	DIA3 || pseudohyphal growth* || acid phosphatase activity || YDL024C || 1081492	1		3.48	5.04				0.57	0.55
A_06_P1469	YBP1 || response to oxidative stress || molecular function unknown || YBR216C || 1081493	1	0.87	0.71	1.14	1.04	0.51	0.39	0	0.04	1.04	0.98	0.53	0.03
A_06_P2082	|| || || YDR094W || 1081494	1	-0.01	-0.19	-0.81	-2.09	-0.78	-1.92	-0.17	-0.64	-0.47	-0.33	-0.18	0.29
A_06_P4206	GON7 || cell wall mannoprotein biosynthesis* || molecular function unknown || YJL184W || 1081495	1	-0.37	-0.53	-0.89	-0.37	-0.54	-0.62	-0.31	0	-0.72	-0.61	-0.22	0.1
A_06_P1566	SGF29 || histone acetylation || molecular function unknown || YCL010C || 1081496	1	0.11	-0.47	0.65	-1.23	-0.78	-0.6	0.95	-2.19	-1.04	-0.95	-0.85	-0.15
A_06_P6321	YGK3 || protein amino acid phosphorylation* || glycogen synthase kinase 3 activity || YOL128C || 1081497	1	-1.71	-1.76	-2.34	-2.38		-2.3	-0.19	-1.54	2.31	2.58	2.03	1.83
A_06_P2683	HIS1 || histidine biosynthesis || ATP phosphoribosyltransferase activity || YER055C || 1081498	1	-2.01	-2.66	-3.68	-3.5	-4.02	-3.65	-0.15	0.07	-1.83	-2.29	-2.05	-2.13
A_06_P5745	|| || || YMR304C-A || 1081499	1	-0.59	-2.54	-4.28	-3.97	-3.74	-3.56	0.23	-0.1	-1.48	-1.66	-0.92	0.25
A_06_P2420	RPN9 || ubiquitin-dependent protein catabolism || structural molecule activity || YDR427W || 1081500	1	0.35	0.75	0.6	0.29	0.29	0.26	0.15	0.38	1	0.82	0.34	-0.6
A_06_P5937	|| biological process unknown || molecular function unknown || YNL165W || 1081501	1	-0.56	-0.76	-0.2	0.63	0.43	0.78	-0.44	-0.56	-0.65	-0.64	-0.24	-0.29
A_06_P2581	UTR2 || cell wall organization and biogenesis || molecular function unknown || YEL040W || 1081502	1	-2.81	-2.32	-3.79	-3.92	-4.4	-3.67	0.05	0.36	-0.96	-1.52	-1.71	-2.58
A_06_P6558	LIP5 || lipoic acid biosynthesis || lipoic acid synthase activity || YOR196C || 1081503	1	-0.43	-0.73	-0.36	-0.81	-0.78	-0.98	0.03	-0.57	-0.83	-0.55	-0.47	-0.86
A_06_P7195	|| biological process unknown || molecular function unknown || YPR147C || 1081504	1	-0.01	-0.08	-0.19	0.14	-0.4	-0.76	-0.23	-0.44	-0.26	-0.33	-0.36	-0.4
A_06_P1136	SLA1 || cell wall organization and biogenesis* || protein binding, bridging* || YBL007C || 1081505	1	1.22	1.12	0.93	0.33	1.05	0.8	0.29	-0.02	0.54	0.52	0.45	0.48
A_06_P6956	OXR1 || response to oxidative stress || molecular function unknown || YPL196W || 1081507	1	2.31	2.29	2.83	3.24	3.13	2.56	-0.09	1.22	1.75	1.62	1.62	1.88
A_06_P5057	|| biological process unknown || signal sequence binding || YLR243W || 1081508	1	-2.17	-1.54	-2.31	-2.09	-1.46	-1.27	-0.26	-1.19	-2.85	-2.77	-1.69	-1.54
A_06_P7065	CDC54 || DNA replication initiation* || chromatin binding* || YPR019W || 1081509	1	-0.21	-0.2	-0.3	-0.12	-0.14	-0.2	0.03	-0.13	-0.19	-0.07	-0.49	-0.04
A_06_P1074	GEM1 || vesicle-mediated transport || GTPase activity || YAL048C || 1081510	1	-0.5	-0.06	0.34	-0.15	-0.05	0.33	-0.09	-1.8	-0.72	-0.61	-0.66	-0.58
A_06_P6963	TPK2 || protein amino acid phosphorylation* || protein serine/threonine kinase activity* || YPL203W || 1081511	1	3.59	3.34	4.21	4.39	3.2	3.75	0.47	1.74	3.36	3.11	2.75	1.96
A_06_P2319	SKP1 || protein complex assembly* || protein binding* || YDR328C || 1081512	1	0.27	0.68	0.99	0.82	0.68	1.15	0.29	-0.17	0.35	0.4	0.01	-0.26
A_06_P5728	|| biological process unknown || molecular function unknown || YMR289W || 1081513	1	0.03	0.37	-0.32	0.14	-0.74	-0.08	-0.47	-0.29	0.39	0.15	-0.05	-0.51
A_06_P3455	YHB1 || response to stress || nitric oxide reductase activity || YGR234W || 1081515	1	-0.98	-1.06	-1.95	-2.18	-2.26	-2.88	-0.39	-0.66	-0.83	-1.24	-1.29	-2.11
A_06_P6898	UME1 || regulation of meiosis || transcription corepressor activity || YPL139C || 1081516	1	0.61	0.5	0.35	0.31	1.3	0.72	0.21	0.41	0.4	0.43	0.22	0.26
A_06_P2869	|| biological process unknown || molecular function unknown || YFL042C || 1081517	1	2.27	2.41	2.87	3.08	2.26	2.77	0.2	0.7	1.7	1.79	1.66	1.22
A_06_P7237	SKI3 || mRNA catabolism* || translation repressor activity || YPR189W || 1081518	1	-0.33	0.18	0.18	-0.21	-0.18	-0.35	0.3	-0.24	0.14	0.36	-0.12	-0.4
A_06_P6996	|| biological process unknown || protein kinase activity || YPL236C || 1081519	1	1.1	0.87	1.4	1.72	1.36	1.5	-0.14	0.13	1.72	1.59	0.96	0.91
A_06_P6567	|| biological process unknown || molecular function unknown || YOR205C || 1081520	1	-1.33	-0.61	-0.86	-0.43	0.27	-0.33	-0.42	-0.02	-1.4	-1.23	-0.74	-0.19
A_06_P3771	EGD2 || nascent polypeptide association || unfolded protein binding || YHR193C || 1081521	1	0.24	0	-2.03	-1.38	-0.67	-0.6	-0.24	0.62	-0.92	-1.54	-1.16	-0.18
A_06_P5443	ERG5 || ergosterol biosynthesis || C-22 sterol desaturase activity || YMR015C || 1081522	1	-0.69	-0.07	-2.26	-2.88	-3.28	-2.78	0.24	-0.06	0.53	1.04	1.43	1.46
A_06_P5247	CRN1 || actin filament organization* || protein binding, bridging* || YLR429W || 1081523	1	0.34	0.03	-0.88	-1.51	-1.34	-1.74	-0.02	-0.17	-0.55	-0.62	-0.69	-0.56
A_06_P3501	SCW4 || conjugation with cellular fusion || glucosidase activity || YGR279C || 1081524	1	0.16	0.13	-0.17	-1.53	-1.77	-1.94	0.33	-0.46	0.52	0.47	0.12	-0.17
A_06_P2343	|| biological process unknown || molecular function unknown || YDR352W || 1081525	1	-0.5	-0.88	-0.79	-0.95	-1.35	-0.95	0.19	-0.84	0.76	0.79	0.12	-0.33
A_06_P6194	SIN3 || regulation of transcription from RNA polymerase II promoter* || histone deacetylase activity || YOL004W || 1081526	1	0.31	0.6	0.47	0.32	0.84	0.57	0.49	0.32	0.15	0.5	0.46	0.6
A_06_P7198	|| || || YPR150W || 1081527	1	0.61	0.48	1.23	1.99	1.68	1.81	-0.08	-0.21	1.08	1.06	0.92	0.93
A_06_P3178	COG1 || intra-Golgi transport* || molecular function unknown || YGL223C || 1081528	1	-0.01	0.05	0.38	0.35	-0.77	-0.37	0.33	0.19	0.3	0.38	-0.12	-1.01
A_06_P5409	ATR1 || multidrug transport || multidrug efflux pump activity || YML116W || 1081529	1	-2.3	-2.06	-1.76	-1.01	-1.4	-0.4	-0.54	-0.84	-1.54	-1.63	-1.55	-1.42
A_06_P3079	MON1 || protein-vacuolar targeting* || molecular function unknown || YGL124C || 1081530	1	0.71	0.51	1.24	0.69	0.81	0.25	-0.19	0.02	-0.16	-0.02	0.08	0.43
A_06_P5367	CPR3 || protein folding || peptidyl-prolyl cis-trans isomerase activity || YML078W || 1081531	1	0.11	0.96	0.19	-0.39	-0.63	-1.13	0.31	0.55	-0.03	-0.11	-0.18	-0.12
A_06_P3548	ECM29 || protein catabolism || protein binding || YHL030W || 1081532	1	0.78	1.54	0.97	0.65	0.9	0.81	0.4	0.8	1.8	1.68	0.85	0.8
A_06_P3367	|| biological process unknown || molecular function unknown || YGR146C || 1081533	1											0.16
A_06_P2914	FAB1 || response to stress* || 1-phosphatidylinositol-3-phosphate 5-kinase activity || YFR019W || 1081534	1	0.46	0.67	0.84	0.86	0.59	0.76	-0.09	-0.04	0.65	1.03	0.75	0.83
A_06_P2979	|| || || YGL024W || 1081535	1	-0.49		-0.39			-1.12		-0.19	-0.92		-0.83
A_06_P4250	SAG1 || agglutination during conjugation with cellular fusion || cell adhesion molecule binding || YJR004C || 1081536	1	-0.35	0.08	1.12	1.44	0.92	1.78	0.18	-0.46	0.91	0.96	0.67	0.48
A_06_P1419	TYR1 || tyrosine metabolism || prephenate dehydrogenase activity || YBR166C || 1081537	1	-0.87	-0.9	-1.69	-1.39	-1.38	-1.8	-0.32	0.15	-0.09	-0.22	-0.72	-0.82
A_06_P3102	RPL9A || protein biosynthesis || structural constituent of ribosome || YGL147C || 1081538	1	-0.62	-2.2	-4.05	-3.46	-3.81	-3.16	-0.68	1.05	-2.85	-4.77	-4.01	-3.51
A_06_P5349	OGG1 || DNA repair* || purine-specific oxidized base lesion DNA N-glycosylase activity || YML060W || 1081539	1	-2.34	-3.56	-4.37	-3.46		-3.37	-0.55	-0.09	-1.86	-2	-1.35	-1.18
A_06_P4701	LAS1 || establishment of cell polarity (sensu Fungi)* || molecular function unknown || YKR063C || 1081540	1	-2.1	-2	-2.5	-1.08	-0.96	-0.34	-0.19	-0.91	-2.37	-2.15	-1.2	-0.63
A_06_P3261	BUD9 || bud site selection || molecular function unknown || YGR041W || 1081542	1	-0.64	-0.01	-0.33	-0.64	-1.72	-1.81	0.14	-0.02	0.52	0.83	0.15	-0.06
A_06_P1492	|| biological process unknown || molecular function unknown || YBR238C || 1081543	1	-2.16	-2.54					-0.36	-2.13			-2.55
A_06_P3921	POG1 || G1/S-specific transcription in mitotic cell cycle* || specific RNA polymerase II transcription factor activity || YIL122W || 1081544	1	0.28	1.6	1.03	0.22	-0.2	1.13	0.14	-0.69	-0.48	0	0.07	0.54
A_06_P2506	GRX2 || response to oxidative stress* || thiol-disulfide exchange intermediate activity* || YDR513W || 1081545	1	2.8	2.98	3.29	3.9	3.97	3.25	0.41	2.43	3.01	2.75	2.47	2.8
A_06_P3941	CCT2 || protein folding* || unfolded protein binding || YIL142W || 1081546	1	-0.92	-0.54	-1.29	-0.33	-1.66	-0.72	0.23	-0.47	-1.01	-1.01	-0.55	-0.7
A_06_P3773	NVJ1 || microautophagy || protein binding || YHR195W || 1081547	1	1.7	1.85	2.84	1.44	1.62	1.93	0.16	-0.8	0.72	0.73	0.6	0.54
A_06_P6010	KEX2 || peptide pheromone maturation || serine-type endopeptidase activity || YNL238W || 1081548	1	-0.36	-0.25	-0.48	-0.7	-1.7	-0.87	-0.08	-0.71	-0.4	-0.02	-0.08	-0.53
A_06_P1550	PHO89 || phosphate transport || sodium:inorganic phosphate symporter activity || YBR296C || 1081549	1	0.03	-0.09	1.54	3.54	3.92	4.44	0.01	-0.5	-0.71	-1.1	-1.32
A_06_P5303	SEL1 || protein secretion* || molecular function unknown || YML013W || 1081550	1	0.72	0.71	1.2	0.09	0.14	0.2	0.16	-1.55	-0.11	-0.03	-0.33	-0.52
A_06_P2662	KRE29 || biological process unknown || molecular function unknown || YER038C || 1081551	1	-1.16	-0.68	-0.1	-0.11	-0.43	0.08	-0.07	-1.74	-1.37	-1.56	-0.69	-0.74
A_06_P6078	MRPS18 || protein biosynthesis || structural constituent of ribosome || YNL306W || 1081552	1	0.1	0.89	0.13	-0.18	0.04	-0.43	0.29	0.11	-0.2	-0.12	-0.09	0.13
A_06_P1482	ROT2 || cell wall biosynthesis (sensu Fungi) || alpha-glucosidase activity || YBR229C || 1081553	1	0.23	0.46	0.28	0.64	1.29	0.8	0.05	0.37	0.45	0.42	0.4	0.65
A_06_P2851	BST1 || ER to Golgi transport* || carboxylic ester hydrolase activity || YFL025C || 1081554	1	-0.66	-0.58	-0.53	-0.11	-0.14	-0.33	-0.35	-0.07	-0.11	-0.01	-0.19	-0.3
A_06_P4806	MMP1 || S-methylmethionine transport || S-methylmethionine transporter activity || YLL061W || 1081555	1	1.07	2.19	1.69	2.26	1.49	3.03	0.59	-0.68	-0.67	-0.76	-1.25	-1.41
A_06_P2681	|| biological process unknown || molecular function unknown || YER053C-A || 1081556	1	0.99	2.19	3.08				0.11				5.04
A_06_P5408	VAN1 || protein amino acid N-linked glycosylation || mannosyltransferase activity || YML115C || 1081557	1	0	-0.36	-0.51	-0.45	0.31	-0.53	-0.35	0.14	-0.35	-0.25	-0.21	0.18
A_06_P3803	EPS1 || protein retention in ER || protein disulfide isomerase activity || YIL005W || 1081558	1	0.25	0.33	0.23	0.11	0.21	-0.1	-0.08	0.11	0.52	0.36	0.3	0.03
A_06_P2236	VHS1 || protein amino acid phosphorylation* || protein kinase activity* || YDR247W || 1081559	1
A_06_P3401	RNR4 || DNA replication || ribonucleoside-diphosphate reductase activity || YGR180C || 1081560	1	0.51	0.66	-0.75	-1.14	-0.74	0.53	0.03	-0.52	0.73	1.49	1.8	1.75
A_06_P1103	KIN3 || chromosome segregation || protein kinase activity || YAR018C || 1081561	1	0.04	0.16	-0.47	-0.91		-2.35	0.3	0.21	0.92	0.77	-0.27	-1.44
A_06_P3889	ICE2 || ER organization and biogenesis || molecular function unknown || YIL090W || 1081562	1	-1.37	-0.93	-0.42	-0.03	-0.51	0.16	-0.59	-1.59	-1.3	-1.15	-0.78	-1.23
A_06_P2966	SCL1 || ubiquitin-dependent protein catabolism || endopeptidase activity || YGL011C || 1081563	1	0.92	0.96	0.5	0.87	0.71	0.68	0.13	1.21	1.36	1.16	0.81	0.54
A_06_P7014	VIK1 || mitotic sister chromatid cohesion* || microtubule motor activity || YPL253C || 1081564	1	-0.74	-0.36	-1.23	-1.21	-0.9	-1.53	-0.05	-0.01	-0.16	0.26	-0.06	-0.5
A_06_P4797	AQY2 || water transport || water channel activity || YLL052C || 1081565	1	0.03	0.18	1.17	1.85	1.45	1.45	-0.41	-1.05	0.3	0.71	0.95	1.51
A_06_P3438	CCH1 || calcium ion transport || calcium channel activity || YGR217W || 1081566	1	-1.35	-1.09	-1.84	-0.77	0.31	0.42	-0.18	-0.07	-0.69	-0.44	-0.03	0.41
A_06_P5308	|| biological process unknown || molecular function unknown || YML018C || 1081567	1	-3.76	-2.11	-2.92	-3.07	-3.16	-2.08	-0.28	-1.76	-2.21	-2.14	-1.74	-1.59
A_06_P1218	|| biological process unknown || molecular function unknown || YBL086C || 1081568	1	2.49	2.1	3.08	3.3	3.94	2.56	0.18	1.66	2.13	1.99	1.75	2.15
A_06_P4040	|| || || YJL018W || 1081569	1	-0.43	-1.46	0.06	-1.54	-1.43	-0.86	0.1	-1.97	-1.31	-1.1	-1	-1.01
A_06_P1084	BDH1 || butanediol fermentation || (R,R)-butanediol dehydrogenase activity || YAL060W || 1081570	1	2.32	3.27	2.26	1.99	1.51	1.23	0.07	0.98	1.66	1.3	0.95	0.63
A_06_P1728	AAD3 || aldehyde metabolism || aryl-alcohol dehydrogenase activity || YCR107W || 1081571	1				-0.93			-0.01		-1.43		-0.59
A_06_P2891	|| biological process unknown || molecular function unknown || YFL065C || 1081572	1	0.8	-0.25	-0.16	-0.57	0.16	-0.2	0.16	0.48	0.31	0.39	-0.08	0.89
A_06_P5734	JNM1 || nuclear migration || structural constituent of cytoskeleton || YMR294W || 1081573	1	-0.08	-0.14	0.27	0.38	0.69	0.28	-0.17	-0.09	-0.08	0.21	0.1	0.11
A_06_P2089	ARX1 || ribosomal large subunit biogenesis || molecular function unknown || YDR101C || 1081574	1	-4.86	-4.55	-5.3	-5.2	-5.87	-4.29	-0.43	-2.73	-5.58	-5.87	-3.77	-4.08
A_06_P5952	RHO5 || Rho protein signal transduction || GTPase activity || YNL180C || 1081575	1	0.39	0.49	1.23	1.21	1.28	0.78	0.1	1.02	-0.03	0.18	0.6	1.34
A_06_P5132	NKP2 || biological process unknown || molecular function unknown || YLR315W || 1081576	1	0.4	0.44	0.44	-0.51		-1.05	-0.26	-0.88	0.47	0.6	0.15	-1.26
A_06_P4779	RIX7 || ribosomal large subunit-nucleus export || ATPase activity* || YLL034C || 1081577	1	-4.38	-4.05	-5.18	-5.25		-3.37	-0.54	-2.46	-5.79	-5.37	-3.78	-3.15
A_06_P2659	EDC2 || deadenylylation-dependent decapping || RNA binding || YER035W || 1081578	1	2.45	2.92	4.49	1.96	3.14	3.19	0.98	-0.12	2.54	2.72	2.54	2.78
A_06_P6082	ZIM17 || protein folding* || protein binding || YNL310C || 1081579	1	0.11	-0.01	0.19	0.22	-0.35	-0.19	0.02	0.43	0.69	0.61	0.31	0.35
A_06_P7256	YOS1 || ER to Golgi transport || molecular function unknown || YER074W-A || 1081580	1	-0.02	-0.07	-0.94	0.88	0.97	0.84	-0.98	1.31	1.02	0.8	0.52	0.46
A_06_P1790	RPS29B || protein biosynthesis || structural constituent of ribosome || YDL061C || 1081582	1	-0.58	-1.77	-4.23	-2.93	-2.17	-1.54	-0.47	1.33	-2.18	-3.14	-1.93	-0.62
A_06_P4014	HYR1 || response to oxidative stress || thiol peroxidase activity* || YIR037W || 1081583	1	1.17	2	1.86	2.67	2.51	2.3	0.57	1.61	1.91	1.98	1.82	2.06
A_06_P1990	MAF1 || negative regulation of transcription from RNA polymerase III promoter || molecular function unknown || YDR005C || 1081584	1	1.06	0.8	1.32	0.57	0.53	0.48	0.5	-0.25	0.95	0.96	0.62	0.96
A_06_P4871	REX2 || RNA processing || 3'-5' exonuclease activity || YLR059C || 1081585	1	-0.57	0.31	-0.14	0.2	-0.27	-0.39	-0.22	0.3	0.11	-0.04	-0.01	-0.4
A_06_P4974	ASP3-4 || asparagine catabolism* || asparaginase activity || YLR160C || 1081586	1	0.84	-0.21	-1.8	-0.78	-1.04	0.23	0.78	0.79	2.85	2.04	1.88	2.88
A_06_P6009	YTP1 || biological process unknown || molecular function unknown || YNL237W || 1081587	1	2.52	3.26	4.68	3.99	4.02	3.74	0.39	0.82	2.46	2.65	2.68	2.93
A_06_P6052	ERG24 || ergosterol biosynthesis || delta14-sterol reductase activity || YNL280C || 1081588	1	-0.41	-0.32	-0.77	0.29	0.07	0.01	-0.01	0.3	-0.27	-0.11	0.32	0.45
A_06_P6936	CUP9 || transcription initiation from RNA polymerase II promoter* || specific RNA polymerase II transcription factor activity || YPL177C || 1081589	1	0.67	1.23	1.77	1.43	1.1	1.35	0.2	0.67	1.41	1.34	1.11	1.15
A_06_P7242	OPT2 || oligopeptide transport || oligopeptide transporter activity || YPR194C || 1081590	1			-0.54				0.53	0.41			2.95
A_06_P6713	CIN1 || post-chaperonin tubulin folding pathway* || beta-tubulin binding || YOR349W || 1081591	1	-0.85	0.12	0.64	1.25	0.83	0.87	-0.25	0.86	0.31	0.29	0.24	0.17
A_06_P4327	|| biological process unknown || molecular function unknown || YJR085C || 1081592	1	1.01	1.5	1.58	1.88	2.28	2.07	-0.01	0.27	1.18	1.05	1.26	1.6
A_06_P1972	|| biological process unknown || molecular function unknown || YDL237W || 1081593	1	0.14	0.18	-0.14	0.41	-0.16	-0.35	-0.25	0.33	0	-0.15	0.07	-0.51
A_06_P2303	|| biological process unknown || molecular function unknown || YDR314C || 1081594	1	1.8	1.09	1.71	1.1		0.35	0.12	0	0.93		0.38	0.4
A_06_P3123	HUR1 || DNA replication || molecular function unknown || YGL168W || 1081595	1	-0.15	-0.58	-0.95	-0.1	0.42	-0.19	-0.82	0.99	-0.34	-0.56	-0.39	0.15
A_06_P3909	|| biological process unknown || S-adenosylmethionine-dependent methyltransferase activity || YIL110W || 1081596	1	-2.09	-2.42	-3.21	-2.75	-2.42	-2.95	-0.52	-0.51	-2.02	-2.03	-1.72	-2
A_06_P7223	DPB2 || nucleotide-excision repair* || epsilon DNA polymerase activity || YPR175W || 1081597	1	-1.74	-2.42	-2.86	-2.19	-2.26	-2.04	-0.29	-0.06	-1.12	-1.38	-1.25	-1.38
A_06_P5707	PRP24 || spliceosome assembly* || RNA splicing factor activity, transesterification mechanism || YMR268C || 1081599	1	-2.07	-1.46	-0.82	0.28	-0.29	-0.12	-0.52	-0.55	-1.46	-1.54	-0.94	-1.5
A_06_P4616	EAP1 || negative regulation of translation || eukaryotic initiation factor 4E binding || YKL204W || 1081600	1	0.19	0.56	1.34	0.17	-0.29	0.11	0.27	-0.74	-0.34	-0.19	-0.38	-0.96
A_06_P1635	POL4 || double-strand break repair via nonhomologous end-joining* || beta DNA polymerase activity || YCR014C || 1081601	1	-0.73	-0.14	0.05	0.34	1.88	1.8	-0.14	-0.61	0.19	0.27	0.17	1.01
A_06_P3677	KIC1 || cell wall organization and biogenesis* || kinase activity || YHR102W || 1081602	1	0.12	-0.12	0.49	1.24	1.11	1.12	-0.01	0.36	0.67	0.93	0.53	0.86
A_06_P6466	PIN2 || biological process unknown || molecular function unknown || YOR104W || 1081604	1	0.81	0.24	-0.29	-0.69	0.94	-0.47	-0.18	0.35	0.88	1.09	0.89	2.21
A_06_P3375	|| biological process unknown || molecular function unknown || YGR154C || 1081605	1	2.2	3.42	3.54	4.43	4.35	5.04	0.95	1.71	4.2	4.22	2.92	3.1
A_06_P5018	QRI5 || biological process unknown || molecular function unknown || YLR204W || 1081606	1	1	1.51	0.77	0.85	1.75	1.12	-0.3	0.45	0.96	0.79	0.64	1.21
A_06_P3027	|| || || YGL072C || 1081608	1	0.12	-0.64	-0.45	-0.45	-0.03	-0.14	-0.73	0.91	-0.17	0.1	-0.22	-0.37
A_06_P1803	BRE1 || chromatin silencing at telomere* || ubiquitin-protein ligase activity || YDL074C || 1081609	1	-0.89	-0.94	-0.62	-0.96	-0.81	-0.64	0.3	-0.48	-0.78	-0.53	-0.63	-1.01
A_06_P3233	SNU71 || nuclear mRNA splicing, via spliceosome || RNA binding || YGR013W || 1081610	1	0.12	0.16	0.74	-0.85	-0.94	0.09	0.21	-1.44	-0.38	-0.12	-0.42	-0.06
A_06_P5830	ARP5 || protein-vacuolar targeting* || molecular function unknown || YNL059C || 1081611	1	0.13	-0.08	-0.17	-0.03	0.17	-0.25	-0.09	0.3	0.08	0.09	0.04	0.16
A_06_P3996	|| || || YIR020C || 1081612	1	1.22	1.35	1.74	1.63	0.77	1.88	-0.58	-0.17	1.07		0.6	0.5
A_06_P2567	SNU13 || nuclear mRNA splicing, via spliceosome* || RNA binding || YEL026W || 1081613	1	-2.25	-3.02	-3.46	-4.11	-3.15	-3.4	-0.08	0.2	-3.52	-4	-2.67	-2.52
A_06_P2037	TPI1 || glycolysis || triose-phosphate isomerase activity || YDR050C || 1081615	1	0.63	1	-3.32	-1.78	-2.25	-0.44	-0.09	0.24	0.12	-0.99	-0.08	0.08
A_06_P1501	ENP1 || rRNA processing* || snoRNA binding || YBR247C || 1081616	1	-4.78	-3.63	-4.73	-3.68	-3.81	-2.72	-0.74	-2.56	-5.71	-5.56	-3.24	-3.37
A_06_P2695	ICL1 || glyoxylate cycle || isocitrate lyase activity || YER065C || 1081617	1	2.54	1.18	8.17	6.51	6.64	5.11	0.25	-0.14	0.36	0.59	0.67	1.54
A_06_P1150	HAP3 || transcription* || transcriptional activator activity || YBL021C || 1081618	1	0.44	0.19	0.36	-0.21	-0.58	-1.13	-0.35	0.02	-0.54	-0.38	-0.34	-0.01
A_06_P4102	SCP160 || chromosome segregation* || RNA binding || YJL080C || 1081619	1	-0.7	-1.17	-3.13	-3.78	-3.68	-3.47	0.21	-0.12	-1.25	-1.38	-1.45	-1.56
A_06_P5802	HHT2 || chromatin assembly or disassembly || DNA binding || YNL031C || 1081620	1	0.65	-0.23	-0.19	-0.92	-0.43	-0.22	0.51	0.09	0.66	0.6	0.29	0.22
A_06_P2353	TFC6 || transcription initiation from RNA polymerase III promoter || RNA polymerase III transcription factor activity || YDR362C || 1081621	1	0.07	0.01	0.22	0.31	0.53	-0.33	-0.17	0.42	0.59	1.12	0.77	0.89
A_06_P4218	ELO1 || fatty acid elongation, unsaturated fatty acid || fatty acid elongase activity || YJL196C || 1081622	1	-0.46	-0.17	-1.05	-0.61	-0.86	-1.92	-0.1	0.11	0.46	0.72	0.27	0.6
A_06_P5867	RPS7B || protein biosynthesis || structural constituent of ribosome || YNL096C || 1081623	1	-1.2	-1.75	-3.92	-3.56	-2.89	-2.58	-0.31	0.12	-3.18	-3.87	-2.86	-1.9
A_06_P6917	|| biological process unknown || molecular function unknown || YPL158C || 1081624	1	0.04	0.18	0.41	0.61	0.45	-0.48	0.33	0.96	1.31	1.41	0.36	0.82
A_06_P4199	RPL17B || protein biosynthesis || structural constituent of ribosome || YJL177W || 1081625	1	-1.25	-2.27	-4.4	-4.62	-5.32	-3.23	-0.08	-0.83	-3.82	-4.99	-3.44	-2.71
A_06_P4854	|| biological process unknown || molecular function unknown || YLR042C || 1081627	1	-0.37	-1.21	-1.16	-1.47		-1.64	-0.07	0.3	-1.05	-1.06	-0.7	-1.14
A_06_P2834	AUA1 || amino acid transport || molecular function unknown || YFL010W-A || 1081628	1	0.08	-0.01	-0.68	-0.81	-1.08	-1.49	-0.26	1.29	0.55	0.81	0.38	-0.13
A_06_P3394	RBG2 || biological process unknown || GTP binding || YGR173W || 1081629	1	-2.19	-2.07	-3.85	-2.53	-2.35	-1.97	-0.13	-0.65	-4.03	-4.3	-2.49	-2.27
A_06_P4290	ANB1 || translational initiation || translation initiation factor activity || YJR047C || 1081630	1	-0.61	-0.35	-1.35	-0.42	-1.06	-0.54	-0.5	0.14	-0.1	-0.04	-0.14	0.14
A_06_P4628	URA1 || 'de novo' pyrimidine base biosynthesis || dihydroorotate dehydrogenase activity || YKL216W || 1081631	1	-1.89	-4.38	-5.28	-3.63	-3.51	-3.36	-0.49	-0.89	-4.79	-5.09	-3.14	-2.62
A_06_P4949	TIS11 || mRNA catabolism* || mRNA binding || YLR136C || 1081633	1	1.8	1.5	3.12	2.42	2.21	2.9	0.29	0.24	1.5	2.2	1.82	2.09
A_06_P6732	RAD17 || meiotic recombination* || double-stranded DNA binding || YOR368W || 1081634	1	-0.15	-0.73	-1.13	-0.56	-0.32	-0.36	-0.23	0.68	0.08	-0.09	-0.09	0.16
A_06_P4013	|| biological process unknown || molecular function unknown || YIR036C || 1081635	1	1.04	2.01	2.33	2.21	1.41	1.94	0.09	-0.22	1.21	1.33	1.07	1.06
A_06_P6126	SMM1 || tRNA modification* || tRNA dihydrouridine synthase activity || YNR015W || 1081636	1	-1.37	-2.15	-1.79	-1.7	-1.45	-1.18	-0.42	-1.02	-2.7	-2.6	-1.68	-1.29
A_06_P6046	|| metabolism || oxidoreductase activity, acting on the CH-OH group of donors, NAD or NADP as acceptor || YNL274C || 1081637	1	3.24	4.19	2.99	2.05	1.69	0.38	0.67	1.33	3.5	3.28	2.72	2.03
A_06_P6221	GAS5 || biological process unknown || 1,3-beta-glucanosyltransferase activity || YOL030W || 1081638	1	-0.21	-0.35	-1.44	-2.31	-1.99	-2.2	0.12	-0.6	-0.15	0.12	-0.46	-0.99
A_06_P4379	TIM8 || mitochondrial inner membrane protein import || protein transporter activity || YJR135W-A || 1081639	1	0.25	0.41	-0.23	0.41	1.01	-0.25	-0.16	1.21	0.22	0.27	-0.2	0.11
A_06_P5742	ATM1 || iron ion homeostasis || ATPase activity, coupled to transmembrane movement of substances || YMR301C || 1081640	1	-1.51	-1.74	-2.02	-1.88	-2.29	-1.45	-0.05	-1.25	-2.66	-2.33	-1.63	-1.45
A_06_P1502	HIS7 || histidine biosynthesis* || imidazoleglycerol phosphate synthase activity || YBR248C || 1081641	1	-2.07	-1.59	-2.97	-2.83	-2.56	-2.03	-0.17	-0.44	-2.04	-1.94	-1.32	-1.25
A_06_P5350	PIF1 || mitochondrial genome maintenance* || DNA helicase activity || YML061C || 1081642	1	-0.77	-0.7	-0.76	-0.61	-0.75	-0.13	-0.08	-0.58	-0.47	-0.19	-0.31	-0.61
A_06_P2702	|| biological process unknown || molecular function unknown || YER071C || 1081643	1	-0.13	0.26	-0.08	0.46	0.49	-0.19	0.17	0.78	1.12	0.81	0.49	0.25
A_06_P2815	FAU1 || folic acid and derivative biosynthesis || 5-formyltetrahydrofolate cyclo-ligase activity || YER183C || 1081644	1	-0.23	-0.31	-0.64	-0.24	-0.49	-0.81	0.17	0.39	0.1	-0.01	-0.26	-0.53
A_06_P4469	MPE1 || mRNA polyadenylylation* || RNA binding || YKL059C || 1081645	1	-0.22	0.03	0.23	-0.03	-0.91	-0.03	-0.21	-0.72	-0.81	-0.87	-0.73	-1.15
A_06_P5972	|| biological process unknown || molecular function unknown || YNL200C || 1081646	1	3.46	4.02	4.6	4.25	4.49	4.57	0.53	1.75	2.95	3.15	3.29	3.59
A_06_P3991	RPR2 || tRNA processing || ribonuclease P activity || YIR015W || 1081647	1	0.21	0.88	1.77	0.18	0.95	0.95	0.43	-1.77	0.08	0.47	0.28	0.1
A_06_P5144	|| biological process unknown || molecular function unknown || YLR327C || 1081648	1	9.1	7.74	8.88	6.36	6.64	6.64	1.25	4.31	5.26	5.43	5.18	6.21
A_06_P1131	HTB2 || chromatin assembly or disassembly || DNA binding || YBL002W || 1081649	1	-0.29	-1.81	-2.05	-2.11	-2.56	-2.33	0.11	1.01	0.23	0.28	0.03	-0.95
A_06_P2809	BMH1 || sporulation (sensu Fungi)* || protein binding* || YER177W || 1081650	1	0.87	1.41	-0.45	-0.4	-1.12	-0.5	0.01	0.41	0.55	-0.06	0.34	0.18
A_06_P6654	RPS10A || protein biosynthesis || structural constituent of ribosome || YOR293W || 1081651	1	-1.75	-2.13	-4.81	-4.71	-4.27	-2.54	0.01	0.17	-3.33	-4.21	-3.15	-2.04
A_06_P3983	|| biological process unknown || molecular function unknown || YIR007W || 1081652	1	1.67	1.9	1.95	1.21	0.35	0.31	0.63	0.67	2.2	2.12	1.25	0.75
A_06_P3537	APM2 || vesicle-mediated transport || clathrin binding || YHL019C || 1081653	1	1.06	1.15	1.16	0.84	0.89	1.12	0.49	0.18	1.33	1.34	1.1	1.02
A_06_P2044	YOS9 || ER to Golgi transport || protein transporter activity || YDR057W || 1081654	1	0.48	0.54	0.91	0.39	0.96	0.26	0.35	-0.47	0.1	0.16	0.24	0.35
A_06_P3519	RPL14B || protein biosynthesis || structural constituent of ribosome* || YHL001W || 1081655	1	-1.88	-2.07	-4.34	-4.21	-3.95	-2.7	0.29	0.12	-3.04	-3.73	-2.99	-1.57
A_06_P4620	CBT1 || mRNA processing* || molecular function unknown || YKL208W || 1081656	1	0.98	0.95	1.4	1.41	0.49	0.34	0.07	0.75	1.05	0.9	0.61	0.49
A_06_P5019	HMX1 || iron ion homeostasis* || heme binding* || YLR205C || 1081657	1	2.29	1.22	3.18	3.7	4.18	3.08	0.4	1.48	3.36	3.86	3.36	3.91
A_06_P3171	KIP3 || mitotic spindle organization and biogenesis in nucleus* || microtubule motor activity || YGL216W || 1081658	1	0.07	-0.11	0.14	-0.17	-0.85	-0.51	-0.02	-0.3	-0.31	0.18	0.03	-0.27
A_06_P4840	ADE16 || aerobic respiration* || IMP cyclohydrolase activity* || YLR028C || 1081659	1	0.91	1.23	1.07	0.39	0.05	0.23	0.37	-0.32	0.54	0.63	0.66	0.7
A_06_P5813	BOP3 || response to mercury ion || molecular function unknown || YNL042W || 1081660	1	0.06	-0.01	0.08	-0.59	-1.18	-1.26	0.06	-0.67	0.15	0.17	-0.1	-0.71
A_06_P1367	LYS2 || lysine biosynthesis via aminoadipic acid || L-aminoadipate-semialdehyde dehydrogenase activity || YBR115C || 1081661	1	-1.3	-2.63	-3.25	-2.88	-2.9	-2.53	-0.11	-0.44	-1.8	-1.78	-1.8	-1.49
A_06_P1807	MDH3 || fatty acid beta-oxidation* || L-malate dehydrogenase activity || YDL078C || 1081662	1	1.04	1.61	2.21	2.84	3.76	3.69	0.14	0.51	0.85	0.9	1.18	1.9
A_06_P4776	GPI13 || GPI anchor biosynthesis || transferase activity, transferring phosphorus-containing groups || YLL031C || 1081664	1	-0.45	-0.39	-0.77	-0.46	-0.96	-0.64	-0.3	-0.15	0.16	0.33	0.29	-0.72
A_06_P6727	PIP2 || peroxisome organization and biogenesis* || DNA binding* || YOR363C || 1081665	1	0.5	0.6	1.4	2.16	1.34	2.23	0.18	-0.61	0.46	0.76	0.69	0.7
A_06_P2612	|| biological process unknown || molecular function unknown || YEL070W || 1081666	1			2.25	2.24	2	2.55	-0.28		-0.1	-0.2	0.48
A_06_P6458	RPS7A || protein biosynthesis || structural constituent of ribosome || YOR096W || 1081668	1	-1.63	-2.45	-5.46	-5.01	-4.4	-2.87	-0.01	0.35	-3.01	-4.36	-3.86	-2.13
A_06_P2177	CCT6 || protein folding* || unfolded protein binding || YDR188W || 1081669	1	-0.47	-0.33	-0.49	-0.84	-1.32	-0.87	-0.1	-0.15	-1.12	-0.89	-0.85	-1.09
A_06_P6863	MSD1 || protein biosynthesis || aspartate-tRNA ligase activity || YPL104W || 1081670	1	1.1	1.61	1.35	1.69	1.36	0.97	-0.2	0.92	0.68	0.64	0.62	0.83
A_06_P2354	ESC2 || chromatin silencing at silent mating-type cassette || molecular function unknown || YDR363W || 1081671	1	0.49	0.14	0.84	0.85	0.16	-0.21	-0.14	-0.49	-0.37	-0.48	-0.52	-1.44
A_06_P2586	|| || || YEL045C || 1081672	1
A_06_P5651	EFR3 || cellular morphogenesis || molecular function unknown || YMR212C || 1081673	1	-0.79	-0.97	-1.47	-1.23	-0.99	-1.54	-0.28	-0.5	-0.99	-1.07	-1.04	-1.39
A_06_P3965	|| transport || transporter activity || YIL166C || 1081675	1	0.76	0.76	0.91	1.74	2.83	1.69	-0.04	0.31			1	1.18
A_06_P5079	RPS28B || protein biosynthesis || structural constituent of ribosome || YLR264W || 1081676	1	-2.21	-1.95	-3.93	-4.27	-3.63	-2.6	0.17	-0.82	-2.99	-3.07	-2.67	-1.91
A_06_P5395	CAC2 || DNA repair* || transcription regulator activity || YML102W || 1081677	1	-0.81	-1.16	-1.03	-1.75	-2.43	-1.53	-0.04	-1.07	-0.58	-0.48	-0.7	-0.92
A_06_P4566	SRP102 || protein-ER targeting* || GTPase activity* || YKL154W || 1081678	1	-1.2	-1.29	-2.34	-1.5	-1.5	-2.03	-0.09	0.85	0.2	-0.03	-0.39	-1.1
A_06_P5197	|| || || YLR379W || 1081679	1								-0.4
A_06_P6474	|| biological process unknown || molecular function unknown || YOR112W || 1081680	1	0.24	0.21	-0.14	-0.51	-0.64	-0.74	0.11	0.32	0.06	0.34	0.07	-0.24
A_06_P2024	KRS1 || lysyl-tRNA aminoacylation || lysine-tRNA ligase activity || YDR037W || 1081681	1	-0.91	-2.2	-4.04	-4.18	-3.48	-3.69	-0.34	-0.22	-2.78	-3.47	-2.41	-1.3
A_06_P2421	|| biological process unknown || molecular function unknown || YDR428C || 1081682	1	-0.59	-0.41	-0.59	-0.01	0.55	-0.3	-0.17	0.12	-0.7	-0.86	-0.65	-0.22
A_06_P2597	HAT2 || chromatin silencing at telomere* || H3/H4 histone acetyltransferase activity || YEL056W || 1081683	1	0.66	0.04	0.05	-0.36	-0.51	-1.24	0.14	0.48	-0.03	-0.22	-0.79	-1.07
A_06_P1373	GRS1 || glycyl-tRNA aminoacylation* || glycine-tRNA ligase activity || YBR121C || 1081685	1	-0.8	-1.07	-2.94	-3.46	-3.16	-2.99	0.18	-0.31	-1.88	-2.02	-1.82	-1.89
A_06_P6718	MSC6 || meiotic recombination || molecular function unknown || YOR354C || 1081686	1	0.32	1.05	0.71	0.4	0.46	0.06	0.3	0.11	-0.29	-0.15	-0.34	-0.21
A_06_P4305	NTA1 || protein catabolism* || protein N-terminal asparagine amidohydrolase activity || YJR062C || 1081687	1	1.2	0.69	0.68	0.73	0.49	-0.39	0.2	0.29	0.67	0.38	0.01	-0.41
A_06_P2361	XRS2 || double-strand break repair via nonhomologous end-joining* || protein binding* || YDR369C || 1081688	1	0.95	1.02	1.29	1.73	1.63	1.74	0.17	0.56	0.9	0.9	0.74	1.1
A_06_P3888	|| biological process unknown || molecular function unknown || YIL089W || 1081689	1	0.57	0.5	0.59				0.2		2.73			1.94
A_06_P3665	YNG2 || chromatin modification || enzyme activator activity || YHR090C || 1081690	1	0.06	0.02	0.84	0.95	1.27	0.66	-0.18	-0.23	-0.43	-0.19	-0.08	0.46
A_06_P1711	KIN82 || protein amino acid phosphorylation* || protein kinase activity || YCR091W || 1081691	1	4.13	3.31	4.52	3.95	4.16	4.03	0.18	1.24	2.62	1.92	1.62	1.05
A_06_P3133	MPT5 || cell wall organization and biogenesis* || mRNA binding || YGL178W || 1081693	1	-0.88	0	0.11	-1.15	-0.36	-1.16	0.08	-1.58	-0.41	-0.13	-0.02	0.59
A_06_P3573	NEM1 || sporulation (sensu Fungi)* || molecular function unknown || YHR004C || 1081694	1	1.54	1.39	1.65	1.43	1.28	1.27	0.58	0.81	1.49	1.53	1.44	1.46
A_06_P5698	|| biological process unknown || molecular function unknown || YMR259C || 1081695	1	-2.09	-1.94	-2.68	-1.46	-1.28	-1.18	-0.31	-0.51	-2.78	-2.5	-1.42	-1.1
A_06_P6714	MNE1 || biological process unknown || molecular function unknown || YOR350C || 1081696	1	-0.1	-0.22	0.39	1.56	1.72	1.77	-0.15	0.07	0.52	0.49	0.34	0.55
A_06_P2184	REF2 || mRNA processing* || RNA binding || YDR195W || 1081697	1	-0.18	0.23	0.83	0.72	0.64	0.56	0.1	-0.07	-0.33	-0.22	-0.18	-0.04
A_06_P6084	RFA2 || DNA recombination* || DNA binding || YNL312W || 1081698	1	-0.44	-0.98	-1.58	-1.69	-2.13	-1.16	-0.01	0.02	-0.09	-0.05	-0.14	-0.51
A_06_P5925	YCK2 || protein amino acid phosphorylation* || casein kinase I activity || YNL154C || 1081699	1	0.29	-0.09	-0.87	-1.14	-0.73	-1.18	0.1	0.14	-0.34	-0.5	-0.85	-0.96
A_06_P3282	COX18 || cytochrome c oxidase complex assembly || protein transporter activity || YGR062C || 1081700	1	0.55	0.96	0.65	0.21	-0.35	-0.23	-0.29	0.09	0.06	-0.1	-0.11	-0.21
A_06_P6785	SKS1 || protein amino acid phosphorylation* || protein serine/threonine kinase activity || YPL026C || 1081701	1	-0.6	-0.24	-0.55	-1.26	-1.73	-1.18	-0.04	0.04	-0.59	-0.4	0.06	0.08
A_06_P1673	BUD23 || bud site selection || S-adenosylmethionine-dependent methyltransferase activity || YCR047C || 1081702	1	-2.88	-3.1	-3.15	-3.18	-3.23	-1.85	-0.22	-2.58	-4.14	-3.6	-2.27	-1.57
A_06_P5814	|| || || YNL043C || 1081703	1	-0.12	-0.19	-0.15	0.12		0.03	0.41	0.62		0.72	0.55	0.35
A_06_P1567	GBP2 || telomere maintenance* || RNA binding* || YCL011C || 1081704	1	-0.33	-0.65	-0.17	-0.22	-0.59	-0.04	-0.14	-0.46	-1.26	-1.26	-0.88	-0.73
A_06_P1429	ECM31 || pantothenate biosynthesis || 3-methyl-2-oxobutanoate hydroxymethyltransferase activity || YBR176W || 1081705	1	-0.38	-0.39	-0.78	0.45	1.36	-0.37	-0.44	1.12	0.01	-0.23	0.14	0.61
A_06_P1290	QDR3 || multidrug transport || multidrug efflux pump activity || YBR043C || 1081706	1	-0.63	-0.45	0	0.72	1.86	1.91	0.32	-0.72	2.58	2.51	1.69	1.91
A_06_P3127	NUP49 || mRNA-nucleus export* || structural molecule activity || YGL172W || 1081707	1	-0.01	-0.04	0.06	-0.68	-0.86	-0.61	0.2	-0.87	-0.37	-0.29	-0.77	-1.26
A_06_P4948	SLX4 || DNA replication* || 5'-flap endonuclease activity || YLR135W || 1081708	1	-0.39	-0.32	0.07	0.04	0.28	0.43	-0.37	-0.6	-0.23	-0.23	-0.16	0.31
A_06_P4174	INO1 || myo-inositol metabolism || inositol-3-phosphate synthase activity || YJL153C || 1081709	1	1.5	1.66	0.18	0.41	0.37	0.36	1.9	0.81	3.46	3.83	3.68	2.93
A_06_P6553	RIS1 || chromatin assembly or disassembly* || DNA-dependent ATPase activity || YOR191W || 1081710	1	-0.13	0.05	0.17	0.88	0.96	1.01	-0.07	-0.19	0.19	0.37	0.28	0.35
A_06_P3016	DUO1 || mitotic spindle organization and biogenesis in nucleus* || structural constituent of cytoskeleton || YGL061C || 1081711	1	-1.3	-1.87	-2.16	-2.56		-2.48	0.08	-0.32	-0.56	-0.38	-0.7	-0.88
A_06_P4874	BUD28 || || || YLR062C || 1081712	1	-1.27	-2.16	-3.77	-4.07		-3.48	-0.72	0.8	-3.36	-3.98	-3.4	-2.09
A_06_P6615	SEC63 || posttranslational protein-membrane targeting* || protein transporter activity || YOR254C || 1081713	1	-1.33	-1.34	-2.46	-2.96	-3.15	-2.92	0.13	-0.69	-1.83	-1.78	-1.76	-2.06
A_06_P1629	SAT4 || G1/S transition of mitotic cell cycle* || protein kinase activity || YCR008W || 1081714	1	-0.18	-0.23	0.75	-0.14	-0.26	-0.57	-0.16	-0.91	-0.99	-0.57	-0.32	-0.33
A_06_P4070	MTR4 || 35S primary transcript processing* || ATP-dependent RNA helicase activity || YJL050W || 1081715	1	-3.04	-4.11	-5.3	-4.22	-3.95	-2.85	-0.24	-1.49	-5.38	-5.5	-3.15	-2.11
A_06_P6342	DCP1 || mRNA catabolism* || mRNA binding* || YOL149W || 1081716	1	-0.3	-0.68	-1.54	-1.44	-1.3	-1.42	-0.14	0.46	0.69	0.8	0.4	0.1
A_06_P3568	|| biological process unknown || helicase activity || YHL050C || 1081717	1	0.1	-0.11	0.17	-0.66	-0.63	0.43	-0.08	-1.26	-0.61	-0.28	-0.43	0.27
A_06_P5297	|| || || YML009C-A || 1081718	1	-0.43	-0.23	0.07	-1		-0.51	0.1	-0.08	-1.03	-0.63	-0.91	-0.6
A_06_P3775	RIX1 || 35S primary transcript processing* || molecular function unknown || YHR197W || 1081719	1	-3.4	-4.15	-3.35	-4.14		-3.41	-0.39	-2.91	-5.74	-5.55	-3.84	-2.91
A_06_P4443	TUL1 || protein ubiquitination* || ubiquitin-protein ligase activity || YKL034W || 1081720	1	1.66	1.63	2.22	2.73	2.49	2	0.37	1.29	1.4	1.46	1.45	1.56
A_06_P6482	GCY1 || response to salt stress* || aldo-keto reductase activity || YOR120W || 1081721	1	3.35	4.61	5.31	4.41	3.23	2.17	0.24	0.09	1.22	0.9	2.34	2.05
A_06_P3418	SNG1 || response to drug || molecular function unknown || YGR197C || 1081722	1	0.37	0.86	1.66	0.95	1.12	0.9	0.07	-1.04	0.08	0.28	-0.03	0.14
A_06_P6263	EMI5 || sporulation (sensu Fungi) || molecular function unknown || YOL071W || 1081723	1	2.19	2.76	2.59	3.26	3.22	2.75	0.01	1.78	2.11	1.71	1.8	2.16
A_06_P4979	PUS5 || rRNA modification* || pseudouridylate synthase activity || YLR165C || 1081724	1	1.07	1.14	1.92	2.48	2.66	2.65	-0.37	1.05	1.23	1.24	1.35	1.2
A_06_P2579	UTR4 || biological process unknown || molecular function unknown || YEL038W || 1081725	1	0.24	0.51	-0.05	-0.42	-1.81	-1.52	0.09	0.56	0.9	0.64	0.24	-0.3
A_06_P2913	|| biological process unknown || molecular function unknown || YFR018C || 1081727	1	-0.82	-0.12	0.36	-3.28	-2.88	-2.82	0.94	-3.28	-2.29	-1.69	-2.21	-3.02
A_06_P6547	GSP2 || nuclear organization and biogenesis || GTPase activity || YOR185C || 1081728	1	1.56	2.64	2.47	2.65	3.07	2.57	0.41	0.65	2.78	2.42	2.48	2.24
A_06_P3399	PBP1 || mRNA polyadenylylation || molecular function unknown || YGR178C || 1081729	1	0.33	0.63	0.58	0.45	0.88	0.65	0.26	0.08	0.04	0.33	0.17	0.06
A_06_P2640	AFG3 || protein complex assembly* || ATPase activity* || YER017C || 1081730	1	0.49	0.7	1.24	0.89	-0.27	0.56	0.08	-0.6	-0.14	-0.01	0.12	0
A_06_P3518	YRF1-3 || telomerase-independent telomere maintenance || DNA helicase activity || YGR296W || 1081731	1	0.87	0.53	0.59	0.45	1.63	1.96	0.07	-0.3	0.28	0.25	0.66	1.98
A_06_P3532	YLF2 || biological process unknown || GTP binding || YHL014C || 1081732	1	-0.43	0.21	0.07	0.25	-0.02	0.02	-0.16	0.01	-0.71	-0.6	-0.57	-1.08
A_06_P4078	|| biological process unknown || molecular function unknown || YJL057C || 1081733	1	2.62	2.82	3.25	2.8	2.24	2.77	0.34	1.22	2.27	2.17	1.91	1.89
A_06_P1823	PMT5 || protein amino acid O-linked glycosylation || dolichyl-phosphate-mannose-protein mannosyltransferase activity || YDL093W || 1081734	1	-0.75	-0.94	-1.29	-0.87	-1.67	-1.44	-0.36	0.33	0.04	0.11	0.13	-0.28
A_06_P3570	QCR10 || aerobic respiration* || ubiquinol-cytochrome-c reductase activity || YHR001W-A || 1081735	1	1.33	1.71	2.72	1.77	2.81	1.53	-0.11	0.34	1.78	1.42	1.02	0.84
A_06_P3065	CUE3 || biological process unknown || molecular function unknown || YGL110C || 1081736	1	0.05	-0.09	0	0.24	0.51	0.16	-0.27	0.19	0.15	0.11	0.21	0.39
A_06_P6878	DBP1 || translational initiation* || RNA helicase activity || YPL119C || 1081737	1	1.84	2.58	3.74	3.37	3.82	4.35	0.34	-0.62	1.52	1.85	1.82	2.19
A_06_P3313	|| biological process unknown || molecular function unknown || YGR093W || 1081738	1	-1.91	-1.65	-1.54	-0.81	-1.07	-0.93	-0.4	-0.62	-1.33	-1.08	-0.86	-0.85
A_06_P2984	CGR1 || rRNA processing* || molecular function unknown || YGL029W || 1081739	1	-4.54	-3.75	-4.45	-4.1	-2.55	-2.65	-0.22	-1.3	-4.68	-4.81	-2.77	-0.85
A_06_P4376	XPT1 || purine nucleotide biosynthesis || xanthine phosphoribosyltransferase activity || YJR133W || 1081740	1	-0.35	-0.07	-0.85	-0.69	-0.39	-0.49	0.43	0.22	0.88	0.88	0.07	-0.13
A_06_P1465	NGR1 || mitochondrion organization and biogenesis* || RNA binding* || YBR212W || 1081741	1	2.17	1.93	3.65	3.3	3.37	4.1	0.33	0.41	1.38	1.55	1.37	1.41
A_06_P6508	|| || || YOR146W || 1081742	1											-1.78
A_06_P6685	PMT3 || protein amino acid O-linked glycosylation || dolichyl-phosphate-mannose-protein mannosyltransferase activity || YOR321W || 1081743	1	-0.08	-0.35	-0.46	-1.32	-1.54	-1.17	0.04	-0.53	-0.02	-0.03	-0.29	-0.18
A_06_P4451	SPC42 || microtubule nucleation* || structural constituent of cytoskeleton || YKL042W || 1081744	1	-0.51	-0.48	-0.3	-1.21	-0.71	-0.52	0.04	-0.01	0.03	0.32	0.14	-0.25
A_06_P5240	|| biological process unknown || molecular function unknown || YLR422W || 1081745	1	0.28	0.67	0.73	1.45	1.24	1.35	-0.08	0.1	0.9	0.9	1.06	0.78
A_06_P4534	SRP21 || protein-ER targeting* || signal sequence binding || YKL122C || 1081746	1	-0.49	-0.56	-0.8	-0.49	0.05	-0.85	0.04	1.32	-0.44	-0.26	-0.32	0.13
A_06_P3353	PHB1 || protein folding* || molecular function unknown || YGR132C || 1081747	1	0.94	1.69	1.6	1	0.85	1.22	0.18	-0.28	0.64	0.59	0.62	0.31
A_06_P3017	PYC1 || gluconeogenesis* || pyruvate carboxylase activity || YGL062W || 1081748	1	0.69	1.45	0.97	0.96	0.6	0.37	0.29	0.84	-0.68	-1.15	-0.65	0.06
A_06_P6244	DDR2 || response to stress || molecular function unknown || YOL052C-A || 1081749	1	2.7	3.7	5.61	3.86	6.43	6.33	1.26	0.35	3.07	3.87	3.83	6.21
A_06_P2945	BNA6 || NAD biosynthesis || nicotinate-nucleotide diphosphorylase (carboxylating) activity || YFR047C || 1081750	1	0.31	0.8	0.95	0.56	1.31	0.29	0.28	-0.11	0.63	0.71	0.39	0.52
A_06_P5710	URA10 || 'de novo' pyrimidine base biosynthesis || orotate phosphoribosyltransferase activity || YMR271C || 1081751	1	2.14	2.52	3.7	5.35	4.63	4.19	-0.07	1.42	2.65	2.29	3.16	3.4
A_06_P2240	PAM1 || pseudohyphal growth || molecular function unknown || YDR251W || 1081752	1	1.46	1.26	1.15	0.53	0.01	-0.07	0.27	0.32	0.85	0.73	0.47	0.05
A_06_P4439	|| || || YKL031W || 1081753	1	0.68	0.72	0.56	0.62	1.02	0.04	0.25	0.36	1.02	1.3	0.87	1.11
A_06_P6211	TAT2 || aromatic amino acid transport || aromatic amino acid transporter activity || YOL020W || 1081754	1	-1.8	-2.22	-2.32	-1.92	-1.26	-1.21	-0.67	-1.52	-2.55	-2.57	-2.67	-3.14
A_06_P5054	VPS34 || protein amino acid phosphorylation* || protein kinase activity* || YLR240W || 1081755	1	0.58	0.75	1.04	1.25	0.96	0.89	-0.05	-0.13	0.57	0.31	0.24	-0.06
A_06_P1047	MAK16 || ribosomal large subunit biogenesis || molecular function unknown || YAL025C || 1081756	1	-4.76	-3.97	-4.17	-4.1	-4.59	-3.06	-0.48	-1.95	-4.77	-5.16	-2.57	-2.86
A_06_P4501	|| biological process unknown || molecular function unknown || YKL091C || 1081757	1	4.2	4.84	5.42	4.87	3.88	3.45	0.57	1.97	4.09	3.89	3.4	2.82
A_06_P2368	ARH1 || iron ion homeostasis* || NADPH-adrenodoxin reductase activity || YDR376W || 1081758	1	1.04	0.63	0.91	0.59	0.91	-0.67	-0.09	1.15	0.73	0.73	0.58	1.06
A_06_P4850	COX12 || cytochrome c oxidase complex assembly || cytochrome-c oxidase activity || YLR038C || 1081759	1	1.68	1.65	2.09	3.57	3.61	2.59	-0.32	2.09	1.98	1.51	1.75	1.87
A_06_P7011	ICY2 || biological process unknown || molecular function unknown || YPL250C || 1081760	1	-2.69	-0.17	1.08	1.59	3.12	2.68	-0.38	-1.17	-1.91	-2.09	-1.13	-0.36
A_06_P6371	TIR4 || biological process unknown || molecular function unknown || YOR009W || 1081761	1	0.28	0.24	1.09	0.93	-0.33	0.43	-0.28	-0.28	0.19	0.05	-0.56	-1.06
A_06_P6609	|| || || YOR248W || 1081762	1	-0.33	-0.74	-2.54	-1.98	-2.05	-1.88	-0.83	0.47	1.43	1.82	1.53	0.57
A_06_P4904	SUL2 || sulfate transport || sulfate transporter activity || YLR092W || 1081763	1	-1.45	0.7	-0.18	-0.82	-0.72	0.21	0.55	-0.35	-0.7	-0.87	-1.49	-1.75
A_06_P4757	PUF3 || mRNA catabolism, deadenylylation-dependent decay || mRNA binding || YLL013C || 1081764	1				-1.19	0.86	0.97			-1.53	-0.57	-1.19	-0.58
A_06_P1247	|| biological process unknown || helicase activity || YBL113C || 1081765	1	0.72	0.45	0.68	0.22	1	2.08	0.22	-0.75	0.09	0.08	0.39	1.97
A_06_P6258	RIB2 || riboflavin biosynthesis || pseudouridylate synthase activity* || YOL066C || 1081766	1	-0.62	-0.11	0.11	-0.08	-0.56	0.09	-0.24	-0.28	-0.69	-0.56	-0.51	-0.77
A_06_P1561	PGS1 || phospholipid biosynthesis || CDP-diacylglycerol-glycerol-3-phosphate 3-phosphatidyltransferase activity || YCL004W || 1081767	1	0.1	0.39	1.05	1.55	1.23	1.28	-0.1	0.26	0.5	0.45	0.68	0.52
A_06_P3204	PDE1 || cAMP-mediated signaling || cAMP-specific phosphodiesterase activity || YGL248W || 1081768	1	1.24	0.94	1.48	2.08	1.22	1.28	-0.22	0.8	0.88	0.95	1.11	1.17
A_06_P1207	SSA3 || response to stress* || ATPase activity || YBL075C || 1081769	1	0.04	1.25	2.73	2.77	3.76	5.31	0	-0.34	0.07	0.12	1.82	3.71
A_06_P1999	RAD61 || response to radiation || molecular function unknown || YDR014W || 1081770	1	0.23	-0.16	0.18	1	0.9	0.26	0.08	-0.36	-0.32	-0.46	0.06	-0.45
A_06_P4856	PDC1 || pyruvate metabolism* || pyruvate decarboxylase activity || YLR044C || 1081771	1	0.25	0.6	-3.69	-3.09	-2.46	-0.24	0.17	-0.05	0.19	-0.65	0.02	0.69
A_06_P2008	SES1 || seryl-tRNA aminoacylation || serine-tRNA ligase activity || YDR023W || 1081773	1	-0.78	-0.88	-2.46	-3.29	-3.61	-2.62	0.32	-0.95	-1.5	-1.57	-1.78	-2.28
A_06_P2947	YMR31 || protein biosynthesis || structural constituent of ribosome || YFR049W || 1081774	1	2.52	2.67	3.27	2.86	2.77	2.04	0.45	0.99	1.58	1.51	1.47	1.46
A_06_P1172	FUI1 || uridine transport || uridine transporter activity || YBL042C || 1081775	1	-2.72	-2.63	-3.29	-2.98	-2.28	-0.72	-0.62	-1.43	-3.77	-3.89	-2.35	-1.55
A_06_P4742	|| transport || ATPase activity, coupled to transmembrane movement of substances || YKR104W || 1081776	1	0.42	0.4	0.94	0.59	1.1	1.18	-0.07	-0.3	0.12	0.13	-0.26	-0.14
A_06_P3464	|| biological process unknown || molecular function unknown || YGR243W || 1081777	1	5.95	5.69	7.69	5.87	6.64	6.64	-0.12	2.16	1.94	2.03	2.57	2.82
A_06_P6566	DED1 || translational initiation || RNA helicase activity || YOR204W || 1081778	1	-2.51	-1.56	-1.99	-3.78	-4.05	-3.34	0.37	-2.64	-2.9	-2.48	-2.09	-3.08
A_06_P3503	YOR1 || transport* || xenobiotic-transporting ATPase activity || YGR281W || 1081779	1	1.6	1.5	1.7	1.53	1.46	1.52	0.51	0.89	1.33	1.31	1.71	2.02
A_06_P5810	BDP1 || transcription initiation from RNA polymerase III promoter || RNA polymerase III transcription factor activity || YNL039W || 1081780	1	-0.05	-0.04	0.33	0.38	0.69	0.04	-0.07	0.32	0.27	0.51	0.32	0.41
A_06_P1546	|| || || YBR292C || 1081781	1	-1.87	-1.07	-1.11	-0.61	0.03	-0.89	-0.82	-0.22	-1.2	-0.85	-0.79	-0.18
A_06_P3209	HXK2 || replicative cell aging* || hexokinase activity || YGL253W || 1081782	1	0.55	-0.6	-3.88	-4.23	-5.04	-3.81	-0.04	-0.18	-0.3	-0.41	-0.17	-0.91
A_06_P2663	HVG1 || biological process unknown || molecular function unknown || YER039C || 1081783	1	1.33	1.12	1.85	2	1.53	2.3	0.24	0.18	1.7	1.68	1.25	1.79
A_06_P5073	HSP60 || protein folding* || single-stranded DNA binding || YLR259C || 1081784	1	0.42	2.27	1.21	1.11	0.42	0.71	0.04	1.09	0.07	0.04	0.46	0.71
A_06_P1359	IML3 || chromosome segregation || molecular function unknown || YBR107C || 1081785	1	0.69	-0.05	0.39	0.54	-0.1	0.34	0.07	0.05	0.56	0.43	0.09	-0.07
A_06_P2618	|| biological process unknown || molecular function unknown || YEL076C || 1081786	1	-0.3	-0.25	-0.21	-0.56			0.35	0.81				1.1
A_06_P3167	VAM7 || vesicle fusion* || v-SNARE activity || YGL212W || 1081787	1	0.37	0.28	0.77	-0.41	1.02	0.43	0.24	-0.47	0.74	1.22	0.81	1.45
A_06_P3806	URM1 || protein modification || protein binding* || YIL008W || 1081788	1	-1.49	-2.07	-2.43	-1.98	-1.23	-0.98	0.4	-0.61	-2.2	-1.91	-0.97	-0.06
A_06_P6376	RTS1 || protein biosynthesis* || protein phosphatase type 2A activity || YOR014W || 1081789	1	0.73	0.71	0.63	0.42	0.02	0.26	-0.02	-0.35	0.75	0.68	0.37	-0.21
A_06_P4229	|| biological process unknown || molecular function unknown || YJL207C || 1081790	1	-0.5	-0.46	-0.66	-0.62	-0.23	-0.4	-0.04	0.36	-0.04	0.11	-0.01	0.03
A_06_P6358	BDS1 || dodecyl sulfate metabolism || arylsulfatase activity* || YOL164W || 1081792	1	0.44	1.19	0.76	1.86	1.36	1.35	0.47	0.02	1.08	0.74	0.34	0.28
A_06_P1827	RPN6 || ubiquitin-dependent protein catabolism || structural molecule activity || YDL097C || 1081793	1	1.19	1.27	1.22	1.52	0.76	0.83	0.02	1.21	1.12	0.74	0.72	-0.12
A_06_P1191	|| biological process unknown || molecular function unknown || YBL060W || 1081794	1	-0.42	-0.27	0.35	0.87	1.17	0.39	-0.32	0.21	-0.09	0.07	0.14	0.69
A_06_P6597	|| || || YOR235W || 1081795	1		0.52	-0.56
A_06_P4883	RGR1 || transcription from RNA polymerase II promoter || RNA polymerase II transcription mediator activity || YLR071C || 1081796	1	-0.59	-0.15	-0.08	0.09	-0.68	0.09	-0.14	-0.2	-0.67	-0.61	-0.67	-0.95
A_06_P1806	VAM6 || vacuole organization and biogenesis* || Rab guanyl-nucleotide exchange factor activity || YDL077C || 1081797	1	0.28	0.57	0.64	0.49	0.26	0.67	-0.17	0.11	0.46	0.47	0.31	0.33
A_06_P4256	SPC1 || signal peptide processing || molecular function unknown || YJR010C-A || 1081798	1								-0.79		0.22		0.65
A_06_P2481	PAC11 || nuclear migration, microtubule-mediated* || microtubule motor activity* || YDR488C || 1081799	1	0.13	-0.51	-0.25	-1.29	-0.51	0.31	-0.11	-1.23	-0.27	0.21	0.18	1.13
A_06_P5376	ALO1 || response to oxidative stress || D-arabinono-1,4-lactone oxidase activity || YML086C || 1081800	1	0.47	0.6	0.41	0.25	0.18	-0.25	0.28	0.69	0.16	-0.04	-0.18	-0.12
A_06_P6190	|| || || YNR077C || 1081801	1								-0.68
A_06_P7004	HUT1 || UDP-galactose transport || UDP-galactose transporter activity || YPL244C || 1081802	1	-1.18	-1.23	-1.86	-1.94	-2.02	-1.94	-0.06	-0.33	-1.3	-1.28	-1.35	-1.38
A_06_P3109	LYS5 || lysine biosynthesis via aminoadipic acid* || phosphopantetheinyltransferase activity || YGL154C || 1081803	1	0.56	0.5	1.64	1.21	2.05	1.69	0.24	-0.62	0.61	0.6	0.47	0.57
A_06_P3236	|| biological process unknown || molecular function unknown || YGR016W || 1081804	1	0.62	0.09	0.65	1.33	1.14	1.33	-0.51	0.36	1.29	0.9	0.67	-0.08
A_06_P1226	ROX3 || transcription from RNA polymerase II promoter || RNA polymerase II transcription mediator activity || YBL093C || 1081805	1	-0.72	-0.75	-0.49	0.1	-0.27	-0.21	-0.07	-0.14	0.14	0.04	0.24	0.12
A_06_P1327	RPG1 || translational initiation || translation initiation factor activity || YBR079C || 1081806	1	-1.85	-1.36	-2.41	-2.81	-3.11	-2.36	-0.07	-0.98	-2.38	-2.32	-1.76	-2
A_06_P2790	COG3 || ER to Golgi transport* || protein transporter activity || YER157W || 1081807	1	-0.47	-0.57	-0.87	-0.9	-0.51	-1.54	0.22	0.33	0.7	0.89	0.44	0.4
A_06_P1922	|| || || YDL187C || 1081808	1	0.36	-0.08	0	-1.05	-0.85	-0.96	-0.22	-1.1	-0.66	-0.55	-1.2	-1.5
A_06_P1583	RRP7 || 35S primary transcript processing* || molecular function unknown || YCL031C || 1081809	1	-0.99	-1.05	-0.83	-0.26	-0.33	-0.41	-0.29	-0.14	-1.29	-1.42	-1.2	-1.31
A_06_P5024	CLB4 || G2/M transition of mitotic cell cycle* || cyclin-dependent protein kinase regulator activity || YLR210W || 1081810	1	-0.65	-0.92	-1.26	-1.13		-2.18	0.09	0.19	0.45	0.67	0.25	-0.91
A_06_P3492	|| biological process unknown || molecular function unknown || YGR271C-A || 1081811	1	-4.51	-3.77	-4.87	-3.51	-2.94	-2.42	-0.44	-1.04	-4.5	-3.86	-2.42	-2.2
A_06_P1870	ARF2 || ER to Golgi transport* || GTPase activity || YDL137W || 1081812	1	1.09	1.75	0.66	1.2	1.53	1.47	0.49	1.2	1.28	1.2	1.06	1.76
A_06_P5214	VPS33 || late endosome to vacuole transport* || ATP binding || YLR396C || 1081813	1	0.02	0.06	0.23	0.55	0.08	0.29	0.08	0.23	0.19	0.23	0.03	0.17
A_06_P5671	FUS2 || regulation of termination of mating projection growth* || molecular function unknown || YMR232W || 1081814	1	-0.27	0.56	0.91	0.49	0.48	0.1	0.05	0.43	0.51	0.73	0.6	0.1
A_06_P6981	|| biological process unknown || molecular function unknown || YPL221W || 1081816	1	-0.17	-0.15	-0.82	-0.64	0.07	-1.11	-0.3	0.62	-0.38	-0.44	0.38	0.82
A_06_P4384	HIR3 || G1/S-specific transcription in mitotic cell cycle || transcription corepressor activity || YJR140C || 1081817	1	-0.48	-0.47	-0.74	0.18	0.07	0.08	-0.06	0.23	-0.09	0.17	0.27	0.49
A_06_P3907	|| proteolysis and peptidolysis || metalloendopeptidase activity || YIL108W || 1081818	1	1	1.12	1.56	0.44	1.41	0.64	0.14	-0.51	0.53	0.72	0.75	1.15
A_06_P4765	|| || || YLL020C || 1081819	1	2.06	1.67	3.05	2.51	3.23	2.79	0.59	-0.33	1.54	1.72	1.56	1.85
A_06_P2836	|| biological process unknown || molecular function unknown || YFL012W || 1081820	1								-0.18
A_06_P7017	CLN2 || regulation of cyclin dependent protein kinase activity* || cyclin-dependent protein kinase regulator activity || YPL256C || 1081821	1	-2	-1.69	-2.91	-2.68		-2.55	-0.22	-0.32	-0.65	-0.72	-0.17	-1.05
A_06_P4285	NUP85 || mRNA-nucleus export* || structural molecule activity || YJR042W || 1081822	1	-0.63	-0.68	-1.2	-0.65	-0.34	-0.79	-0.12	0.2	-0.88	-0.7	-0.6	-0.48
A_06_P6779	ULP1 || G2/M transition of mitotic cell cycle* || cysteine-type peptidase activity* || YPL020C || 1081823	1	0.12	0	0.1	0.28	0.48	0.44	-0.06	0.3	0.22	0.3	-0.01	0.21
A_06_P1967	OST4 || protein amino acid N-linked glycosylation || protein binding, bridging* || YDL232W || 1081824	1	0.04	-0.19	-0.35	-0.92	-0.35	-1.37	0.57	0.35	0.03	-0.01	-0.16	-0.34
A_06_P4916	CDC45 || DNA replication initiation* || DNA binding || YLR103C || 1081825	1	-1.54	-1.79	-3.17	-2.91	-2.71	-2.16	-0.14	0.18	-0.84	-0.9	-0.68	-0.43
A_06_P2651	GAL83 || protein amino acid phosphorylation* || AMP-activated protein kinase activity || YER027C || 1081826	1	0.47	0.63	0.14	-0.03	-1.39	-0.57	-0.21	0.24	0.52	0.31	-0.08	-1.14
A_06_P5033	MSC3 || meiotic recombination || molecular function unknown || YLR219W || 1081827	1	1.52	1.32	2.26	1.8	1.3	1.95	0.21	-0.73	0.34	0.65	0.76	0.77
A_06_P6428	|| biological process unknown || molecular function unknown || YOR066W || 1081828	1	-1.21	0.03	-0.05	-0.92	-0.86	-0.33	0.26	-0.65	0.56	0.69	-0.07	-0.06
A_06_P4539	PGM1 || glucose 1-phosphate utilization* || phosphoglucomutase activity || YKL127W || 1081829	1	-0.73	-1.58	-2.63	-2.24	-2.91	-3.39	-0.35	-0.72	-0.62	-0.72	-0.68	-1.49
A_06_P4115	TOK1 || potassium ion homeostasis || potassium channel activity || YJL093C || 1081830	1	0.99	0.41	1.02	0.5	0.6	0.46	0.02	-0.38	0.26	0.35	0.32	0.64
A_06_P3421	ELP2 || regulation of transcription from RNA polymerase II promoter || RNA polymerase II transcription elongation factor activity || YGR200C || 1081831	1	-1.94	-2.68	-3.92	-3.29	-3.02	-2.42	-0.17	-1.48	-4.3	-4.6	-3.15	-2.55
A_06_P4740	FLO10 || flocculation (sensu Saccharomyces) || mannose binding || YKR102W || 1081832	1	0.61		2.29	2.1			0.12	0.71			0.75	0.62
A_06_P3038	SCY1 || biological process unknown || molecular function unknown || YGL083W || 1081833	1	0.15	0.37	0.17	0.15	0.47	0	0.18	0.39	0.46	0.52	0.05	-0.18
A_06_P4461	ASK1 || mitotic spindle organization and biogenesis in nucleus* || structural constituent of cytoskeleton || YKL052C || 1081834	1	-0.76	-0.57	-0.46	-0.67	-1.15	-0.6	-0.08	-0.77	-0.1	0.29	-0.04	-0.54
A_06_P5733	|| aerobic respiration || amidase activity || YMR293C || 1081835	1	0.81	1.05	0.88	0.89	1.49	0.68	0.17	0.26	0.79	0.83	0.75	0.93
A_06_P2200	GCD6 || translational initiation || translation initiation factor activity* || YDR211W || 1081836	1	-1.46	-1.67	-2.86	-2.1	-1.95	-1.58	-0.32	-0.14	-1.94	-1.8	-1.42	-1.05
A_06_P4892	EMP46 || ER to Golgi transport || molecular function unknown || YLR080W || 1081837	1	3.08	3.48	4.7	4.85	5.73	4.98	0.51	1.9	3.12	3.08	3.24	3.79
A_06_P3245	|| || || YGR025W || 1081838	1	0.2		-0.43				-0.05
A_06_P5161	RPL26A || protein biosynthesis || structural constituent of ribosome* || YLR344W || 1081839	1	-2.12	-2.64	-5.04	-4.99	-4.58	-2.93	-0.32	-0.56	-3.14	-4.08	-3.05	-2.1
A_06_P1244	|| || || YBL109W || 1081840	1		0.2	0.65	0.76	0.31		0.01	0.03		-0.09	0.05	0.1
A_06_P1016	OLI1 || protein complex assembly* || structural molecule activity* || Q0130 || 1081841	1	1.82	1.62	0.3	3.06	5.29	5.73	-1.56	1.43	2.81	1.93	2.54	3.77
A_06_P1571	LEU2 || leucine biosynthesis || 3-isopropylmalate dehydrogenase activity || YCL018W || 1081842	1	-0.56	0.2	-2.85	-2.57	-2.24	-2.85	-0.2	0.67	-2.14	-2.82	-2.12	-1.16
A_06_P6159	TRM112 || tRNA methylation || tRNA (guanine-N2-)-methyltransferase activity* || YNR046W || 1081843	1	-1.2	-1.03	-0.59	-0.12	-0.36	-0.19	-0.1	-0.16	-1.76	-1.55	-1.07	-0.87
A_06_P1424	SEC66 || filamentous growth* || protein transporter activity || YBR171W || 1081844	1	-1.09	-1.21	-2.21	-2.25	-1.26	-1.56	-0.16	-0.14	-0.9	-1.06	-1.2	-1.5
A_06_P4179	FAR1 || signal transduction during conjugation with cellular fusion* || cyclin-dependent protein kinase inhibitor activity || YJL157C || 1081845	1	-2.87	-1.36	-2.25	-3.25	-3.22	-3.45	0.07	-1.14	-0.79	-0.29	-0.98	-1.56
A_06_P3948	MLP2 || mRNA-nucleus export* || ribonucleoprotein binding || YIL149C || 1081846	1	-0.58	-0.2	-0.01	-0.34	-0.54	-0.11	0.04	-0.49	-0.84	-0.64	-0.66	-1.02
A_06_P7135	SRP54 || protein-ER targeting* || GTPase activity* || YPR088C || 1081847	1	-0.25	-0.09	-0.44	-0.88	-0.71	-0.56	0.33	-0.64	-0.79	-0.51	-0.7	-0.69
A_06_P7189	KAR3 || meiosis* || microtubule motor activity* || YPR141C || 1081848	1	-0.85	-1	-1.68	-1.49	-2.18	-1.91	-0.35	0.23	-0.27	0.2	0.28	-0.67
A_06_P3354	PEX4 || peroxisome organization and biogenesis* || ubiquitin conjugating enzyme activity || YGR133W || 1081849	1	0.08	0.06	0.7	0.88	0.42	1.02	0.25	-0.54	-0.74	-0.48	0.16	0.45
A_06_P6827	|| biological process unknown || molecular function unknown || YPL068C || 1081850	1	-2.28	-1.98	-1.68	-1.65		-2.08	-0.79	-1.03	-1.84	-1.54	-1.16	-1.62
A_06_P4961	PEP3 || late endosome to vacuole transport* || protein binding || YLR148W || 1081851	1	0.25	0.45	0.62	0.58	0.65	0.07	0.11	0.26	0.41	0.32	0.21	0.04
A_06_P4737	BAS1 || transcription from RNA polymerase II promoter* || RNA polymerase II transcription factor activity || YKR099W || 1081852	1	-2.67	-2.77	-3.15	-1.58	-2.15	-1.3	-0.88	-1.65	-3.48	-3.05	-2.04	-1.24
A_06_P6275	|| biological process unknown || molecular function unknown || YOL083W || 1081853	1	2.72	3.33	4.28	4.36	5.39	5.1	0.39	1.66	2.85	2.7	2.63	3.17
A_06_P4847	MLH2 || DNA repair || molecular function unknown || YLR035C || 1081854	1	-0.42	0.2	0.02	0.23		0.16	-0.16	-0.79	-0.41	-0.13	0.15	-0.52
A_06_P3248	MSP1 || protein-mitochondrial targeting || ATPase activity || YGR028W || 1081855	1	1.46	1.4	1.96	1.71	1.53	0.92	0.22	1.23	1.81	1.71	1.26	1.51
A_06_P6021	MPA43 || biological process unknown || molecular function unknown || YNL249C || 1081856	1	-0.58	-0.32	-0.2	0.87	0.23	0.63	-0.24	-0.24	-0.32	-0.39	-0.49	-0.3
A_06_P2257	MSW1 || tryptophanyl-tRNA aminoacylation || tryptophan-tRNA ligase activity || YDR268W || 1081857	1	0.05	0.35	-0.24	-0.7	-0.43	-1.78	0.17	0.61	0.2	-0.02	-0.27	-0.04
A_06_P4695	RPS21A || protein biosynthesis || structural constituent of ribosome || YKR057W || 1081858	1	-2.19	-2.49	-4.61	-4.82	-4.31	-3.13	0.22	-0.42	-3.41	-3.87	-3.19	-2.23
A_06_P5725	MRPL33 || protein biosynthesis || structural constituent of ribosome || YMR286W || 1081859	1	0.29	0.8	0.11	0.65	0.8	0.53	-0.06	0.9	0.56	0.49	0.33	0.33
A_06_P1139	|| biological process unknown || molecular function unknown || YBL010C || 1081860	1	-0.41	-1.07	-1.06	-2.2		-2.8	0.07	-0.21	0.25	0.11	-0.35	-0.76
A_06_P1770	SIR2 || chromatin silencing at telomere* || histone deacetylase activity* || YDL042C || 1081861	1	-0.67	-0.87	-0.59	0.08	0.63	0.45	-0.03	-0.32	-0.71	-0.71	-0.32	0.16
A_06_P2245	CTA1 || oxygen and reactive oxygen species metabolism || catalase activity || YDR256C || 1081862	1	0.62	0.52	5.76	6.6	6.64	6.64	-0.35	-0.04	-0.23	-0.37	0.33	2.29
A_06_P5680	YHM2 || mitochondrial genome maintenance* || DNA binding* || YMR241W || 1081863	1	-2.16	-2.49	-2.33	-2.79	-2.76	-3.44	-0.28	0.03	-2.18	-2.39	-2.08	-1.7
A_06_P4185	|| biological process unknown || molecular function unknown || YJL163C || 1081864	1	3.79	4.12	4.17	4.14	4.12	4.34	1.42	1.71	3.98	4.01	3.59	4.02
A_06_P1376	|| || || YBR124W || 1081865	1	0.35		0.16
A_06_P6427	CYT1 || mitochondrial electron transport, ubiquinol to cytochrome c* || electron transporter, transferring electrons within CoQH2-cytochrome c reductase complex activity || YOR065W || 1081866	1	2.85	2.7	3.46	2.68	2.95	1.45	0.18	1.86	2.11	1.78	2.02	1.93
A_06_P2000	|| || || YDR015C || 1081867	1	1.23	0.07	-0.26				0.11
A_06_P1882	ATG9 || protein-vacuolar targeting* || molecular function unknown || YDL149W || 1081868	1	1.87	2.14	3.11	3.1	3.27	3.56	0.72	1.01	2.27	2	2.05	2.13
A_06_P1712	MSH3 || DNA recombination* || damaged DNA binding || YCR092C || 1081869	1	-1.25	-0.66	-1.65	-1.13	-1.41	-1.67	-0.09	0.21	-0.16	-0.21	-0.58	-0.59
A_06_P5508	NAM7 || mRNA catabolism* || ATP-dependent RNA helicase activity* || YMR080C || 1081870	1	-0.78	-0.74	-0.77	-0.89	-1	-0.48	-0.25	-1.54	-1.42	-1.16	-1.14	-1.21
A_06_P6529	RPS28A || protein biosynthesis || structural constituent of ribosome || YOR167C || 1081871	1	-1.67	-1.5	-3.14	-3.41	-3.1	-2.15	0.63	0.21	-2.45	-2.56	-2.27	-1.49
A_06_P1781	SLC1 || sphingolipid biosynthesis || 1-acylglycerol-3-phosphate O-acyltransferase activity || YDL052C || 1081872	1	-0.02	0.09	-0.84	-0.78	-0.76	-0.97	0.3	0.92	0.11	0.12	0.2	-0.06
A_06_P3255	|| biological process unknown || molecular function unknown || YGR035C || 1081873	1	0.18	-0.83	-0.15			-0.41	0.06
A_06_P5626	GCV2 || one-carbon compound metabolism* || glycine dehydrogenase (decarboxylating) activity || YMR189W || 1081874	1	-2.1	-3.18	-3.42	-3.46	-2.95	-1.94	0.27	-0.9	-1.84	-1.8	-1.93	-2.33
A_06_P1199	PRS4 || histidine biosynthesis* || ribose phosphate diphosphokinase activity || YBL068W || 1081875	1	-1.62	-2.22	-2.82	-1.95	-1.95	-2.64	-0.47	-0.81	-4.07	-4.13	-2.58	-2
A_06_P4459	|| biological process unknown || molecular function unknown || YKL050C || 1081876	1	-0.57	-0.11	0.97	2.33	4.11	5.18	-0.24	-0.99	0.15	0.71	1.13	2.34
A_06_P5726	MSU1 || RNA catabolism || exoribonuclease II activity || YMR287C || 1081878	1	0.02	0.3	-0.08	0.51	1.22	0.36	-0.24	0.49	0.61	0.65	0.66	0.65
A_06_P5908	NAM9 || protein biosynthesis || structural constituent of ribosome || YNL137C || 1081879	1	0.25	0.9	1.09	-0.07	-0.81	-0.28	0.22	-0.71	-0.25	-0.24	-0.32	-0.81
A_06_P1059	FUN12 || translational initiation || GTPase activity* || YAL035W || 1081880	1	-1.39	-1.14	-2.23	-2.45	-2.35	-1.93	-0.12	-1.02	-2.82	-2.82	-2.2	-2.06
A_06_P5478	|| || || YMR052C-A || 1081881	1	2.38	2.52	3.05	2.79	3.84	3.51	0.47	1.19	2.32	2.69	2.65	3.68
A_06_P6778	VTC3 || vacuole fusion, non-autophagic || molecular function unknown || YPL019C || 1081882	1	0.3	0.41	0.13	0.22	-0.14	-0.3	0.07	0.41	0.28	0.19	0.02	-0.06
A_06_P3275	MUP1 || sulfur amino acid transport || L-methionine porter activity || YGR055W || 1081883	1	-0.15	1.56	0.52	0.48	-0.73	1	0.21	-1.11	-1.08	-1.72	-1.44	-1.6
A_06_P3022	NPY1 || NADH metabolism || NAD+ diphosphatase activity || YGL067W || 1081884	1	-0.74	-0.54	-1.23	-1.36	-2.02	-2.04	0.02	0.02	-0.28	-0.33	-0.47	-0.99
A_06_P5342	SPC2 || signal peptide processing || protein binding || YML055W || 1081885	1	0.14	-0.17	-1.19	-0.85	-0.33	-0.63	0.07	1.23	-0.01	0.02	0.2	0.96
A_06_P6701	TEA1 || transcription || DNA binding || YOR337W || 1081886	1	-3.35	-2.9	-3	-2.79	-2.79	-2.22	-0.56	-2	-1.54	-1.2	-0.9	-0.18
A_06_P2208	|| ubiquitin-dependent protein catabolism || protein binding || YDR219C || 1081887	1	0.87	0.43	1.06	1.34	0.98	0.82	0.05	0.73	0.96	1.11	0.79	-0.09
A_06_P1075	|| biological process unknown || molecular function unknown || YAL049C || 1081888	1	0.54	1.12	0.84	1.48	0.79	1.07	-0.03	0.66	1.7	1.72	1.54	1.43
A_06_P3251	|| biological process unknown || molecular function unknown || YGR031W || 1081890	1	0.99	0.95	1.89	0.68	0.14	0.13	0.39	-1.39	-0.36	0.08	-0.26	-0.34
A_06_P5811	|| biological process unknown || molecular function unknown || YNL040W || 1081892	1	-0.12	-0.1	-0.62	-0.06	-0.14	-0.66	-0.03	0.02	0.99	0.99	0.38	0.06
A_06_P2056	DOA4 || endocytosis* || endopeptidase activity* || YDR069C || 1081893	1	1.24		1.94	1.93	1.77	1.68	0.09	0.44	1	0.93	0.64	0.95
A_06_P2111	INO2 || positive regulation of transcription from RNA polymerase II promoter* || specific RNA polymerase II transcription factor activity || YDR123C || 1081894	1	-2.26	-1.6	-1.45	-1.29	-0.99	-1.24	-0.12	-1.17	-2.19	-1.9	-1.27	-1.11
A_06_P7021	|| biological process unknown || molecular function unknown || YPL260W || 1081895	1	1.07	1.08	1.43	0.83	1.04	0.92	0.45	0.21	0.81	0.97	0.61	0.56
A_06_P1633	PGK1 || glycolysis* || phosphoglycerate kinase activity || YCR012W || 1081896	1	0.28	1.68	-2.15	-1.13	-2.54	-0.17	0.05	-0.56	0.21	-0.98	0.55	0.23
A_06_P2691	CEM1 || fatty acid biosynthesis || fatty-acid synthase activity || YER061C || 1081897	1	-0.54	-1.07	-0.97	-1.1	-1.26	-0.91	0.03	-0.61	-0.32	-0.58	-1.29	-2.07
A_06_P4844	RAD5 || DNA repair || ATPase activity || YLR032W || 1081898	1	-1.02	-0.87	-1.06	-0.51	-0.52	0.23	-0.18	0.3	-0.31	-0.45	-0.22	0.15
A_06_P5476	CSM3 || mitotic sister chromatid cohesion* || molecular function unknown || YMR048W || 1081900	1	-0.46	-0.61	-0.88	-0.91	-1.12	-0.8	0.2	0.46	0.03	0.1	0.09	0.41
A_06_P1062	CDC19 || glycolysis* || pyruvate kinase activity || YAL038W || 1081901	1	0.33	0.05	-4.46	-3.6	-3.64	-1.03	0.34	-0.24	-0.74	-2.36	-0.85	-0.33
A_06_P1608	|| biological process unknown || molecular function unknown || YCL057C-A || 1081902	1	0.25	1.37	1.71	0.95	0.52	0.38	0.06	0.18	0.24	0.3	0.91	0.71
A_06_P5980	|| biological process unknown || molecular function unknown || YNL208W || 1081903	1	0.61	1.76	1.66	1.61	1.73	1.6	0.64	0.66	1.03	1.43	1.47	1.95
A_06_P7051	ICL2 || propionate metabolism* || methylisocitrate lyase activity || YPR006C || 1081904	1	1.03	1.38	2.04	4.76	5.2	4.83	-0.39	0.84	2.07	2.04	1.79	1.16
A_06_P1733	MED2 || transcription from RNA polymerase II promoter || RNA polymerase II transcription mediator activity || YDL005C || 1081905	1	0.43	0.19	1.38	1.13	0.15	0.37	-0.07	-0.06	-0.61	-0.46	-0.46	-0.69
A_06_P3299	|| biological process unknown || molecular function unknown || YGR079W || 1081906	1	-2.51	-3.93	-2.54	-3.22	-2.87	-2.6	-0.52	-1.92	-3.56	-3.1	-1.48	-0.86
A_06_P2936	|| biological process unknown || helicase activity || YFR038W || 1081907	1	-0.91	-1.17	-0.78	-0.26	-0.93	-0.32	-0.5	-0.97	-0.93	-0.98	-0.71	-0.64
A_06_P3928	TAO3 || cellular morphogenesis* || molecular function unknown || YIL129C || 1081909	1	-0.1	0.52	0.21	0.71	1.15	0.88	-0.02	0.25	0.58	0.65	0.6	0.55
A_06_P6795	PMA2 || regulation of pH* || hydrogen-exporting ATPase activity, phosphorylative mechanism || YPL036W || 1081910	1	-1.71	-1.73	-3.49	-1.89	-0.63	0.51	-0.4	-1.96	-1.15	-0.81	0.06	-0.08
A_06_P1104	CDC15 || protein amino acid phosphorylation* || protein kinase activity || YAR019C || 1081911	1	0.84	0.86	1.55	2.31	2.22	1.73	-0.22	0.71	1.01	0.92	0.69	0.61
A_06_P1969	GYP7 || vesicle-mediated transport || Rab GTPase activator activity || YDL234C || 1081912	1	1.84	1.17	2.42	2.57	2.97	2.62	0.28	0.24	1.06	0.94	1.21	1.59
A_06_P3980	DJP1 || peroxisome matrix protein import || chaperone binding || YIR004W || 1081913	1	0.29	0.21	0.39	0.13	0.49	-0.03	0	-0.04	0.13	0.22	0.07	0.04
A_06_P6255	|| biological process unknown || molecular function unknown || YOL063C || 1081914	1	0.48	0.78	0.68	0.96	0.93	1.26	0.04	0.56	0.41	0.57	0.53	0.73
A_06_P5534	PGM2 || glucose 1-phosphate utilization* || phosphoglucomutase activity || YMR105C || 1081915	1	6.45	6.54	4.9	4.04	4.31	3.58	0.7	3.03	4.94	4.62	4.44	3.51
A_06_P6362	ALG6 || protein amino acid glycosylation* || transferase activity, transferring hexosyl groups || YOR002W || 1081916	1	-0.68	-0.23	-0.11	0.05	-0.28	-0.13	-0.23	-0.65	-0.1	-0.29	-0.33	-1.25
A_06_P1786	|| biological process unknown || molecular function unknown || YDL057W || 1081917	1	0.98	1.27	1.79	2.21	0.69	1.18	0.39	0.59	2.69	2.34	1.75	1.52
A_06_P4573	|| biological process unknown || molecular function unknown || YKL162C || 1081918	1	2.79	1.93	3.06	3.33	3.63	2.75	-0.08	1.17	1.76	1.55	1.61	2.18
A_06_P6435	SGO1 || mitotic sister chromatid segregation* || molecular function unknown || YOR073W || 1081919	1	-0.13	-0.12	-0.78	-0.59	-0.51	-1.03	0.2	0.93	0.03	0.58	0.12	-0.08
A_06_P4315	NPA3 || aerobic respiration || protein binding || YJR072C || 1081921	1	-1.4	-1.48	-2.02	-1.65	-1.01	-0.23	-0.28	-1.2	-3	-2.92	-1.57	-0.7
A_06_P2995	HEM2 || heme biosynthesis || porphobilinogen synthase activity || YGL040C || 1081922	1	0.5	1.26	0.87	0.28	-0.98	-0.96	-0.02	0.64	-0.12	-0.3	-0.02	-0.3
A_06_P6350	|| biological process unknown || molecular function unknown || YOL157C || 1081923	1	1.44	1.82	2.3	2.42	2.81	2.65	-0.13	0.15	0.29	0.33	0.26	0.51
A_06_P4700	TFA2 || transcription initiation from RNA polymerase II promoter || general RNA polymerase II transcription factor activity || YKR062W || 1081924	1	0.75	0.42	0.81	0.74	0.9	0.16	0.33	0.26	0.57	0.49	0.18	0.21
A_06_P4959	SPE4 || pantothenate biosynthesis* || spermine synthase activity || YLR146C || 1081925	1	-1.5	-1.78	-2.83	-2.44	-2.51	-2.41	-0.59	-0.68	-1.59	-2.17	-1.54	-1.83
A_06_P3215	|| biological process unknown || molecular function unknown || YGL258W-A || 1081926	1
A_06_P7248	ARR2 || response to arsenic || arsenate reductase activity || YPR200C || 1081927	1		0.69	1.52	1.02		2.53	0.23	-1.04			-0.02
A_06_P3417	FYV8 || biological process unknown || molecular function unknown || YGR196C || 1081928	1	0	0.18	0.27	0.64	0.47	0.32	-0.23	0.35	-0.11	-0.05	0.14	-0.02
A_06_P1029	ERP2 || ER to Golgi transport || molecular function unknown || YAL007C || 1081929	1	-0.7	-1.04	-2.25	-3.63	-3.19	-3.57	0.28	-0.45	-0.85	-0.89	-1.23	-1.24
A_06_P4274	GEA1 || ER to Golgi transport* || ARF guanyl-nucleotide exchange factor activity || YJR031C || 1081930	1	-0.67	-1.12	-1.62	-1.08	-1.28	-1.16	0.07	-0.18	-0.75	-0.27	-0.28	-0.35
A_06_P5341	CYB2 || electron transport || L-lactate dehydrogenase (cytochrome) activity || YML054C || 1081932	1	5.05	5.01	5.17	4.92	6.61	6.03	0.48	1.64	2.84	2.59	2.52	2.86
A_06_P5587	RIM13 || protein processing || cysteine-type endopeptidase activity || YMR154C || 1081933	1	0.67	0.46	0.87	1.3	0.3	0.27	0.14	0.08	1.32	1.41	0.2	0
A_06_P3117	SUT1 || regulation of transcription from RNA polymerase II promoter* || transcription factor activity* || YGL162W || 1081934	1	-0.61	-0.46	0.25	0.85	0.98	-0.6	-0.62	-0.03	-0.99	-0.75	-1.04	-1.18
A_06_P5487	SAM37 || outer mitochondrial membrane organization and biogenesis || protein binding || YMR060C || 1081935	1	0.43	0.83	1.05	0.82	0.51	0.41	0.3	0.45	0.07	0.11	0	-0.23
A_06_P3981	IST3 || spliceosome assembly || RNA splicing factor activity, transesterification mechanism || YIR005W || 1081936	1	0.37	0.09	0.34	1.14	1.82	0.73	-0.04	0.93	1.91	1.86	0.75	1.64
A_06_P4588	ZRT3 || zinc ion homeostasis* || zinc ion transporter activity || YKL175W || 1081937	1	-0.46	-0.51	-0.31	0.45	0.05	0.11	-0.12	-0.08	0.15	0.21	0.26	0.23
A_06_P4684	PET10 || aerobic respiration || molecular function unknown || YKR046C || 1081938	1	1.44	2.61	2.89	2.15	2.31	3.04	0.56	-0.68	2.37	2.58	2.65	3.3
A_06_P2899	SAD1 || nuclear mRNA splicing, via spliceosome || RNA splicing factor activity, transesterification mechanism || YFR005C || 1081939	1	-0.68	-0.61	-1.3	-1.52	-1.31	-1.7	0.2	-0.63	-0.14	-0.2	-0.49	-0.86
A_06_P4079	BIT61 || biological process unknown || molecular function unknown || YJL058C || 1081940	1	-0.17	-0.51	-0.45	0.01	0.16	-1.29	-0.32	0.12	-0.28	-0.43	-0.28	-0.34
A_06_P5845	MLF3 || response to drug || molecular function unknown || YNL074C || 1081942	1	0.81	0.53	0.71	-0.48	-0.01	0.02	0.46	-0.15	0.86	0.8	0.36	0.35
A_06_P1604	PBN1 || GPI anchor biosynthesis* || mannosyltransferase activity || YCL052C || 1081943	1	1.61	1.19	1.47	1.55	1.28	1.31	0.03	0.78	1.48	1.37	1.1	0.74
A_06_P5318	TSA1 || response to oxidative stress* || thioredoxin peroxidase activity || YML028W || 1081945	1	0.85	1.22	-0.32	-0.47	-0.83	-0.32	0.35	0.7	0.53	0.23	0.48	0.9
A_06_P6801	SSN3 || protein amino acid phosphorylation* || general RNA polymerase II transcription factor activity* || YPL042C || 1081946	1	-0.04	-0.15	0.14	-0.31	-0.27	-0.29	-0.15	-0.74	-0.38	-0.21	-0.36	-0.35
A_06_P3136	GTS1 || sporulation (sensu Fungi)* || molecular function unknown || YGL181W || 1081947	1	1.1	1	1.57	0.94	0.24	0.44	0.08	0.45	0.72	0.65	0.36	-0.08
A_06_P1304	MUM2 || premeiotic DNA synthesis || molecular function unknown || YBR057C || 1081948	1	0.45	0.25	0.99	1.58	1.77	1.22	0.05	0.86	1.01	0.91	0.53	0.07
A_06_P2921	HIS2 || histidine biosynthesis || histidinol-phosphatase activity || YFR025C || 1081949	1	-0.19	-0.42	-1.17	-0.95	-1.3	-1.88	0.18	0.52	1.26	1.1	0.39	0.05
A_06_P3708	|| biological process unknown || molecular function unknown || YHR132W-A || 1081950	1	1.77	1.52	1.84	2.69	3.05	3.37	0.13	0.7	1.06	1.02	0.59	0.74
A_06_P6008	SIN4 || transcription from RNA polymerase II promoter || RNA polymerase II transcription mediator activity || YNL236W || 1081951	1	0.03	0.2	-0.26	-0.33	0.13	-0.8	0.18	0.91	0.22	0.23	-0.11	0.08
A_06_P5403	COQ5 || aerobic respiration* || 2-hexaprenyl-6-methoxy-1,4-benzoquinone methyltransferase activity || YML110C || 1081952	1	-0.07	1.51	0.52	-0.99	-1.17	-0.67	0.09	-1.11	-0.36	-0.44	-0.44	-0.57
A_06_P6242	GAL11 || transcription from RNA polymerase II promoter || RNA polymerase II transcription mediator activity || YOL051W || 1081953	1	0.42	0.46	1.14	0.97	1.3	1.22	0.25	-0.55	0.54	0.64	0.58	0.9
A_06_P3067	TAF6 || transcription initiation from RNA polymerase II promoter* || general RNA polymerase II transcription factor activity || YGL112C || 1081954	1	-0.48	-0.59	-0.84	0.17	-0.84	-0.74	-0.22	0.31	-0.49	-0.4	-0.41	-1
A_06_P5256	LSM3 || nuclear mRNA splicing, via spliceosome* || RNA binding || YLR438C-A || 1081955	1	-0.08	-0.18	0.05	-0.79	-0.16	-0.3	-0.14	-0.65	-0.81	-0.69	-0.34	-0.02
A_06_P5244	|| biological process unknown || molecular function unknown || YLR426W || 1081956	1	-0.26	-0.12	0.05	-0.21	-0.59	0.04	-0.06	-0.29	0.49	0.58	0.41	0.11
A_06_P6132	|| biological process unknown || molecular function unknown || YNR021W || 1081957	1	-0.9	-0.77	-1.29	-1.32	-1.75	-1.5	0.05	-0.39	-0.74	-0.89	-1.07	-1.72
A_06_P4928	CFT2 || mRNA polyadenylylation* || RNA binding || YLR115W || 1081958	1	-0.03	0.07	0.28	0.23	0.08	-0.45	0.17	-0.26	-0.18	-0.23	-0.42	-0.46
A_06_P2452	|| biological process unknown || molecular function unknown || YDR459C || 1081959	1	-0.05	-0.4	-0.34	-0.06	-0.71	-0.4	-0.12	0.24	0.43	0.48	0.2	-0.05
A_06_P1387	CKS1 || transcription* || protein kinase activator activity || YBR135W || 1081960	1	-1.13	-0.95	-1.22	-0.64	-0.69	-0.33	-0.19	-0.1	-0.35	-0.26	-0.46	-1.16
A_06_P6178	|| biological process unknown || molecular function unknown || YNR065C || 1081961	1	-0.04	-0.17	0.05	0.39	-0.14	0.02	-0.3	0.22	0.17	0.23	0.34	0.8
A_06_P4288	SSC1 || protein folding* || ATPase activity* || YJR045C || 1081962	1	0.34	2.27	1.39	-0.2	-0.28	0.2	0.8	-0.4	-0.75	-0.58	-0.4	-0.25
A_06_P3675	|| biological process unknown || molecular function unknown || YHR100C || 1081963	1	-1.09	-1.41	-1.56	-0.24	-0.17	-0.32	-0.22	0.08	0.6	0.41	0.29	0.31
A_06_P4352	CPA2 || arginine biosynthesis || carbamoyl-phosphate synthase (glutamine-hydrolyzing) activity || YJR109C || 1081964	1	-0.54	-2.36	-2.39	-1.41	-1.03	-2.26	-0.02	-0.09	-1.76	-2.15	-1.92	-0.88
A_06_P2272	GCN2 || protein amino acid phosphorylation* || protein kinase activity* || YDR283C || 1081965	1	-0.28	0.04	0.32	0.94	0.56	0.99	-0.11	0.27	0.78	1.03	0.66	0.43
A_06_P3804	|| transport* || transporter activity* || YIL006W || 1081966	1		1.09	1.16	1.23	-0.01	0.56	0.31	0.06	0.96	1.28	0.68	-0.12
A_06_P7116	MED1 || transcription from RNA polymerase II promoter || RNA polymerase II transcription mediator activity || YPR070W || 1081967	1	-0.34	-0.25	-0.41	-0.74	-1.26	-1	-0.04	-0.37	-0.91	-0.91	-1.05	-1.65
A_06_P1802	|| biological process unknown || molecular function unknown || YDL073W || 1081968	1	-1.32	-0.95	-1.04	-1.21	-0.28	-0.52	0.24	-0.47	-0.82	-0.5	-0.43	-0.18
A_06_P1295	RPS11B || protein biosynthesis* || structural constituent of ribosome || YBR048W || 1081969	1	-1.76	-2.24	-4.93	-5.17	-5.17	-3.42	-0.39	-0.88	-2.98	-4.28	-3.12	-2.88
A_06_P4560	SDH1 || tricarboxylic acid cycle* || succinate dehydrogenase (ubiquinone) activity || YKL148C || 1081970	1	3.53	3.88	5.88	4.29	4.21	2.87	0.74	1.18	2.07	2.09	1.82	1.54
A_06_P6127	ACC1 || protein-nucleus import* || acetyl-CoA carboxylase activity* || YNR016C || 1081971	1	0.43	0.59	-1.38	-0.17	0.46	0.45	0.3	0.74	0.38	0.1	0.67	1.34
A_06_P2696	|| || || YER066C-A || 1081972	1										-0.51	-0.5
A_06_P3473	GCN5 || histone acetylation* || histone acetyltransferase activity* || YGR252W || 1081973	1	0.29	-0.05	0.03	0.26	-0.15	-0.38	0.17	0.49	0.2	0.49	0.2	-0.13
A_06_P3524	SHU1 || error-free DNA repair || molecular function unknown || YHL006C || 1081974	1	0.7	1.18	1.85	0.75	1.07	0.8	0.61	-0.73	0.67	0.96	0.63	1.16
A_06_P4157	RPS21B || protein biosynthesis || structural constituent of ribosome || YJL136C || 1081975	1	-2.03	-2.46	-4.5	-5.14	-4.68	-3.48	0.19	-0.56	-3.55	-4.19	-3.38	-2.43
A_06_P5630	|| || || YMR193C-A || 1081976	1	-0.2	-0.54	-0.1	-1.41	1.53	0.63	0.28	-0.57	-0.12	-0.17	-0.4	0.78
A_06_P4613	MNN4 || response to stress* || molecular function unknown || YKL201C || 1081977	1	0.53	1.71	0.77	0.45	1.51	0.42	0.36	0.37	1.33	0.96	0.38	0.41
A_06_P1531	|| || || YBR277C || 1081978	1			0.43	-1.09				-0.37			0.18
A_06_P4696	GLG1 || glycogen biosynthesis || glycogenin glucosyltransferase activity || YKR058W || 1081979	1	4.22	4.2	4.26	4.17	4.46	4.79	0.83	2.03	3.04	3.03	2.48	1.88
A_06_P2780	SCC4 || sister chromatid cohesion* || molecular function unknown || YER147C || 1081980	1	-0.52	-0.57	0.62	0.83	1.18	0.68	-0.19	-0.89	-0.66	-0.45	-0.05	0.92
A_06_P5946	|| || || YNL174W || 1081981	1	-0.46	-1.13	-2.21				-0.87	-0.93			-1.48
A_06_P6643	|| || || YOR282W || 1081982	1	0.57	-0.34	-0.59				0.26	-0.25	-0.85		-0.93	-0.86
A_06_P2013	REG1 || negative regulation of transcription from RNA polymerase II promoter* || protein phosphatase type 1 activity* || YDR028C || 1081983	1	0.58	0.67	0.94	0.59	-0.06	0.64	0.05	-0.35	-0.35	-0.1	-0.01	0.37
A_06_P1164	STU1 || microtubule nucleation || structural constituent of cytoskeleton || YBL034C || 1081984	1	-0.72	-0.71	-0.75	-0.86	-0.93	-0.68	-0.24	-0.71	-0.45	-0.02	-0.28	-0.35
A_06_P6437	UFE1 || vesicle fusion* || t-SNARE activity || YOR075W || 1081985	1	0.37	0.04	1.17	1.59	1.53	1.4	0.29	0.87	0.47	0.57	0.61	0.53
A_06_P3793	|| || || YHR214W-A || 1081986	1	0.6	2.46	1.76	1.42	0.88	1.69	0.11	-0.53	1.85	2.28	1.8	1.54
A_06_P5929	|| biological process unknown || molecular function unknown || YNL158W || 1081987	1	-0.39	-0.38	0	-0.26		-1.09	-0.28	-0.7	-0.68	-0.62	-0.67	-1.69
A_06_P3893	LYS12 || lysine biosynthesis || homoisocitrate dehydrogenase activity || YIL094C || 1081988	1	-0.33	-1.71	-4.35	-3.21	-3	-2.2	-0.35	-0.47	-2.21		-2.26	-1.36
A_06_P2724	IES5 || biological process unknown || molecular function unknown || YER092W || 1081989	1	-0.28	0.49	-0.03	0.06	-0.08	0.01	0.45	0.28	-0.01	-0.08	-0.4	0.08
A_06_P1723	|| biological process unknown || molecular function unknown || YCR102C || 1081990	1	-0.24			0.14		-0.42	0.24	-0.32		-0.04	0.41	0.82
A_06_P5133	TAD3 || tRNA modification || tRNA specific adenosine deaminase activity || YLR316C || 1081991	1	-1.7	-1.32	-1.73	-1.3	-1.17	-0.88	-0.16	-0.3	-1.71	-1.62	-1.23	-0.74
A_06_P5743	PRP12 || rRNA processing* || exonuclease activity || YMR302C || 1081992	1	1.49	1.66	2.24	1.84	2.48	2	0.52	0.5	1.46	1.62	1.51	1.69
A_06_P5116	EXG1 || cell wall organization and biogenesis* || glucan 1,3-beta-glucosidase activity || YLR300W || 1081993	1	-2.1	-1.04	-3.51	-3.14	-4.19	-3.42	-0.71	-0.09	0.08	0.04	0.09	-0.18
A_06_P1216	CDC27 || mitotic sister chromatid segregation* || protein binding* || YBL084C || 1081994	1	0.95	0.94	2.14	2.46	2.12	2.14	-0.14	0.53	1.17	1.17	1.12	0.98
A_06_P2734	AST2 || biological process unknown || molecular function unknown || YER101C || 1081995	1	1.05	1.53	2.43	3.24	3.13	3.08	-0.17	0.7	0.84	0.65	1.07	1.18
A_06_P1129	|| biological process unknown || molecular function unknown || YAR075W || 1081996	1	-0.86	-1.52	-4.28	-3.89		-4.08	-0.64	0.03	-0.97	-1.56	-2.65	-4.46
A_06_P3265	|| biological process unknown || molecular function unknown || YGR045C || 1081997	1		0.58				0.76
A_06_P6475	AZF1 || regulation of transcription, DNA-dependent* || DNA binding* || YOR113W || 1081998	1	1	1.74	2.92	0.99	1.22	2.14	0.78	-1.39	0.32	0.5	0.08	0.01
A_06_P4067	RTT101 || ubiquitin-dependent protein catabolism* || protein binding* || YJL047C || 1081999	1	0.41	0.23	0.84	0.93	0.38	0.58	0.04	-0.3	-0.11	-0.08	-0.18	0.3
A_06_P3591	RPS27B || protein biosynthesis || structural constituent of ribosome || YHR021C || 1082000	1	-1	-2.08	-4.9	-4.88	-3.8	-1.69	0.17	0.32	-2.91	-4.2	-2.87	-0.93
A_06_P5200	NAM2 || Group I intron splicing* || mRNA binding* || YLR382C || 1082001	1	0.63	0.95	0.74	0.43	0.52	0.64	0.39	0.11	0.47	0.51	0.15	0.29
A_06_P3790	|| || || YHR212C || 1082002	1	0.55	0.43	1.6	1.14	1.06	1.06	0.06	-0.64	-0.23	0.06	-0.18	0.27
A_06_P7141	RDS3 || nuclear mRNA splicing, via spliceosome* || transcription factor activity || YPR094W || 1082004	1	0.41	0.33	0.14				-0.37
A_06_P3845	PIG2 || biological process unknown || protein phosphatase regulator activity || YIL045W || 1082005	1	4.18	3.92	4.49	4.38	4.32	4.34	0.64	1.94	4.17	4.33	4.34	4.52
A_06_P3296	MRPL25 || protein biosynthesis || structural constituent of ribosome || YGR076C || 1082006	1	1.01	1.55	1.38	1.47	1.89	0.34	-0.22	1.03	0.79	0.43	0.45	0.6
A_06_P3886	|| biological process unknown || molecular function unknown || YIL087C || 1082007	1	2.57	3.68	3.6	3.99	3.38	3.78	-0.34	1.14	2.6	2.32	2.71	2.37
A_06_P2766	GLC7 || 35S primary transcript processing* || RNA binding* || YER133W || 1082009	1	0.87	0.79	1	0.4	0.23	0.46	-0.08	-0.46	0.5	0.53	0.47	0.09
A_06_P1035	DEP1 || regulation of transcription from RNA polymerase II promoter* || molecular function unknown || YAL013W || 1082010	1	0.3	0.64	1.76	-0.24	-0.95	0.18	0.44	-1.54	-0.48	-0.04	-0.47	-0.86
A_06_P1858	PCL2 || cell cycle || cyclin-dependent protein kinase regulator activity || YDL127W || 1082011	1	-1.45	-1.43	-1.07	-0.76		-1.28	0.13	-0.24	-0.12	-0.18	-0.07	-0.4
A_06_P4785	VPS13 || sporulation (sensu Fungi)* || molecular function unknown || YLL040C || 1082012	1	0.7	1.44	1.7	1.62	1.39	1.67	0.13	0.36	1.07	1.12	0.99	1.14
A_06_P1329	SPT7 || protein complex assembly* || structural molecule activity || YBR081C || 1082013	1	-0.37	0	0.07	0.07	-0.28	0.19	-0.06	-0.04	-0.32	-0.16	-0.18	-0.18
A_06_P1510	RIB5 || riboflavin biosynthesis || riboflavin synthase activity || YBR256C || 1082014	1	0.67	0.53	1.37	1.27	1.57	1.67	0.06	0.04	0.37	0.4	0.19	0.13
A_06_P1778	KNH1 || beta-1,6 glucan biosynthesis || molecular function unknown || YDL049C || 1082015	1	0.41	0.04	-0.56	-0.23	1.61	0.38	0.25	-0.48	-0.8	-0.9	-0.2	0.65
A_06_P3631	MED6 || transcription from RNA polymerase II promoter || RNA polymerase II transcription mediator activity || YHR058C || 1082016	1	-0.56	-0.74	-0.54	-0.62	-1.54	-0.89	-0.14	-1.06	-0.77	-0.61	-1.01	-1.13
A_06_P4872	FRS1 || phenylalanyl-tRNA aminoacylation || phenylalanine-tRNA ligase activity || YLR060W || 1082017	1	-0.75	-0.9	-3.02	-4.03	-4.93	-4.24	-0.25	-0.79	-2.12	-2.23	-2.04	-2.55
A_06_P2938	SAP155 || G1/S transition of mitotic cell cycle || protein serine/threonine phosphatase activity || YFR040W || 1082019	1	0.68	0.9	1.6	1.29	0.86	0.89	0.19	-0.24	-0.29	-0.07	0.04	-0.34
A_06_P4252	HYS2 || nucleotide-excision repair* || delta DNA polymerase activity || YJR006W || 1082020	1	-0.28	-0.3	-0.1	-0.75	-0.91	-0.72	0.16	-0.09	-0.04	-0.03	-0.5	-0.68
A_06_P2127	RUB1 || protein deneddylation* || protein tag || YDR139C || 1082021	1	-0.6	-0.79	-1.93	-1.06	-0.78	-1.01	-0.81	0.94	0.02	0.07	-0.07	0.15
A_06_P7171	CTR1 || copper ion import || copper uptake transporter activity || YPR124W || 1082022	1	-0.56	-0.26	-0.76	-0.43	-0.82	-1.46	-0.53	0.13	-0.72	-0.47	-0.31	-0.27
A_06_P3612	BCD1 || snoRNA metabolism || nucleic acid binding || YHR040W || 1082023	1	-2.8	-2.54	-2.14	-1.94	-2.07	-0.45	-0.46	-2.32	-3.81	-3.91	-1.85	-1.39
A_06_P6415	|| || || YOR053W || 1082024	1	1.1	0.06	0.36			-0.38	0.02	-0.05	-1.04	-0.57	-0.2
A_06_P2341	TCM10 || protein complex assembly || molecular function unknown || YDR350C || 1082025	1	0.54	0.56	0.94	1.05	0.25	0.89	0	-0.1	0.57	0.5	0.33	0
A_06_P3796	|| || || YHR217C || 1082026	1	0.79	-0.58	-0.53				-0.01	-0.49
A_06_P2830	BLM3 || protein catabolism* || proteasome activator activity || YFL007W || 1082027	1	-0.21	0.6	0.71	0.13	0.12	1.36	0.1	-2.39	-0.8	-0.67	-0.66	-1.27
A_06_P5417	PHO84 || phosphate transport* || inorganic phosphate transporter activity* || YML123C || 1082028	1		-2.94	-3.67	-3.91			-0.65	-1.49	-4.24	-3.65	-3.16	-3.77
A_06_P5081	PDR8 || response to stress* || DNA binding* || YLR266C || 1082029	1	0.6	0.09	0.9	1.47	2.11	1.51	-0.04	0.73	0.26	0.06	0.12	0.19
A_06_P6535	DCS2 || biological process unknown || molecular function unknown || YOR173W || 1082030	1	5.54	5.52	6.35	5.65	5.79	5.39	0.65	2.74	4.82	4.65	4.49	4.88
A_06_P3739	YAP1801 || endocytosis || clathrin binding || YHR161C || 1082031	1	1.24	1.13	2.09	1.01	0.54	0.87	0.42	-0.53	0.06	0.34	0.16	-0.74
A_06_P6901	|| || || YPL142C || 1082032	1	-1.14	-1.68	-4.44	-2.38	-1.72	-1.09	-1.96	2.09	-0.33	-1.85	-0.92	-0.64
A_06_P2203	AHA1 || response to stress* || chaperone activator activity || YDR214W || 1082033	1	0.04	1.93	2.38	1.61	1.46	1.67	0.18	0.22	0.42	0.71	1.17	1.57
A_06_P7086	TIP41 || signal transduction || molecular function unknown || YPR040W || 1082034	1	0.45	0.38	0.71	1.6	1.84	2.09	-0.05	0.88	0.69	0.66	0.88	0.79
A_06_P5826	POR1 || aerobic respiration* || voltage-gated ion-selective channel activity || YNL055C || 1082035	1	1.73	3.59	2.07	2.75	2.37	2.06	0.04	0.98	2.38	1.9	1.95	1.05
A_06_P6657	|| biological process unknown || molecular function unknown || YOR296W || 1082036	1	-0.51	0.1	-0.01	0.32	0.61	0.42	0.12	0.33	-0.02	0.03	0.03	0.17
A_06_P2576	UTR5 || biological process unknown || molecular function unknown || YEL035C || 1082037	1
A_06_P4572	|| biological process unknown || protein kinase activity || YKL161C || 1082038	1	0.1	-0.06	-0.01	-0.18	-0.57	-0.08	-0.25	-0.18	-0.13	-0.14	0.33	0.52
A_06_P4463	|| || || YKL053W || 1082039	1	1.14	1.27	1	0.03	1	-0.23	-0.32	0.07	0.31	0.43	-0.13	0.74
A_06_P5351	MFT1 || mRNA-nucleus export* || nucleic acid binding || YML062C || 1082040	1	-0.17	0.21	0.48	-0.04	-0.01	0.05	0.39	0.48	0.31	0.59	0.11	0.11
A_06_P6683	HSH49 || nuclear mRNA splicing, via spliceosome || RNA binding || YOR319W || 1082041	1	-0.79	-0.86	-0.25	0.63	0.34	0.5	-0.18	-0.16	-0.33	-0.4	-0.43	-0.67
A_06_P3201	GUS1 || glutamyl-tRNA aminoacylation || glutamate-tRNA ligase activity || YGL245W || 1082042	1	-0.28	-0.26	-1.37	-1.29	-0.96	-0.64	0.1	0.31	-0.09	-0.09	-0.17	-0.03
A_06_P2399	PDR15 || transport || ATPase activity, coupled to transmembrane movement of substances || YDR406W || 1082043	1	2.59	2.9	3.66	3.01	2.73	2.21	0.38	0.23	1.62	1.38	2.18	2.31
A_06_P6536	MED4 || transcription from RNA polymerase II promoter || RNA polymerase II transcription mediator activity || YOR174W || 1082044	1	-0.19	-0.38	-0.46	-0.34	-0.7	-0.6	-0.32	0.3	-0.01	-0.21	-0.46	-0.51
A_06_P1815	NDE2 || ethanol fermentation* || NADH dehydrogenase activity || YDL085W || 1082045	1	4.8	5.63	7.48	5.88	6.64	6.64	0.22	1.34	4		4.14	5.2
A_06_P3895	|| biological process unknown || molecular function unknown || YIL096C || 1082046	1	-3.44	-4.78	-3.98	-2.62	-2.15	-2.38	-1.07	-1.82	-5.23		-2.81	-2.28
A_06_P3903	SHQ1 || snoRNA metabolism || molecular function unknown || YIL104C || 1082047	1	-3	-1.9	-2.14	-1.9	-2.27	-1.89	-0.51	-1.14	-3.27	-3.08	-2.25	-1.63
A_06_P5424	ERO1 || protein folding* || electron carrier activity || YML130C || 1082048	1	-0.99	-0.36	-0.87	-0.92	-0.63	-1.59	-0.06	0.19	-0.34	-0.43	-0.07	-0.19
A_06_P3211	ZRT1 || high-affinity zinc ion transport || high affinity zinc uptake transporter activity || YGL255W || 1082049	1	-1.22	-1.65	-1.04	-0.45	-0.24	-0.11	-0.87	-0.71	-1.4	-1.33	-1.19	-0.99
A_06_P6769	RET3 || retrograde transport, Golgi to ER || protein binding || YPL010W || 1082050	1	-0.55	-0.2	-1.18	-1	-1.03	-1.28	0.31	0.18	0.33	0.34	-0.11	-0.57
A_06_P6989	|| biological process unknown || molecular function unknown || YPL229W || 1082051	1	1.21	0.97	2.1	2.4	2.46	2.15	-0.29	0.26	1.43	1.09	1.19	1.13
A_06_P4944	ACE2 || G1-specific transcription in mitotic cell cycle || transcriptional activator activity || YLR131C || 1082052	1	0.36	0.63	-0.05	0	-0.63	-0.41	0.04	0.56	0.74	1.1	0.38	-0.29
A_06_P2255	|| biological process unknown || molecular function unknown || YDR266C || 1082053	1	-0.84	-0.56	-0.79	-1.82	-1.61	-1.79	0.04	-0.51	-1.33	-1.19	-1.25	-1.11
A_06_P6262	|| biological process unknown || molecular function unknown || YOL070C || 1082054	1	0.01	0.33	0.23	0.13	-1.28	-0.56	0.19	-0.41	0.38	0.6	-0.19	-0.86
A_06_P6662	HUF1 || || || YOR300W || 1082055	1	-0.97	-0.95	-1.95	-1.57			-0.28	0.03	-0.92	-0.59	-0.94	-1.02
A_06_P3362	VPS62 || protein-vacuolar targeting || molecular function unknown || YGR141W || 1082056	1	1.15	1.3	1.84	2.12	1.44	0.96	-0.01	-0.4	0.54	0.58	0.68	0.6
A_06_P6313	RPL18A || protein biosynthesis || structural constituent of ribosome || YOL120C || 1082057	1	-1.78	-2.7	-4.8	-4.38	-4.51	-2.8	-0.8	0.87	-2.37	-4.04	-2.83	-2.26
A_06_P4548	|| || || YKL136W || 1082058	1	0.25	0.46	0.87			0.19	0.53	-0.25			-0.46	-0.5
A_06_P6606	DGA1 || triacylglycerol biosynthesis* || diacylglycerol O-acyltransferase activity || YOR245C || 1082059	1	0.9	0.71	1.36	2.51	2.23	2.03	-0.55	0.61	1.6	1.5	1.49	1.24
A_06_P5781	|| biological process unknown || molecular function unknown || YNL010W || 1082060	1	-0.82	-0.66	-2.15	-1.94	-2.51	-2.5	0.36	0.47	-0.13	-0.03	-0.39	-0.9
A_06_P2478	VPS72 || protein-vacuolar targeting* || molecular function unknown || YDR485C || 1082061	1	0.2	0.2	0.79	0.55	0.13	0.46	-0.11	-0.43	-0.3	-0.17	-0.25	-0.63
A_06_P2220	COX20 || aerobic respiration* || unfolded protein binding || YDR231C || 1082062	1	2.04	1.82	2.91	1.99	2.24	1.98	0.43	0.15	0.89	0.76	0.57	1
A_06_P5673	RNH1 || cell wall organization and biogenesis* || ribonuclease H activity || YMR234W || 1082063	1	-0.53	-0.49	-0.28	0.33	0.27	0	0.06	0.29	0.3	0.32	0.02	-0.68
A_06_P2312	TIM11 || ATP synthesis coupled proton transport || structural molecule activity || YDR322C-A || 1082064	1	0.77	1.27	1.35	1.66	1.82	1.53	-0.24	0.49	1.43	1.26	1	0.87
A_06_P6825	|| biological process unknown || molecular function unknown || YPL066W || 1082066	1	-0.16	0.27	0.96	0.81	0.44	0.47	0.23	0	0.35	0.54	0.43	-0.13
A_06_P2097	|| biological process unknown || kinase activity || YDR109C || 1082067	1	0.22	0.07	0.1	1.01	1.66	1.3	-0.24	0.59	0.5	0.58	0.87	1
A_06_P1576	AGP1 || amino acid transport || amino acid transporter activity* || YCL025C || 1082068	1	0.22	-0.35	-0.33	-0.39	0.18	-0.02	-0.55	-0.68	-0.09	-0.21	-0.21	1.11
A_06_P3931	CSM2 || meiotic chromosome segregation* || molecular function unknown || YIL132C || 1082069	1	-0.83	-0.63	-0.43	0.17	0.04	0.24	0.18	0.26	-0.23	-0.13	0.16	-0.52
A_06_P3998	MRS1 || Group I intron splicing || RNA binding* || YIR021W || 1082070	1	-0.34	0.34	-0.56	-0.9	-1.08	-1.12	0.02	0.4	-0.71	-0.86	-0.68	-0.67
A_06_P5889	DCP2 || mRNA catabolism* || mRNA binding* || YNL118C || 1082071	1	0.01	0.16	0.62	0.94	0.3	0.23	-0.05	0.15	0.18	0.43	0.29	-0.58
A_06_P3660	IPI1 || rRNA processing* || molecular function unknown || YHR085W || 1082072	1	-4.48	-3.79	-4.31	-3.17	-2.56	-2.24	-0.65	-1.69	-4.67	-4.45	-2.46	-1.5
A_06_P6062	RFC3 || mismatch repair* || ATPase activity* || YNL290W || 1082073	1	-0.95	-0.86	-1.71	-1.42	-2.22	-1.2	-0.17	0.41	-0.14	-0.16	-0.33	-0.86
A_06_P1756	MPS1 || mitotic spindle checkpoint* || protein threonine/tyrosine kinase activity || YDL028C || 1082074	1	0.16	0.16	0.46	0.23	-0.47	-0.3	0.21	-0.03	-0.17	0.17	-0.07	-0.31
A_06_P4465	OAR1 || aerobic respiration* || 3-oxoacyl-[acyl-carrier protein] reductase activity || YKL055C || 1082075	1		-0.82	0.12	-2.47	-0.67	-0.44	0.8		-2.93	-2.3	-2.19	-2.16
A_06_P1476	TDP1 || DNA repair || tyrosyl-DNA phosophodiesterase activity || YBR223C || 1082076	1	1.42	1.39	2.04	0.61	0.36	1.07	0.6	-1.04	0.39	0.48	-0.21	0.25
A_06_P2787	OXA1 || mitochondrial inner membrane protein import || protein transporter activity || YER154W || 1082077	1	-0.33	0.34	0.43	-0.8	-0.67	-0.79	0	-0.78	-0.6	-0.42	-0.56	-0.94
A_06_P5754	GLC8 || glycogen biosynthesis || enzyme activator activity || YMR311C || 1082078	1	2.14	1.88	2.99	2.78	2.02	2.3	0.4	0.88	1.05	1.06	1.06	1.14
A_06_P6972	PUS1 || tRNA modification || tRNA-pseudouridine synthase activity || YPL212C || 1082079	1	-3.82	-2.89	-3.8	-3.37	-3.28	-3.38	-0.37	-1.2	-4.06	-3.95	-2.28	-1.41
A_06_P1394	MAK5 || rRNA processing* || ATP-dependent RNA helicase activity || YBR142W || 1082080	1	-2.61	-3.92	-4.86	-3.3	-3.02	-2.78	-0.55	-1.79	-5.75	-5.72	-3.59	-2.58
A_06_P2777	UBP5 || protein deubiquitination || ubiquitin-specific protease activity || YER144C || 1082081	1	0.54	0.48	0.97	1.66	2.32	2.09	-0.14	0.6	0.28	0.42	1.03	1.16
A_06_P5939	SKO1 || negative regulation of transcription from RNA polymerase II promoter || RNA polymerase II transcription factor activity || YNL167C || 1082082	1	1.12	0.85	1.43	0.49	1.03	0.47	0.29	-0.18	0.58	0.58	0.4	0.53
A_06_P6267	MDM20 || mitochondrion inheritance* || peptide alpha-N-acetyltransferase activity || YOL076W || 1082083	1	-1.87	-1.01	-1.45	-2.87	-1.63	-2.32	0.47	-1.68	-1.41	-1.05	-1.36	-1.23
A_06_P4005	DAL4 || allantoin transport || allantoin permease activity || YIR028W || 1082084	1	-0.45	-2.55	-3.9	-3.45	-2.58	-3.33	2.44	0.6	4.85	4.95	4.57	3.88
A_06_P3222	SWC4 || chromatin remodeling* || DNA binding || YGR002C || 1082085	1	0.11	0.12	0.67	0.37	-0.36	0.05	-0.21	-0.36	-0.22	-0.11	-0.18	-0.39
A_06_P6572	RPB10 || transcription from RNA polymerase II promoter* || DNA-directed RNA polymerase activity || YOR210W || 1082086	1	-1.84	-1.85	-3.16	-2.12	-1.66	-2.21	-0.36	0.48	-1.12	-1.13	-1.08	-1.05
A_06_P5083	SEC22 || ER to Golgi transport* || v-SNARE activity || YLR268W || 1082087	1	-0.02	-0.3	-0.52	-0.22	-0.94	-1.38	-0.2	0.66	0.74	0.63	0.08	-0.31
A_06_P5441	|| biological process unknown || molecular function unknown || YMR013W-A || 1082088	1	-0.05	-0.1	-0.32	0.8	1.46	1.66	-0.68	0.74	0.56	0.35	-0.22	0.58
A_06_P5527	|| biological process unknown || molecular function unknown || YMR098C || 1082089	1	0.84	0.94	1.27	0.82	0.15	0.04	0.19	0.41	0.43	0.43	0.07	-0.08
A_06_P2045	TGL2 || lipid metabolism || triacylglycerol lipase activity || YDR058C || 1082090	1	1.38	1.53	1.84	0.96	1.29	0.92	0.33	0.21	1.43	1.48	1.18	1.5
A_06_P6404	CUE5 || biological process unknown || molecular function unknown || YOR042W || 1082091	1	1.46	1.83	2.52	1.74	1.6	1.26	0.6	0.11	0.78	0.81	0.61	0.76
A_06_P2600	SOM1 || proteolysis and peptidolysis || molecular function unknown || YEL059C-A || 1082092	1	0.5	0.79	0.88	0.68	0.65	0.75	0.02	0.13	1.07	1.16	0.49	0.97
A_06_P1317	TAT1 || amino acid transport || amino acid transporter activity || YBR069C || 1082093	1	-1.17	-1.71	-1.02	0.05			-0.42	-0.03			-0.8
A_06_P2426	|| || || YDR433W || 1082094	1	0.16	0.36	-0.91	-1.73	-0.77	-0.94	0.1	-0.48	-0.05	-0.46	-0.65	-0.14
A_06_P3041	MAD1 || mitotic spindle checkpoint* || molecular function unknown || YGL086W || 1082095	1	-0.16	-0.37	-0.15	0.26	0.4	-0.02	-0.18	0.6	-0.3	-0.04	-0.23	-0.2
A_06_P2329	|| biological process unknown || molecular function unknown || YDR338C || 1082096	1	0.48	0.32	1.25	1.31	0.87	1.07	-0.06	-0.26	0.18	0.39	0.51	0.6
A_06_P3003	RPT6 || ubiquitin-dependent protein catabolism || ATPase activity* || YGL048C || 1082097	1	0.59	0.95	0.93	0.96	0.19	0.65	0	0.71	1.01	0.87	0.52	-0.04
A_06_P5646	HFA1 || fatty acid biosynthesis || acetyl-CoA carboxylase activity || YMR207C || 1082098	1	-0.8	-0.61	-1.03	-0.15	0.24	0.08	-0.17	0.21	0.34	0.55	0.47	0.74
A_06_P3563	|| || || YHL045W || 1082099	1	0.11	0.4	1.09
A_06_P2967	ERG4 || ergosterol biosynthesis || delta24(24-1) sterol reductase activity || YGL012W || 1082100	1	-0.07	-0.72	-2.61	-3.04	-3.67	-3.86	-0.05	-0.16	-0.91	-1.23	-0.93	-0.68
A_06_P1767	PRM7 || conjugation with cellular fusion || molecular function unknown || YDL039C || 1082101	1		-0.22	-0.28				0.14		-0.51	0.01	-0.02
A_06_P2213	HTB1 || chromatin assembly or disassembly* || DNA binding || YDR224C || 1082102	1	1.24	-0.1	-0.46	-0.76	-0.64	-0.04	0.21	1.1	0.17	0.23	0.13	0.2
A_06_P1442	RPS9B || protein biosynthesis* || structural constituent of ribosome || YBR189W || 1082103	1	-1.89	-2.39	-4.8	-4.83	-5.21	-3.01	0.03	-0.33	-3.9	-5.07	-3.56	-2.73
A_06_P2117	SAC6 || endocytosis* || protein binding, bridging* || YDR129C || 1082104	1	1.03	1.73	1.01	0.22	-0.44	-0.57	0.3	-0.09	0.73	0.6	0.14	-0.2
A_06_P6425	RPL3 || protein biosynthesis* || structural constituent of ribosome || YOR063W || 1082105	1	0.43	-1.2	-4.19	-4.39	-3.64	-1.27	0	-0.11	-1.9	-4.21	-3.36	-2.18
A_06_P3432	ZPR1 || regulation of progression through cell cycle || protein binding || YGR211W || 1082106	1	-3.47	-1.89	-2.44	-2.39	-2.7	-1.74	-0.42	-2.37	-4.85	-4.62	-2.31	-1.97
A_06_P5599	MSS11 || pseudohyphal growth* || specific RNA polymerase II transcription factor activity || YMR164C || 1082107	1	0.52	0.32	1.03	2	2.01	1.62	-0.06	0.66	0.54	0.57	0.49	0.71
A_06_P3177	EDC1 || deadenylylation-dependent decapping || mRNA binding || YGL222C || 1082109	1			2.02			-0.04		-1.13	-0.45		-0.35	-0.4
A_06_P4728	PXL1 || maintenance of cell polarity (sensu Fungi) || protein binding || YKR090W || 1082110	1	0.29	-0.22	-0.55	-1.35	-1.61	-1.48	-0.2	0.19	-0.2	-0.04	-0.11	-0.26
A_06_P3615	DOG2 || response to stress* || 2-deoxyglucose-6-phosphatase activity || YHR043C || 1082112	1	1.94	2.1	0.22	-1.11			0.59	0.4	1.66	1.1	0	-0.85
A_06_P4371	|| || || YJR128W || 1082113	1			-0.71
A_06_P6375	|| || || YOR013W || 1082114	1	-0.89	-0.9		-1.01		-1.2	-0.6	-0.02	0.27	0.1	0.3	-0.05
A_06_P5087	YCS4 || mitotic sister chromatid segregation* || molecular function unknown || YLR272C || 1082115	1	-0.75	-1.11	-1.51	-1.32	-1.91	-1.63	0.07	-0.19	-0.78	-0.33	-0.21	-0.44
A_06_P1076	OAF1 || peroxisome organization and biogenesis* || DNA binding* || YAL051W || 1082116	1	0.25	0.44	0.74	0.72	0.4	0.71	-0.18	-0.36	0.43	0.53	0.57	0.61
A_06_P2613	DLD3 || lactate metabolism || D-lactate dehydrogenase (cytochrome) activity || YEL071W || 1082117	1	-3.17	-3.34	0	0.48	0.48	-0.82	-0.6	0.78	-3.32	-4.04	-3.46	-3.45
A_06_P3650	PTC7 || biological process unknown || protein phosphatase type 2C activity || YHR076W || 1082118	1	0.41	0.4	0.17	-0.04	-0.23	-0.79	0.26	0.7	0.77	0.8	0.01	-0.43
A_06_P1939	RTN2 || biological process unknown || molecular function unknown || YDL204W || 1082119	1	5.96	6.73	6.85	4.37	6.58	5.99	0.59	0.67	4.42	3.99	3.76	5.04
A_06_P2028	RSM10 || protein biosynthesis || structural constituent of ribosome || YDR041W || 1082120	1	1.1	1.48	1.59	1.72	1.02	0.3	-0.07	1.26	1.14	1.05	0.68	1.38
A_06_P3925	STH1 || meiosis* || ATPase activity* || YIL126W || 1082121	1	-0.53	-0.5	-0.28	-1.51	-2.34	-0.62	0.23	-1.75	-0.76	-0.31	-0.75	-0.71
A_06_P5182	|| biological process unknown || molecular function unknown || YLR364W || 1082122	1	-0.73	-0.08	-1.54	-0.95	-0.56	-0.57	0.17	0.49	-0.4	-0.36	-1.03	-1.34
A_06_P6149	|| protein biosynthesis || structural constituent of ribosome || YNR036C || 1082123	1	1.6	2.39	2.01	1.91	1.52	1.52	0.1	0.84	0.29	0.17	0.39	0.62
A_06_P3816	SNL1 || protein folding* || chaperone regulator activity || YIL016W || 1082124	1	-0.51	-0.97	-1.83	-1.14	-0.66	-1.51	-0.05	0.9	0.21	0.01	-0.11	0.39
A_06_P5904	FYV6 || double-strand break repair via nonhomologous end-joining || molecular function unknown || YNL133C || 1082125	1	0.65	0.32	1.32	1.65	1.43	1.22	0.19	0.54	0.19	0.31	0.16	0.31
A_06_P5454	PEX12 || peroxisome organization and biogenesis* || protein binding || YMR026C || 1082126	1	-0.16	-0.37	0.34	0.77	1.09	0.46	0.15	-0.32	-0.04	0.04	0.14	0.24
A_06_P2005	|| biological process unknown || molecular function unknown || YDR020C || 1082127	1	-2.37	-2.32	-3.06	-3.5		-3.4	-0.7	-2.07	-2.53	-2.44	-2.25	-2.94
A_06_P6163	LYS9 || lysine biosynthesis via aminoadipic acid || saccharopine dehydrogenase (NADP+, L-glutamate-forming) activity || YNR050C || 1082128	1	-0.52	-1.38	-4.72	-4.28	-5.04	-4.05	0.04	0	0.44	-0.32	-1.12	-1.13
A_06_P5820	SFB2 || ER to Golgi transport || molecular function unknown || YNL049C || 1082129	1	-0.8	-0.96	-1	-0.67	-0.5	-0.78	-0.23	-0.44	-0.91	-0.74	-0.55	-0.53
A_06_P4540	PMU1 || biological process unknown || molecular function unknown || YKL128C || 1082130	1	-1.49	-1.69	-2.55	-3.03	-3.31	-3.85	-0.16	0	-0.95	-1.21	-1.69	-2.43
A_06_P6012	NAR1 || iron-sulfur cluster assembly || iron hydrogenase activity || YNL240C || 1082131	1	-1.34	-1.07	0.33	0.38	0.48	1.01	-0.23	-2.49	-1.95	-1.57	-1.03	-0.33
A_06_P6634	TPO4 || polyamine transport || spermine transporter activity* || YOR273C || 1082132	1	4.42	3.46	3.39	3.38	3.98	3.72	1.89	2.09	3.54	3.81	4.21	4.64
A_06_P4599	MTR2 || poly(A)+ mRNA-nucleus export || protein binding || YKL186C || 1082133	1	-0.84	-0.98	-0.97	-0.2	0.13	-0.1	-0.54	0.22	-0.88	-0.91	-0.84	-0.49
A_06_P3486	|| || || YGR265W || 1082134	1						-0.94		-0.68
A_06_P4042	BBC1 || actin cytoskeleton organization and biogenesis || myosin I binding || YJL020C || 1082135	1			1.77	-0.53		-0.79	0.36		-0.83	-0.23	-0.7
A_06_P4866	OSW2 || spore wall assembly (sensu Fungi) || molecular function unknown || YLR054C || 1082136	1	0.54	0.67	0.47				0.4					1.44
A_06_P1466	MET8 || sulfate assimilation* || ferrochelatase activity* || YBR213W || 1082137	1	-2.15	-1.28	-1.55	-3.16	-2.75	-2.14	-0.09	-2.04	-3.11	-3.37	-3.12	-2.55
A_06_P5477	ERB1 || rRNA processing || molecular function unknown || YMR049C || 1082139	1	-3.55	-4.39	-5.07	-5.05	-5.21	-3.61	-0.21	-2.16	-5.69	-5.94	-3.67	-2.81
A_06_P5600	SMP2 || aerobic respiration* || molecular function unknown || YMR165C || 1082140	1	1.42	1.08	2.39	2.58	2.89	2.23	0.03	0.08	0.89	1.02	1.2	1.22
A_06_P4045	APS3 || vesicle-mediated transport* || molecular function unknown || YJL024C || 1082141	1	-0.2	0.01	-0.23	0.12	0.19	0.36	0.26	-0.11	0.55	0.52	0.47	-0.27
A_06_P3176	NIF3 || biological process unknown || molecular function unknown || YGL221C || 1082142	1	-0.05	0.04	0.01	-0.25	-0.58	-0.3	-0.09	-0.2	-0.39	-0.32	-0.48	-0.57
A_06_P5448	FMS1 || pantothenate biosynthesis* || amine oxidase activity || YMR020W || 1082144	1	0.73	0.75	1.56	1.44	0.69	1.24	0.14	0.11	0.68	0.63	0.46	0.51
A_06_P2772	|| biological process unknown || molecular function unknown || YER139C || 1082145	1	0.67	0.42	1.18	1.81	1.18	1.18	0.09	0.08	0.73	0.78	0.41	-0.29
A_06_P4733	MLP1 || mRNA-nucleus export* || ribonucleoprotein binding || YKR095W || 1082146	1	-0.12	-0.16	0.01	0.03	0.43	0.35	-0.18	-0.03	-0.54	-0.28	-0.28	0.16
A_06_P3463	|| || || YGR242W || 1082147	1								0.56
A_06_P5787	PUB1 || mRNA catabolism, nonsense-mediated decay || nucleic acid binding || YNL016W || 1082148	1	-0.88	-0.53	-1.48	-2.62	-3.01	-2.47	0.08	-1.07	-1.16	-1.2	-1.08	-1.89
A_06_P2705	RPS24A || protein biosynthesis || structural constituent of ribosome || YER074W || 1082150	1	-0.82	-1.56	-5.34	-4.66	-4.04	-1.9	0.27	0.98	-2.71	-4.26	-3.1	-1.07
A_06_P4551	CTK1 || protein amino acid phosphorylation* || protein kinase activity* || YKL139W || 1082151	1	-0.91	-0.53	-0.48	-0.21	-0.33	-0.16	-0.51	-0.3	-1.28	-1.2	-0.95	-1.38
A_06_P6301	INO4 || positive regulation of transcription from RNA polymerase II promoter* || DNA binding* || YOL108C || 1082152	1	0.67	0.45	0.99	0.31	0.45	0.28	0.64	0.39	1.31	1.35	0.97	0.96
A_06_P6481	RIO1 || processing of 20S pre-rRNA* || protein kinase activity || YOR119C || 1082153	1	-1.75	-1.53	-0.57	0.42	0.88	0.65	-0.73	-1.14	-2.49	-2.57	-1.04	-0.17
A_06_P4537	RRN3 || transcription from RNA polymerase I promoter || RNA polymerase I transcription factor activity || YKL125W || 1082155	1	-1.8	-0.98	-0.63	-0.17	-0.23	-0.16	-0.39	-1.26	-1.55	-1.22	-0.58	-0.11
A_06_P2616	|| || || YEL074W || 1082156	1	0.13	0.18	0.23	0.2	0.46	0.83	0.05	-0.3	0.09	0.17	0.15	0.26
A_06_P1342	MRS5 || mitochondrial inner membrane protein import || protein transporter activity || YBR091C || 1082157	1	-0.43	-0.19	-0.6	0.2	-0.32	-1.38	-0.76	1.21	-0.48	-0.78	-0.73	-0.52
A_06_P5836	SUN4 || mitochondrion organization and biogenesis || glucosidase activity || YNL066W || 1082158	1	-0.21	-0.07	-0.43	-2.44	-3.74	-2.92	0.09	-2.42	-1.12	-0.92	-1.38	-2.05
A_06_P4932	SRN2 || protein-vacuolar targeting* || molecular function unknown || YLR119W || 1082159	1	0.27	0.47	0.59	0.53	1.34	0.8	1	0.5	1.43	1.52	0.77	0.73
A_06_P3731	SPO16 || sporulation (sensu Fungi) || molecular function unknown || YHR153C || 1082160	1	-1.01	-2.23					-0.03	0.84	0.45	-0.01	-0.1	-0.2
A_06_P4981	RPS31 || protein biosynthesis* || structural constituent of ribosome* || YLR167W || 1082161	1	0.52	-1.06	-4.99	-4.09	-2.86	-1.08	-0.14	0.88	-1.92	-4.22	-3.21	-0.62
A_06_P2294	HNT2 || nucleoside catabolism || hydrolase activity* || YDR305C || 1082162	1	0.62	0.4	1	1.48	2.39	1.72	-0.16	1.3	1.5	1.4	1.09	1.73
A_06_P3105	INO80 || DNA repair* || ATPase activity || YGL150C || 1082163	1	-0.21	0.16	-0.15	0.06	-0.19	0.55	0.04	-0.26	-0.14	-0.2	-0.13	-0.01
A_06_P4362	|| biological process unknown || molecular function unknown || YJR119C || 1082165	1	0.14	0.83	0.68	2.2	2.38	2	-0.17	1.27	0.51	0.67	1.35	1.84
A_06_P2432	LRS4 || chromatin silencing at ribosomal DNA* || molecular function unknown || YDR439W || 1082166	1	-0.26	0	0.73	0.73	0.21	0.56	0.06	0.04	0.33	0.4	-0.04	-0.83
A_06_P5327	|| biological process unknown || molecular function unknown || YML037C || 1082167	1		-1.38	-1.52				-0.07	-0.76			0.3	0.16
A_06_P6783	RMI1 || response to DNA damage stimulus || molecular function unknown || YPL024W || 1082168	1	-0.14	-0.05	0.08	0.55	-0.11	0.91	-0.17	-0.14	0.59	0.66	0.7	1.02
A_06_P3671	HXT5 || hexose transport || glucose transporter activity* || YHR096C || 1082169	1	5.83	6.55	9.14	6.5	6.64	6.64	-0.03	2.97	5.37	5.57	5.24	6.64
A_06_P3273	|| biological process unknown || molecular function unknown || YGR053C || 1082170	1	2.9	3.14	4.33	4.11	5.09	4.27	0.64	2.11	2.48	2.33	2.58	3.4
A_06_P3588	ARG4 || arginine biosynthesis || argininosuccinate lyase activity || YHR018C || 1082171	1	-1.2	-1.63	-2.37	-1.83	-1.86	-2.55	0.2	0.72	0.56	0.11	-0.23	-0.74
A_06_P2976	ALK1 || mitosis || protein serine/threonine kinase activity || YGL021W || 1082172	1	0.08	0.11	-1.04	-1.18	-0.12	-0.92	0.35	0.55	1.5	2.05	1.32	0.93
A_06_P7238	RPC82 || transcription from RNA polymerase III promoter || DNA-directed RNA polymerase activity || YPR190C || 1082173	1	-2.84	-2.3	-2.77	-2.99	-2.83	-2.2	-0.69	-2.02	-4.08	-3.86	-2.47	-2.27
A_06_P4304	|| biological process unknown || molecular function unknown || YJR061W || 1082174	1	0.32	0.67	1.26	2.02	2.61	2.71	-0.2	0.81	0.88	1.01	1.16	1.96
A_06_P3047	NUP145 || mRNA-nucleus export* || structural molecule activity || YGL092W || 1082175	1	-0.19	-0.52	-0.65	-1.14	-0.16	-1.06	-0.29	-0.64	-1.17	-0.88	-0.93	-0.1
A_06_P6813	LEE1 || biological process unknown || molecular function unknown || YPL054W || 1082176	1		3.18	4.72	3.5					3.68	3.73	2.53
A_06_P4810	|| || || YLL065W || 1082177	1		-0.88									-0.62
A_06_P4302	PTK2 || G1/S transition of mitotic cell cycle* || protein kinase activity || YJR059W || 1082178	1	1.98	1.9	2.41	1.17	1.53	1.55	0.79	0.27	1.5	1.66	1.25	0.91
A_06_P3476	COQ6 || ubiquinone metabolism || ubiquinone biosynthesis monooxygenase activity || YGR255C || 1082179	1	1.34	1.36	0.89	1.34	1.56	1.1	-0.02	1.21	2.18	2.06	1.88	1.53
A_06_P1851	YFH1 || iron ion homeostasis* || enzyme regulator activity || YDL120W || 1082180	1	0.24	0.52	0.6	0.55	-0.68	-0.44	-0.06	0.07	-0.47	-0.62	-0.61	-1.12
A_06_P2108	TRM1 || tRNA methylation || tRNA (guanine-N2-)-methyltransferase activity || YDR120C || 1082181	1	-3.46	-3.81	-4.24	-3.1	-3.38	-2.13	-0.6	-2.05	-5.25	-5.03	-2.75	-2.94
A_06_P7184	|| || || YPR136C || 1082182	1	0.78	-0.11	-0.6					-0.78			-1.2
A_06_P3028	HSF1 || regulation of transcription from RNA polymerase II promoter* || transcription factor activity || YGL073W || 1082183	1	0.54	1.01	1.42	0.69	1.06	1.25	0.27	-0.34	0.54	0.62	0.54	0.56
A_06_P2133	TAF12 || transcription initiation from RNA polymerase II promoter* || general RNA polymerase II transcription factor activity || YDR145W || 1082184	1	-0.23	-0.26	0.34	0.27	0.05	0.3	-0.19	-0.69	-0.71	-0.73	-0.72	-1.27
A_06_P3695	MSH1 || DNA repair || ATP binding || YHR120W || 1082185	1	-1.83	-1.67	-1.41	-0.92	-0.8	-0.86	-0.6	-1.16	-1.75	-1.63	-1.05	-0.88
A_06_P4592	COY1 || Golgi vesicle transport || molecular function unknown || YKL179C || 1082186	1	0.07	0.23	0.33	-0.28	0.01	-0.01	0.44	-0.27	-0.34	-0.2	-0.51	-1.12
A_06_P5537	ILV2 || branched chain family amino acid biosynthesis || acetolactate synthase activity* || YMR108W || 1082187	1	-0.72	-1.34	-3.55	-3.21	-3.2	-2.62	-0.28	-0.94	-2.1	-2.11	-1.71	-1
A_06_P2617	|| biological process unknown || molecular function unknown || YEL075C || 1082188	1		-0.22	-0.63	-0.58		-0.24	0.58	0.1	0.36	0.35	0.06	0.57
A_06_P4232	PEX2 || peroxisome organization and biogenesis || protein binding || YJL210W || 1082189	1	0.28	0.28	1.42	0.62	-0.34	0.33	0.03	-0.9	-1.35	-1.19	-0.93	-0.98
A_06_P7253	SBH1 || SRP-dependent cotranslational protein-membrane targeting, translocation* || protein transporter activity* || YER087C-B || 1082190	1	-0.27	-0.99	-1.49	-1.44	-1.5	-1.51	0.08	0.33	-0.62	-0.49	-0.5	-0.13
A_06_P5609	DDR48 || DNA repair || ATPase activity* || YMR173W || 1082191	1	2.15	2.77	0.95	0.71	0.36	0.07	0.8	0.97	2.1	1.76	1.79	1.64
A_06_P6177	|| response to toxin || epoxide hydrolase activity || YNR064C || 1082192	1	0.04	0.38	1.41	2.47	1.64	1.91	-0.47	0.62	1.09	0.29	-0.41	-0.88
A_06_P1703	TUP1 || negative regulation of transcription* || general transcriptional repressor activity || YCR084C || 1082193	1	-0.28	-0.27	-0.65	-1.35	-2.35	-1.3	0.05	-0.88	-0.37	0.01	-0.42	-1.08
A_06_P5465	MIH1 || G2/M transition of mitotic cell cycle* || protein tyrosine phosphatase activity || YMR036C || 1082194	1	0.22	0.09	1.02	1.17	2.03	2.6	0.03	-0.93	0.44	0.76	0.34	0.21
A_06_P2887	|| biological process unknown || molecular function unknown || YFL061W || 1082195	1	-0.01	0.51	-0.44		2.9	2.13	-0.15	0.49
A_06_P2890	|| biological process unknown || molecular function unknown || YFL064C || 1082196	1	-0.36	-0.32	-0.65	-0.97	0	-0.02	0.42	-0.19	0.67	0.78	0.28	1.72
A_06_P4723	MRPL20 || protein biosynthesis* || structural constituent of ribosome || YKR085C || 1082197	1	0.07	0.87	0.32	0.12	-0.46	-0.92	0.07	0.85	-0.75	-0.9	-0.93	-1.15
A_06_P6762	ULA1 || protein neddylation || NEDD8 activating enzyme activity || YPL003W || 1082198	1	2.69	2.41	2.89	2.1	1.82	1.81	0.69	1.17	2.48	2.41	1.69	1.99
A_06_P6646	|| biological process unknown || molecular function unknown || YOR285W || 1082199	1	2.15	3.25	2.53	3.55	3.91	4.14	0.3	1.97	2.1	2.1	2.29	2.83
A_06_P1923	PPH22 || protein biosynthesis* || protein phosphatase type 2A activity || YDL188C || 1082200	1	0.29	0.79	0.51	-0.16	0.43	0.26	0.44	-0.61	-0.11	-0.14	0.05	0.01
A_06_P2048	|| biological process unknown || ATPase activity, coupled to transmembrane movement of substances || YDR061W || 1082201	1	0.56	0.71	0.85	0.47	0.07	-0.34	0.04	0.53	0.56	0.72	0.6	0.6
A_06_P6006	|| response to stress || heme binding || YNL234W || 1082202	1	0.37	-1.11	-0.78	-0.84	-1.25	-1.42	0.44	-0.6	0	-0.02	1.02	0.75
A_06_P3597	PPA1 || vacuolar acidification || hydrogen-transporting ATPase activity, rotational mechanism || YHR026W || 1082203	1	-0.17	-0.3	-1.75	-1.25	-1.27	-1.11	-0.68	0.2	0.26	-0.11	-0.27	-0.13
A_06_P3449	|| || || YGR228W || 1082204	1	0.53		-0.32				0.46	-0.01			-0.64	-0.71
A_06_P5154	VRP1 || endocytosis* || actin binding || YLR337C || 1082205	1	1.47	1.31	1.52	1.93	2.16	1.44	-0.05	1.65	1.49	1.13	1	1.1
A_06_P6226	|| || || YOL035C || 1082206	1				0.1				-0.21			-0.64	-0.49
A_06_P4251	APL1 || vesicle-mediated transport || molecular function unknown || YJR005W || 1082207	1	0.55	0.23	0.38	0.63	0.42	0.72	-0.03	0.01	0.16	0.08	0.35	0.07
A_06_P4066	|| biological process unknown || molecular function unknown || YJL046W || 1082208	1	0.19	0.41	0.49	0.98	0.78	-0.24	-0.14	0.81	0.52	0.27	0.13	-0.04
A_06_P3212	ADH4 || fermentation || alcohol dehydrogenase activity, zinc-dependent || YGL256W || 1082209	1	-0.93	-1.38	-1.18	-1.13	-1.65	-1.43	-0.41	-0.71	-1.39	-1.33	-1.45	-1.3
A_06_P3627	|| biological process unknown || molecular function unknown || YHR054C || 1082210	1	0.37	0.22	0.42	1.53	2.33	2.31	-0.1	0.76	0.89	0.67	0.89	1.23
A_06_P3857	|| biological process unknown || molecular function unknown || YIL057C || 1082211	1			7.7	5.77	6.64	6.64
A_06_P3239	UGA1 || nitrogen utilization || 4-aminobutyrate transaminase activity || YGR019W || 1082213	1	1.96	2.44	2.6	1.71	1.6	1.37	0.67	0.82	2.71	2.61	2.26	2.51
A_06_P2197	MSS4 || sporulation (sensu Fungi)* || 1-phosphatidylinositol-4-phosphate 5-kinase activity || YDR208W || 1082214	1	0.47	0.13	1.04	1.24	1.54	1.16	-0.25	-0.26	0.21	0.58	0.38	0.65
A_06_P1068	|| || || YAL042C-A || 1082215	1	0.53		0.37				0.29
A_06_P3916	PRM5 || conjugation with cellular fusion || molecular function unknown || YIL117C || 1082216	1	1	0.22	-0.03	-0.96	-1.56	-0.85	-0.52	0.36	-1.38	-1.19	-0.72	0.25
A_06_P3491	YTA7 || protein catabolism || ATPase activity || YGR270W || 1082217	1	0.72	0.4	0.96	0.86	1.15	0.91	0.07	0.4	0.16	0.29	0.41	0.57
A_06_P4621	STE6 || peptide pheromone export || ATPase activity, coupled to transmembrane movement of substances || YKL209C || 1082218	1	-0.25	-0.33	-0.93	-1.52	-1.58	-2.29	-0.13	0.1	-0.04	0.18	-0.38	-0.9
A_06_P7178	NAT3 || mitochondrion inheritance* || peptide alpha-N-acetyltransferase activity || YPR131C || 1082219	1	0.1	0.14	-0.28	-0.45	-2	-1.55	-0.12	-0.1	-0.34	-0.28	-0.84	-1.22
A_06_P2166	SDH4 || tricarboxylic acid cycle* || succinate dehydrogenase (ubiquinone) activity || YDR178W || 1082220	1	3.04	3.25	4.36	4.32	4.33	2.85	-0.06	1.11	2.33	2.08	2.25	2.06
A_06_P4201	PFD1 || protein folding* || unfolded protein binding || YJL179W || 1082221	1	-0.64	-0.7	-1.7	-1.37	-0.66	-1.35	-0.4	0.5	-0.46	-0.66	-0.6	-0.27
A_06_P4137	PHO86 || protein folding* || molecular function unknown || YJL117W || 1082222	1	-0.29	-0.37	-0.24	-0.22	-0.15	0.22	0.03	-0.35	-0.55	-0.51	-0.46	-0.25
A_06_P6319	MDH2 || gluconeogenesis* || L-malate dehydrogenase activity || YOL126C || 1082223	1	3.76	3.61	6.06	4.91	6.29	5.28	1.34	2.12	3.98	4.02	3.56	4.54
A_06_P3071	CDC20 || mitotic sister chromatid segregation* || enzyme activator activity || YGL116W || 1082224	1	-0.23	-0.28	-0.93	-0.66	-1.47	-1	0.04	-0.21	0.12	0.3	-0.14	-0.52
A_06_P5216	SKI2 || mRNA catabolism* || RNA helicase activity* || YLR398C || 1082225	1	-0.63	-0.44	-0.41	-0.91	-0.97	-0.93	0.39	-0.43	-0.74	-0.69	-0.71	-0.65
A_06_P6061	PCL1 || cell cycle || cyclin-dependent protein kinase regulator activity || YNL289W || 1082226	1	-1.29	-0.91	-3.34	-3.89	-3.04	-3.06	0.03	1.02	0.76	0.99	1.64	1.61
A_06_P4691	YSR3 || sphingolipid biosynthesis || sphingosine-1-phosphate phosphatase activity || YKR053C || 1082227	1	-0.15	-0.02	-0.33	0.06	-0.34	-0.07	-0.24	-0.19	0.91	1.16	0.85	0.56
A_06_P4933	YPS1 || protein processing || aspartic-type endopeptidase activity || YLR120C || 1082228	1	0.98	1.43	1.87	0.76	0.14	0.91	0.05	-0.72	0.38	0.36	0.78	0.2
A_06_P4355	NNF1 || chromosome segregation || molecular function unknown || YJR112W || 1082229	1	-1.88	-1.95	-2.01	-0.68	-1.31	-1.51	-0.17	0.29	-0.95	-0.13	0.02	-0.04
A_06_P4479	|| biological process unknown || molecular function unknown || YKL069W || 1082230	1	0.6	0.39	-0.6	1.24	0.82	0.37	-0.14	1.92	1.49	1.49	1.04	0.89
A_06_P5633	RPL36A || protein biosynthesis || structural constituent of ribosome* || YMR194W || 1082231	1	-2.19	-2.06	-3.99	-4.25	-3.26	-2.36	0.05	-0.22	-3.18	-3.5	-2.71	-1.69
A_06_P2136	KGD2 || tricarboxylic acid cycle* || dihydrolipoyllysine-residue succinyltransferase activity || YDR148C || 1082232	1	2.12	3.27	3.13	2.55	1.95	1.11	0.12	0.98	1.29	1.1	1.23	0.95
A_06_P6246	|| RNA elongation from RNA polymerase II promoter || molecular function unknown || YOL054W || 1082234	1	-1.21	-1.23	-0.38	-0.12	-0.58	0.22	-0.11	-1.14	-1.43	-1.13	-0.52	0.24
A_06_P1470	ATG12 || protein-vacuolar targeting* || molecular function unknown || YBR217W || 1082235	1	0.4	-0.1	0.38	1.87	1.24	1.07	-0.42	0.55	0.25	0.2	0.31	0
A_06_P1996	SNQ2 || response to drug* || xenobiotic-transporting ATPase activity || YDR011W || 1082236	1	0.65	0.78	1.2	1.96	1.58	1.83	0.13	0.24	0.08	0.41	0.92	0.96
A_06_P4220	PHO90 || phosphate transport || phosphate transporter activity || YJL198W || 1082237	1	-1.01	-1.96	-2.63	-1.79	-2.06	-1.78	-0.17	-0.64	-2.87	-2.54	-1.43	-1.14
A_06_P3118	RAD54 || chromatin remodeling* || DNA-dependent ATPase activity* || YGL163C || 1082238	1	0.24	0.16	0.3	0.7	0.26	0.58	-0.08	1	0.78	0.91	0.84	0.89
A_06_P4141	RPE1 || pentose-phosphate shunt || ribulose-phosphate 3-epimerase activity || YJL121C || 1082239	1	-0.94	-1.07	-1.61	-0.9	-0.07	-0.38	-0.32	-0.08	-0.59	-0.51	-0.32	0.21
A_06_P4399	AAD10 || aldehyde metabolism || aryl-alcohol dehydrogenase activity || YJR155W || 1082240	1	-0.7	-0.3	1.31	2.1	1.9	2.73	-0.02	-0.05	-0.23	0.45	1.7	2.69
A_06_P5678	RNT1 || 35S primary transcript processing || ribonuclease III activity || YMR239C || 1082241	1	-3.89	-3.88	-4.5	-3.86	-3.72	-2.98	-0.79	-1.87	-5	-4.96	-3.17	-2.1
A_06_P4035	MAD3 || mitotic spindle checkpoint || molecular function unknown || YJL013C || 1082242	1	0.77	0.68	0.83	-0.34	-0.31	-0.69	0.52	-0.57	-0.11	0.34	0.04	-0.2
A_06_P4648	|| biological process unknown || molecular function unknown || YKR011C || 1082243	1	2.69	2.4	2.43	2.49	2.45	2.21	0.78	2.17	2.47	2.2	1.97	2.21
A_06_P5241	ATG17 || autophagy || kinase activator activity || YLR423C || 1082244	1	1.31	1.24	1.96	2.03	2.74	2.07	0.39	0.88	1.66	1.79	1.61	1.98
A_06_P6414	|| biological process unknown || molecular function unknown || YOR052C || 1082245	1	3.59	3.37	3.38	1.92	2.84	1.91	1.01	0.67	2.85	2.79	2.48	2.69
A_06_P4296	BFA1 || conjugation with cellular fusion* || GTPase activator activity || YJR053W || 1082246	1		-0.6	-0.7						-0.28		0.37	0.81
A_06_P4408	DID4 || protein retention in Golgi* || protein binding || YKL002W || 1082247	1	0.59	0.86	1.04	1.76	0.98	1.05	-0.05	0.63	1.15	1.02	0.68	0.5
A_06_P5631	MRPL24 || protein biosynthesis || structural constituent of ribosome || YMR193W || 1082248	1	0.47	1.14	1.45	1.39	0.64	0.44	-0.36	0.82	-0.42	-0.53	-0.52	-0.59
A_06_P2541	WBP1 || protein amino acid N-linked glycosylation* || dolichyl-diphosphooligosaccharide-protein glycotransferase activity || YEL002C || 1082249	1	-0.45	-0.44	-1.02	-0.47	-0.72	-0.94	-0.01	0.54	-0.28	-0.36	-0.74	-0.97
A_06_P1143	RRN6 || transcription from RNA polymerase I promoter || RNA polymerase I transcription factor activity || YBL014C || 1082250	1	-1.56	-1.49	-1.27	-1.1	-1.62	-1.36	-0.4	-1.28	-1.62	-1.55	-1.32	-1.51
A_06_P3912	SDP1 || MAPKKK cascade during cell wall biogenesis || MAP kinase phosphatase activity || YIL113W || 1082251	1	5.29	4.87	5	5.02			0.82			4.15	4.12	4.25
A_06_P2128	|| peptidyl-glutamine methylation || S-adenosylmethionine-dependent methyltransferase activity* || YDR140W || 1082252	1	-0.32	-1	-1.38	0.16	0.26	0	-0.47	0.76	0.63	0.61	0.58	0.74
A_06_P2569	|| || || YEL028W || 1082253	1	-0.08	-0.15	0.65	1.8	1.14	1.13	-0.24	0.9	0.28	0.23	0.3	0.24
A_06_P3966	SDL1 || biological process unknown* || molecular function unknown* || YIL167W || 1082254	1	-0.09	-0.12	-0.24	0.26	-0.3	0.19	0.23	-0.33	1.99	1.84	1.22	0.88
A_06_P1160	PET9 || aerobic respiration* || ATP:ADP antiporter activity || YBL030C || 1082255	1	1.4	2.83	1.72	1.57	0.85	-0.41	0.11	0.22	0.66	0	0.41	0.48
A_06_P3184	SHE10 || biological process unknown || molecular function unknown || YGL228W || 1082256	1	0.21	0.43	0.89	0.92	-0.24	0.36	0.22	-0.08	0.43	0.42	0.38	-0.23
A_06_P3732	RTT107 || double-strand break repair* || molecular function unknown || YHR154W || 1082258	1	-1.62	-2.66	-3.63	-3.47	-2.22	-1.9	-0.09	-0.42	-1.13	-1.01	-0.97	-1.09
A_06_P2712	SER3 || serine family amino acid biosynthesis || phosphoglycerate dehydrogenase activity || YER081W || 1082259	1	-0.38	-1.42	-2.78	-2.89	-2.54	-1.34	0.06	-0.38	-1.3	-1.71	-1.9	-2.47
A_06_P1573	|| || || YCL022C || 1082260	1	0.14	0.03									-1.24
A_06_P5041	ADY4 || sporulation || structural molecule activity || YLR227C || 1082261	1	-0.71	-0.22	0.38	0.94	0.33	0.36	-0.24	0.52	0.34		0.14	-0.13
A_06_P5361	TCB3 || biological process unknown || lipid binding || YML072C || 1082262	1	0.38	0.52	0.62	0.55	0.08	-0.24	0.32	0.49	0.4	0.52	0.27	-0.52
A_06_P2749	RPL23B || protein biosynthesis || structural constituent of ribosome || YER117W || 1082263	1	-1.68	-2.09	-4.22	-4.38	-3.74	-2.58	0.32	0.18	-2.96	-3.53	-2.96	-2.17
A_06_P2423	CYM1 || proteolysis and peptidolysis* || metalloendopeptidase activity || YDR430C || 1082264	1	0.99	1.89	1.67	1.15	1.48	1.3	0.56	0.24	1.17	1.08	0.54	0.55
A_06_P6011	LAP3 || response to antibiotic || transcription regulator activity* || YNL239W || 1082265	1	0.58	1.69	1.55	2.16	2.43	2.11	0.18	0.85	2.97	3.31	2.63	2.33
A_06_P6874	BEM3 || establishment of cell polarity (sensu Fungi)* || signal transducer activity* || YPL115C || 1082266	1	-0.19	-0.01	0.07	-0.76	-1.06	-0.6	0.29	-0.65	-0.01	0.14	-0.39	-0.31
A_06_P4453	|| || || YKL044W || 1082267	1		-1.18
A_06_P3574	GPA1 || signal transduction during conjugation with cellular fusion || GTPase activity || YHR005C || 1082268	1	-0.62	-0.33	-0.42	-1.12	-1.63	-1.74	0.2	0.02	0.01	0.22	-0.29	-0.51
A_06_P1194	KIP1 || microtubule nucleation* || structural constituent of cytoskeleton* || YBL063W || 1082269	1	0.22	0.06	-0.14	-0.55	-0.1	-0.86	0	0.12	0.84	0.92	0.55	0.2
A_06_P6445	WHI5 || G1/S transition of mitotic cell cycle* || transcriptional repressor activity || YOR083W || 1082270	1		-0.23					0.4		-0.62	-0.28	-0.54
A_06_P3322	|| biological process unknown || molecular function unknown || YGR102C || 1082272	1	0.26	0.59	1.08	1.79	1.65	2.1	-0.29	0.17	0.27	0.39	0.89	0.92
A_06_P7160	PIS1 || cell cycle* || CDP-diacylglycerol-inositol 3-phosphatidyltransferase activity || YPR113W || 1082273	1	0.38	0.09	-1.05	-2.63	-2.46	-2.05	0.16	-0.05	0.05	0.23	-0.21	-0.28
A_06_P1549	PCA1 || iron ion homeostasis* || ATPase activity, coupled to transmembrane movement of ions, phosphorylative mechanism || YBR295W || 1082274	1	0.59	0.32	0.98	0.62	1.18	1.72	0.07	-0.54	0.94	1.23	1.22	2.6
A_06_P5854	SAL1 || transport || transporter activity* || YNL083W || 1082275	1	0	0.31	0.65	0.08	-0.24	0.08	-0.13	-0.86	0.16	0.36	0.24	0.15
A_06_P4790	RPL8B || protein biosynthesis || structural constituent of ribosome || YLL045C || 1082276	1	-1.31	-2.23	-4.4	-4.09	-5.37	-2.57	-0.06	-0.51	-3.63	-5.16	-3.2	-2.56
A_06_P3343	|| biological process unknown || molecular function unknown || YGR122W || 1082277	1	1.47	0.88	1.35	1.3	0.32	0.46	0.31	0.29	1.12	1.18	0.84	0.58
A_06_P5744	ADH2 || fermentation* || alcohol dehydrogenase activity || YMR303C || 1082278	1	0.23	0.42	6.96	5.45	6.64	6.64	-0.31	0.49	-0.05	-0.14	0.59	0.67
A_06_P6516	|| biological process unknown || molecular function unknown || YOR154W || 1082280	1	-1.48	-1.14	-0.79	-0.28	-0.74	-0.88	-0.06	-1.39	-1.43	-1.23	-0.9	-1.03
A_06_P4406	|| || || YJR162C || 1082281	1								-0.23
A_06_P1353	EXO84 || exocytosis* || protein binding || YBR102C || 1082282	1	-0.23	-0.14	-0.02	0.28	0.33	0.31	-0.07	-0.38	-0.37	-0.31	-0.38	-0.11
A_06_P1695	SOL2 || tRNA-nucleus export* || molecular function unknown* || YCR073W-A || 1082283	1	1.03	1.25	1.52	0.75	0.28	0.59	0.25	-0.61	0.64	0.69	-0.06	-0.74
A_06_P3078	RPS2 || protein biosynthesis* || structural constituent of ribosome || YGL123W || 1082284	1	-0.06	-0.37	-3.96	-2.95	-3.37	-1.44	0.35	-0.53	-2.82	-4.62	-3.02	-2.03
A_06_P3521	LAG1 || replicative cell aging* || sphingosine N-acyltransferase activity || YHL003C || 1082286	1	-0.01	-0.14	-0.59	-0.41	-1.04	-1.06	0.04	0.29	0.37	0.14	-0.08	-0.88
A_06_P3423	PCT1 || phosphatidylcholine biosynthesis* || choline-phosphate cytidylyltransferase activity || YGR202C || 1082287	1	-0.26	0.09	0.37	0.16	-0.33	-0.35	-0.08	-0.25	-0.26	-0.18	-0.18	-0.38
A_06_P3661	NAM8 || nuclear mRNA splicing, via spliceosome* || RNA binding* || YHR086W || 1082288	1	0.71	0.72	0.99	0.57	-0.45	0.18	0.01	-0.18	0.51	0.56	0.57	-0.49
A_06_P1877	|| biological process unknown || molecular function unknown || YDL144C || 1082289	1	0.21	0.54	0.47	0.51	-0.02	0	-0.13	0.32	0.71	0.63	0.22	0.17
A_06_P1151	PIM1 || proteolysis and peptidolysis* || ATP-dependent peptidase activity || YBL022C || 1082290	1	0.78	1.35	1.04	0.57	1.48	0.95	0.17	0.48	0.3	0.26	0.23	0.66
A_06_P5143	|| biological process unknown || molecular function unknown || YLR326W || 1082291	1	0.55	0.24	1.24	1.25	0.44	0.86	0.03	0.76	0.38	0.36	0.53	0.81
A_06_P1616	HMLALPHA1 || regulation of transcription from RNA polymerase II promoter* || transcription coactivator activity || YCL066W || 1082292	1		0.76	1.13			0.53	0.28	1.28			0.49	0.79
A_06_P4890	BOS1 || ER to Golgi transport || v-SNARE activity || YLR078C || 1082293	1	-0.08	-0.34	-0.17	0.3	0.4	0.15	-0.24	0.61	0.05	-0.09	0.15	-0.18
A_06_P6201	PLB3 || phosphatidylserine catabolism* || lysophospholipase activity || YOL011W || 1082294	1	-0.56	-0.02	0.66	0.38	0.29	0.27	-0.11	0.34	0.14	0.13	0.23	0.08
A_06_P4140	|| || || YJL120W || 1082295	1	0.76		-0.64				0.08
A_06_P5062	RCK2 || protein amino acid phosphorylation* || protein serine/threonine kinase activity || YLR248W || 1082296	1	1.1	1.1	1.8	1.52	1.27	0.52	0.26	0.51	1.14	1.11	1.05	1.02
A_06_P3000	RIM8 || meiosis* || molecular function unknown || YGL045W || 1082297	1	-0.03	0.98	1.51	1.33	0.62	1.65	-0.3	-0.25	0.22	0.08	0.28	1.05
A_06_P5973	PSY2 || biological process unknown || molecular function unknown || YNL201C || 1082298	1	-0.58	-0.95	-0.42	-0.11	0.41	-0.35	-0.39	0.07	-0.55	-0.17	-0.02	0.4
A_06_P1520	SLM6 || || || YBR266C || 1082299	1	0.96		-0.66				0.04
A_06_P3439	CRM1 || mRNA-nucleus export* || protein carrier activity || YGR218W || 1082300	1	0.04	0.42	0.52	-0.52	-0.94	-0.19	0.55	-1.29	-0.52	-0.39	-0.52	-0.98
A_06_P4106	|| biological process unknown || cyclin binding || YJL084C || 1082301	1	0.3	0.38	1.21	1.56	1.56	1.44	0.03	-0.24	0.26	0.32	0.38	0.61
A_06_P6848	RLM1 || cell wall organization and biogenesis* || DNA binding* || YPL089C || 1082302	1	-0.24	0.11	-0.07	0.44	0.2	0.72	-0.98	0.42	-0.17	-0.21	0.01	0.57
A_06_P1277	|| phospholipid metabolism || molecular function unknown || YBR030W || 1082303	1	-1.86	-1.43	-2.24	-2.34	-2.44	-2.14	-0.25	-0.99	-2	-2	-1.26	-1.62
A_06_P4421	URB1 || rRNA processing* || molecular function unknown || YKL014C || 1082304	1	-2.46	-3.19	-4.57	-4.04	-3.82	-3.09	-0.15	-1.17	-4.89	-5.06	-3.37	-2.71
A_06_P4533	|| biological process unknown || molecular function unknown || YKL121W || 1082305	1	1.94	1.91	2.48	2.21	2.24	1.96	0.5	0.61	1.11	1.21	1.04	1.03
A_06_P1702	TRX3 || response to oxidative stress || thiol-disulfide exchange intermediate activity || YCR083W || 1082306	1	1.06	1.81	1.16	1.68	3.51	3.19	0.18	-0.13	1.25	1.13	2.01	2.98
A_06_P7003	SRP68 || protein-ER targeting* || signal sequence binding || YPL243W || 1082308	1	-1.02	-0.71	-0.92	-1.55	-0.56	-0.76	0	-1.1	-1.25	-1.23	-1.59	-1.73
A_06_P1632	ADP1 || transport || ATPase activity, coupled to transmembrane movement of substances || YCR011C || 1082309	1	1.59	1.27	2.25	2.29	2.42	1.6	0.43	0.49	1.53	1.54	1.52	1.7
A_06_P3767	PTH1 || protein biosynthesis || aminoacyl-tRNA hydrolase activity || YHR189W || 1082310	1
A_06_P6976	|| biological process unknown || molecular function unknown || YPL216W || 1082311	1	-0.6	-0.44	-0.31	0.27	1.01	0.71	0.35	-0.39	0.17	0.38	0.48	0.86
A_06_P3640	HTD2 || fatty acid biosynthesis || 3-hydroxyacyl-[acyl-carrier protein] dehydratase activity || YHR067W || 1082313	1	0.14	-0.1	-0.33	-0.05	-1.02	-0.85	-0.07	-0.07	1.15	0.98	0.52	0.36
A_06_P3413	TDH3 || glycolysis* || glyceraldehyde-3-phosphate dehydrogenase (phosphorylating) activity || YGR192C || 1082314	1	-0.62	-0.43	-1.92	-2.35	-2.08	-0.31	0.78	-0.92	-1.57	-1.76	-0.77	-0.39
A_06_P3101	|| biological process unknown || molecular function unknown || YGL146C || 1082315	1	2.69	2.97	4.61	3.41	3.33	3.4	0.36	0.57	0.93	1.22	1.34	1.53
A_06_P3108	PEX14 || protein-peroxisome targeting* || protein binding || YGL153W || 1082317	1	0.62	0.78	1.5	1.79	1.79	1.35	0.19	0.14	0.22	0.1	-0.02	-0.06
A_06_P3923	AYR1 || phosphatidic acid biosynthesis || acylglycerone-phosphate reductase activity || YIL124W || 1082318	1	1.42	2.1	2.14	2.39	2.25	2.52	0.67	1.29	2.21	2.2	1.73	1.34
A_06_P3225	TFG2 || transcription initiation from RNA polymerase II promoter || general RNA polymerase II transcription factor activity || YGR005C || 1082319	1	0.05	0.16	0.37	0.02	-0.66	-0.08	0.11	-0.22	-0.18	-0.21	-0.34	-0.63
A_06_P6156	MVD1 || ergosterol biosynthesis* || diphosphomevalonate decarboxylase activity || YNR043W || 1082320	1	-1.05	-1.04	-2.45	-2.59	-3.26	-3.68	0.1	-0.75	-0.94	-0.99	-0.97	-1.64
A_06_P6352	|| biological process unknown || molecular function unknown || YOL159C || 1082321	1	1.12	1.04	0.97	1.88	1.99	2.39	0.12	1.67	2.09	1.88	1.81	2.53
A_06_P6893	ODC1 || mitochondrial transport || intracellular transporter activity* || YPL134C || 1082322	1	1.99	2.67	4.46	3.7	3.39	2.01	0.6	0.13	2.55	2.57	1.87	1.76
A_06_P4814	NOC3 || rRNA processing* || protein binding* || YLR002C || 1082323	1	-3.06	-3.21	-4.44	-3.68	-3.22	-3.2	-0.55	-1.56	-4.57	-4.55	-3.27	-2.49
A_06_P2677	RSM18 || protein biosynthesis || structural constituent of ribosome || YER050C || 1082324	1	1.23	1.41	1.33	1.48	1.52	0.62	-0.03	1.83	0.96	0.97	0.48	0.47
A_06_P2578	RAD23 || ER-associated protein catabolism* || damaged DNA binding || YEL037C || 1082325	1	0.22	0.4	-0.29	-0.54	-0.3	0.25	0.13	-0.06	-0.3	-0.28	-0.41	-0.17
A_06_P1774	MRP10 || protein biosynthesis || structural constituent of ribosome || YDL045W-A || 1082326	1	-0.06	1.07	0.48	-0.31		-0.16	0.24	0.1	0.19	0.35	0.32	-0.15
A_06_P2135	EKI1 || phosphatidylethanolamine biosynthesis || choline kinase activity* || YDR147W || 1082327	1	-0.92	-0.94	-1.89	-1.25	-0.96	-1.34	-0.38	0.7	0.83	0.8	0.45	0.32
A_06_P6287	RFC4 || mismatch repair* || DNA clamp loader activity* || YOL094C || 1082328	1	-0.72	-0.78	-1.39	-0.77	-0.56	-0.74	-0.42	0.74	-0.13	-0.34	-0.39	-0.43
A_06_P2191	RAV2 || vacuolar acidification* || molecular function unknown || YDR202C || 1082329	1	1.5	1.44	2.22	2.83	2.78	2.31	0.21	1.17	1.82	1.61	1.65	0.98
A_06_P4837	SNF7 || late endosome to vacuole transport* || molecular function unknown || YLR025W || 1082330	1	1.07	0.85	1.64	1.38	1.47	1.43	0.25	0.55	1.21	1.13	0.87	1.02
A_06_P3116	YIP5 || vesicle-mediated transport || Rab GTPase binding || YGL161C || 1082331	1	1.13	0.96	1.16	0.9	0.4	-0.29	0.06	0.14	0.84	0.76	0.26	-0.05
A_06_P4025	SYS1 || Golgi to endosome transport* || molecular function unknown || YJL004C || 1082332	1	0.19	-0.18	0.04	0.08	0.82	0.46	0.14	-0.02	0.11	0.22	0.09	0.09
A_06_P3002	ALG13 || dolichol-linked oligosaccharide biosynthesis || transferase activity, transferring glycosyl groups* || YGL047W || 1082333	1	2.15	2.02	2.22	2.02	2.1	1.86	0.55	1.44	2.26	2.09	1.39	1.55
A_06_P3493	SLH1 || regulation of translation || RNA helicase activity || YGR271W || 1082334	1	0.02	0.22	0.47	0.72	1.05	0.49	0.04	0.2	0.15	0.22	0.16	0.28
A_06_P5274	|| biological process unknown || molecular function unknown || YLR455W || 1082335	1	-0.53	-0.2	-0.23	-1.43	-1.94	-1.19	0.29	-1.2	-0.39	0.15	-0.42	-1.27
A_06_P4801	|| biological process unknown || molecular function unknown || YLL056C || 1082336	1	0.78	0.89	2.35	2.14	1.76	2.12	0.21	-0.27	0.69	0.49	0.73	1.83
A_06_P5266	VMA6 || vacuolar acidification* || hydrogen-transporting ATPase activity, rotational mechanism || YLR447C || 1082337	1	-0.32	-0.1	-1.49	-1.7	-1.82	-0.92	0.05	-0.6	0.01	-0.17	-0.42	-0.45
A_06_P6278	ADH1 || fermentation || alcohol dehydrogenase activity || YOL086C || 1082338	1	1.28	1.21	-2.77	-1.34	-0.6	-0.11	-0.27	0.01	0.58	-0.77	0.11	0.38
A_06_P5666	TAF7 || transcription initiation from RNA polymerase II promoter* || general RNA polymerase II transcription factor activity || YMR227C || 1082339	1	-0.73	-0.29	-0.01	-0.41	-0.55	-0.05	0.02	-0.51	-0.7	-0.29	-0.17	0.19
A_06_P3707	ECM14 || cell wall organization and biogenesis* || metalloendopeptidase activity || YHR132C || 1082340	1	0.33	0.05	0.42	0.65	0.97	0.73	0.19	-0.01	0.21	0.25	0.13	0.15
A_06_P4634	|| biological process unknown || molecular function unknown || YKL222C || 1082341	1	0.3	0.29	0.89	0.8	0.53	0.93	0.07	-0.85	-0.17	-0.13	-0.2	-0.14
A_06_P5944	APC1 || mitotic sister chromatid segregation* || protein binding* || YNL172W || 1082342	1	0.29	0.31	0.54	0.95	0.9	0.23	0.32	0.7	1.01	1.1	0.97	0.91
A_06_P1459	|| || || YBR206W || 1082343	1	-0.19	-0.04	-0.4	-1.01	-0.96	-1.22	0.25	-0.23	-1.09	-0.88	-0.81	-1.02
A_06_P1246	|| biological process unknown || molecular function unknown || YBL112C || 1082344	1	0.36	-0.09	0.45	-0.58	2.06	1.42	-0.04	-0.42	0.83	1.06	1.2	2.6
A_06_P5288	|| biological process unknown || molecular function unknown || YML002W || 1082345	1	0.76	1.13	1.64	2	1.87	1.94	-0.14	0.15	0.93	0.73	1.13	1.38
A_06_P4223	ECM25 || cell wall organization and biogenesis* || molecular function unknown || YJL201W || 1082346	1	0.22	-0.13	-0.68	-0.91	-0.53	-0.61	0.33	0.8	0.57	0.56	0.24	-0.12
A_06_P3032	HNM1 || choline transport || choline transporter activity || YGL077C || 1082347	1	-1.09	-1.52	-2.85	-3	-1.98	-2.38	0.19	-0.04	0.63	0.32	0.14	0.1
A_06_P1779	|| || || YDL050C || 1082348	1	-1.28	-2	-2.12	-2.43		-1.2	-0.39	-1.13	-2.71	-2.53	-2.44	-2.2
A_06_P2620	|| || || YEL075W-A || 1082350	1	-0.13	-0.13	0.07	-0.32	-0.38	0.29	-0.24	-0.86	-0.26	-0.19	-0.44	-0.25
A_06_P7229	SEC23 || ER to Golgi transport* || GTPase activator activity || YPR181C || 1082351	1	-0.3	-0.09	-0.63	-1.06	-0.87	-0.58	0.1	-0.78	-0.66	-0.44	-0.43	-0.64
A_06_P1444	RPL21A || protein biosynthesis* || structural constituent of ribosome || YBR191W || 1082352	1	-1.55	-2.36	-4.63	-4.96	-4.34	-2.87	-0.2	0.36	-2.87	-4.16	-3.09	-1.92
A_06_P4154	MRS3 || RNA splicing* || iron ion transporter activity* || YJL133W || 1082354	1	0.07	-0.29	-0.28	-0.98	-0.95	-1.9	-0.06	0.08	-0.71	-0.77	-1.03	-1.09
A_06_P2810	PDA1 || pyruvate metabolism || pyruvate dehydrogenase (acetyl-transferring) activity || YER178W || 1082355	1	0.79	1.31	0.3	1.27	1.25	0.99	-0.15	0.72	0.28	-0.01	0.12	0.4
A_06_P4010	MGA2 || positive regulation of transcription from RNA polymerase II promoter* || transcriptional activator activity || YIR033W || 1082356	1	-0.08	0.2	-0.05	0.04	0.74	-0.19	0.23	0.26	-0.01	0.33	0.15	-0.13
A_06_P2376	NKP1 || biological process unknown || molecular function unknown || YDR383C || 1082357	1	-0.44	-0.34	0.27	0.81	1.29	2.5	-0.11	1.04	-0.26	-0.33	-0.11	0.69
A_06_P2767	|| biological process unknown || molecular function unknown || YER134C || 1082358	1	1.32	1	0.8	0.36	0.53	-0.86	-0.02	1.07	1.05	0.91	0.56	0.03
A_06_P4038	|| biological process unknown || molecular function unknown || YJL016W || 1082359	1	2.25	2.91	3.38	2.93	2.16	2.28	0.2	1.3	2.2	2.12	2.66	3.17
A_06_P6480	|| biological process unknown || molecular function unknown || YOR118W || 1082360	1	0.24	0.35	0.79	1.39	0.98	1.17	-0.27	-0.1	-0.3	-0.08	0.1	0.26
A_06_P3096	HUL5 || protein monoubiquitination* || ubiquitin-protein ligase activity || YGL141W || 1082362	1	1.33	1.62	1.65	1.64	1.65	1.75	0.12	0.54	1.55	1.46	1.14	1.3
A_06_P6502	SFL1 || negative regulation of transcription from RNA polymerase II promoter || specific transcriptional repressor activity || YOR140W || 1082363	1		-0.89	-0.03	-0.36	-0.24	0.09	-0.19	-0.94	-0.97	-0.93	-0.57	-0.43
A_06_P5738	PRC1 || vacuolar protein catabolism || carboxypeptidase C activity || YMR297W || 1082364	1	1.7	2.85	2.72	2.26	1.88	2.68	0.45	-0.52	1.25	1.17	0.92	0.92
A_06_P1252	RCR1 || cell wall organization and biogenesis || molecular function unknown || YBR005W || 1082365	1	0.39	0.76	0.97	0.66	0.8	0.64	0.19	-0.19	0.14	-0.13	0.22	0.64
A_06_P2654	|| biological process unknown || molecular function unknown || YER030W || 1082366	1	0.67	1.02	0.99	1.5	2.39	2.25	0.27	1.15	1.09	1.27	0.84	1.27
A_06_P3107	|| || || YGL152C || 1082367	1	-0.1	0.04	0.45				0.25
A_06_P3734	LIN1 || biological process unknown || protein binding || YHR156C || 1082368	1	-0.57	-0.45	0.59	1.78	1.84	1.51	-0.08	-0.13	-0.29	-0.14	0.33	0.52
A_06_P6674	HSD1 || biological process unknown || molecular function unknown || YOR311C || 1082369	1	-0.98	-0.97	-1.37	-0.95	-1.07	-1.41	-0.12	0.17	-0.1	-0.04	-0.34	-0.42
A_06_P1261	|| biological process unknown || molecular function unknown || YBR014C || 1082370	1	0.31	0.94	1.08	0.41	0.3	-0.75	0.21	0.44	0.66	0.56	0.28	-0.23
A_06_P5405	CTK3 || protein amino acid phosphorylation* || cyclin-dependent protein kinase activity || YML112W || 1082371	1	-0.63	-0.34	0	0.08	-0.94	-0.25	-0.38	-0.51	-0.27	-0.28	-0.12	-0.45
A_06_P3200	RTF1 || transcription from RNA polymerase II promoter* || RNA polymerase II transcription elongation factor activity || YGL244W || 1082372	1	-0.07	-0.12	-0.15	-0.52	-0.41	-0.55	-0.11	-0.32	-0.06	-0.02	-0.2	-0.42
A_06_P6705	RPA190 || transcription from RNA polymerase I promoter || DNA-directed RNA polymerase activity || YOR341W || 1082373	1	-1.97	-3.47	-4.17	-4.24	-4.27	-2.7	-0.04	-1.41	-4.95	-5.34	-3.55	-2.54
A_06_P6492	ORT1 || arginine biosynthesis* || L-ornithine transporter activity || YOR130C || 1082374	1	-0.25	-0.75	-1.19	-1.02	-0.91	-1.18	-0.02	0.18	1.04	0.73	0.09	0.03
A_06_P7118	NOT5 || regulation of transcription from RNA polymerase II promoter* || 3'-5'-exoribonuclease activity || YPR072W || 1082375	1	0.8	0.33	0.59	0.11	0.4	-0.52	0.17	0.39	0.58	0.62	0.09	0.22
A_06_P6525	DDP1 || diadenosine polyphosphate metabolism || diphosphoinositol-polyphosphate diphosphatase activity || YOR163W || 1082376	1	1.08	1.14	0.81	0.99	1.05	0.81	-0.1	0.96	1.48	1.43	1.21	0.95
A_06_P1912	DLD2 || biological process unknown* || actin binding* || YDL178W || 1082377	1	-0.31	-0.35	-0.09	-0.48	-0.32	-1.24	-0.14	-0.04	-0.73	-0.81	-0.88	-0.34
A_06_P5309	OST6 || protein complex assembly* || dolichyl-diphosphooligosaccharide-protein glycotransferase activity || YML019W || 1082378	1	-0.46	-0.78	-1.29	-1.29	-1.39	-1.64	0.53	-0.3	0.08	-0.1	-0.45	-0.66
A_06_P4221	MBB1 || || || YJL199C || 1082379	1	2.49	2.27	2.33	2.99	3	2.39	0.12	1.71	3.1	3	2.27	2.41
A_06_P7222	|| biological process unknown || molecular function unknown || YPR174C || 1082380	1	-1.53	-1.62	-1.62	-1.53	-1.02	-0.54	-0.37	-0.93	-0.58	-0.52	-0.06	0.35
A_06_P4193	|| biological process unknown || molecular function unknown || YJL171C || 1082381	1	-0.21	-0.69	-2.35	-3.98	-3.29	-4.09	0.18	-0.71	0.22	0.05	-0.42	-0.29
A_06_P3589	DED81 || asparaginyl-tRNA aminoacylation || ATP binding* || YHR019C || 1082382	1	-1.39	-1.57	-3.68	-4.14	-4.47	-3.12	0.04	-0.92	-2.34	-3.19	-2.51	-2.76
A_06_P1859	VCX1 || calcium ion homeostasis* || calcium ion transporter activity* || YDL128W || 1082383	1	0.29	0.18	0.49	0.69	0.11	0.02	-0.15	-0.42	0.57	0.44	0.27	-0.07
A_06_P6651	SNF2 || chromatin remodeling || general RNA polymerase II transcription factor activity || YOR290C || 1082384	1	0.39	0.31	0.97	0.15	-0.11	0.68	0.21	-0.81	-0.14	0.2	0.03	-0.25
A_06_P6734	MRS6 || intracellular protein transport || Rab escort protein activity || YOR370C || 1082385	1	-0.32	-0.39	-0.7	-0.14	-0.16	-0.21	-0.25	0.1	-0.85	-0.81	-0.79	-0.58
A_06_P4011	LYS1 || lysine biosynthesis via aminoadipic acid || saccharopine dehydrogenase (NAD+, L-lysine-forming) activity || YIR034C || 1082386	1	-0.98	-2.12	-3.48	-3.41	-3.05	-3.42	-0.47	-0.74	-0.42	-1.03	-1.27	-0.8
A_06_P3224	PEX31 || peroxisome organization and biogenesis || molecular function unknown || YGR004W || 1082387	1	-0.68	-0.55	-0.7	-1.11		-1.1	0.1	-0.29	-0.44	-0.43	-1.01	-1.17
A_06_P1572	|| biological process unknown || molecular function unknown || YCL021W-A || 1082388	1	-0.3	-0.54	-0.27	0.6	0.16	-0.1	-0.57	0.43	-0.2	-0.32	-0.64	-1.55
A_06_P3935	OM45 || biological process unknown || molecular function unknown || YIL136W || 1082389	1	6.08	6.38	7.37	5.37	6.64	6.64	0.96	1.93	3.83	3.88	3.87	4.96
A_06_P2550	GLC3 || glycogen metabolism || 1,4-alpha-glucan branching enzyme activity || YEL011W || 1082390	1	6.62	5.44	5.44	4.73	4.89	4.72	1.28	2.41	4.9	4.7	3.91	3.49
A_06_P1381	OPY1 || conjugation with cellular fusion || molecular function unknown || YBR129C || 1082391	1	-0.02	-0.1	0.07	0.84	1.07	0.85	-0.25	0.47	0.31	0.17	0.03	0.27
A_06_P6991	FAS2 || fatty acid biosynthesis* || phosphopantetheinyltransferase activity* || YPL231W || 1082392	1	0.14	0.05	-1.82	-1.93	-1.14	-0.81	0.54	-0.28	0.54	0.84	0.88	0.67
A_06_P3699	NDT80 || meiosis* || transcription factor activity || YHR124W || 1082393	1	0.82	0.96	0.99	2.21	2.73	1.94	-0.36	1.47	1.19	1.14	1.4	2.3
A_06_P6528	|| biological process unknown || molecular function unknown || YOR166C || 1082394	1	-1.26	-0.73	-1.19	-0.96	-1.01	-0.68	-0.3	-0.52	-1.35	-1.32	-1.09	-1.66
A_06_P1195	PRX1 || regulation of cell redox homeostasis || thioredoxin peroxidase activity || YBL064C || 1082395	1	3.23	4.48	4.49	4.45	4.38	4.18	0.61	1.28	3.17	3.28	3.34	3.25
A_06_P5656	GUA1 || GMP metabolism || GMP synthase (glutamine-hydrolyzing) activity || YMR217W || 1082396	1	-1.81	-3.97	-4.93	-4.42	-4.66	-3.94	-0.32	-1.25	-4.04	-5.22	-3.52	-2.71
A_06_P7172	|| biological process unknown || molecular function unknown || YPR125W || 1082397	1	-1.18	-0.89	-1.48	-1.83	-2.62	-2.04	-0.19	-1.06	-1.79	-1.8	-1.12	-1.44
A_06_P2428	PPM1 || C-terminal protein amino acid methylation || C-terminal protein carboxyl methyltransferase activity || YDR435C || 1082398	1	1.92	1.48	1.83	2.67	2.25	1.8	-0.02	1.43	2.04	1.51	0.94	0.39
A_06_P2909	CMK1 || protein amino acid phosphorylation* || calmodulin-dependent protein kinase I activity || YFR014C || 1082399	1	3.09	3.45	3.81	2.56	2	2.24	0.66	0.12	1.63	1.49	1.34	1.19
A_06_P6050	CAF120 || regulation of transcription from RNA polymerase II promoter || molecular function unknown || YNL278W || 1082400	1	-0.31	0.08	0.62	0.53	0.45	0.78	0.43	-0.04	0.38	0.68	0.48	0.54
A_06_P6449	YVC1 || cation homeostasis || calcium channel activity* || YOR087W || 1082401	1		0.33	0.31	-1.41	-1.87	-2.23	0.02	-1.63	-0.6	-0.41	-1.48	-2.38
A_06_P2458	RMT2 || peptidyl-arginine methylation || protein-arginine N-methyltransferase activity || YDR465C || 1082402	1	-2.44	-4.77	-4.54	-4.09	-4.12	-3.47	-0.29	-1.85	-4.81	-5.4	-3.08	-2.92
A_06_P5039	|| biological process unknown || molecular function unknown || YLR225C || 1082403	1	0.81	0.61	0.27	0.2	0.63	0	0.11	0.48	1.45	1.42	1.1	0.79
A_06_P4954	RRN5 || transcription from RNA polymerase I promoter || RNA polymerase I transcription factor activity* || YLR141W || 1082404	1	-0.05	-0.23	0.22	-1.28	-1.38	-0.99	-0.23	-1.48	-1.1	-0.67	-1.27	-1.43
A_06_P6063	MID1 || calcium ion transport || calcium channel activity* || YNL291C || 1082405	1	-0.88	-0.88	-1.23	-0.76	-1.15	-0.9	-0.32	-0.14	-0.52	-0.65	-0.49	-0.93
A_06_P6978	SAR1 || ER to Golgi transport || GTPase activity || YPL218W || 1082406	1	0.04	0.04	-0.93	0.37	0.07	0.08	-0.2	1.52	0.96	0.94	0.81	0.71
A_06_P1272	|| biological process unknown || molecular function unknown || YBR025C || 1082407	1	-0.95	-1.2	-3.12	-2.6	-2.46	-1.38	0.23	-0.42	-2.38	-3.7	-2.26	-1.43
A_06_P2799	BCK2 || G1/S transition of mitotic cell cycle* || molecular function unknown || YER167W || 1082408	1	-0.05	0.19	0.14	0.6	0.85	1.2	-0.11	0.03	0.05	-0.01	0.26	0.27
A_06_P3081	SCS3 || phospholipid metabolism || molecular function unknown || YGL126W || 1082409	1	-0.3	-0.04	-0.26	-1.29	-1.1	-1.02	-0.18	-1.04	0.21	0.14	-0.22	-0.38
A_06_P4683	|| biological process unknown || molecular function unknown || YKR045C || 1082410	1	0.25	-0.52	-0.38	-1.04	-0.81	-0.99	0.12	-0.77	-0.8	-0.98	-1.21	-1.33
A_06_P1227	|| || || YBL094C || 1082411	1	-0.43	-0.03	0.4				0.33	-0.23	0.13		0.41	0.12
A_06_P5624	|| biological process unknown || molecular function unknown || YMR187C || 1082412	1	-0.97	-1.4	-0.97	0.08	-0.59	0.17	-0.22	-0.85	-0.65	-0.39	-0.41	-0.74
A_06_P6919	CDC60 || leucyl-tRNA aminoacylation || leucine-tRNA ligase activity || YPL160W || 1082413	1	-1.45	-1.86	-3.77	-4.19	-4.41	-3.23	-0.02	-1.23	-2.93	-3.21	-2.96	-2.65
A_06_P1231	BNA4 || NAD biosynthesis || kynurenine 3-monooxygenase activity || YBL098W || 1082414	1	-0.25	-0.56	-1.25	-1.28	-0.86	-1.67	0.12	0.22	-1.29	-1.21	-1.38	-1.41
A_06_P1176	|| biological process unknown || molecular function unknown || YBL046W || 1082415	1	0.4	-0.47	-0.18	-0.58	-1.23	-0.87	-0.16	0.21	0.12	0.12	-0.07	0.02
A_06_P6401	CKB2 || protein amino acid phosphorylation* || protein kinase CK2 regulator activity || YOR039W || 1082416	1	-0.06	-0.49	-0.64	-0.62	-1.05	-0.94	0.27	0.18	0.22	0.09	-0.28	-0.24
A_06_P2930	RPL29 || protein biosynthesis || structural constituent of ribosome || YFR032C-A || 1082417	1	-0.66	-1.46	-4.06	-3.74	-2.87	-1.67	0.21	1.07	-2.47	-3.33	-2.38	-0.42
A_06_P3172	|| || || YGL217C || 1082418	1	-1.45	-0.39	0.31	-0.99	0.3	0.1	-0.06	-0.96	0.52	1.3	0.67	-0.28
A_06_P6209	TLG2 || vesicle fusion || v-SNARE activity* || YOL018C || 1082419	1	0.79	0.6	1.21	1.33	0.75	0.56	0.13	0.37	0.82	0.82	0.66	0.45
A_06_P6410	RAT1 || 35S primary transcript processing* || 5'-3' exoribonuclease activity || YOR048C || 1082420	1	-1.48	-1.51	-2.42	-1.34	-2.12	-1.09	-0.09	-0.89	-1.08	-1.01	-0.82	-1.36
A_06_P2961	PMC1 || calcium ion homeostasis* || calcium-transporting ATPase activity || YGL006W || 1082421	1	2.23	2.39	2.74	2.85	2.86	3.06	0.38	0.91	2.19	2.07	2	1.86
A_06_P4020	|| biological process unknown || molecular function unknown || YIR043C || 1082422	1	1.01	1.17	1.63	1.52	1.41	0.64	-0.06	0.72	1.13	1.03	0.83	0.87
A_06_P6419	SGT1 || protein complex assembly* || chaperone binding || YOR057W || 1082423	1	-0.14	-0.04	0.12	0.77	0.74	0.27	-0.12	0.41	0.32	0.38	0.53	0.72
A_06_P3311	PRP31 || nuclear mRNA splicing, via spliceosome || RNA splicing factor activity, transesterification mechanism || YGR091W || 1082425	1	-0.48	-0.23	-0.08	-0.38	-0.78	-0.37	0.15	-0.6	-0.8	-0.55	-0.64	-0.62
A_06_P3494	|| processing of 20S pre-rRNA || molecular function unknown || YGR272C || 1082426	1	-4.48	-3.67	-4.39	-3.81	-3.2	-2.53	-0.01	-1.5	-4.75	-3.97	-2.59	-2.58
A_06_P4845	RSC58 || chromatin remodeling || molecular function unknown || YLR033W || 1082428	1	-0.13	-0.3	-0.27	0.23	-0.43	-0.29	-0.22	0.47	0.06	0.25	0.07	-0.44
A_06_P5092	YSH1 || mRNA polyadenylylation* || RNA binding* || YLR277C || 1082429	1	-0.67	-0.18	-0.47	-0.13	-0.41	-0.08	-0.01	0.1	-0.58	-0.45	-0.38	-0.72
A_06_P1223	MAP2 || proteolysis and peptidolysis || methionyl aminopeptidase activity || YBL091C || 1082430	1	-0.09	0.12	-0.15	-0.52	-1.72	-0.92	-0.01	-0.19	-0.14	-0.15	-0.34	-0.67
A_06_P5444	SOK2 || pseudohyphal growth || transcription factor activity || YMR016C || 1082431	1	-0.89	-1.21	-0.56	0.11	0.3	0.36	0.41	0.42	-0.17	-0.02	0.08	1.19
A_06_P3722	DCD1 || pyrimidine nucleotide metabolism || dCMP deaminase activity || YHR144C || 1082432	1	-2.73	-2.69	-4.48	-4.07		-5.01	-0.78	0.2	-2.28	-2.52	-1.98	-2.29
A_06_P2162	HMO1 || plasmid maintenance || single-stranded DNA binding* || YDR174W || 1082433	1	0.39	0.42	-0.27	-0.77	-0.91	-0.7	-0.29	-0.03	-0.25	-0.67	-0.97	-0.63
A_06_P4671	DAL80 || transcription* || transcription factor activity || YKR034W || 1082434	1	0.78	-0.25	-1.68	-1.86	-2.2	-1.83	1.54	0.48	2.77	2.54	2.31	2.36
A_06_P4589	LST4 || vesicle-mediated transport* || protein transporter activity || YKL176C || 1082435	1	-0.39	-0.32	0.19	-0.01	0.92	0.44	-0.18	-1.13	-0.81	-0.64	-0.22	0.13
A_06_P5117	|| cotranslational protein-membrane targeting || molecular function unknown || YLR301W || 1082439	1	-1.06	-1.25	-2.53	-2.43	-1.89	-2.52	0.54	0.81	0.78	0.96	0.28	0.27
A_06_P1993	|| || || YDR008C || 1082440	1			0.82					0.56			0.29
A_06_P5679	CUS1 || spliceosome assembly || protein binding* || YMR240C || 1082442	1	-0.82	-0.49	0.07	-1.2	-1.37	-1.05	0.01	-0.63	-1.31	-1.12	-1.07	-0.84
A_06_P4032	RPC17 || transcription initiation from RNA polymerase III promoter || DNA-directed RNA polymerase activity || YJL011C || 1082443	1	-3.09	-2.39	-4.15	-2.08	-2	-1.49	-0.75	0.57	-3.24	-3.24	-1.76	-1.17
A_06_P6758	|| biological process unknown || molecular function unknown || YOR394W || 1082444	1	0.5	0.74	1.61	2.4	3.97	3.41	-0.19	0.45	1.33	1.27	1.19	1.66
A_06_P6334	PPM2 || biological process unknown || C-terminal protein carboxyl methyltransferase activity || YOL141W || 1082445	1										-1.25
A_06_P6485	LEO1 || transcription from RNA polymerase II promoter* || RNA polymerase II transcription elongation factor activity || YOR123C || 1082446	1	0.01	0	0.69	-0.08	-0.17	0.16	0.04	-0.64	-0.54	-0.33	-0.27	-0.35
A_06_P3526	|| biological process unknown || transporter activity || YHL008C || 1082447	1	0.7	1.19	1.74	1.3	1.01	1.73	-0.05	-0.19	0.08	0.14	0.27	0.65
A_06_P6549	TUF1 || translational elongation || GTPase activity* || YOR187W || 1082448	1	1.28	2.33	1.98	0.18	-0.56	-0.75	0.56	0.24	-0.41	-0.34	-0.54	-0.31
A_06_P2063	RAD55 || meiotic DNA recombinase assembly* || protein binding || YDR076W || 1082449	1		-1.33	-1.61	-0.79	0.53	0.26	0.07	-1.14	-0.6	-0.28	0.1	0.99
A_06_P6238	|| biological process unknown || molecular function unknown || YOL047C || 1082450	1		-0.41	-0.23				-0.66	0.68
A_06_P5932	CBK1 || regulation of exit from mitosis* || protein kinase activity || YNL161W || 1082451	1	0.13	-0.18	-0.2	0.27	0.53	0.66	-0.24	0.2	-0.42	-0.28	-0.11	0.91
A_06_P2202	UPC2 || sterol biosynthesis* || RNA polymerase II transcription factor activity || YDR213W || 1082452	1	-1.19	-0.73	-1.11	-2.16	-1.71	-0.89	0.05	-1.73	-1.15	-0.69	-0.67	-0.38
A_06_P3339	NUP57 || mRNA-nucleus export* || structural molecule activity || YGR119C || 1082454	1	-0.29	-0.49	-0.52	-0.16	-0.36	-0.66	-0.22	0.24	-0.8	-0.62	-0.61	-1.19
A_06_P7214	MRP2 || protein biosynthesis || structural constituent of ribosome || YPR166C || 1082455	1	0.94	1.5	1.15	0.6	0.84	-0.39	0.65	0.91	0.64	0.72	0.42	0.6
A_06_P1888	CLB3 || G2/M transition of mitotic cell cycle* || cyclin-dependent protein kinase regulator activity || YDL155W || 1082456	1	-0.24	-0.79	-0.23	-0.9	-1.67	-1.26	-0.09	-0.55	-0.58	-0.32	-0.42	-1.06
A_06_P1158	|| biological process unknown || molecular function unknown || YBL029C-A || 1082457	1	1.72	1.92	2.84	2.38	2.22	1.77	0.47	0.82	1.35	1.5	1.5	1.6
A_06_P3940	|| || || YIL141W || 1082458	1	1.22		-0.2
A_06_P7020	APM1 || vesicle-mediated transport || clathrin binding || YPL259C || 1082459	1	0.39	0.14	0.33	-0.51	-0.33	-0.7	0.03	-0.47	-0.36	-0.32	-0.69	-1.23
A_06_P4869	|| biological process unknown || molecular function unknown || YLR057W || 1082460	1	-1.26	-0.61	-1.34	-0.32	-0.22	-0.55	-0.26	0.53	-0.59	-0.4	-0.16	0.22
A_06_P3099	ROG1 || lipid metabolism || lipase activity || YGL144C || 1082462	1	-1.5	-1.09	-0.92	0.22	1.34	1.07	-0.48	0.19	-0.33	-0.06	0.23	1.45
A_06_P5763	ADH6 || aldehyde metabolism* || alcohol dehydrogenase (NADP+) activity || YMR318C || 1082463	1	-0.66	-0.93	-2.61	-3.17	-3.82	-3.71	-0.08	-0.62	-1.11	-1.24	-1.45	-1.61
A_06_P4276	RAV1 || vacuolar acidification* || molecular function unknown || YJR033C || 1082464	1	1.01	1.35	1.42	1.14	1.18	1.35	0.11	0.08	0.7	0.75	0.58	0.35
A_06_P6851	SSU1 || sulfite transport || sulfite transporter activity || YPL092W || 1082465	1	-0.56	-1.18	-0.89	1.4	2.47	2.56	0.22	-0.6	-1.73	-1.71	-0.76	0.85
A_06_P1269	POA1 || tRNA splicing || phosphoric monoester hydrolase activity || YBR022W || 1082466	1	0.04	0.48	0.01	0.23	1.04	0.55	-0.05	1.04	1.26	1.03	0.87	0.4
A_06_P1209	|| || || YBL077W || 1082467	1	-0.99	-1.66					0.03	-0.14	-2.85	-2.92	-2.61	-2.14
A_06_P2797	PAB1 || regulation of translational initiation || poly(A) binding || YER165W || 1082468	1	-1.76	-1.8	-2.84	-2.91	-3.1	-1.64	0.14	-1.53	-2.72	-2.93	-2.21	-2.28
A_06_P2029	|| biological process unknown || molecular function unknown || YDR042C || 1082469	1			-0.41				-0.3	0.82			-0.88
A_06_P6234	NTG2 || base-excision repair* || DNA-(apurinic or apyrimidinic site) lyase activity* || YOL043C || 1082470	1	0.2	0.39	1.02	0.97	0.81	0.93	0.01	0.09	0.15	0.21	0.38	0.54
A_06_P2555	|| biological process unknown || molecular function unknown || YEL016C || 1082472	1	-0.5	-0.18	-0.38	-0.16	-0.51	-0.8	-0.14	0.21	0.02	0.44	0.36	0.13
A_06_P4365	CAF17 || biological process unknown || molecular function unknown || YJR122W || 1082473	1	0.49	1.06	0.83	1.25	2.24	1.66	-0.22	0.56	0.06	0.09	0.22	0.35
A_06_P2332	|| protein biosynthesis || arginine-tRNA ligase activity || YDR341C || 1082474	1	-1.41	-1.83	-2.66	-2.63	-2.59	-2.24	0.01	-1.09	-2.17	-2.31	-1.75	-1.98
A_06_P3303	GCD2 || translational initiation || translation initiation factor activity* || YGR083C || 1082475	1	-1.83	-1.36	-2.07	-1.39	-1.44	-1.06	-0.14	-0.05	-2.21	-1.95	-1.38	-1.42
A_06_P1636	|| biological process unknown || molecular function unknown || YCR015C || 1082476	1	0.54	0.17	0.14	1.26	1.07	0.21	-0.23	0.57	1.35	0.96	0.47	0.12
A_06_P3679	GRE3 || response to stress* || aldo-keto reductase activity* || YHR104W || 1082477	1	2.48	3.74	3.01	2.92	1.6	1.21	0.11	1.83	3.12	2.74	2.76	1.85
A_06_P5999	JJJ1 || endocytosis || molecular function unknown || YNL227C || 1082478	1	-1.6	-1.9	-2.09	-1.35	-1.51	-0.77	-0.12	-0.77	-2.64	-2.13	-1.4	-0.75
A_06_P3297	PEX8 || peroxisome organization and biogenesis* || peroxisome targeting sequence binding || YGR077C || 1082479	1	0.63	0.72	1.18	1.37	1.12	0.98	-0.16	-0.06	0.8	0.71	0.29	0.08
A_06_P6337	NOP8 || rRNA processing* || molecular function unknown || YOL144W || 1082480	1	-2.92	-3.04	-3.55	-3.07	-3.41	-2.79	-0.33	-2.06	-4.66	-4.65	-2.58	-2.84
A_06_P5570	CIN4 || microtubule-based process || GTP binding || YMR138W || 1082481	1	-1.11	-1.35	-1.4	-0.36	-0.28	-0.1	-0.23	-0.42	-0.86	-0.97	-0.65	-0.78
A_06_P3990	|| biological process unknown || molecular function unknown || YIR014W || 1082482	1	1.78	2.21	3.17	3.25	2.86	3.29	0.3	0.8	2.48	2.38	2.43	2.43
A_06_P5524	SNO1 || pyridoxine metabolism* || molecular function unknown || YMR095C || 1082483	1		-0.73	-0.23	1.07	1.77	1.47	-0.28	-0.28			-0.93	-0.41
A_06_P2466	PRP3 || nuclear mRNA splicing, via spliceosome || RNA splicing factor activity, transesterification mechanism || YDR473C || 1082484	1	-0.02	-0.12	0.77	0.97	1.26	0.63	-0.06	-0.23	-0.36	-0.07	0.11	0.27
A_06_P5591	|| biological process unknown || molecular function unknown || YMR158C-A || 1082485	1	0.1	0.05	0.76	1.31	1.73	1.41	-0.03	0.87	0.64	0.68	0.68	0.43
A_06_P2895	LOC1 || ribosomal large subunit biogenesis* || mRNA binding || YFR001W || 1082486	1	-1.68	-2.42	-3.03	-1.4	0.17	-0.34	-0.36	-0.72	-2.93	-2.64	-1.31	-0.29
A_06_P5330	CAT2 || carnitine metabolism || carnitine O-acetyltransferase activity || YML042W || 1082487	1	1.52	2.34	7.09	5.83	6.64	6.54	0.04	0.42		0.68	2.3	2.45
A_06_P6273	IRA2 || Ras protein signal transduction || Ras GTPase activator activity || YOL081W || 1082488	1	0.83	1.08	1.88	2.15	3.01	3.16	0.53	0.2	1.12	1.17	1.34	1.64
A_06_P3134	TOS3 || glucose metabolism || protein kinase activity || YGL179C || 1082489	1	1.07	0.61	-0.05	0.55	0.65	-0.19	0.32	1.24	1.77	1.78	1.14	1.24
A_06_P4531	VPH2 || protein complex assembly* || molecular function unknown || YKL119C || 1082491	1	0.17	0.13	-0.07	-0.76	0.03	-1.06	0.7	0.32	0.52	0.64	0.23	0.49
A_06_P2795	|| biological process unknown || molecular function unknown || YER163C || 1082492	1	0.87	1.43	0.32	-0.08	-1.34	-1.81	-0.04	0.97	1.05	0.81	0.6	0.07
A_06_P6594	MGE1 || mitochondrial matrix protein import || unfolded protein binding || YOR232W || 1082493	1	-0.31	0.18	-0.8	-0.96	-0.95	-1.54	0.07	0.34	-0.68	-0.91	-1.04	-1.52
A_06_P5082	|| biological process unknown || molecular function unknown || YLR267W || 1082494	1				5.38
A_06_P3741	SOL3 || tRNA processing* || 6-phosphogluconolactonase activity || YHR163W || 1082495	1	-0.94	-1.42	-2.75	-2.49	-2.7	-3.39	-0.29	0.35	-1.67	-1.84	-1.54	-1.44
A_06_P2833	WWM1 || response to dessication || molecular function unknown || YFL010C || 1082496	1	0.18	0.24	-0.93	-1.45	-1.97	-2.06	-0.13	0.57	0.66	0.64	0.22	0.04
A_06_P6601	ABP140 || actin cytoskeleton organization and biogenesis || S-adenosylmethionine-dependent methyltransferase activity* || YOR239W || 1082497	1	-0.52	-0.81	-1.49	-2.01	-2.33	-1.97	-0.08	-0.77	-1.12	-1.1	-1.3	-1.66
A_06_P4774	|| biological process unknown || molecular function unknown || YLL029W || 1082498	1	1.55	1.32	2.5	1.94	2.37	1.85	0.15	-0.12	0.77	1.05	1.14	1.57
A_06_P4591	STE3 || signal transduction during conjugation with cellular fusion || mating-type a-factor pheromone receptor activity || YKL178C || 1082499	1	-0.09	0.06	-0.5	1.17	0.89	1.22	-0.25	0.76			0.82	0.46
A_06_P6217	MIM1 || protein complex assembly* || molecular function unknown || YOL026C || 1082500	1	0.58	0.81	1.06	1.64	1.22	1.51	0.06	0.67	0.26	0.31	0.4	0.37
A_06_P1173	ECM13 || cell wall organization and biogenesis || molecular function unknown || YBL043W || 1082501	1			6.84
A_06_P3228	STF2 || ATP synthesis coupled proton transport* || molecular function unknown || YGR008C || 1082502	1	5.97	6.32	6.32	5.58	6.64	5.55	1.08	3.4	4.93	4.75	4.39	5
A_06_P5694	GFD1 || mRNA-nucleus export || molecular function unknown || YMR255W || 1082503	1	0.7	0.76	1.73	1.19	0.92	1.32	0.68	0.36	1	1.26	0.68	0.4
A_06_P1379	VMA2 || vacuolar acidification || hydrogen-transporting ATPase activity, rotational mechanism || YBR127C || 1082504	1	-0.58	-0.06	-1.35	-1.93	-2.5	-1	-0.08	-1.4	-0.31	-0.32	-0.66	-0.59
A_06_P1385	HSL7 || regulation of progression through cell cycle* || protein-arginine N-methyltransferase activity || YBR133C || 1082505	1	-0.42	-0.56	-0.69	-0.61	-1.69	-1.17	-0.45	-0.12	-0.46	-0.16	-0.34	-0.71
A_06_P3881	|| || || YIL082W-A || 1082506	1	-0.15	0.43	1.01	0.39	0.04	0.74	0.49	-0.87	-0.46	-0.1	-0.26	-0.92
A_06_P2178	SLY1 || ER to Golgi transport || SNARE binding || YDR189W || 1082507	1	-0.19	-0.18	-0.3	-0.91	-1.58	-1.07	0.08	-0.67	-0.73	-0.61	-0.87	-1.22
A_06_P5258	MRPL4 || protein biosynthesis || structural constituent of ribosome || YLR439W || 1082508	1	0.67	1.39	1.69	0.7	1.03	0.79	0.01	0.17	0.31	0.41	0.12	-0.03
A_06_P3815	BAR1 || protein catabolism || aspartic-type endopeptidase activity || YIL015W || 1082509	1	-0.57	-0.8	-0.46	-1.07	-1.76	-3.14	-0.26	0.55	0.38	0.74	0.08	-1.41
A_06_P4927	|| biological process unknown || molecular function unknown || YLR114C || 1082510	1	-0.72	-0.83	-1.19	-0.99	-0.95	-1.23	-0.14	-0.03	-0.42	-0.33	-0.34	-0.58
A_06_P2948	PRE4 || ubiquitin-dependent protein catabolism || endopeptidase activity || YFR050C || 1082511	1	0.75	0.86	0.72	0.57	0.06	0.2	0.32	0.5	0.51	0.32	0.05	-0.23
A_06_P5331	RRN11 || transcription from RNA polymerase I promoter || RNA polymerase I transcription factor activity || YML043C || 1082512	1	-4.39	-3.5	-2.23	-2.58	-2.82	-2.97	-0.56	-1.78	-5.08	-4.51	-2.71	-2.8
A_06_P3887	AVT7 || transport || transporter activity || YIL088C || 1082513	1	0.73	0.77	0.51	0.47	0.91	0.54	0.55	0.76	1.59	1.57	1.29	1.47
A_06_P4340	JJJ3 || peptidyl-diphthamide biosynthesis from peptidyl-histidine || molecular function unknown || YJR097W || 1082514	1	-0.39	-2.14	-1.41				0.01	-2.34			-2.54	-1.45
A_06_P1398	MRPS9 || protein biosynthesis || structural constituent of ribosome || YBR146W || 1082515	1	0.43	1.21	1.51	0.24	0.54	-0.41	0.38	-0.5	-0.38	-0.34	-0.39	-1.05
A_06_P6728	|| || || YOR364W || 1082516	1	-0.36										0.01
A_06_P3784	SKN7 || response to osmotic stress* || transcription factor activity* || YHR206W || 1082517	1	-1.16	-1.06	-0.89	-0.52	-0.84	-0.19	-0.5	-0.89	-1.17	-1.18	-0.58	-0.97
A_06_P3817	VID28 || negative regulation of gluconeogenesis || molecular function unknown || YIL017C || 1082519	1	2.62	2.48	3.2	3.44	3.51	3.36	0.45	1.66	2.63	2.56	2.45	2.67
A_06_P6107	|| biological process unknown || molecular function unknown || YNL335W || 1082520	1	-0.25	0.43	-0.08				-0.31
A_06_P5190	SUR4 || sphingolipid biosynthesis* || fatty acid elongase activity || YLR372W || 1082521	1	-2.52	-2.62	-4.42	-4.12	-4.46	-4.02	0.02	-0.14	-1.86	-1.81	-1.57	-1.97
A_06_P6872	|| metabolism || oxidoreductase activity || YPL113C || 1082522	1	2.8	2.98	4.31	5.01	5.71	5.34	0.18	1.49	1.2	0.95	0.78	0.45
A_06_P5237	|| biological process unknown || helicase activity || YLR419W || 1082523	1	-1.99	-1	-1.86	-1.57	-1.65	-0.88	-0.25	-1.38	-2.37	-1.98	-1.33	-1.08
A_06_P3031	RPL7A || protein biosynthesis || structural constituent of ribosome || YGL076C || 1082524	1	-1.81	-2.36	-4.32	-4.43	-3.79	-3.04	0.17	0.03	-2.82	-3.84	-2.88	-2.11
A_06_P2655	YPT31 || vesicle-mediated transport* || GTPase activity || YER031C || 1082525	1	-0.08	-0.24	-1.06	-0.94	-1.72	-1.39	-0.18	0.33	0.04	-0.01	-0.15	-0.63
A_06_P3535	|| biological process unknown || molecular function unknown || YHL017W || 1082526	1	-0.2	0.02	-0.01	-1.32	-0.77	-0.79	0.16	-1.25	-0.95	-0.96	-0.67	-0.77
A_06_P6612	|| biological process unknown || thiosulfate sulfurtransferase activity || YOR251C || 1082527	1	-0.25	-0.06	-0.26	0.02	-0.86	-0.23	-0.08	-0.3	-0.42	-0.25	-0.38	-0.48
A_06_P1154	RRN10 || transcription from RNA polymerase I promoter || RNA polymerase I transcription factor activity* || YBL025W || 1082528	1	-0.47	-0.5	0.01	-1.1	-0.03	-0.62	0.41	-1.33	-0.8	-0.44	-0.85	-0.94
A_06_P3759	|| biological process unknown || molecular function unknown || YHR181W || 1082529	1	0.06	0.15	-0.2	-0.87	-0.18	-0.83	0.46	0.06	0.63	0.65	0.36	0.3
A_06_P4744	|| transport || transporter activity || YKR106W || 1082530	1	0.6	0.63	0.72				-0.55	0.53
A_06_P6272	REX4 || rRNA processing* || 3'-5' exonuclease activity || YOL080C || 1082531	1		-4.31	-5.2	-4.33			-0.46	-2.26	-5	-5.16	-3.31	-3.35
A_06_P2297	SRB7 || transcription from RNA polymerase II promoter || RNA polymerase II transcription mediator activity || YDR308C || 1082532	1	-0.54	-0.51	-0.41	-0.74	-0.28	-1	0.41	0.44	0.98	0.76	0.19	-0.18
A_06_P6845	ELP3 || regulation of transcription from RNA polymerase II promoter || RNA polymerase II transcription elongation factor activity* || YPL086C || 1082533	1	-1.86	-2.62	-4.42	-2.56	-2.77	-1.8	-0.6	-0.39	-3.67	-3.43	-2.25	-1.9
A_06_P4832	YEH2 || cell wall mannoprotein biosynthesis* || sterol esterase activity || YLR020C || 1082534	1	-1.27	-1.56	-2.13	-1.92	-1.46	-1.77	-0.42	-0.45	-0.95	-1.09	-1.22	-1.29
A_06_P4130	PRM10 || conjugation with cellular fusion || molecular function unknown || YJL108C || 1082535	1	-0.29	-0.58	-1.67	-2.12		-1.92	-0.56	0.08	0.07	-0.13	0.06	0.13
A_06_P5178	DCR2 || traversing start control point of mitotic cell cycle || hydrolase activity, acting on ester bonds || YLR361C || 1082536	1	0.39	0.27	0.21	1.08	0.69	0.6	-0.15	0.5	0.81	0.77	0.56	0.58
A_06_P7095	ATG11 || protein-vacuolar targeting* || molecular function unknown || YPR049C || 1082537	1	-0.26	0.07	1.02	1.93	2.09	2.23	0.1	-0.39	0.05	0.44	1	1.8
A_06_P1814	|| biological process unknown || molecular function unknown || YDL085C-A || 1082538	1	-0.78	0.06	0.35	-0.85	-0.01	-0.79	1.02	-1.01	-0.78	-0.35	-0.96	-0.53
A_06_P4196	KRE9 || cell wall organization and biogenesis* || molecular function unknown || YJL174W || 1082539	1	-0.23	-0.44	-0.88	-1.38	-1.64	-1.94	0.12	0	0.01	-0.1	-0.15	-1.04
A_06_P2334	HXT6 || hexose transport || glucose transporter activity* || YDR343C || 1082540	1	8.34	6.93	5.89	3.72	4	3.36	0.96	2.95	2.65	2.14	3.49	2.25
A_06_P6192	IZH2 || lipid metabolism* || metal ion binding || YOL002C || 1082541	1	-1.01	-1.08	-2.06	-1.8	-1.59	-2.16	0.08	-0.5	-0.46	-0.15	0.2	0.58
A_06_P3795	IMD2 || GTP biosynthesis || IMP dehydrogenase activity || YHR216W || 1082542	1	-0.3	-1.48	-2.34	-4.46	-2.12	-3.44	-0.7	-0.58	-1.36	-1.71	-2.83	-3.48
A_06_P6333	ARG8 || arginine biosynthesis* || acetylornithine transaminase activity || YOL140W || 1082543	1	-1.82	-2.49	-2.82	-3.55	-3.06	-3.09	-0.14	-1.33	-1.86	-1.46	-1.55	-1.65
A_06_P7196	|| biological process unknown || molecular function unknown || YPR148C || 1082544	1	1.22	1.1	1.64	0.95	1.1	0.13	0.2	0.41	0.21	0.31	0.2	0.77
A_06_P2295	|| ubiquitin-dependent protein catabolism || protein binding || YDR306C || 1082546	1	1.44	1.01	2.1	2.61	1.47	1.89	-0.07	-0.13	0.77	0.68	0.88	0.61
A_06_P2624	PMI40 || protein amino acid glycosylation* || mannose-6-phosphate isomerase activity || YER003C || 1082547	1	-0.38	-0.98	-2.88	-3.07	-3.39	-2.73	0.02	0.07	0.28	0.14	0.01	-0.6
A_06_P5494	UBX4 || ubiquitin-dependent protein catabolism* || molecular function unknown || YMR067C || 1082549	1	0.22	0.62	0.13	0.11	0.26	-0.06	0.01	0.59	0.59	0.38	0.12	-0.1
A_06_P5540	|| biological process unknown || molecular function unknown || YMR111C || 1082550	1	0.3	0.34	0.98	0.59	0.51	0.25	0.25	-0.41	0.17	0.25	0.02	-0.11
A_06_P2363	CTS2 || biological process unknown || molecular function unknown || YDR371W || 1082551	1	0.99	0.84	0.55	0.85	0.45	0.33	0.11	0.91	1.65	1.31	0.42	-0.21
A_06_P4361	ILM1 || mitochondrial genome maintenance* || molecular function unknown || YJR118C || 1082552	1	-0.13	-0.63	-2.05	-0.22	0.44	-0.42	-1.54	1.85	1.78	1.62	1.26	1.09
A_06_P4550	MRPL31 || protein biosynthesis || structural constituent of ribosome || YKL138C || 1082553	1	0.92	1.33	0.98	0.7	0.84	0.23	0.24	0.92	0.26		0.11	-0.08
A_06_P2843	SMX2 || nuclear mRNA splicing, via spliceosome || RNA splicing factor activity, transesterification mechanism || YFL017W-A || 1082554	1	-0.05	-0.26	-0.28	-0.03	-0.45	-0.77	-0.27	0.75	0.29	0.22	0.19	-0.01
A_06_P6954	DDC1 || meiosis* || molecular function unknown || YPL194W || 1082555	1	-0.16	-0.18	0.31	-0.43	0.2	0.29	0.34	-0.97	0.14	0.14	-0.08	0.04
A_06_P1147	POP8 || rRNA processing* || ribonuclease P activity* || YBL018C || 1082556	1	-1.92	-2.48	-2.49	-1.48	-0.6	-0.93	0.1	-0.63	-1.06	-0.82	-0.56	0.21
A_06_P5447	STB4 || biological process unknown || DNA binding || YMR019W || 1082557	1	-0.67	-0.77	-0.38	0.37	0.4	0.21	-0.01	-0.1	-0.61	-0.4	-0.34	-0.31
A_06_P5391	TSL1 || response to stress* || enzyme regulator activity* || YML100W || 1082559	1	5.17	4.87	4.92	3.39	3.8	3.45	1.16	1.89	3.56	3.42	3.37	3.57
A_06_P5130	SPH1 || actin filament organization* || cytoskeletal regulatory protein binding || YLR313C || 1082560	1	-1.43	-1.45	-2.38	-3.03		-1.93	-0.07	-0.51	-0.7	-0.52	-0.56	-0.47
A_06_P2387	RPT3 || ubiquitin-dependent protein catabolism || ATPase activity* || YDR394W || 1082562	1	0.46	0.66	0.33	0.17	0.09	0.29	0.02	0.56	0.6	0.36	-0.09	-0.39
A_06_P2784	UBP3 || protein deubiquitination || ubiquitin-specific protease activity || YER151C || 1082563	1	-0.87	-0.28	-0.3	-0.42	-0.5	-0.39	0.27	-0.39	-0.42	-0.18	-0.12	-0.85
A_06_P4073	TDH1 || glycolysis* || glyceraldehyde-3-phosphate dehydrogenase (phosphorylating) activity || YJL052W || 1082564	1	0.47	1.46	-1.68	-1.23	-1.91	0.63	-0.12	-0.51	-0.38	-1.22	0.08	0.43
A_06_P5193	STP3 || biological process unknown || molecular function unknown || YLR375W || 1082565	1	0.29	-0.07	0.78	0.01	0.37	0.33	0.15	-0.77	-0.07	0.18	0.18	0.42
A_06_P6023	NRD1 || transcription termination from Pol II promoter, RNA polymerase(A)-independent || RNA binding || YNL251C || 1082567	1	-0.43	0.52	0.68	-0.49	-0.18	0.71	-0.09	-0.95	0.11	0.44	0.09	0.31
A_06_P3856	|| biological process unknown || molecular function unknown || YIL056W || 1082568	1	0	-0.08	1.89	1.29	0.13	0.53	-0.03	-0.3	0.04	0.34	1.04	0.38
A_06_P7106	ARO7 || aromatic amino acid family biosynthesis || chorismate mutase activity || YPR060C || 1082569	1	-1.42	-1.89	-2.31	-2.41	-2.48	-2.61	-0.04	0.46	-0.03	-0.17	-0.89	-1.39
A_06_P3336	SPT6 || regulation of transcription, DNA-dependent* || RNA polymerase II transcription elongation factor activity || YGR116W || 1082570	1	0.11	0.21	0.23	0.14	-0.65	-0.04	0.36	0.04	-0.47	-0.35	-0.45	-0.49
A_06_P4735	PCK1 || gluconeogenesis || phosphoenolpyruvate carboxykinase (ATP) activity || YKR097W || 1082571	1			8.07	5.61	6.64			0.47
A_06_P5936	IBD2 || mitotic spindle checkpoint || molecular function unknown || YNL164C || 1082572	1	-2.21	-1.66	-1.56	-0.5	0.09	0.3	-0.1	-0.34	-1.72	-1.11	-0.39	0.3
A_06_P2242	MET32 || sulfur amino acid metabolism || DNA binding* || YDR253C || 1082573	1	-0.87	1.07	0.71	1.32	1.14	1.78	0.36	1.17	0.59	0.1	-0.22	-0.1
A_06_P3346	|| biological process unknown || molecular function unknown || YGR125W || 1082574	1	-0.43	-0.74	-1.44	-2.62	-2.71	-1.94	1.35	-1.77	0.46	0.13	-0.03	-0.19
A_06_P7048	|| biological process unknown || molecular function unknown || YPR003C || 1082575	1	1.15	1.16	1.84	1.7	1.49	0.9	0.44	0.67	0.82	0.98	0.56	0.55
A_06_P3947	RPL40A || protein biosynthesis* || structural constituent of ribosome* || YIL148W || 1082576	1	-0.48	-1.74	-4.13	-3.9	-3.75	-1.88	-0.38	0.69	-2.52	-3.67	-2.42	-1.29
A_06_P4986	DPH5 || peptidyl-diphthamide biosynthesis from peptidyl-histidine || diphthine synthase activity || YLR172C || 1082578	1	-1.36	-1.79	-2.03	-1.59	-1.88	-0.41	-0.27	-0.54	-1.94	-2.16	-1.01	-0.82
A_06_P4433	PAN3 || DNA repair* || poly(A)-specific ribonuclease activity || YKL025C || 1082579	1	0.6	0.59	0.73	0.99	0.85	0.36	0.06	0.66	0.62	0.55	0.43	0.18
A_06_P2545	|| transport || transporter activity || YEL006W || 1082580	1	-0.19	-0.33	-0.09	0	-0.88	-0.04	0.19	-0.34	1.04	0.94	0.38	0.02
A_06_P2517	AGE1 || ER to Golgi transport* || ARF GTPase activator activity || YDR524C || 1082582	1	-0.75	-0.52	-0.1	-0.71	-1.2	-0.83	-0.32	-1.32	-0.1	-0.06	-0.24	-0.74
A_06_P6955	APL5 || vesicle-mediated transport* || protein binding || YPL195W || 1082583	1	0.15	0.11	0.03	-0.43	-0.3	-0.16	-0.05	-0.63	-0.42	-0.19	-0.56	-0.13
A_06_P1776	SIT4 || cell wall organization and biogenesis* || protein serine/threonine phosphatase activity || YDL047W || 1082584	1	-0.49	-0.48	-0.18	-0.62	-2.08	-0.83	-0.28	-1.46	-1.03	-0.88	-0.89	-1.5
A_06_P3922	SIM1 || microtubule cytoskeleton organization and biogenesis || molecular function unknown || YIL123W || 1082585	1	-0.89	-0.61	-1.67	-3.23	-2.67	-2.39	0.84	-1.63	-0.64	0.18	0.12	-0.31
A_06_P7067	AGC1 || L-aspartate transport* || L-glutamate transporter activity* || YPR021C || 1082586	1	1.22	1.41	1.25	0.26	1.64	0.72	0.37	-0.17	0.47	0.79	0.8	1.44
A_06_P5353	TEM1 || signal transduction* || protein binding* || YML064C || 1082587	1	-0.01	-0.13	-0.59	-0.57	-1.79	-1.74	-0.31	0.39	0.14	0.25	-0.05	-1.1
A_06_P2885	SNZ3 || thiamin biosynthesis* || protein binding || YFL059W || 1082588	1	0.2	0.26	0	0.68	0.88	0.57	0.05	0.18	0.05	-0.17	0.18	0.85
A_06_P4715	|| biological process unknown || molecular function unknown || YKR077W || 1082589	1	-0.52	-0.04	-1.21	-1.08		-0.8	0.16	0.55	0.65	0.39	0.28	0.09
A_06_P6925	|| biological process unknown || molecular function unknown || YPL166W || 1082590	1								0.07			1.58
A_06_P2911	|| biological process unknown || molecular function unknown || YFR016C || 1082591	1	0.94	1.41	1.48	0.81	0.3	0.98	0.41	0.3	0.79	0.97	0.68	0.82
A_06_P4751	|| biological process unknown || molecular function unknown || YLL007C || 1082592	1	0.5	0.66	1.24	1.12	0.92	0.3	0.21	0.1	0.5	0.47	0.24	0.01
A_06_P4238	|| biological process unknown || hydrolase activity, hydrolyzing O-glycosyl compounds || YJL216C || 1082593	1	0.57	0.33	0.19	0.19	0.4	0.59	-0.03	0.04	0.33	0.08	0.04	-0.45
A_06_P2482	SLD5 || DNA-dependent DNA replication || DNA binding || YDR489W || 1082594	1	0.32	-0.35	-0.1	0.52	-0.21	-0.24	-0.36	0.58	0.63	0.48	0.33	-0.12
A_06_P3263	|| biological process unknown || transaldolase activity || YGR043C || 1082595	1	4	5.98	7.43	6.64	6.64	6.64	0.09	1.26	3.24	3.42	5.17	6.09
A_06_P2311	ASP1 || asparagine catabolism || asparaginase activity || YDR321W || 1082596	1	-2.09	-3	-4.14	-2.91	-3	-2.73	-0.57	-0.26	-2.83	-3.29	-2.44	-2.16
A_06_P2599	PCM1 || N-acetylglucosamine biosynthesis || phosphoacetylglucosamine mutase activity || YEL058W || 1082597	1	0.13	0.03	-0.7	-1.26	-2.14	-1.81	-0.02	-0.04	0.95	0.92	0.58	1.21
A_06_P2060	SNF11 || chromatin remodeling || general RNA polymerase II transcription factor activity || YDR073W || 1082598	1	0.74	0.67	1.6	0.47	1.42	1.39	0.38	-0.49	0.27	0.34	0.07	-0.22
A_06_P1936	TRM8 || tRNA methylation || protein binding* || YDL201W || 1082599	1	-2.6	-2.3	-3.02	-2	-1.22	-1.29	-0.38	-0.33	-3.69	-3.69	-2.22	-1.5
A_06_P6045	TOF1 || mitotic sister chromatid cohesion* || molecular function unknown || YNL273W || 1082600	1	-1.32	-1.5	-2.53	-2.21	-2.59	-1.25	0.05	0.14	-0.64	-0.76	-0.64	-0.17
A_06_P6456	ARF3 || actin cytoskeleton organization and biogenesis* || GTPase activity || YOR094W || 1082601	1	-0.25	-0.49	-0.27	-0.41	-0.87	-1.15	-0.29	0.07	-0.22	-0.37	-0.7	-0.62
A_06_P3075	PRP43 || U2-type spliceosome disassembly || RNA splicing factor activity, transesterification mechanism* || YGL120C || 1082602	1	-3.9	-3.91	-5.73	-5.39	-5.37	-4.6	-0.18	-1.67	-5.27	-5.48	-4.02	-3.42
A_06_P5663	MRE11 || DNA repair* || protein binding* || YMR224C || 1082603	1	0.25	0.27	0.71	0.93	0.16	0.38	0.06	-0.1	-0.2	0.06	0.27	0.28
A_06_P6639	HEM4 || heme biosynthesis || uroporphyrinogen-III synthase activity || YOR278W || 1082604	1	0.4	0.33	0.27	0.22	-0.26	-0.81	0.22	0.77	0.6	0.37	-0.03	-0.19
A_06_P1350	|| || || YBR099C || 1082605	1	-1.14	0.48	1	0.53	1.54	2.12	-0.09	-0.53	-0.47	0.09	0.84	1.58
A_06_P1785	MBP1 || regulation of progression through cell cycle* || DNA binding* || YDL056W || 1082606	1	0.23	0.4	0.7	0.97	1.82	1.07	0.29	0.88	0.98	1.11	0.97	0.64
A_06_P2770	|| biological process unknown || molecular function unknown || YER137C || 1082607	1	-1.32	-1.5	-0.97	-0.4	-0.07	-0.25	-0.7	-0.35	-1.71	-1.8	-1.09	-0.32
A_06_P2733	UBC6 || protein monoubiquitination* || ubiquitin conjugating enzyme activity || YER100W || 1082608	1	-0.28	-0.47	-1.08	-0.61	0.39	-0.14	-0.1	0.28	0.72	0.74	0.38	0.83
A_06_P6859	ATG21 || autophagy* || phosphoinositide binding || YPL100W || 1082609	1	1.32	1.18	1.83	1.86	1.77	1.45	0.23	0.71	1.06	1.09	0.88	0.87
A_06_P4680	UTH1 || mitochondrion organization and biogenesis* || molecular function unknown || YKR042W || 1082610	1	-0.71	-1.46	-1.96	-2.63	-3.53	-2.73	0.01	-1.15	-0.7	-0.88	-1.13	-1.69
A_06_P4160	YUR1 || protein amino acid N-linked glycosylation* || mannosyltransferase activity || YJL139C || 1082611	1	0.1	0.15	0.16	-0.04	-0.44	-0.19	0.06	-0.37	-0.2	-0.58	-0.54	-0.64
A_06_P3363	BTN2 || intracellular protein transport* || molecular function unknown || YGR142W || 1082612	1	0.32	2.39	3.12	3.41	3.73	3.92	0.34	1.8	0.99	1.21	2.35	3.02
A_06_P4822	TEN1 || telomere capping || molecular function unknown || YLR010C || 1082613	1			0.38	2		2.91		0.94	-0.2	-0.25	0.38	1.15
A_06_P4167	IDS2 || meiosis || molecular function unknown || YJL146W || 1082614	1	0.2	0.17	0.48	0.61	0.52	0.46	-0.13	-0.4	1	0.74	0.68	0.16
A_06_P4041	MPS3 || mitotic sister chromatid cohesion* || molecular function unknown || YJL019W || 1082615	1	-0.95	-1.47	-0.01	-2.15	-1.86	-1.44	0.21	-2.07	-1.67	-1.41	-1.5	-1.78
A_06_P3924	KGD1 || tricarboxylic acid cycle* || oxoglutarate dehydrogenase (succinyl-transferring) activity || YIL125W || 1082616	1	1.42	2.32	3.46	2.72	2.28	1.7	0.07	-0.01	0.8	0.75	0.89	0.46
A_06_P3250	POP6 || rRNA processing* || ribonuclease P activity* || YGR030C || 1082617	1	0.13	-0.32	0.37	1	1.46	0.95	0.82	-0.04	-1.18	-0.86	0.03	0.48
A_06_P3514	MAL12 || maltose catabolism || alpha-glucosidase activity || YGR292W || 1082618	1											-0.68
A_06_P1663	BUD5 || pseudohyphal growth* || signal transducer activity* || YCR038C || 1082619	1	1.03	0.44	0.79	1.39	0.49	0.55	0.36	-0.06	0.62	0.74	0.46	-0.19
A_06_P3967	|| not yet annotated || not yet annotated || YIL168W || 1082620	1	-0.37	-0.23	-0.38	-0.59	-1.2	-0.1	0.41	-1.17	1.55	1.55	0.94	0.69
A_06_P3819	FAF1 || processing of 20S pre-rRNA || molecular function unknown || YIL019W || 1082621	1	-3.12	-5.03	-4.06	-2.23	-2.24	-1.51	-0.76	-2.29	-5.06	-5.14	-2.5	-1.97
A_06_P4418	CCE1 || DNA recombination || endodeoxyribonuclease activity || YKL011C || 1082622	1	0.6	0.43	0.99	0.13	0.23	-0.81	0.1	0.31	0.31	0.27	-0.14	-0.45
A_06_P2322	GPI8 || attachment of GPI anchor to protein || GPI-anchor transamidase activity || YDR331W || 1082623	1	-0.44	-0.79	-0.99	-1.71	-1.25	-1.49	0.21	-0.65	-0.44	-0.45	-0.8	-1.03
A_06_P3488	FOL2 || folic acid and derivative biosynthesis || GTP cyclohydrolase I activity || YGR267C || 1082624	1	0.13	-0.43	-0.08	0.23	0.46	0.26	-0.2	0.24	-0.41	-0.55	-0.33	0.06
A_06_P2416	CAD1 || positive regulation of transcription from RNA polymerase II promoter* || RNA polymerase II transcription factor activity || YDR423C || 1082626	1	1.46	1.07	2.28	2.19	1.37	1.28	0.12	0.5	1.14	1.06	0.71	0.2
A_06_P5229	CTR3 || copper ion import || copper uptake transporter activity || YLR411W || 1082627	1	0.46	0.36	0.15	0.57	0.71	-0.18	-0.1	0.58	0.12	-0.17	0.24	-0.53
A_06_P6306	SKM1 || protein amino acid phosphorylation* || protein serine/threonine kinase activity || YOL113W || 1082628	1	1.3	0.71	0.46	0.19	0.26	-0.06	0.14	0.81	1.26	1.29	0.84	1.5
A_06_P1238	PKC1 || cell wall organization and biogenesis* || protein kinase C activity || YBL105C || 1082629	1	0.34	0.3	0.71	0.25	0.01	0.18	0.23	-0.76	-0.03	-0.05	-0.61	-0.31
A_06_P3894	PRK1 || protein amino acid phosphorylation* || protein serine/threonine kinase activity || YIL095W || 1082630	1	0.35	0.43	0.64	0.71	0.66	0.14	0.46	0.43	0.32	0.32	-0.2	-0.35
A_06_P1575	KCC4 || protein amino acid phosphorylation* || protein kinase activity || YCL024W || 1082632	1	-1.47	-1.42	-2.44	-1.53	-1.19	-0.44	-0.14	0.82	0.13	-0.25	-0.24	0.36
A_06_P6020	RPA49 || transcription from RNA polymerase I promoter || DNA-directed RNA polymerase activity || YNL248C || 1082633	1	-4.53	-4.12	-5.18	-5.49		-4.36	-0.17	-2.1	-6.07	-6.64	-4.71	-4.33
A_06_P3005	|| biological process unknown || molecular function unknown || YGL050W || 1082635	1	-0.63	-0.87	-1.1	-1.09	-0.99	-1.18	-0.09	-0.41	-0.06	-0.16	-0.3	-0.36
A_06_P3882	|| coenzyme A biosynthesis || phosphopantothenate-cysteine ligase activity || YIL083C || 1082636	1	-0.3	-0.51	0.87	1.44	1.59	0.58	-0.02	-0.65	-1.34	-1.12	-0.77	-0.21
A_06_P6007	|| || || YNL235C || 1082637	1	-0.13	-0.2	-0.09				0.14				-0.5
A_06_P1984	|| || || YDL247W-A || 1082638	1	0.03		1.08	1.34			0.05	0.53			1.04
A_06_P3851	MMF1 || mitochondrial genome maintenance* || molecular function unknown || YIL051C || 1082639	1	0.46	0.74	-0.3	0.2	-0.41	-0.41	-0.14	0.75	1	0.8	0.61	0.06
A_06_P5909	SRV2 || cytoskeleton organization and biogenesis* || cytoskeletal protein binding* || YNL138W || 1082640	1	0.74	1.06	0.34	-0.2	-0.07	-0.78	0.27	0.68	0.54	0.44	0.18	-0.39
A_06_P5101	CTS1 || cytokinesis, completion of separation* || endochitinase activity || YLR286C || 1082643	1	0.37	1.13	0.38	-0.23	-2.54	-1.03	0.01	-0.86	0.29	0.07	0.02	-0.07
A_06_P7150	PRE2 || ubiquitin-dependent protein catabolism || endopeptidase activity || YPR103W || 1082644	1	0.73	1.01	0	0.04	-0.13	0.02	0.09	0.99	0.95	0.67	0.41	-0.24
A_06_P5226	|| biological process unknown || molecular function unknown || YLR408C || 1082645	1	2.12	1.63	1.47	2.96	3.29	1.72	0.2	3.06	2.44	2.2	1.81	2.05
A_06_P2729	SHC1 || sporulation (sensu Fungi)* || enzyme activator activity || YER096W || 1082647	1	1.74	2.07	3.74	3.56	3.29	3.75	-0.07	-0.35	1.98	1.93	2.43	2.96
A_06_P3094	|| biological process unknown || molecular function unknown || YGL139W || 1082648	1	-0.8	-1.06	-0.34	-0.24	-0.88	0.04	-0.09	-1.23	-1.1	-0.8	-0.62	-1.3
A_06_P6037	IST1 || protein biosynthesis || translation initiation factor activity || YNL265C || 1082649	1	1.3	1.31	1.69	1.69	1.26	1.3	0.3	1.01	2.21	2.32	1.49	1.2
A_06_P2684	FCY2 || purine transport* || cytosine-purine permease activity || YER056C || 1082650	1	-3.3	-3.11	-3.97	-4.03	-4.45	-3.85	-0.17	-1.17	-2.17	-2.07	-1.78	-1.4
A_06_P6987	ALG5 || protein amino acid N-linked glycosylation || dolichyl-phosphate beta-glucosyltransferase activity || YPL227C || 1082651	1	-1.32	-1.52	-2.9	-3.28	-3.22	-3.73	-0.15	-0.15	-0.54	-0.51	-0.76	-1.43
A_06_P6750	PHR1 || photoreactive repair || deoxyribodipyrimidine photo-lyase activity || YOR386W || 1082652	1	3.31	2.9	3.05	2.48	3.92	2.06	0.58	1.34	3.11	2.97	2.09	3.05
A_06_P6136	|| || || YNR025C || 1082653	1	0.58	-0.27	-0.67				-0.04
A_06_P1903	UGX2 || biological process unknown || molecular function unknown || YDL169C || 1082654	1	3.88	3.69	5.21	4.25	4.05	4.92	1.13	1.4	3.95	3.99	3.08	3.27
A_06_P4577	MCD4 || GPI anchor biosynthesis* || molecular function unknown || YKL165C || 1082655	1	-1.53	-1.62	-2.6	-2.87	-1.64	-2.37	0.36	-0.9	-0.93	-0.98	-0.77	-0.87
A_06_P2621	|| biological process unknown || helicase activity || YEL077C || 1082656	1	0.79	0.59	0.66	0.04	0.68	2.15	0.3	-1.04	-0.11	-0.06	0.11	1.87
A_06_P6937	CBC2 || nuclear mRNA splicing, via spliceosome || RNA cap binding || YPL178W || 1082657	1	0.21	-0.12	0.06	0.66	0.49	0.17	0.08	1.1	0.47	0.4	0.17	-0.05
A_06_P6724	PDE2 || cAMP-mediated signaling || cAMP-specific phosphodiesterase activity || YOR360C || 1082658	1	-0.23	-0.72	-0.54	-0.93	-1.09	-1.77	-0.24	-0.41	-0.09	-0.26	-0.65	-1.31
A_06_P4900	GAA1 || attachment of GPI anchor to protein || GPI-anchor transamidase activity || YLR088W || 1082659	1	-0.34	-0.31	-0.38	-0.01	-0.26	-0.56	0.21	0.35	0.01	0.13	0.07	-0.16
A_06_P5462	ARP9 || chromatin remodeling || general RNA polymerase II transcription factor activity || YMR033W || 1082660	1	-0.51	-0.47	-0.94	-1.98	-1.84	-1.92	0.1	-0.66	-0.85	-0.65	-1.27	-1.28
A_06_P6097	FIG4 || cellular morphogenesis during conjugation with cellular fusion || polyphosphoinositide phosphatase activity || YNL325C || 1082661	1	0.33	0.2	0.56	1.07	1.01	0.8	-0.07	0.56	0.43	0.44	0.45	0.53
A_06_P1156	RPL19B || protein biosynthesis || structural constituent of ribosome || YBL027W || 1082662	1	-1.95	-2.27	-4.22	-5.13	-4.47	-2.83	0.67	-1.33	-3.47	-4.18	-3.36	-2.61
A_06_P1090	|| biological process unknown || molecular function unknown || YAL064W-B || 1082664	1			0.18
A_06_P1490	ABD1 || mRNA capping || mRNA (guanine-N7-)-methyltransferase activity || YBR236C || 1082665	1	0.57	0.45	0.52	0.65	0.71	0.31	0.26	0.28	0.52	0.38	0.2	0.17
A_06_P6578	RUD3 || ER to Golgi transport || molecular function unknown || YOR216C || 1082666	1	-0.49	-0.69	-1.02	-1.46	-1.22	-1.61	-0.01	0.13	-0.28	-0.07	-0.46	-0.57
A_06_P3641	DYS1 || hypusine biosynthesis from peptidyl-lysine || transferase activity, transferring alkyl or aryl (other than methyl) groups || YHR068W || 1082668	1	-1.81	-2.14	-3.9	-3.48	-4.15	-3.6	-0.49	0.14	-1.85	-2.3	-2.07	-2.35
A_06_P3419	|| MAPKKK cascade || transferase activity || YGR198W || 1082669	1	-0.26	-0.21	-0.4	-1	-1	-1.7	-0.04	0.02	-0.61	-0.38	-0.55	-0.99
A_06_P3772	MDM31 || mitochondrion organization and biogenesis* || molecular function unknown || YHR194W || 1082670	1	1.13	1.4	2.02	1.77	1.03	1.61	0.15	0.09	0.77	0.82	0.5	0.46
A_06_P1891	|| || || YDL158C || 1082671	1	-0.79	-1.65	-2.48	-2.34	-1.5	-1.78	-0.15	0.25	-1.37	-1.64	-1.24	-1.06
A_06_P2290	CFT1 || mRNA polyadenylylation* || RNA binding || YDR301W || 1082672	1	-0.36	-0.18	-0.5	-0.63	-0.19	-0.64	0.01	0.11	-0.5	-0.38	-0.48	-0.19
A_06_P4514	LAP4 || vacuolar protein catabolism || aminopeptidase I activity || YKL103C || 1082673	1	2.47	3.28	1.43	0.18	-0.03	-0.41	0.74	1.03	4.08	3.7	2.75	2.89
A_06_P7117	|| biological process unknown || molecular function unknown || YPR071W || 1082674	1	-0.83	-0.53	-0.61	-0.76	-0.94	-1.16	-0.24	-0.7	-0.8	-0.94	-1.23	-2.14
A_06_P2174	|| biological process unknown || molecular function unknown || YDR185C || 1082675	1	1.62	0.97	1.39	1.16	1.78	0.53	0.02	0.47	0.98	0.73	0.58	1.13
A_06_P6446	|| peroxisome organization and biogenesis || lipase activity || YOR084W || 1082676	1	0.21	0.35	1.51	2.26	3.21	2.5	0.13	-0.39	0.04	0.54	0.75	1.06
A_06_P2778	FTR1 || high affinity iron ion transport || iron ion transporter activity || YER145C || 1082677	1	-1.28	-1.69	-0.84	-1.94	-2.4	-2.2	-0.1	-0.61	-2.16	-1.47	-0.78	-0.29
A_06_P6531	|| || || YOR169C || 1082678	1		-0.52	-1.43	-1.52			-0.28	-0.27	-1.67	-1.76	-1.93	-1.98
A_06_P6660	MUM3 || spore wall assembly (sensu Fungi)* || acyltransferase activity || YOR298W || 1082679	1		-1.1	-0.46	0.5		0.39	-0.17	0.62	-0.27		0.07	0.43
A_06_P5812	COG6 || intra-Golgi transport || molecular function unknown || YNL041C || 1082680	1	-0.12	-0.39	-0.23	0.47	0.17	-0.2	-0.4	0.19	-0.08	-0.02	-0.09	-0.33
A_06_P4867	SPT8 || histone acetylation* || transcription cofactor activity || YLR055C || 1082681	1	-0.37	-0.27	-0.03	-0.96	-2.02	-1.23	0.27	-1.22	-1.19	-0.82	-0.69	-1.03
A_06_P2653	SMB1 || nuclear mRNA splicing, via spliceosome || RNA splicing factor activity, transesterification mechanism || YER029C || 1082682	1	-0.11	-0.23	0.2	-0.18	0.48	0.3	0.23	-0.22	-0.17	0.15	-0.32	-0.12
A_06_P6134	SNF12 || chromatin remodeling || general RNA polymerase II transcription factor activity || YNR023W || 1082683	1	0.18	-0.03	0.25	0.31	0.84	0.19	-0.09	0.41	0.28	0.55	0.44	0.42
A_06_P2927	SMC2 || mitotic sister chromatid segregation* || ATPase activity* || YFR031C || 1082684	1	-0.79	-0.89	-1.53	-1.57	-1.05	-1.91	-0.05	0.34	-0.9	-0.39	-0.42	0.02
A_06_P5515	|| biological process unknown || molecular function unknown || YMR086W || 1082685	1	1.29	1.23	1.67	0.78	0.52	0.8	0.84	-0.44	1.13	1.29	1.06	1.58
A_06_P1557	RER1 || ER to Golgi transport* || molecular function unknown || YCL001W || 1082686	1	0.19	-0.25	-0.76	-0.57	-0.14	-0.36	0.2	0.65	0.39	0.59	0.35	0.09
A_06_P3969	HXT12 || biological process unknown* || molecular function unknown* || YIL170W || 1082688	1		0.17	-0.19				0.15
A_06_P3582	VPS29 || retrograde transport, endosome to Golgi || molecular function unknown || YHR012W || 1082689	1	0.12	0.12	-0.44	-0.52	-0.49	-0.6	0.14	0.48	0.93	0.85	0.3	-0.04
A_06_P3539	|| biological process unknown || molecular function unknown || YHL021C || 1082690	1	6.85	6.61	6.65	4.65	5.66	4.15	1.21	2.07	5.05	4.52	3.51	2.93
A_06_P4189	ERG20 || ergosterol biosynthesis* || dimethylallyltranstransferase activity* || YJL167W || 1082691	1	0.12	0.28	-0.72	-0.38	-0.16	-0.6	-0.05	0.65	0.51	0.24	0.23	0.12
A_06_P4264	ESS1 || negative regulation of transcription from RNA polymerase II promoter* || peptidyl-prolyl cis-trans isomerase activity* || YJR017C || 1082692	1	-0.18	0.13	-0.09	-0.18	-0.84	-0.48	-0.34	-0.6	-0.46	-0.44	-0.64	-0.68
A_06_P5050	|| || || YLR236C || 1082693	1	-0.04	-0.41	-0.63				-0.01
A_06_P3131	|| biological process unknown || molecular function unknown || YGL176C || 1082694	1	-0.11	-0.21	-0.02	-0.31	-0.35	0.15	0.03	-0.89	-0.56	-0.36	-0.67	-0.38
A_06_P1052	SNC1 || endocytosis* || v-SNARE activity || YAL030W || 1082695	1	1.12	1.42	1.13	2.54	2.24	1.66	0.08	2.03	2.22	2.1	1.94	1.89
A_06_P4478	NUP100 || mRNA-nucleus export* || structural molecule activity || YKL068W || 1082696	1	-2.36	-1.4	-1.17	-0.73	-1.12	-1.1	-0.47	-1.33	-2.65	-2.37	-1.9	-1.95
A_06_P5122	UBC12 || protein monoubiquitination* || ubiquitin conjugating enzyme activity || YLR306W || 1082697	1	0.71	0.45	0.46	1.39	1.45	0.37	-0.11	1.6	1.63	1.3	0.74	1.23
A_06_P6139	CPR8 || biological process unknown || peptidyl-prolyl cis-trans isomerase activity || YNR028W || 1082698	1	0.67	-0.33	-0.53	0.1	0	-0.59	-0.19	1.48	0.95	0.92	0.36	-0.57
A_06_P3484	|| biological process unknown || molecular function unknown || YGR263C || 1082699	1	0.33	0.26	0.2	1.27	0.34	0.42	-0.71	0.77	0.78	0.7	0.65	0.52
A_06_P4117	BCK1 || protein amino acid phosphorylation* || MAP kinase kinase kinase activity || YJL095W || 1082700	1	-0.44	-0.17	-0.19	0.01	0.26	0.41	0.02	-0.09	-0.34	-0.16	-0.11	-0.18
A_06_P6386	|| || || YOR024W || 1082701	1											-3.02
A_06_P3808	FAA3 || lipid metabolism* || long-chain-fatty-acid-CoA ligase activity || YIL009W || 1082703	1	-1.33	-1.18	-1.36	-0.63	-0.41	-0.37	-0.12	-0.34	-0.97	-0.82	-1.2	-1.6
A_06_P6035	YIF1 || ER to Golgi transport || molecular function unknown || YNL263C || 1082704	1	-0.09	-0.18	-0.45	-0.31	-0.68	-0.52	-0.41	0.26	0.63	0.48	0.15	-0.5
A_06_P5735	|| || || YMR294W-A || 1082705	1	0.21	0.23	-0.2	-1.09		-0.98	0.76	-0.18	-0.24		0.47	0.94
A_06_P2744	LSM4 || nuclear mRNA splicing, via spliceosome* || RNA binding || YER112W || 1082706	1	-0.28	-0.13	-0.05	-0.19	-0.44	-0.15	0.23	0.21	0.17	0.07	-0.23	-1.12
A_06_P4674	CAF4 || regulation of transcription, DNA-dependent || protein binding || YKR036C || 1082707	1	-1	-0.99	-0.87	-0.28	-0.37	-0.46	-0.5	-0.38	-1.19	-1.09	-1.02	-0.95
A_06_P4441	|| biological process unknown || molecular function unknown || YKL033W || 1082708	1	-0.97	-0.87	-1.42	-0.57	-0.5	-0.5	-0.32	-0.14	-1.36	-1.24	-0.79	-0.44
A_06_P7194	|| || || YPR146C || 1082709	1	0.3	0.19	0.34	0.49	0.79	0.06	-0.04	0.17	0.33	0.41	0.25	0.73
A_06_P7221	VPS4 || protein retention in Golgi* || ATPase activity || YPR173C || 1082710	1	-0.18	0.18	-0.37	-0.38	-0.77	-0.52	-0.02	0.3	0.12	0.15	0.06	0.08
A_06_P6239	|| biological process unknown || molecular function unknown || YOL048C || 1082711	1	2.8	2.61	3.82	3.03	3.58	3	0.75	1.38	3	2.82	2.19	2.17
A_06_P2158	SEC7 || ER to Golgi transport* || ARF guanyl-nucleotide exchange factor activity || YDR170C || 1082712	1	0.05	-0.17	-0.38	-0.26	-0.44	-0.82	0.26	0.26	0	0.12	-0.14	-0.42
A_06_P3949	MCM10 || DNA replication initiation* || chromatin binding || YIL150C || 1082714	1		-1.08	-1.36	-0.69	0.2	0.32	0.18	-1.58	-1.27	-0.69	-0.24	0.63
A_06_P6598	DFR1 || folic acid and derivative metabolism || dihydrofolate reductase activity || YOR236W || 1082715	1	-2.53	-3.11	-3.42	-2.26	-2	-1.78	-0.63	-1.18	-1.79	-1.72	-1.32	-0.9
A_06_P6929	DAP1 || sterol metabolism || heme binding || YPL170W || 1082716	1	0.89	1.14	0.77	1.32	1.33	1.5	-0.26	1.43	1.22	1.3	1.3	1.36
A_06_P5034	CCC1 || iron ion homeostasis* || molecular function unknown || YLR220W || 1082718	1	0.81	0.86	0.24	0.48	0.04	0.98	-0.29	-0.08	0.97	1.01	0.78	0.47
A_06_P1064	CLN3 || G1/S transition of mitotic cell cycle* || cyclin-dependent protein kinase regulator activity || YAL040C || 1082719	1	-0.2	0.44	0.04	-0.83		-1.23	0	-0.3	-0.06	-0.28	-0.48	-0.68
A_06_P5177	VPS38 || late endosome to vacuole transport || molecular function unknown || YLR360W || 1082720	1	0.67	0.68	0.77	0.95	-0.33	0.07	0.17	0.36	0.78	0.81	0.36	-0.41
A_06_P1010	AAP1 || ATP synthesis coupled proton transport || hydrogen-transporting ATP synthase activity, rotational mechanism || Q0080 || 1082721	1	-0.59	0.36	1.39	-1.69	2.5	2.77	0.18	-2.82	-0.84	0.92	0.04	1.34
A_06_P4240	|| biological process unknown || acetyltransferase activity || YJL218W || 1082722	1	1.04	0.23	-1.33	-0.54			0.24	2.2	1.37		0.08
A_06_P2765	PMD1 || sporulation || molecular function unknown || YER132C || 1082723	1	-1.13	-0.78	-0.91	-0.32	0.48	0.09	-0.35	0.28	-0.02	0.18	0.32	0.99
A_06_P1319	|| biological process unknown || molecular function unknown || YBR071W || 1082724	1	-0.34	-0.67	-0.27	0.02	-0.19	0.57	-0.1	-0.22	0.52	0.41	0.67	0.52
A_06_P6830	|| biological process unknown || molecular function unknown || YPL071C || 1082725	1	0.1	-0.03	0.04	0.58	1.01	0.46	0.49	1.19	0.83	0.9	0.44	1.02
A_06_P5861	RHO2 || cell wall organization and biogenesis* || GTPase activity* || YNL090W || 1082726	1	-0.52	-1.04	-1.64	-1.62	-2.05	-2.1	0.19	0.47	-0.24	-0.3	-0.48	-0.62
A_06_P4266	TES1 || fatty acid oxidation || acyl-CoA thioesterase activity || YJR019C || 1082727	1	0.91	1.45	2.44	2.46	2.44	2.39	0.45	-0.43	1.26	1.47	1.47	1.43
A_06_P6185	HXT17 || hexose transport || glucose transporter activity* || YNR072W || 1082728	1	1.8	1.28	0.18			0.44	0.42	0.19	0.44		0.16
A_06_P7063	DSS4 || secretory pathway || guanyl-nucleotide exchange factor activity* || YPR017C || 1082729	1	-0.65	-1.09	-0.87	-0.16	-0.67	-0.06	-0.48	-0.28	0	-0.2	-0.12	-0.04
A_06_P4254	|| biological process unknown || molecular function unknown || YJR008W || 1082730	1	3.77	3.9	4.92	4.69	6.42	5.66	1.06	2.41	4.15	4	3.64	4.44
A_06_P1709	FIG2 || cellular morphogenesis during conjugation with cellular fusion* || molecular function unknown || YCR089W || 1082731	1	0.19	-0.27	0.89	0.7	1.17	0.33	-0.12	-0.15	-0.3	-0.09	0	-0.49
A_06_P1336	IST2 || response to osmotic stress || molecular function unknown || YBR086C || 1082732	1	0.3	0.41	0.69	0.09	-0.32	0.24	0.03	-0.25	0.01	0.24	-0.06	-0.64
A_06_P2250	EXG2 || cell wall organization and biogenesis || glucan 1,3-beta-glucosidase activity || YDR261C || 1082733	1	-0.39	-0.61	-1.38	-2.14	-2.02	-2.01	0	-0.52	-0.4	0.03	-0.37	-0.98
A_06_P2682	GIP2 || protein amino acid dephosphorylation || protein phosphatase regulator activity || YER054C || 1082734	1		4.84		4.24		5.38		1.82	3.34		3.06
A_06_P1332	RPL19A || protein biosynthesis || structural constituent of ribosome || YBR084C-A || 1082736	1	-1.79	-2.03	-3.92	-4.42	-3.62	-2.27	0.68	-1.13	-3.32	-4.2	-2.89	-2.11
A_06_P3063	|| biological process unknown || molecular function unknown || YGL108C || 1082737	1	0.21	0.49	0.61	0.37	0.38	0.18	0.21	0.2	0.66	0.71	0.17	0.25
A_06_P5517	VBA1 || basic amino acid transport || basic amino acid permease activity || YMR088C || 1082738	1	-1.95	-2.08	-2.33	-2.17	-3.06	-2.23	0.75	-0.07	1.34	1	0.58	-0.1
A_06_P2122	|| biological process unknown || molecular function unknown || YDR134C || 1082739	1	1.16	1.41	0.52	-1.2	0.29	-0.12	0.17	-0.89	1.21	1.11	0.96	1.49
A_06_P3531	|| biological process unknown || molecular function unknown || YHL013C || 1082740	1	-1.5	-2.1	-1.91	-0.99	-1.31	-1.67	-0.5	-0.43	-1.69	-1.43	-0.86	-0.64
A_06_P6256	MET22 || sulfate assimilation* || 3'(2'),5'-bisphosphate nucleotidase activity || YOL064C || 1082741	1	-1.26	-0.74	-2.05	-1.97	-1.92	-1.9	0.19	0.18	-0.24	-0.45	-1.33	-1.71
A_06_P2392	HPT1 || purine nucleotide biosynthesis || hypoxanthine phosphoribosyltransferase activity || YDR399W || 1082742	1	-2.55	-2.8	-4.8	-3	-3.31	-2.45	-0.26	-0.52	-1.46	-1.49	-1	-0.48
A_06_P1077	|| biological process unknown || molecular function unknown || YAL053W || 1082743	1	-0.38	-0.13	0.07	-0.42	-1.54	-0.39	-0.18	-0.44	0.15	0.19	0.47	0.69
A_06_P1352	FES1 || protein biosynthesis || adenyl-nucleotide exchange factor activity || YBR101C || 1082744	1	-0.27	0.59	1.23	1.76	2.3	1.84	0.27	0.94	0.26	0.41	0.94	1.43
A_06_P1219	RPL23A || protein biosynthesis || structural constituent of ribosome || YBL087C || 1082745	1	-1.63	-2.07	-3.24	-4.16	-3.5	-2.73	0.61	0.41	-2.82	-3.68	-2.97	-2
A_06_P1605	SPB1 || processing of 27S pre-rRNA || S-adenosylmethionine-dependent methyltransferase activity* || YCL054W || 1082746	1	-5.05	-3.66	-4.72	-3.89	-3.55	-2.22	-0.58	-1.14	-5.07	-5.22	-2.9	-1.94
A_06_P1808	MRK1 || protein amino acid phosphorylation* || glycogen synthase kinase 3 activity || YDL079C || 1082747	1	5.74		5.31	3.76		3.99		0.28			1.15	0.54
A_06_P5615	|| biological process unknown || molecular function unknown || YMR178W || 1082748	1	0.38	0.37	-0.1	0.14	0.36	-0.21	0.17	0.41	1.28	1.06	0.64	0.25
A_06_P2837	IES1 || chromatin remodeling || molecular function unknown || YFL013C || 1082749	1	0.09	0.14	0.73	0.17	0.78	0.65	0.02	-0.9	0.19	0.19	0.02	0.09
A_06_P2359	|| biological process unknown || molecular function unknown || YDR367W || 1082750	1	0.01	-0.16	-0.16	0.67	1.67	-0.01	-0.07	1.01	0.76	0.71	0.54	1.01
A_06_P6181	|| biological process unknown || molecular function unknown || YNR068C || 1082751	1	1.25	1.23	2.22	2.53	2.02	1.78	0.73	1.58	2.38	2.23	2.19	2.58
A_06_P4056	TAD2 || tRNA modification || tRNA specific adenosine deaminase activity || YJL035C || 1082752	1	-1.44	-1.38	-2.12	-1.72	-1.28	-1.82	-0.3	0.13	-1.34	-1.6	-1.37	-1.08
A_06_P2114	SWF1 || spore wall assembly (sensu Fungi) || molecular function unknown || YDR126W || 1082753	1		-0.23	0.25	0.84		0.4	-0.19	-0.45	-0.5	-0.68	-0.25	-1.06
A_06_P5479	FAR3 || cell cycle arrest in response to pheromone || molecular function unknown || YMR052W || 1082754	1	0.84	0.32	0.98	1.69	1.95	1.05	-0.18	0.91	1.44	1.15	0.9	0.69
A_06_P3785	SET5 || biological process unknown || molecular function unknown || YHR207C || 1082755	1	0.29	-0.01	-0.03	0.15	0.41	0.03	-0.25	0.41	0.95	1.3	0.79	0.69
A_06_P2602	PRB1 || sporulation* || serine-type endopeptidase activity || YEL060C || 1082757	1	1.57	3.25	3.46	0.57	1.58	1.75	1.26	-1.19	3.56	3.71	3.12	3.12
A_06_P2687	PET117 || cytochrome c oxidase complex assembly || molecular function unknown || YER058W || 1082758	1	2.15	3.33	2.58	1.64	2.13	1.34	0.42	1.77	1.79	1.85	1.28	1.65
A_06_P7134	VPS69 || || || YPR087W || 1082759	1	0.29	-0.31	-0.34	-0.79	-0.09	-0.66	0.4	-0.27	-0.84	-0.52	-0.52	0.03
A_06_P5665	|| metabolism || oxidoreductase activity, acting on the aldehyde or oxo group of donors, NAD or NADP as acceptor || YMR226C || 1082760	1	0.51	0.8	-0.68	-0.09	-0.16	-0.53	0.27	0.92	1.67	1.48	1.11	1.54
A_06_P3960	|| biological process unknown || molecular function unknown || YIL161W || 1082761	1	0.22	-0.01	0.51	0.4	0.2	0.28	0.09	-0.06	-0.44	-0.29	-0.41	-0.28
A_06_P4016	YPS6 || biological process unknown || aspartic-type endopeptidase activity || YIR039C || 1082762	1	2.92	3.23	3.4	3.42	3.37	2.08	0.17	1.72	2.76	2.18	1.85	1.83
A_06_P4672	|| || || YKR035C || 1082763	1	0.62	0.01	-0.11	0	0.35	-0.4	-0.12	0.38			-0.3	0.15
A_06_P3100	TIP20 || retrograde transport, Golgi to ER || molecular function unknown || YGL145W || 1082764	1	-0.5	-0.25	0.13	0.14	-0.43	-0.17	-0.13	-0.4	-0.74	-0.57	-0.73	-1.14
A_06_P2153	TRM82 || tRNA methylation || protein binding* || YDR165W || 1082765	1	-2.74	-3.86	-4.82	-4.25		-3.84	-0.31	-1.8	-4.63	-5.07	-4.03	-3.8
A_06_P2179	RVB1 || regulation of transcription from RNA polymerase II promoter* || ATPase activity || YDR190C || 1082766	1	-1.19	-1.01	-1.9	-1.41	-1.65	-1.23	-0.13	0.13	-1.37	-1.27	-1.02	-1.32
A_06_P3070	SNF4 || regulation of transcription from RNA polymerase II promoter* || protein kinase activator activity || YGL115W || 1082767	1	1.4	1	0.87	1.12	0.82	0.06	0.38	1.41	1.05	1	0.74	0.7
A_06_P2145	|| || || YDR157W || 1082768	1		-1.11	-1.5			-0.74	-0.53	-1.25			-1.12
A_06_P7104	YMC1 || transport || transporter activity || YPR058W || 1082769	1	-1.14	-1.82	-2.91	-1.3	-1.61	-1.92	-0.14	0.2	0.55	0.26	0.03	-0.09
A_06_P5602	MLH1 || meiotic recombination || DNA binding* || YMR167W || 1082771	1	-0.11	-0.23	-0.01	-0.08		-1.3	-0.08	-0.41	0.16	0.03	-0.46	-0.82
A_06_P5874	MET4 || positive regulation of transcription from RNA polymerase II promoter* || transcription coactivator activity || YNL103W || 1082772	1	-0.48	-0.26	0.54	1.12	1.06	1.01	-0.35	-0.02	-0.05	0.03	0.12	0.41
A_06_P5825	VAC7 || vacuole inheritance* || enzyme regulator activity || YNL054W || 1082773	1	0.11	0.23	0.43	0.94	1.27	1.24	0.15	-0.02	0.52	0.71	0.81	1.13
A_06_P5028	FRE1 || iron ion transport* || ferric-chelate reductase activity || YLR214W || 1082774	1	-1.07	-0.35	-0.16	-0.46		-1.26	-0.3	0.13	-0.08	0.03	-0.36	-0.88
A_06_P5723	YKU70 || chromatin assembly or disassembly* || RNA binding* || YMR284W || 1082775	1	1.92	1.59	1.41	1.57	2.12	1.82	0.04	0.72	1.63	1.37	1.2	0.68
A_06_P1497	ALG7 || protein amino acid N-linked glycosylation || UDP-N-acetylglucosamine-dolichyl-phosphate N-acetylglucosaminephosphotransferase activity || YBR243C || 1082776	1	-0.49	-0.55	-1.15	-2.09	-1.85	-1.75	-0.13	0.1	0.45	0.75	0.43	-0.28
A_06_P6777	CTF19 || chromosome segregation* || protein binding || YPL018W || 1082777	1									-1.28
A_06_P4074	PEP8 || protein retention in Golgi* || molecular function unknown || YJL053W || 1082778	1	1.27	0.98	1.54	1.6	0.65	0.57	-0.01	0.71	1.02	0.92	0.57	0.1
A_06_P6717	SOG2 || cellular morphogenesis during vegetative growth || molecular function unknown || YOR353C || 1082779	1	0.11	0.52	0.91	0.96	0.35	0.85	0.23	0.12	-0.28	-0.15	-0.22	-0.39
A_06_P3355	CAF130 || regulation of transcription from RNA polymerase II promoter || molecular function unknown || YGR134W || 1082780	1	-0.29	0.21	0.34	0.3	0.43	1.14	0.13	-0.82	-0.37	-0.09	-0.23	0.09
A_06_P4594	PRS1 || histidine biosynthesis* || ribose phosphate diphosphokinase activity || YKL181W || 1082781	1	-1.34	-1.75	-2.65	-2.43	-1.92	-1.8	-0.22	-0.84	-3	-3	-2.13	-1.46
A_06_P5736	|| biological process unknown || molecular function unknown || YMR295C || 1082783	1	0.11	0.39	-0.3	-1.57	-0.8	-0.98	0.59	-0.61	0.07	0.42	0.76	1.36
[truncated: 3,824 more rows]
