# Supplementary material for: Coordinated Concentration Changes of Transcripts and Metabolites in Saccharomyces cerevisiae
Source: PLoS Comput Biol. 2009 Jan 30;5(1):e1000270. doi: 10.1371/journal.pcbi.1000270 (PMC2614473; doi:10.1371/journal.pcbi.1000270)
Supplement: Dataset S3 — Literature study results. This table is a representation of the described blind literature study, in which the 764 top predictions (that were not in the gold standard) were scored together with 250 random gene-metabolite pairs. (0.25 MB XLS) [file pcbi.1000270.s003.xls]

## Sheet: Sheet1
Metabolite	Gene	GO	TF	KO	SDI	Total	predicted?	scored?
Methionine	MET3	1	2	1	1	5	1	1
Methionine	MET22	1	1	1	1	4	1	1
Methionine	MET10	1	1	1	1	4	1	1
Methionine	ADE3	1	1	0	1	3	1	1
Methionine	SAM4	1	0	0	1	2	1	1
Methionine	HOM2	1	0	0	1	2	1	1
valine	PDC5	1	0	0	1	2	1	1
Histidine	ILS1	1	0	0	1	2	1	1
Methionine	MIS1	1	0	0	1	2	1	1
Methionine	ARC1	1	0	0	1	2	1	1
Methionine	GCN3	0	0	0	1	1	1	1
Methionine	DPS1	1	0	0	0	1	1	1
Threonine	MET10	1	0	0	0	1	1	1
Methionine	HTS1	1	0	0	0	1	1	1
Histidine	FRS2	1	0	0	0	1	1	1
Glutamine	FRS2	1	0	0	0	1	1	1
Glutamine	MES1	1	0	0	0	1	1	1
Methionine	DED81	1	0	0	0	1	1	1
Glutamine	WRS1	1	0	0	0	1	1	1
Methionine	KTR1	0	1	0	0	1	1	1
Threonine	MIS1	1	0	0	0	1	1	1
Methionine	WRS1	1	0	0	0	1	1	1
Threonine	DPS1	1	0	0	0	1	1	1
Threonine	MET17	1	0	0	0	1	1	1
Threonine	ADE3	1	0	0	0	1	1	1
Threonine	MES1	1	0	0	0	1	1	1
Glutamine	DED81	1	0	0	0	1	1	1
Tryptophan	SLT2	0	0	1	0	1	1	1
Threonine	MET3	1	0	0	0	1	1	1
Methionine	RPG1	0	0	1	0	1	1	1
Glutamine	ASN1	1	0	0	0	1	1	1
Serine	KRS1	1	0	0	0	1	1	1
Glutamine	ASN2	1	0	0	0	1	1	1
Methionine	FUN12	0	0	1	0	1	1	1
Glutamine	PRO3	1	0	0	0	1	1	1
Glutamine	HTS1	1	0	0	0	1	1	1
Methionine	GRS1	1	0	0	0	1	1	1
Threonine	KRS1	1	0	0	0	1	1	1
Threonine	FRS1	1	0	0	0	1	1	1
Threonine	MET6	1	0	0	0	1	1	1
Threonine	MET14	1	0	0	0	1	1	1
Glutamine	CDC60	1	0	0	0	1	1	1
Methionine	BUD7	0	1	0	0	1	1	1
Threonine	SAH1	1	0	0	0	1	1	1
Glutamine	GRS1	1	0	0	0	1	1	1
Lysine	ASN2	1	0	0	0	1	1	1
Threonine	WRS1	1	0	0	0	1	1	1
Histidine	MIS1	1	0	0	0	1	1	1
Threonine	ASN2	1	0	0	0	1	1	1
Glutamine	PRO2	1	0	0	0	1	1	1
Glutamine	ARC1	1	0	0	0	1	1	1
Methionine	RVB2	0	1	0	0	1	1	1
Threonine	SAM4	1	0	0	0	1	1	1
Methionine	ERG4	0	0	0	1	1	1	1
Threonine	HTS1	1	0	0	0	1	1	1
Methionine	SUI2	0	0	0	1	1	1	1
Serine	ILS1	1	0	0	0	1	1	1
Methionine	THR4	1	0	0	0	1	1	1
Glutamine	PRO1	1	0	0	0	1	1	1
Glutamine	GDH1	1	0	0	0	1	1	1
Threonine	ALA1	1	0	0	0	1	1	1
Methionine	SES1	1	0	0	0	1	1	1
Methionine	TKL1	0	0	0	1	1	1	1
Methionine	SFB3	0	1	0	0	1	1	1
Methionine	FRS2	1	0	0	0	1	1	1
Methionine	HCR1	0	0	0	1	1	1	1
Methionine	ASN2	1	0	0	0	1	1	1
Threonine	DED81	1	0	0	0	1	1	1
Methionine	FRS1	1	0	0	0	1	1	1
Threonine	FRS2	1	0	0	0	1	1	1
Threonine	YNL247W	1	0	0	0	1	1	1
Methionine	TYS1	1	0	0	0	1	1	1
Glycine	MNN1	0	0	0	0	0	1	0
Threonine	SWD3	0	0	0	0	0	1	0
Methionine	SSB1	0	0	0	0	0	1	0
Glutamine	CLU1	0	0	0	0	0	1	0
Threonine	MRPL19	0	0	0	0	0	1	0
valine	RPS6B	0	0	0	0	0	1	0
Methionine	TEF4	0	0	0	0	0	1	0
Histidine	PRT1	0	0	0	0	0	1	0
valine	RPS14A	0	0	0	0	0	1	0
valine	ENO1	0	0	0	0	0	1	0
Glutamine	YBR261C	0	0	0	0	0	1	0
Methionine	SSH1	0	0	0	0	0	1	0
Histidine	TIF4631	0	0	0	0	0	1	0
Threonine	YOR277C	0	0	0	0	0	1	0
Threonine	ADE12	0	0	0	0	0	1	0
Threonine	CHS7	0	0	0	0	0	1	0
Threonine	RPL20A	0	0	0	0	0	1	0
Serine	RPL39	0	0	0	0	0	1	0
Methionine	CPR3	0	0	0	0	0	1	0
Serine	RPS16A	0	0	0	0	0	1	0
Threonine	MYO4	0	0	0	0	0	1	0
Threonine	AST1	0	0	0	0	0	1	0
Lysine	ZUO1	0	0	0	0	0	1	0
Glutamine	OST5	0	0	0	0	0	1	0
Threonine	HXT4	0	0	0	0	0	1	0
Methionine	SRM1	0	0	0	0	0	1	0
Threonine	EMP70	0	0	0	0	0	1	0
Threonine	IMD1	0	0	0	0	0	1	0
Threonine	MAD2	0	0	0	0	0	1	0
Histidine	YCR013C	0	0	0	0	0	1	0
Methionine	YER007C-A	0	0	0	0	0	1	0
Methionine	YOR277C	0	0	0	0	0	1	0
Lysine	GDH1	0	0	0	0	0	1	0
Threonine	ADH6	0	0	0	0	0	1	0
Serine	RPS17A	0	0	0	0	0	1	0
Serine	RPL19A	0	0	0	0	0	1	0
Methionine	GDH1	0	0	0	0	0	1	0
Threonine	CDC33	0	0	0	0	0	1	0
Methionine	STT3	0	0	0	0	0	1	0
Methionine	SUR4	0	0	0	0	0	1	0
Threonine	YBL081W	0	0	0	0	0	1	0
valine	BUD19	0	0	0	0	0	1	0
Glutamine	RRP3	0	0	0	0	0	1	0
Glutamine	YGR017W	0	0	0	0	0	1	0
valine	RPL39	0	0	0	0	0	1	0
Histidine	ADK1	0	0	0	0	0	1	0
Glutamine	FRS1	0	0	0	0	0	1	0
Methionine	SUC2	0	0	0	0	0	1	0
valine	RPL16B	0	0	0	0	0	1	0
valine	RPS23B	0	0	0	0	0	1	0
Serine	PDC5	0	0	0	0	0	1	0
Histidine	ARO4	0	0	0	0	0	1	0
Glutamine	SQT1	0	0	0	0	0	1	0
Serine	RPL13A	0	0	0	0	0	1	0
Methionine	NOP1	0	0	0	0	0	1	0
Methionine	PPX1	0	0	0	0	0	1	0
valine	RPL6B	0	0	0	0	0	1	0
Glutamine	ADE12	0	0	0	0	0	1	0
Threonine	YOR006C	0	0	0	0	0	1	0
Glutamine	SMI1	0	0	0	0	0	1	0
Threonine	FUN12	0	0	0	0	0	1	0
Methionine	JEM1	0	0	0	0	0	1	0
Threonine	HXT2	0	0	0	0	0	1	0
Methionine	MRS1	0	0	0	0	0	1	0
Serine	SPT14	0	0	0	0	0	1	0
Methionine	KTR3	0	0	0	0	0	1	0
Threonine	TIF34	0	0	0	0	0	1	0
Methionine	UTR2	0	0	0	0	0	1	0
Glutamine	ARO1	0	0	0	0	0	1	0
Histidine	YDR417C	0	0	0	0	0	1	0
Threonine	SSB1	0	0	0	0	0	1	0
Serine	PET122	0	0	0	0	0	1	0
Histidine	TEF4	0	0	0	0	0	1	0
Serine	RPS16B	0	0	0	0	0	1	0
Glutamine	YBR206W	0	0	0	0	0	1	0
Methionine	YPL103C	0	0	0	0	0	1	0
Methionine	PMT4	0	0	0	0	0	1	0
Glutamine	SCP160	0	0	0	0	0	1	0
Glutamine	CCT8	0	0	0	0	0	1	0
valine	RPS0B	0	0	0	0	0	1	0
Tryptophan	RHO1	0	0	0	0	0	1	0
Glutamine	LEU1	0	0	0	0	0	1	0
Methionine	HIP1	0	0	0	0	0	1	0
Tryptophan	ERG1	0	0	0	0	0	1	0
Glutamine	TIM22	0	0	0	0	0	1	0
Glutamine	PMT4	0	0	0	0	0	1	0
Serine	ILV5	0	0	0	0	0	1	0
Glutamine	SET7	0	0	0	0	0	1	0
Methionine	ARL1	0	0	0	0	0	1	0
Glutamine	BAT1	0	0	0	0	0	1	0
Glycine	URK1	0	0	0	0	0	1	0
Threonine	ZUO1	0	0	0	0	0	1	0
Glutamine	GIM3	0	0	0	0	0	1	0
Glutamine	SHE3	0	0	0	0	0	1	0
Histidine	FUN12	0	0	0	0	0	1	0
Methionine	CKA1	0	0	0	0	0	1	0
Glutamine	SOL3	0	0	0	0	0	1	0
Methionine	MNS1	0	0	0	0	0	1	0
Glutamine	YOR169C	0	0	0	0	0	1	0
Methionine	MAS2	0	0	0	0	0	1	0
Threonine	YDR417C	0	0	0	0	0	1	0
Glutamine	EMP70	0	0	0	0	0	1	0
Methionine	CCT6	0	0	0	0	0	1	0
Methionine	PRO2	0	0	0	0	0	1	0
Lysine	DPM1	0	0	0	0	0	1	0
Methionine	ADE12	0	0	0	0	0	1	0
Glutamine	YBR187W	0	0	0	0	0	1	0
Methionine	TIM50	0	0	0	0	0	1	0
Serine	YLR198C	0	0	0	0	0	1	0
Serine	POL5	0	0	0	0	0	1	0
Serine	RPS17B	0	0	0	0	0	1	0
Glycine	YJL118W	0	0	0	0	0	1	0
Serine	YLL044W	0	0	0	0	0	1	0
valine	RPS15	0	0	0	0	0	1	0
Serine	RPL43A	0	0	0	0	0	1	0
Isoleucine	DUR1,2	0	0	0	0	0	1	0
Methionine	YDL036C	0	0	0	0	0	1	0
Threonine	CRN1	0	0	0	0	0	1	0
Threonine	YLR076C	0	0	0	0	0	1	0
Threonine	TAL1	0	0	0	0	0	1	0
Serine	RPS23B	0	0	0	0	0	1	0
Histidine	SCW10	0	0	0	0	0	1	0
Histidine	SSB1	0	0	0	0	0	1	0
Glutamine	ERP2	0	0	0	0	0	1	0
Threonine	SOL3	0	0	0	0	0	1	0
Glutamine	YOR051C	0	0	0	0	0	1	0
Methionine	ZUO1	0	0	0	0	0	1	0
valine	RPS19B	0	0	0	0	0	1	0
Glutamine	THS1	0	0	0	0	0	1	0
Threonine	RPG1	0	0	0	0	0	1	0
Methionine	PLP2	0	0	0	0	0	1	0
Glutamine	YOR277C	0	0	0	0	0	1	0
Threonine	PMU1	0	0	0	0	0	1	0
valine	NEW1	0	0	0	0	0	1	0
Serine	RPL13B	0	0	0	0	0	1	0
Glutamine	YLR076C	0	0	0	0	0	1	0
Glutamine	SCJ1	0	0	0	0	0	1	0
Serine	YKL056C	0	0	0	0	0	1	0
Threonine	ADK1	0	0	0	0	0	1	0
Lysine	ADO1	0	0	0	0	0	1	0
Glutamine	MET10	0	0	0	0	0	1	0
Threonine	DPM1	0	0	0	0	0	1	0
Glutamine	YOL057W	0	0	0	0	0	1	0
Glutamine	SSB2	0	0	0	0	0	1	0
Phenylalanine	AXL2	0	0	0	0	0	1	0
Serine	RPL14B	0	0	0	0	0	1	0
Glycine	KRE6	0	0	0	0	0	1	0
Methionine	URA3	0	0	0	0	0	1	0
Glutamine	PFK1	0	0	0	0	0	1	0
Threonine	YJL200C	0	0	0	0	0	1	0
Histidine	HOM2	0	0	0	0	0	1	0
Serine	RPL2A	0	0	0	0	0	1	0
Methionine	GSH2	0	0	0	0	0	1	0
Threonine	PMT1	0	0	0	0	0	1	0
Serine	RPL33B	0	0	0	0	0	1	0
Methionine	SEC12	0	0	0	0	0	1	0
Lysine	ARO4	0	0	0	0	0	1	0
Histidine	TKL1	0	0	0	0	0	1	0
Threonine	MCD1	0	0	0	0	0	1	0
Histidine	TAL1	0	0	0	0	0	1	0
Methionine	YKL027W	0	0	0	0	0	1	0
Threonine	MRS1	0	0	0	0	0	1	0
valine	HMT1	0	0	0	0	0	1	0
Methionine	STE12	0	0	0	0	0	1	0
Methionine	HIS3	0	0	0	0	0	1	0
Histidine	SPT14	0	0	0	0	0	1	0
Methionine	ERP2	0	0	0	0	0	1	0
Histidine	SSB2	0	0	0	0	0	1	0
Glutamine	NAT1	0	0	0	0	0	1	0
valine	GND1	0	0	0	0	0	1	0
Glutamine	HOM2	0	0	0	0	0	1	0
Methionine	TIF5	0	0	0	0	0	1	0
Threonine	DYS1	0	0	0	0	0	1	0
Glutamine	HIP1	0	0	0	0	0	1	0
valine	APT1	0	0	0	0	0	1	0
Serine	CDC19	0	0	0	0	0	1	0
Glycine	YRB1	0	0	0	0	0	1	0
Glutamine	UNG1	0	0	0	0	0	1	0
Serine	RPL37B	0	0	0	0	0	1	0
Glutamine	YBL081W	0	0	0	0	0	1	0
Serine	RPL43B	0	0	0	0	0	1	0
Threonine	UNG1	0	0	0	0	0	1	0
Isoleucine	ERG25	0	0	0	0	0	1	0
Phenylalanine	SEC53	0	0	0	0	0	1	0
Threonine	ARO4	0	0	0	0	0	1	0
Glutamine	MGE1	0	0	0	0	0	1	0
Serine	TIF3	0	0	0	0	0	1	0
Methionine	APA1	0	0	0	0	0	1	0
Methionine	PMT1	0	0	0	0	0	1	0
Serine	LEU2	0	0	0	0	0	1	0
Serine	RPS7B	0	0	0	0	0	1	0
Methionine	UNG1	0	0	0	0	0	1	0
Glutamine	LEU2	0	0	0	0	0	1	0
Methionine	NUP60	0	0	0	0	0	1	0
Serine	RPP2A	0	0	0	0	0	1	0
Serine	RPL17B	0	0	0	0	0	1	0
Serine	RPL11A	0	0	0	0	0	1	0
Threonine	SUP45	0	0	0	0	0	1	0
Methionine	YHB1	0	0	0	0	0	1	0
Histidine	YJL200C	0	0	0	0	0	1	0
Methionine	SUB2	0	0	0	0	0	1	0
Methionine	ERV25	0	0	0	0	0	1	0
valine	RPL43B	0	0	0	0	0	1	0
Alanine	OYE2	0	0	0	0	0	1	0
Methionine	ERG10	0	0	0	0	0	1	0
Glutamine	MAS2	0	0	0	0	0	1	0
Isoleucine	RNR4	0	0	0	0	0	1	0
Threonine	MKC7	0	0	0	0	0	1	0
Glutamine	SUP45	0	0	0	0	0	1	0
Methionine	YNR021W	0	0	0	0	0	1	0
Methionine	YBR220C	0	0	0	0	0	1	0
valine	RPS2	0	0	0	0	0	1	0
Glutamine	ADK1	0	0	0	0	0	1	0
Threonine	TKL1	0	0	0	0	0	1	0
Histidine	YLR076C	0	0	0	0	0	1	0
Lysine	YPL197C	0	0	0	0	0	1	0
Methionine	SKG6	0	0	0	0	0	1	0
Tryptophan	ERG11	0	0	0	0	0	1	0
Threonine	ARO1	0	0	0	0	0	1	0
Threonine	SUP35	0	0	0	0	0	1	0
Threonine	SUB2	0	0	0	0	0	1	0
Asparagine	TSA1	0	0	0	0	0	1	0
Glutamate	TSA1	0	0	0	0	0	1	0
Glutamine	ALA1	0	0	0	0	0	1	0
Threonine	TIF5	0	0	0	0	0	1	0
Methionine	PRP39	0	0	0	0	0	1	0
valine	RPL6A	0	0	0	0	0	1	0
Serine	RPP1B	0	0	0	0	0	1	0
Serine	HXT4	0	0	0	0	0	1	0
Serine	RPL24B	0	0	0	0	0	1	0
valine	RPS9A	0	0	0	0	0	1	0
Glutamine	TAL1	0	0	0	0	0	1	0
Glutamine	PAM18	0	0	0	0	0	1	0
Threonine	PRO2	0	0	0	0	0	1	0
Methionine	SHE3	0	0	0	0	0	1	0
Methionine	DCD1	0	0	0	0	0	1	0
Phenylalanine	PGI1	0	0	0	0	0	1	0
Methionine	NPT1	0	0	0	0	0	1	0
Aspartate	CIS3	0	0	0	0	0	1	0
Glutamine	RVB2	0	0	0	0	0	1	0
Threonine	CCT8	0	0	0	0	0	1	0
Glutamine	GDA1	0	0	0	0	0	1	0
Threonine	PRO3	0	0	0	0	0	1	0
Glutamine	YJL200C	0	0	0	0	0	1	0
Glutamine	FCY2	0	0	0	0	0	1	0
Methionine	MAD2	0	0	0	0	0	1	0
Glutamine	PAC1	0	0	0	0	0	1	0
Serine	PRP43	0	0	0	0	0	1	0
Methionine	LEU1	0	0	0	0	0	1	0
Methionine	GCN20	0	0	0	0	0	1	0
Glutamine	GSH2	0	0	0	0	0	1	0
Threonine	SKG6	0	0	0	0	0	1	0
Methionine	PEX31	0	0	0	0	0	1	0
Serine	RPL42A	0	0	0	0	0	1	0
Serine	RPS2	0	0	0	0	0	1	0
Serine	RPL12B	0	0	0	0	0	1	0
Methionine	SEC65	0	0	0	0	0	1	0
Histidine	SSE1	0	0	0	0	0	1	0
Methionine	CDC60	0	0	0	0	0	1	0
Glutamine	STT3	0	0	0	0	0	1	0
Glutamine	MYO4	0	0	0	0	0	1	0
Lysine	LEU2	0	0	0	0	0	1	0
Methionine	YBL081W	0	0	0	0	0	1	0
Histidine	THS1	0	0	0	0	0	1	0
Serine	RPS0A	0	0	0	0	0	1	0
Methionine	PMU1	0	0	0	0	0	1	0
Histidine	YKL153W	0	0	0	0	0	1	0
Glutamine	ADH6	0	0	0	0	0	1	0
Serine	YHR020W	0	0	0	0	0	1	0
Serine	RPS13	0	0	0	0	0	1	0
valine	RPL43A	0	0	0	0	0	1	0
Threonine	LCB2	0	0	0	0	0	1	0
Glutamine	AST1	0	0	0	0	0	1	0
Methionine	ISU2	0	0	0	0	0	1	0
Methionine	NPY1	0	0	0	0	0	1	0
Threonine	ERG4	0	0	0	0	0	1	0
Methionine	SWD3	0	0	0	0	0	1	0
Glutamine	UTR2	0	0	0	0	0	1	0
Histidine	RRP3	0	0	0	0	0	1	0
Threonine	GDA1	0	0	0	0	0	1	0
Methionine	YPL197C	0	0	0	0	0	1	0
Threonine	YKL027W	0	0	0	0	0	1	0
Glutamate	KTR2	0	0	0	0	0	1	0
Aspartate	SSE1	0	0	0	0	0	1	0
Isoleucine	CWP2	0	0	0	0	0	1	0
Glutamine	CRN1	0	0	0	0	0	1	0
Glutamine	CCT4	0	0	0	0	0	1	0
valine	RPS23A	0	0	0	0	0	1	0
Methionine	SCJ1	0	0	0	0	0	1	0
Serine	RPL12A	0	0	0	0	0	1	0
Aspartate	PSA1	0	0	0	0	0	1	0
Alanine	PCL1	0	0	0	0	0	1	0
Alanine	CCW14	0	0	0	0	0	1	0
Glutamine	SER2	0	0	0	0	0	1	0
Methionine	TRR1	0	0	0	0	0	1	0
Glutamine	TEF4	0	0	0	0	0	1	0
Glutamine	SUI3	0	0	0	0	0	1	0
Glutamine	YCR013C	0	0	0	0	0	1	0
Glutamine	SUP35	0	0	0	0	0	1	0
Glutamine	HUT1	0	0	0	0	0	1	0
Glutamine	HIS4	0	0	0	0	0	1	0
Glutamine	YPL197C	0	0	0	0	0	1	0
Threonine	HIS4	0	0	0	0	0	1	0
Glutamine	MCD1	0	0	0	0	0	1	0
Glutamine	ISU2	0	0	0	0	0	1	0
Glutamine	KAP122	0	0	0	0	0	1	0
Threonine	SSB2	0	0	0	0	0	1	0
Glutamine	YKL153W	0	0	0	0	0	1	0
Serine	RPL20B	0	0	0	0	0	1	0
Glutamine	SKG6	0	0	0	0	0	1	0
Serine	ADO1	0	0	0	0	0	1	0
Histidine	ILV2	0	0	0	0	0	1	0
Alanine	ERG5	0	0	0	0	0	1	0
Isoleucine	RNR2	0	0	0	0	0	1	0
Histidine	YPL197C	0	0	0	0	0	1	0
Glutamine	GUK1	0	0	0	0	0	1	0
Histidine	CHS7	0	0	0	0	0	1	0
Glutamine	CKA1	0	0	0	0	0	1	0
Serine	RPS0B	0	0	0	0	0	1	0
Serine	RPS29A	0	0	0	0	0	1	0
Threonine	YBR206W	0	0	0	0	0	1	0
Serine	MGM101	0	0	0	0	0	1	0
Threonine	UTR2	0	0	0	0	0	1	0
Serine	RPS19A	0	0	0	0	0	1	0
Threonine	YPL197C	0	0	0	0	0	1	0
Threonine	LOT5	0	0	0	0	0	1	0
Threonine	PSE1	0	0	0	0	0	1	0
valine	ADO1	0	0	0	0	0	1	0
Serine	ILV2	0	0	0	0	0	1	0
Methionine	YOR169C	0	0	0	0	0	1	0
Methionine	YMR321C	0	0	0	0	0	1	0
Serine	CHS7	0	0	0	0	0	1	0
Threonine	TIM22	0	0	0	0	0	1	0
Serine	PGI1	0	0	0	0	0	1	0
Methionine	SUP35	0	0	0	0	0	1	0
Methionine	SHE2	0	0	0	0	0	1	0
Methionine	SER2	0	0	0	0	0	1	0
Methionine	YCL045C	0	0	0	0	0	1	0
Methionine	YBR261C	0	0	0	0	0	1	0
Serine	RPL17A	0	0	0	0	0	1	0
Threonine	GDH1	0	0	0	0	0	1	0
Methionine	LCB2	0	0	0	0	0	1	0
Methionine	PRO3	0	0	0	0	0	1	0
Threonine	HUT1	0	0	0	0	0	1	0
Glutamine	MKC7	0	0	0	0	0	1	0
Threonine	GUK1	0	0	0	0	0	1	0
Threonine	SUR4	0	0	0	0	0	1	0
Threonine	ARC1	0	0	0	0	0	1	0
Threonine	APA1	0	0	0	0	0	1	0
Threonine	CKA1	0	0	0	0	0	1	0
Threonine	CCT4	0	0	0	0	0	1	0
Serine	RPS24A	0	0	0	0	0	1	0
Methionine	ADH6	0	0	0	0	0	1	0
Isoleucine	ERG3	0	0	0	0	0	1	0
Glutamine	ERG4	0	0	0	0	0	1	0
Methionine	AST1	0	0	0	0	0	1	0
Glutamine	CWH41	0	0	0	0	0	1	0
Methionine	ADK1	0	0	0	0	0	1	0
Histidine	BUD28	0	0	0	0	0	1	0
Glutamine	YMR321C	0	0	0	0	0	1	0
Methionine	GCN1	0	0	0	0	0	1	0
Histidine	LEU2	0	0	0	0	0	1	0
Histidine	ERG4	0	0	0	0	0	1	0
Histidine	ADO1	0	0	0	0	0	1	0
Methionine	NMT1	0	0	0	0	0	1	0
Methionine	NAT1	0	0	0	0	0	1	0
Methionine	MYO4	0	0	0	0	0	1	0
Methionine	PAC1	0	0	0	0	0	1	0
Methionine	OST5	0	0	0	0	0	1	0
Glutamine	LOT5	0	0	0	0	0	1	0
Lysine	RPL14A	0	0	0	0	0	1	0
Methionine	CCT8	0	0	0	0	0	1	0
Methionine	CCT4	0	0	0	0	0	1	0
Methionine	MKC7	0	0	0	0	0	1	0
Methionine	HUT1	0	0	0	0	0	1	0
Methionine	LOT5	0	0	0	0	0	1	0
Serine	TIF4631	0	0	0	0	0	1	0
Serine	TIF2	0	0	0	0	0	1	0
Methionine	HMO1	0	0	0	0	0	1	0
Methionine	GDA1	0	0	0	0	0	1	0
Aspartate	TSA1	0	0	0	0	0	1	0
Serine	RPL27B	0	0	0	0	0	1	0
Tryptophan	PST1	0	0	0	0	0	1	0
Methionine	DYS1	0	0	0	0	0	1	0
Threonine	GSP1	0	0	0	0	0	1	0
Glutamate	PSA1	0	0	0	0	0	1	0
Methionine	GPI11	0	0	0	0	0	1	0
Threonine	ERV25	0	0	0	0	0	1	0
Glutamine	URA3	0	0	0	0	0	1	0
valine	GPM1	0	0	0	0	0	1	0
Methionine	SET7	0	0	0	0	0	1	0
Glutamate	CIS3	0	0	0	0	0	1	0
Threonine	YOL057W	0	0	0	0	0	1	0
Histidine	NOP58	0	0	0	0	0	1	0
valine	RPP1B	0	0	0	0	0	1	0
Glutamine	YPL176C	0	0	0	0	0	1	0
Threonine	SEC26	0	0	0	0	0	1	0
Threonine	CTP1	0	0	0	0	0	1	0
Phenylalanine	RPS14B	0	0	0	0	0	1	0
Glutamine	YLR179C	0	0	0	0	0	1	0
Glutamine	MET17	0	0	0	0	0	1	0
Glutamine	ADE3	0	0	0	0	0	1	0
Glutamine	THR4	0	0	0	0	0	1	0
Glutamine	HCR1	0	0	0	0	0	1	0
Glutamine	ZUO1	0	0	0	0	0	1	0
Glutamine	NUP60	0	0	0	0	0	1	0
Threonine	CDC21	0	0	0	0	0	1	0
Glutamine	BUD7	0	0	0	0	0	1	0
Threonine	TOM5	0	0	0	0	0	1	0
Glutamine	TOM5	0	0	0	0	0	1	0
Threonine	PMT4	0	0	0	0	0	1	0
Glutamine	HIS3	0	0	0	0	0	1	0
Methionine	TAL1	0	0	0	0	0	1	0
Serine	RPL14A	0	0	0	0	0	1	0
Glycine	BGL2	0	0	0	0	0	1	0
Glutamine	PMU1	0	0	0	0	0	1	0
Phenylalanine	GAS2	0	0	0	0	0	1	0
Glutamine	SEC65	0	0	0	0	0	1	0
Serine	RPL28	0	0	0	0	0	1	0
Methionine	YBR206W	0	0	0	0	0	1	0
Methionine	SWP1	0	0	0	0	0	1	0
Methionine	PHO88	0	0	0	0	0	1	0
Glutamine	HIS1	0	0	0	0	0	1	0
Methionine	APL6	0	0	0	0	0	1	0
Methionine	MKT1	0	0	0	0	0	1	0
Glutamine	DPM1	0	0	0	0	0	1	0
Serine	RPS23A	0	0	0	0	0	1	0
Threonine	YMR321C	0	0	0	0	0	1	0
valine	RPL14A	0	0	0	0	0	1	0
valine	RPL21B	0	0	0	0	0	1	0
Threonine	CWH41	0	0	0	0	0	1	0
Lysine	RPL2B	0	0	0	0	0	1	0
Tryptophan	ERG25	0	0	0	0	0	1	0
Threonine	YOR169C	0	0	0	0	0	1	0
Threonine	PLP2	0	0	0	0	0	1	0
valine	RPL13B	0	0	0	0	0	1	0
Serine	BUD19	0	0	0	0	0	1	0
Methionine	HIS4	0	0	0	0	0	1	0
Tyrosine	ATG10	0	0	0	0	0	1	0
Tryptophan	HSP150	0	0	0	0	0	1	0
Methionine	SEC63	0	0	0	0	0	1	0
Methionine	PAM18	0	0	0	0	0	1	0
Glutamine	NOP58	0	0	0	0	0	1	0
Serine	RPL22A	0	0	0	0	0	1	0
Methionine	GLN1	0	0	0	0	0	1	0
Methionine	YEL001C	0	0	0	0	0	1	0
Glutamine	YCK2	0	0	0	0	0	1	0
valine	RPS17A	0	0	0	0	0	1	0
Methionine	ALG5	0	0	0	0	0	1	0
Threonine	SET7	0	0	0	0	0	1	0
Glutamine	GND1	0	0	0	0	0	1	0
Lysine	YPR044C	0	0	0	0	0	1	0
Threonine	YCK2	0	0	0	0	0	1	0
Methionine	RSC6	0	0	0	0	0	1	0
Serine	PRT1	0	0	0	0	0	1	0
Threonine	ISU2	0	0	0	0	0	1	0
Lysine	RPL23A	0	0	0	0	0	1	0
Histidine	NOP1	0	0	0	0	0	1	0
Histidine	PHO88	0	0	0	0	0	1	0
Threonine	GSH2	0	0	0	0	0	1	0
valine	RPL24B	0	0	0	0	0	1	0
Methionine	MNN9	0	0	0	0	0	1	0
valine	RPL26A	0	0	0	0	0	1	0
Threonine	SHE2	0	0	0	0	0	1	0
Serine	RPL37A	0	0	0	0	0	1	0
Glutamine	MRPL19	0	0	0	0	0	1	0
Glutamine	SWD3	0	0	0	0	0	1	0
Serine	RPL29	0	0	0	0	0	1	0
Threonine	URA3	0	0	0	0	0	1	0
Methionine	SEC13	0	0	0	0	0	1	0
Glutamine	MIS1	0	0	0	0	0	1	0
Methionine	PAC10	0	0	0	0	0	1	0
Methionine	HIS1	0	0	0	0	0	1	0
Methionine	KAP122	0	0	0	0	0	1	0
Histidine	PFK1	0	0	0	0	0	1	0
Methionine	MRPL19	0	0	0	0	0	1	0
Serine	RPS10A	0	0	0	0	0	1	0
Threonine	HIS1	0	0	0	0	0	1	0
Serine	CDC45	0	0	0	0	0	1	0
valine	RPL27B	0	0	0	0	0	1	0
Methionine	BAT1	0	0	0	0	0	1	0
Methionine	SCP160	0	0	0	0	0	1	0
Serine	PPT1	0	0	0	0	0	1	0
Threonine	YCR013C	0	0	0	0	0	1	0
Serine	RPL21A	0	0	0	0	0	1	0
Threonine	ERG10	0	0	0	0	0	1	0
Glutamine	CDC21	0	0	0	0	0	1	0
Serine	DUS3	0	0	0	0	0	1	0
Methionine	PKR1	0	0	0	0	0	1	0
Tryptophan	CCW12	0	0	0	0	0	1	0
Serine	RPL10	0	0	0	0	0	1	0
Glutamine	DYS1	0	0	0	0	0	1	0
valine	PGI1	0	0	0	0	0	1	0
Methionine	CWH41	0	0	0	0	0	1	0
Threonine	GCN1	0	0	0	0	0	1	0
Serine	RPL6B	0	0	0	0	0	1	0
Methionine	TIM22	0	0	0	0	0	1	0
valine	RPS0A	0	0	0	0	0	1	0
Methionine	RHO2	0	0	0	0	0	1	0
Threonine	PRT1	0	0	0	0	0	1	0
Serine	YEF3	0	0	0	0	0	1	0
Alanine	YMR173W-A	0	0	0	0	0	1	0
Threonine	PAC10	0	0	0	0	0	1	0
Threonine	BUD7	0	0	0	0	0	1	0
Threonine	SUI3	0	0	0	0	0	1	0
Arginine	PET9	0	0	0	0	0	1	0
Serine	RPS19B	0	0	0	0	0	1	0
Glutamine	YER156C	0	0	0	0	0	1	0
Methionine	PAN6	0	0	0	0	0	1	0
Methionine	MVD1	0	0	0	0	0	1	0
Threonine	NOP58	0	0	0	0	0	1	0
Threonine	OST5	0	0	0	0	0	1	0
Threonine	TEF4	0	0	0	0	0	1	0
Glutamine	NPT1	0	0	0	0	0	1	0
Threonine	PKR1	0	0	0	0	0	1	0
Asparagine	DFG5	0	0	0	0	0	1	0
Methionine	YDR266C	0	0	0	0	0	1	0
Methionine	SRP72	0	0	0	0	0	1	0
Serine	RPS9A	0	0	0	0	0	1	0
Glycine	PFK2	0	0	0	0	0	1	0
Histidine	RPL20A	0	0	0	0	0	1	0
Glutamine	MRS1	0	0	0	0	0	1	0
Methionine	MAS6	0	0	0	0	0	1	0
Serine	SEC53	0	0	0	0	0	1	0
Methionine	LCB1	0	0	0	0	0	1	0
Glutamine	SEC63	0	0	0	0	0	1	0
Threonine	YBR187W	0	0	0	0	0	1	0
Methionine	PSD1	0	0	0	0	0	1	0
Glutamine	GCN1	0	0	0	0	0	1	0
Methionine	RFC1	0	0	0	0	0	1	0
Serine	TIF34	0	0	0	0	0	1	0
Histidine	PRO1	0	0	0	0	0	1	0
Glutamine	PLP2	0	0	0	0	0	1	0
Glutamine	NOP1	0	0	0	0	0	1	0
Histidine	PSA1	0	0	0	0	0	1	0
Glutamine	SAH1	0	0	0	0	0	1	0
Tryptophan	DUR1,2	0	0	0	0	0	1	0
Tryptophan	CWP2	0	0	0	0	0	1	0
Glutamine	ADO1	0	0	0	0	0	1	0
Serine	SSE1	0	0	0	0	0	1	0
Serine	YCR013C	0	0	0	0	0	1	0
Serine	SSB2	0	0	0	0	0	1	0
Glutamine	PAC10	0	0	0	0	0	1	0
valine	HSC82	0	0	0	0	0	1	0
Threonine	RPB3	0	0	0	0	0	1	0
Glutamate	PRM5	0	0	0	0	0	1	0
Threonine	YBR261C	0	0	0	0	0	1	0
Proline	SPA2	0	0	0	0	0	1	0
Methionine	GGC1	0	0	0	0	0	1	0
Glutamine	TKL1	0	0	0	0	0	1	0
Histidine	SOL3	0	0	0	0	0	1	0
Serine	RPS6A	0	0	0	0	0	1	0
Serine	RPS1A	0	0	0	0	0	1	0
Methionine	MED1	0	0	0	0	0	1	0
Glutamine	CYS3	0	0	0	0	0	1	0
Threonine	NPT1	0	0	0	0	0	1	0
Methionine	ESF1	0	0	0	0	0	1	0
Serine	RRP3	0	0	0	0	0	1	0
Threonine	BUD28	0	0	0	0	0	1	0
Threonine	GCN3	0	0	0	0	0	1	0
Glutamine	SRM1	0	0	0	0	0	1	0
Glutamine	APA1	0	0	0	0	0	1	0
Threonine	HIS3	0	0	0	0	0	1	0
Threonine	MGE1	0	0	0	0	0	1	0
Threonine	NAT1	0	0	0	0	0	1	0
Methionine	CRN1	0	0	0	0	0	1	0
Threonine	ARD1	0	0	0	0	0	1	0
Methionine	YPL199C	0	0	0	0	0	1	0
Histidine	SUI3	0	0	0	0	0	1	0
Glutamine	PHO88	0	0	0	0	0	1	0
Methionine	YAR075W	0	0	0	0	0	1	0
Methionine	ARO1	0	0	0	0	0	1	0
Serine	APT1	0	0	0	0	0	1	0
Methionine	YKL153W	0	0	0	0	0	1	0
Lysine	ERG4	0	0	0	0	0	1	0
Serine	RPL16B	0	0	0	0	0	1	0
Tryptophan	PCM1	0	0	0	0	0	1	0
Serine	RPL8A	0	0	0	0	0	1	0
Methionine	GUK1	0	0	0	0	0	1	0
Glutamine	YOR006C	0	0	0	0	0	1	0
Glutamine	YBR030W	0	0	0	0	0	1	0
Methionine	SEC26	0	0	0	0	0	1	0
Glutamine	YPL199C	0	0	0	0	0	1	0
Serine	RPS9B	0	0	0	0	0	1	0
Glutamine	SUB2	0	0	0	0	0	1	0
Glutamine	RPG1	0	0	0	0	0	1	0
Methionine	YER156C	0	0	0	0	0	1	0
Tryptophan	RNR2	0	0	0	0	0	1	0
Glutamine	TOS2	0	0	0	0	0	1	0
Threonine	ADO1	0	0	0	0	0	1	0
Serine	RPS15	0	0	0	0	0	1	0
Glutamine	FEN1	0	0	0	0	0	1	0
Threonine	SLC1	0	0	0	0	0	1	0
Glutamine	MAD2	0	0	0	0	0	1	0
Glutamine	BPL1	0	0	0	0	0	1	0
Threonine	ATF2	0	0	0	0	0	1	0
Glutamine	RHO2	0	0	0	0	0	1	0
Serine	RPL40A	0	0	0	0	0	1	0
Threonine	PAM18	0	0	0	0	0	1	0
Serine	RPL26B	0	0	0	0	0	1	0
Methionine	RGD2	0	0	0	0	0	1	0
Histidine	RPL2B	0	0	0	0	0	1	0
Histidine	YBL077W	0	0	0	0	0	1	0
Methionine	YBR187W	0	0	0	0	0	1	0
Glutamine	LCB2	0	0	0	0	0	1	0
Serine	RPL26A	0	0	0	0	0	1	0
Threonine	NOP1	0	0	0	0	0	1	0
Methionine	PSE1	0	0	0	0	0	1	0
Threonine	YER156C	0	0	0	0	0	1	0
Methionine	NOP58	0	0	0	0	0	1	0
Methionine	TOM5	0	0	0	0	0	1	0
Glutamine	SUR4	0	0	0	0	0	1	0
Serine	RPL33A	0	0	0	0	0	1	0
Methionine	CDS1	0	0	0	0	0	1	0
Threonine	PHO88	0	0	0	0	0	1	0
Threonine	RPL2B	0	0	0	0	0	1	0
Glutamine	YKL027W	0	0	0	0	0	1	0
Methionine	ARO3	0	0	0	0	0	1	0
Glutamine	SCW10	0	0	0	0	0	1	0
Serine	RPL16A	0	0	0	0	0	1	0
Threonine	SPE4	0	0	0	0	0	1	0
Methionine	YNL010W	0	0	0	0	0	1	0
valine	SSE1	0	0	0	0	0	1	0
Threonine	SCP160	0	0	0	0	0	1	0
Methionine	MGE1	0	0	0	0	0	1	0
Serine	RPL4A	0	0	0	0	0	1	0
Isoleucine	ERG5	0	0	0	0	0	1	0
Valine	RPS19A	0	0	0	0	0	1	0
Methionine	OST2	0	0	0	0	0	1	0
Threonine	FEN1	0	0	0	0	0	1	0
Tryptophan	ERG5	0	0	0	0	0	1	0
Threonine	YCL045C	0	0	0	0	0	1	0
Methionine	ABP140	0	0	0	0	0	1	0
valine	EFB1	0	0	0	0	0	1	0
Serine	NCL1	0	0	0	0	0	1	0
Serine	ALD5	0	0	0	0	0	1	0
valine	PET122	0	0	0	0	0	1	0
Threonine	PAC1	0	0	0	0	0	1	0
Methionine	TOM40	0	0	0	0	0	1	0
Glutamine	PSE1	0	0	0	0	0	1	0
Serine	YMR304C-A	0	0	0	0	0	1	0
valine	RPS16A	0	0	0	0	0	1	0
Methionine	MCD1	0	0	0	0	0	1	0
Methionine	DPM1	0	0	0	0	0	1	0
valine	TDH1	0	0	0	0	0	1	0
Glutamine	SEC26	0	0	0	0	0	1	0
Phenylalanine	SSE1	0	0	0	0	0	1	0
valine	RPS13	0	0	0	0	0	1	0
Glutamine	FUN12	0	0	0	0	0	1	0
Threonine	RHO2	0	0	0	0	0	1	0
Methionine	YHR133C	0	0	0	0	0	1	0
Methionine	YOL057W	0	0	0	0	0	1	0
Glutamine	SAM4	0	0	0	0	0	1	0
Serine	EFB1	0	0	0	0	0	1	0
Glutamine	CHS7	0	0	0	0	0	1	0
Serine	ERG4	0	0	0	0	0	1	0
Serine	URA2	0	0	0	0	0	1	0
Glutamine	HXT2	0	0	0	0	0	1	0
valine	RPL12B	0	0	0	0	0	1	0
Glutamine	GSP1	0	0	0	0	0	1	0
Threonine	YBL077W	0	0	0	0	0	1	0
Serine	RPL40B	0	0	0	0	0	1	0
Histidine	GND1	0	0	0	0	0	1	0
Threonine	HUF1	0	0	0	0	0	1	0
Serine	PSA1	0	0	0	0	0	1	0
Threonine	DCD1	0	0	0	0	0	1	0
Methionine	SOL3	0	0	0	0	0	1	0
Glutamine	GCN3	0	0	0	0	0	1	0
Threonine	RVB2	0	0	0	0	0	1	0
valine	RPL33A	0	0	0	0	0	1	0
Threonine	YKL153W	0	0	0	0	0	1	0
Serine	GND1	0	0	0	0	0	1	0
valine	CDC19	0	0	0	0	0	1	0
Methionine	RTN1	0	0	0	0	0	1	0
Threonine	JEM1	0	0	0	0	0	1	0
Methionine	YOR051C	0	0	0	0	0	1	0
valine	RPS17B	0	0	0	0	0	1	0
Methionine	GSP1	0	0	0	0	0	1	0
Glutamine	DCD1	0	0	0	0	0	1	0
valine	RPL10	0	0	0	0	0	1	0
Histidine	MGM101	0	0	0	0	0	1	0
Glutamine	BUD28	0	0	0	0	0	1	0
Methionine	ATF2	0	0	0	0	0	1	0
Serine	RPS6B	0	0	0	0	0	1	0
Methionine	RPN1	0	0	0	0	0	1	0
Serine	SSB1	0	0	0	0	0	1	0
Methionine	EMP70	0	0	0	0	0	1	0
Histidine	YOR006C	0	0	0	0	0	1	0
Lysine	THS1	0	0	0	0	0	1	0
Glutamine	CPR3	0	0	0	0	0	1	0
Threonine	SEC63	0	0	0	0	0	1	0
Serine	PRO1	0	0	0	0	0	1	0
Methionine	YPR118W	1	0	1	1	3	0	1
Lysine	GRS1	1	0	0	0	1	0	1
6-Phosphogluconic_Acid	YKL137W	0	0	0	1	1	0	1
Glutamate	MFT1	0	0	0	0	0	0	0
D-Gluconate	MVP1	0	0	0	0	0	0	0
Glutamine	HXT2	0	0	0	0	0	0	0
Proline	RDS2	0	0	0	0	0	0	0
erythrose-4-phosphate	YMR266W	0	0	0	0	0	0	0
Glutathione-Oxidized	ARG8	0	0	0	0	0	0	0
Arginine	HCR1	0	0	0	0	0	0	0
Asparagine	AAD14	0	0	0	0	0	0	0
valine	CLA4	0	0	0	0	0	0	0
Isoleucine	RBA50	0	0	0	0	0	0	0
pentose-phosphate	TRK2	0	0	0	0	0	0	0
Orotic_Acid	AYR1	0	0	0	0	0	0	0
Arginine	INO2	0	0	0	0	0	0	0
AMP	HXK1	0	0	0	0	0	0	0
Isoleucine	CBS2	0	0	0	0	0	0	0
Proline	TOM6	0	0	0	0	0	0	0
Lysine	TOK1	0	0	0	0	0	0	0
Methionine	TFC1	0	0	0	0	0	0	0
N-acetyl-ornithine	BGL2	0	0	0	0	0	0	0
NAD	YAR053W	0	0	0	0	0	0	0
NAD	SEC59	0	0	0	0	0	0	0
NAD	MCM3	0	0	0	0	0	0	0
Guanosine	ERV29	0	0	0	0	0	0	0
Phosphoenolpyruvate	YNL303W	0	0	0	0	0	0	0
hexose-phosphate	HSE1	0	0	0	0	0	0	0
Threonine	STP2	0	0	0	0	0	0	0
Glycine	RHO4	0	0	0	0	0	0	0
Lysine	TGL1	0	0	0	0	0	0	0
Histidine	COX4	0	0	0	0	0	0	0
Histidinol	YER010C	0	0	0	0	0	0	0
IMP	CDC16	0	0	0	0	0	0	0
Proline	YLR161W	0	0	0	0	0	0	0
Threonine	AGC1	0	0	0	0	0	0	0
Phosphoenolpyruvate	FRE2	0	0	0	0	0	0	0
Phenylalanine	DID2	0	0	0	0	0	0	0
Aspartate	GWT1	0	0	0	0	0	0	0
Glutamine	NGL1	0	0	0	0	0	0	0
Aspartate	YOR318C	0	0	0	0	0	0	0
Asparagine	PRS5	0	0	0	0	0	0	0
Glycine	PRS3	0	0	0	0	0	0	0
Trehalose	MRPL1	0	0	0	0	0	0	0
3-Phospho-Glycerate	CHS2	0	0	0	0	0	0	0
Asparagine	ELO1	0	0	0	0	0	0	0
Choline	SET3	0	0	0	0	0	0	0
Cystathionine	DDR48	0	0	0	0	0	0	0
3-Phospho-Glycerate	MSC2	0	0	0	0	0	0	0
Proline	ARD1	0	0	0	0	0	0	0
Isoleucine	MON2	0	0	0	0	0	0	0
Methionine	DAL81	0	0	0	0	0	0	0
pentose-phosphate	YBL059C-A	0	0	0	0	0	0	0
Serine	PDR1	0	0	0	0	0	0	0
Aspartate	QRI1	0	0	0	0	0	0	0
Lysine	IAH1	0	0	0	0	0	0	0
Histidine	ROG3	0	0	0	0	0	0	0
Phosphoenolpyruvate	RPC82	0	0	0	0	0	0	0
Asparagine	YPL108W	0	0	0	0	0	0	0
homoserine	VPS75	0	0	0	0	0	0	0
Histidine	YRA2	0	0	0	0	0	0	0
Threonine	MIP1	0	0	0	0	0	0	0
Histidinol	YAL046C	0	0	0	0	0	0	0
Arginine	BEM1	0	0	0	0	0	0	0
D-Gluconate	YOR015W	0	0	0	0	0	0	0
UDPAG	HAP5	0	0	0	0	0	0	0
Arginine	YPL108W	0	0	0	0	0	0	0
erythrose-4-phosphate	YML030W	0	0	0	0	0	0	0
Tyrosine	HIF1	0	0	0	0	0	0	0
Cytosine	KOG1	0	0	0	0	0	0	0
Trehalose	TIP1	0	0	0	0	0	0	0
UDPG	CAX4	0	0	0	0	0	0	0
Isoleucine	TAD3	0	0	0	0	0	0	0
Tryptophan	MSC3	0	0	0	0	0	0	0
2-Deoxyribose-Phosphate	YFR042W	0	0	0	0	0	0	0
Tryptophan	FBP26	0	0	0	0	0	0	0
Tyrosine	GLC8	0	0	0	0	0	0	0
Histidine	YDL085C-A	0	0	0	0	0	0	0
Glutamate	YDL050C	0	0	0	0	0	0	0
Glycine	SMC5	0	0	0	0	0	0	0
valine	RPP1	0	0	0	0	0	0	0
Serine	KTR6	0	0	0	0	0	0	0
Glutamine	YGR271C-A	0	0	0	0	0	0	0
Proline	SPI1	0	0	0	0	0	0	0
Serine	AFG3	0	0	0	0	0	0	0
Histidine	JID1	0	0	0	0	0	0	0
Threonine	YMR003W	0	0	0	0	0	0	0
Serine	SSP120	0	0	0	0	0	0	0
Serine	YNL022C	0	0	0	0	0	0	0
Methionine	YPR085C	0	0	0	0	0	0	0
Serine	SLF1	0	0	0	0	0	0	0
Glutamine	YHR198C	0	0	0	0	0	0	0
Glutamine	NRG1	0	0	0	0	0	0	0
Histidine	RNH202	0	0	0	0	0	0	0
Serine	THP1	0	0	0	0	0	0	0
NAD	RFC2	0	0	0	0	0	0	0
Glutamine	YJL206C	0	0	0	0	0	0	0
Glutamine	RLP7	0	0	0	0	0	0	0
Isoleucine	CRS5	0	0	0	0	0	0	0
Tryptophan	COX16	0	0	0	0	0	0	0
Glutamine	UPC2	0	0	0	0	0	0	0
Arginine	YPL238C	0	0	0	0	0	0	0
Glutamine	GLE1	0	0	0	0	0	0	0
Histidine	PTC7	0	0	0	0	0	0	0
Methionine	RNH1	0	0	0	0	0	0	0
Threonine	ABF2	0	0	0	0	0	0	0
Tyrosine	YIR020C	0	0	0	0	0	0	0
Threonine	MNN11	0	0	0	0	0	0	0
2-Keto-D-gluconic_Acid	SLD5	0	0	0	0	0	0	0
Histidine	RMD8	0	0	0	0	0	0	0
Tyrosine	LEU2	0	0	0	0	0	0	0
Serine	SNO4	0	0	0	0	0	0	0
Tyrosine	PDB1	0	0	0	0	0	0	0
Glyceric_Acid	YLR031W	0	0	0	0	0	0	0
Lysine	YOR1	0	0	0	0	0	0	0
Proline	PNP1	0	0	0	0	0	0	0
Tyrosine	YDR131C	0	0	0	0	0	0	0
Isoleucine	RPN1	0	0	0	0	0	0	0
valine	RSM28	0	0	0	0	0	0	0
Arginine	LYS20	0	0	0	0	0	0	0
Tryptophan	PCF11	0	0	0	0	0	0	0
Ornithine	TIF3	0	0	0	0	0	0	0
Serine	SIP5	0	0	0	0	0	0	0
Adenosine	YMR193C-A	0	0	0	0	0	0	0
Tyrosine	SWM1	0	0	0	0	0	0	0
Threonine	SCM3	0	0	0	0	0	0	0
Isoleucine	VPS8	0	0	0	0	0	0	0
valine	YBL036C	0	0	0	0	0	0	0
Aspartate	SHS1	0	0	0	0	0	0	0
Glutamine	RED1	0	0	0	0	0	0	0
Glutamate	SPT3	0	0	0	0	0	0	0
Proline	SPP381	0	0	0	0	0	0	0
Isoleucine	QDR1	0	0	0	0	0	0	0
Serine	FTH1	0	0	0	0	0	0	0
Glycine	RPL23B	0	0	0	0	0	0	0
Tyrosine	YBR139W	0	0	0	0	0	0	0
Asparagine	ADH5	0	0	0	0	0	0	0
Phenylalanine	GOS1	0	0	0	0	0	0	0
Glyceric_Acid	POP1	0	0	0	0	0	0	0
6-Phosphogluconic_Acid	PKR1	0	0	0	0	0	0	0
Tyrosine	RET3	0	0	0	0	0	0	0
Isoleucine	ALF1	0	0	0	0	0	0	0
Threonine	SSA1	0	0	0	0	0	0	0
Phenylalanine	ILV2	0	0	0	0	0	0	0
Threonine	UBC1	0	0	0	0	0	0	0
Tryptophan	SLG1	0	0	0	0	0	0	0
Asparagine	TRM2	0	0	0	0	0	0	0
Choline	PRS4	0	0	0	0	0	0	0
Glycine	MSB2	0	0	0	0	0	0	0
Glycine	YJR030C	0	0	0	0	0	0	0
Serine	URA8	0	0	0	0	0	0	0
Glyceric_Acid	ZRT1	0	0	0	0	0	0	0
Arginine	VPH1	0	0	0	0	0	0	0
Asparagine	YGR206W	0	0	0	0	0	0	0
Histidine	HXT3	0	0	0	0	0	0	0
Glutamate	ERV1	0	0	0	0	0	0	0
Serine	ATR1	0	0	0	0	0	0	0
Aspartate	PUP3	0	0	0	0	0	0	0
Asparagine	GAL1	0	0	0	0	0	0	0
Proline	YER140W	0	0	0	0	0	0	0
Glycine	HAC1	0	0	0	0	0	0	0
Methionine	VPS64	0	0	0	0	0	0	0
Arginine	MFA2	0	0	0	0	0	0	0
Threonine	MVD1	0	0	0	0	0	0	0
Threonine	YGR015C	0	0	0	0	0	0	0
homoserine	YPR116W	0	0	0	0	0	0	0
Histidine	RPC82	0	0	0	0	0	0	0
Cytosine	OST4	0	0	0	0	0	0	0
Histidine	COG6	0	0	0	0	0	0	0
Glutamine	YSP3	0	0	0	0	0	0	0
Serine	CMP2	0	0	0	0	0	0	0
carbamoyl-Aspartate	YDR267C	0	0	0	0	0	0	0
Aspartate	LRE1	0	0	0	0	0	0	0
Alanine	APL1	0	0	0	0	0	0	0
Histidine	MTW1	0	0	0	0	0	0	0
Serine	RAD1	0	0	0	0	0	0	0
Isoleucine	BZZ1	0	0	0	0	0	0	0
Methionine	YVH1	0	0	0	0	0	0	0
Histidine	CPR1	0	0	0	0	0	0	0
Histidine	MGT1	0	0	0	0	0	0	0
Adenosine	DAL5	0	0	0	0	0	0	0
AMP	ICL2	0	0	0	0	0	0	0
Glutamate	USA1	0	0	0	0	0	0	0
Proline	ERV1	0	0	0	0	0	0	0
Methionine	COS111	0	0	0	0	0	0	0
Glutathione-Oxidized	FET3	0	0	0	0	0	0	0
Inosine	YLR065C	0	0	0	0	0	0	0
Serine	YJR030C	0	0	0	0	0	0	0
Orotic_Acid	YEL074W	0	0	0	0	0	0	0
Threonine	RIM8	0	0	0	0	0	0	0
Glyceric_Acid	SNF4	0	0	0	0	0	0	0
Serine	YBR053C	0	0	0	0	0	0	0
Proline	MYO5	0	0	0	0	0	0	0
Glutamate	GLN4	0	0	0	0	0	0	0
AMP	CYB2	0	0	0	0	0	0	0
Cystathionine	NNF1	0	0	0	0	0	0	0
Phenylpyruvate	MEP2	0	0	0	0	0	0	0
Methionine	CPA2	0	0	0	0	0	0	0
Alanine	TPM2	0	0	0	0	0	0	0
Aspartate	RGD1	0	0	0	0	0	0	0
3-Phospho-Glycerate	FIN1	0	0	0	0	0	0	0
6-Phosphogluconic_Acid	YNL150W	0	0	0	0	0	0	0
carbamoyl-Aspartate	MAK11	0	0	0	0	0	0	0
Cystathionine	PRM5	0	0	0	0	0	0	0
Cytidine	IDP2	0	0	0	0	0	0	0
carbamoyl-Aspartate	MNR2	0	0	0	0	0	0	0
Choline	YOL008W	0	0	0	0	0	0	0
Glyceric_Acid	PET112	0	0	0	0	0	0	0
D-Gluconate	VMA8	0	0	0	0	0	0	0
GMP	RPL13A	0	0	0	0	0	0	0
pentose-phosphate	RPN4	0	0	0	0	0	0	0
Proline	RSC8	0	0	0	0	0	0	0
N-acetyl-ornithine	DMA2	0	0	0	0	0	0	0
Arginine	RPL41A	0	0	0	0	0	0	0
IMP	SNU114	0	0	0	0	0	0	0
2-Deoxyribose-Phosphate	MEU1	0	0	0	0	0	0	0
Threonine	YOL019W	0	0	0	0	0	0	0
Histidine	ATG17	0	0	0	0	0	0	0
Phenylalanine	SIR2	0	0	0	0	0	0	0
Alanine	NCS2	0	0	0	0	0	0	0
Proline	TUB4	0	0	0	0	0	0	0
Ornithine	IBD2	0	0	0	0	0	0	0
Cytosine	YNL213C	0	0	0	0	0	0	0
Methionine	ROD1	0	0	0	0	0	0	0
2-Deoxyribose-Phosphate	GAL83	0	0	0	0	0	0	0
Alanine	YBR063C	0	0	0	0	0	0	0
erythrose-4-phosphate	YHL008C	0	0	0	0	0	0	0
IMP	NST1	0	0	0	0	0	0	0
Glycine	YGK3	0	0	0	0	0	0	0
Asparagine	GMH1	0	0	0	0	0	0	0
Glutamine	CCT2	0	0	0	0	0	0	0
Asparagine	RPL42A	0	0	0	0	0	0	0
Glutamate	VMA6	0	0	0	0	0	0	0
Glutamine	TRF5	0	0	0	0	0	0	0
Arginine	NUP157	0	0	0	0	0	0	0
Aspartate	URA3	0	0	0	0	0	0	0
Phenylalanine	YTM1	0	0	0	0	0	0	0
GMP	GPI12	0	0	0	0	0	0	0
Histidine	YJR008W	0	0	0	0	0	0	0
Glycine	SIR4	0	0	0	0	0	0	0
Alanine	SCS7	0	0	0	0	0	0	0
Arginine	GAT2	0	0	0	0	0	0	0
Proline	PSF2	0	0	0	0	0	0	0
Cystathionine	FUN12	0	0	0	0	0	0	0
Isoleucine	YOL086W-A	0	0	0	0	0	0	0
Glutamine	RPL13B	0	0	0	0	0	0	0
erythrose-4-phosphate	YGL039W	0	0	0	0	0	0	0
Threonine	STB1	0	0	0	0	0	0	0
Serine	YCR007C	0	0	0	0	0	0	0
Glycine	GON7	0	0	0	0	0	0	0
