# Supplementary material for: Coordinated Concentration Changes of Transcripts and Metabolites in Saccharomyces cerevisiae
Source: PubMed Central journal article supplement (PMC2614473; doi:10.1371/journal.pcbi.1000270), 2009-01-30

# Reproducibility of metabolite measurements

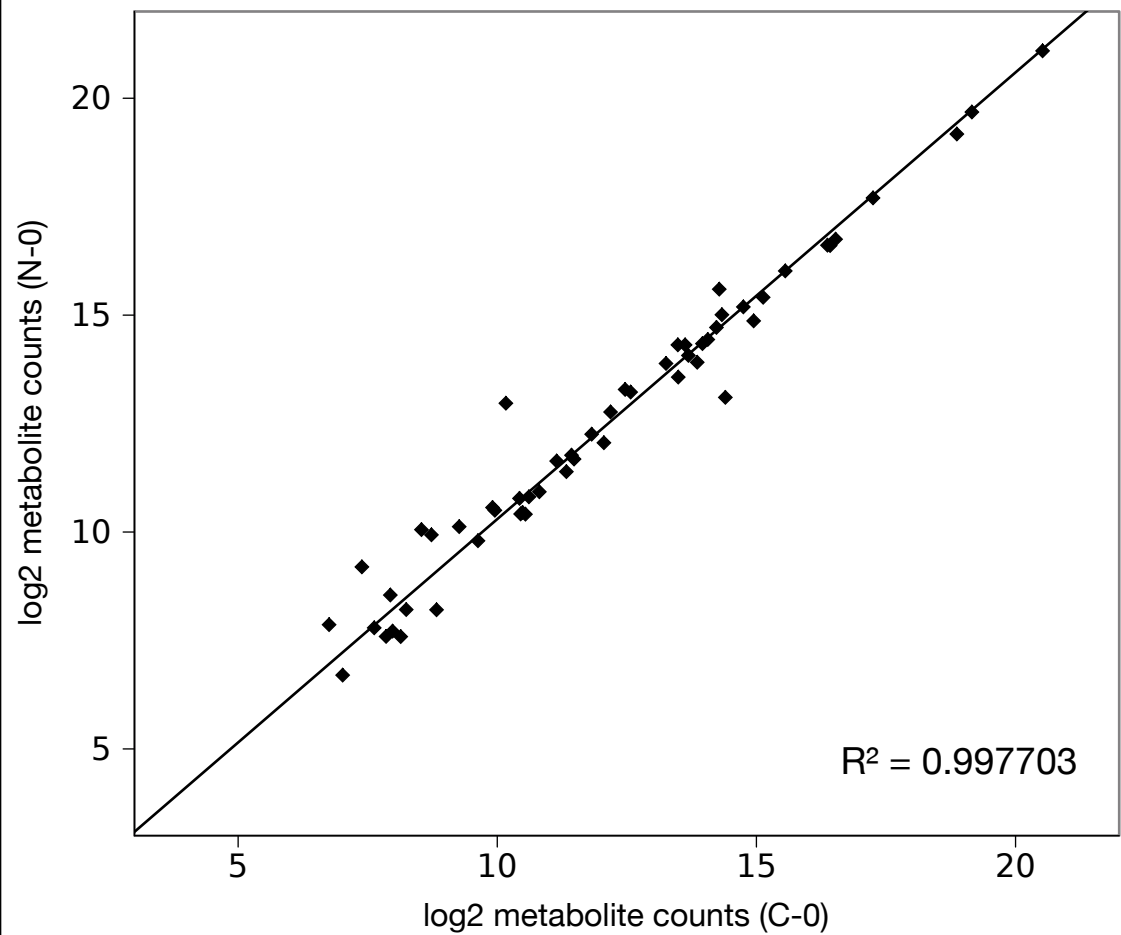

Supplement: pcbi.1000270.s006.pdf [file pcbi.1000270.s006.pdf]
